# Supplementary material for: Topological stress triggers persistent DNA lesions in ribosomal DNA with ensuing formation of PML-nucleolar compartment
Source: eLife. 2024 Oct 10;12:RP91304. doi: 10.7554/eLife.91304 (PMC11466457; doi:10.7554/eLife.91304)
Supplement: Figure 1—figure supplement 2—source data 1. [file elife-91304-fig1-figsupp2-data1.xlsx]

## Sheet: Figure 1_FS 2_part1
number of gammaH2AX foci/nucleus
ctrl	AMD	APHidicolin	BRDU	CPT	doxo	ETP	HU	MG132	OxaliPT	Rocs	TPT	IRR	DMSO	IFNg	5FU
2	8	14	1	100	181	9	12	21	8	23	27	19	0	2	1
33	8	38	6	98	22	18	5	21	13	19	29	18	4	5	0
4	2	5	5	25	39	42	16	12	5	2	76	10	1	5	0
6	11	34	4	27	88	123	9	11	13	11	80	21	0	5	1
2	5	27	4	57	40	24	22	1	27	6	49	7	0	5	1
25	7	39	5	73	41	14	10	2	3	12	48	38	1	2	0
12	22	12	17	46	107	61	3	34	2	11	12	9	0	8	0
7	4	28	12	106	43	23	9	7	4	3	90	7	0	7	1
8	21	23	7	16	149	28	4	5	6	42	56	7	0	7	0
13	5	6	2	137	109	31	9	5	6	9	22	7	0	5	0
28	16	24	19	78	51	66	8	29	74	26	24	11	0	8	0
9	10	25	3	147	62	120	93	14	10	5	130	20	1	5	0
34	2	19	3	13	100	24	6	7	11	23	21	6	2	9	0
3	14	10	3	6	41	59	15	37	9	8	117	35	0	3	0
9	3	13	6	43	62	24	11	2	9	19	27	12	0	0	0
3	3	16	3	60	24	108	20	25	8	11	99	2	0	9	0
4	9	3	4	107	55	49	10	0	5	21	23	9	0	31	0
10	13	5	40	8	16	52	7	27	5	16	42	19	0	5	0
4	12	31	10	20	52	65	12	46	6	7	11	10	0	2	2
20	4	15	2	86	71	37	6	6	13	10	88	2	3	5	0
9	2	5	6	39	51	41	10	13	5	22	44	15	0	5	0
7	19	16	2	129	58	54	6	16	10	3	12	8	0	8	0
9	5	6	2	67	47	46	7	20	11	8	22	62	0	7	0
6	9	17	5	22	29	36	6	26	8	4	5	8	0	6	0
9	3	10	18	12	115	27	5	1	3	14	49	160	0	7	0
10	4	16	9	127	87	19	22	26	6	16	12	3	0	2	0
6	12	26	1	132	20	27	3	3	5	22	58	9	1	12	0
15	4	21	5	43	56	46	7	2	9	30	6	51	0	7	0
5	4	11	11	117	100	100	22	1	6	9	2	9	0	5	0
19	0	8	27	18	52	32	5	15	37	9	17	7	0	1	0
11	6	29	2	53	42	23	11	4	3	5	16	16	0	8	0
11	3	21	3	110	17	113	18	1	2	9	16	6	2	7	0
4	5	8	1	101	134	38	14	2	5	15	20	3	0	26	0
0	0	22	6	8	55	18	10	1	7	11	20	10	0	5	0
2	7	20	4	5	21	61	22	0	12	9	1	25	0	6	0
12	3	11	3	89	23	121	8	2	7	8	4	11	0	7	0
17	6	48	14	11	58	44	5	14	11	27	6	96	1	38	0
3	4	5	13	12	7	101	7	7	8	10	16	22	0	16	0
43	3	17	3	111	68	102	8	5	12	2	17	9	0	24	0
32	3	10	5	14	59	107	6	3	6	10	9	3	0	11	0
10	2	19	18	9	92	18	13	9	9	11	12	16	0	9	0
0	1	40	17	83	84	64	9	1	159	16	15	111	0	7	0
7	8	1	11	96	50	37	8	7	4	18	17	22	0	5	2
7	0	5	3	117	77	109	3	1	6	10	17	8	7	2	0
8	2	48	8	16	79	33	15	3	2	8	5	4	0	4	2
13	5	5	2	99	28	25	9	14	6	11	3	8	0	10	0
6	3	24	4	158	34	33	6	1	3	20	29	24	0	8	0
5	7	9	3	19	72	37	3	18	4	8	14	4	0	9	0
11	12	33	4	10	68	26	6	3	5	10	66	6	0	4	1
4	1	7	4	15	13	18	19	15	7	10	20	28	1	0	1
9	6	7	2	19	68	103	5	3	6	13	79	5	0	11	0
3	5	15	11	1	122	34	7	4	7	2	3	11	1	26	1
7	5	20	5	36	47	19	5	3	3	10	9	3	0	9	3
5	19	6	3	8	43	57	10	1	3	15	12	3	0	4	0
10	5	9	12	11	23	52	82	3	3	8	28	7	1	7	1
5	9	9	6	10	53	32	9	3	7	4	34	10	0	10	0
5	9	10	1	79	104	74	4	19	2	6	20	1	1	8	0
0	3	15	3	95	43	22	6	6	3	13	24	20	1	7	0
17	5	11	9	12	63	16	6	4	3	43	51	5	0	2	0
8	13	30	5	8	18	30	48	15	5	39	97	40	1	6	2
34	2	10	7	12	43	22	49	7	5	11	21	5	1	9	0
9	7	15	3	8	18	65	16	1	3	16	27	15	5	10	9
6	2	21	6	7	33	32	4	21	4	10	69	6	0	6	0
7	3	15	9	10	158	37	11	2	8	3	11	4	0	6	2
3	5	4	6	12	90	69	10	5	56	15	38	8	0	9	0
5	11	37	5	24	60	20	6	5	5	18	11	39	0	30	0
8	7	11	2	65	54	27	5	20	9	75	93	3	1	5	2
10	5	5	8	20	46	77	11	36	3	15	21	9	1	16	2
5		15	2	50	67	18	30	3	1	7	37	3	0	21	0
8		7	9	13	49	59	8	12	2	15	10	27	0	4	1
3		4	9	11	21	56	15	7	3	54	23	17	0	6	1
10		22	6	109	19	21	2	2	9	6	18	6	2	11	0
5		4	2	69	35	126	4	13	8	18	15	24	0	3	2
2		6	52	112	45	54	11	5	3	20	24	8	2	5	0
8		7	7	76	29	40	8	12	3	10	18	14	2	2	1
8		7	32	15	52	28	4	12	2	10	74	5	0	3	0
8		14	3	112	29	75	2	26	7	7	12	27	1	7	1
3		21	2	11	29	20	5	8	21	11	49	6	0	4	0
4		11	5	109	49	113	0	1	26	10	16	23	0	3	4
10		10	11	107	82	34	2	12	7	6	25	30	0	19	2
6		54	6	14	24	26	12	10	7	26	13	3	0	4	0
9		12	3	102	38	28	13	2	12	14	102	10	0	5	0
4		12	2	109	10	31	13	4	57	15	39	11	1	31	0
36		46	1	174	58	38	6	9	5	21	62	6	0	21	0
12		12	2	10	46	19	0	8	24	7	30	12	8	30	1
3		18	1	16	45	36	7	0	9	6	35	6	0	25	0
8		22	4	55	46	28	7	11	32	20	51	60	6	25	0
4		7	0	12	46	40	5	1	2	39	11	4	0	5	0
6		17	3	52	102	115	4	1	19	8	11	9	0	2	1
16		10	4	12	66	57	2	2	5	11	18	67	0	3	2
9		34	4	27	77	31	3	4	6	14	12	31	0	3	0
3		24	3	138	35	34	5	5	1	23	6	173	3	24	2
6		6	12	82	75	32	58	1	45	19	6	13	0	20	0
3		21	11	94	33	42	11	3	16	29	3	3	0	27	3
3		9	0	37	13	74	11	20	8	7	31	6	0	2	0
5		15	4	15	33	48	0	4	13	16	22	9	0	17	5
3		18	10	13	77	50	2	0	4	6	34	15	0	5	0
17		9	7	11	51	40	3	1	7	15	15	9	5	10	0
37		27	2	9	65	93	26	5	18	5	52	9	0	12	0
5		22	3	11	145	38	8	15	7	2	48	49	0	8	1
8		11	13	6	39	60	5	2	4	6	19	14	0	9	0
1		13	9	16	73	28	5	0	4	9	88	69	0	5	0
6		30	2	10	37	31	0	2	7	8	24	20	0	2	1
11		34	1	13	55	37	9	0	0	10	14	13	0	3	0
11		11	5	143	57	49	10	21	11	17	21	56	10	10	0
8		16	2	11	16	59	13	20	3	10	24	8	0	5	0
14		22	2	6	84	20	12	1	4	29	18	10	0	0	1
8		32	1	14	44	96	11	2	8	7	18	28	0	4	2
3		35	4	101	109	27	6	10	7	15	6	16	0	2	0
2		18	2	64	103	46	5	3	6	7	53	16	0	1	0
5		14	13	12	120	24	3	1	4	7	58	3	0	0	2
13		35	14	11	40	40	6	3	3	24	28	56	0	2	0
13		22	3	12	47	29	9	1	10	50	76	8	2	11	1
9		30	10	201	39	154	6	29	5	5	9	34	0	9	0
3		13	4	25	85	25	3	27	0	20	11	67	11	22	0
8		9	12	21	25	124	1	7	13	16	41	19	1	1	1
38		8	6	15	39	81	1	5	3	8	21	6	0	14	0
3		17	24	7	32	69	54	2	8	10	21	12	0	24	0
7		19	7	9	84	27	0	8	5	6	37	9	0	3	0
4		7	4	19	85	51	8	0	1	6	13	24	10	4	0
13		10	6	56	58	50	9	22	1	7	19	118	0	3	0
5		17	1	25	39		9	2	5	18	18	12	11	4	2
7		10	9	17	67		54	24	4	11	16	10	1	3	1
15		37	2	20	17		4	6	6	26	12	61	0	19	3
6		19	8	9	38		7	3	20	4		10	0	3	0
7		25	4	96	136		14	13	3	5		12	9	28	0
5		14	6	57	38		14		8	5		10	1	2	9
12		7	8	151	14		2		4	6		11	9	15	0
12		18	5	19	137		6		9	3		16	0	4	0
19		26	4	62	117		5		9	26		7	0	2	2
5		10	5	9			6		5	9		15	19	1	5
4		59	5	8			4		2	3		6	0	2	5
10		31	2	103			4		2	12		52	4	3	0
11		55	6	3			3		21	3		44	0	6	2
7		15	5	11			6		4	7		7	1	4	2
1		31	3	28			5		10	8		112	0	2	3
11		4	9	13			19		1	7		17	0	8	0
10		15	2	16			3		11	8		13	0	5	0
9		22	7	134			2		12	21		20	1	7	0
10		33	2	12			6		4	13		73	0	4	0
3		24	7	11			10		6	5		9	0	54	0
10		38	2	55			5		3	17		1	0	5	2
13		39	4	6			9		8	5		57	0	17	4
8		19	7	34			2		7	13		10	0	6	0
2		19	30	3			8		6	8		5	0	13	3
10		8	6	38			19		5	3		21	0	5	2
10		19	2	51			2		12	27		5	2	45	1
17		14	2	13			0		10	39		7	1	4	0
6		12	8	5			15		39	10		26	0	5	0
5		1	8	9			5		31	11		6	0	8	1
17		29	32	10			8		9	30		37	0	5	0
8		34	5	9			5		2	14		5	0	1	9
6		35	2	2			13		4	10		10	0	4	0
6		37	8	50			1		2	8		6	0	15	0
6		16	12	16			7		4	8		12	0	8	0
17		11	10	9			31		4	6		7	2	17	1
6		17	11	16			36		7	15		7	0	8	1
12		46	9				8		4	22		9	0	7	0
17		17	16				9		12	15		9	6	1	0
9		10	5				2		6	19		20	0	1	0
9		11	3				5		9	30		53	1	5	1
38		32	12				8		36	11		7	0	6	4
7		20	2				4		6	12		9	0	4	1
10		24	22				7		20	16		8	0	10	2
5		37	14				3		5	4		20	1	3	1
13		22	11				3		11	10		13	0	19	1
26		11	6				6		6	4		63	2	28	0
8		51	27				1		11	13		19	0	8	3
19		14	8				1		4	11		6	0	6	1
27		4	2				2		8	9		16	1	5	3
6		7	6				6		12	30		6	0	21	0
11		15	10				3		16	11		13	1	9	0
9		6	10				4		5	15		9	0	4	0
9		7	6				4		14	13		9	0	2	0
12		8	8				2		11	14		8	0	7	2
3			8				3		4	4		5	1	1	0
7			9				2		4	6		8	0	40	4
23			3				1		7	33		6	0	12	2
6			5				1		10	27		9	1	2	1
7			8				1		4	4		12	0	2	0
6			10				4		22	11		21	0	2	0
1			2				0		8	13		5	0	6	17
16			7				6		16	10		17	0	6	2
13			7				1		7	15		7	0	16	0
11			4				2		19	22		11	3	6	0
9			9				3		6	7		14	1	4	0
4			3				2		3	16		38	0	15	0
19			4				2		24	9		83	1	10	0
2			4				3		17	4		9	0	4	2
9			5				6		4	11		22	2	5	1
33			3				1		3	1		17	1	5	2
25			7				2		5	6		6	2	4	0
15			22				2			10		9	13	30	0
12			10				1			41		13	0	2	0
5			4				2			12		22	0	4	5
4			9				5			13		11	0	3	0
9			8				0			6		45	0	4	0
11			5				4			13		11	0	9	1
4			6				2			7		6	4	2	0
8			22				3			8		7	1	3	0
9			7				0			24		8	0	4	2
25			59				3			15		19	0	4	0
26			3				2			17		12	1	13	2
40			13				4			4		14	2	25	0
8			13				3			16		10	1	12	0
18			5				5			16		22	1	4	0
6			13				7			7		19	0	11	0
10			6				2			7		9	2	13	0
13			3				5			6		62	5	13	0
4			14				9			18		156	0	5	0
7			3				3			32		10	0	5	0
5			14				3			21		3	0	12	0
12			13				2			14		12	7	12	0
57			6				5			10		46	0	1	2
8			51				5			19		11	0	5	0
25			25				4			28		8	0	4	3
9			3				2			9		9	0	1	0
18			3				4			10		8	0	3	0
32			7				1			28		9	0	8	0
15			5				5			11		16	0	1	3
4			13				4			7		12	2	4	3
16			23				4			26		11	0	8	0
9			23				3			10		15	1	23	0
8			12				4			4		23	0	5	0
8			16				6			14			0	2	2
14			3				5			3			0	3	2
2			8				4			8			0	16	0
6			14				3			11			6	7	4
5			9				3			15			0	5	0
18			9				3			18			4	7	0
1			6				4			2			0	4	0
3			32				3			10			5	10	0
10			9				4			17			0	9
6			5				8			5			0	8
10			11				3			11			4	7
3			17				4			11			0	11
6			16				4			42			0	10
5			15				5			27			0	10
1			78				9						0	8
1			38				7						0	5
3			9				3						0	5
7			55				9						0	20
2			10				1						1	5
3			18				3						0	5
8			9				1						1	46
2			7				3						0	6
23							6						0	10
3							9						0	10
32							3						0	4
6							5						0	6
3							8						2	8
4							6						0	2
1							3						0	3
4							3						1	32
4							5						0	26
16							1						0	8
3							2						0	5
5							4						1	1
22							6						7	6
23							3						0	7
10							3						0	4
9							4						3	9
9							3						0	11
1							3						0	1
9							15						1	20
3							2						0	9
3													1	26
6													0	11
14													0	6
0													0	3
11													0	16
5													1	3
10													0	4
6													0	8
0													0	8
6													0	3
1													2	5
9													0	13
5													1	16
2													0	5
10													0	4
18													0	6
5													0	1
3													16	5
24													1	2
9													0	17
4													1	11
3													0	15
10													0	5
4													0	20
4													0	3
4													1	4
5													0	6
5													0	14
2													0	38
5													1	30
9													0	17
3													1	7
6													1	5
2													4	5
9														2
8														13
3														6
10														6
8														13
9														15
13														2
5														7
5														9
5														4
4														10
7														16
5														7
31														9
4														5
10														9
8														8
2														4
2														21
4														1
3														5
1														4
4														10
3														22
10														4
23														2
3														7
6														7
8														3
3														4
37														0
1														1
7														7
8														2
3														9
23														6
3														12
6														32
6														17
3
4
19
3
1
2
5
2
7
0
0
1
12
0
0
21
0
0
3
0
1
0
0
6
0
0
0
0
1
0
1
5
1
0
0
2
0
0
0
0
0
0
4
0
4
0
0
0
0

## Sheet: Figure 1_FS 2_part2
number of gammaH2AX foci/nucleus
ctrl DMEM	ctrl DMSO	ctrl HAC	DOXO	CX5461	BMH21 2 uM	Acla 0,05
0	0	0	49	44	1	0
1	0	4	66	46	4	1
2	0	2	47	51	1	0
0	0	0	45	61	2	0
0	0	0	33	9	0	1
0	0	3	60	56	1	1
1	1	1	37	18	2	1
0	0	0	34	38	0	0
0	0	0	27	4	2	1
0	0	0	29	30	16	1
0	1	1	33	7	3	0
0	0	0	49	55	4	3
1	0	0	28	4	1	0
0	0	0	44	14	2	0
0	0	0	33	14	0	0
0	0	0	56	65	6	1
0	0	0	16	6	0	0
1	0	0	20	87	2	1
1	0	1	41	16	9	1
0	0	0	46	73	2	0
0	0	0	18	16	1	1
0	0	0	25	55	2	0
0	0	6	1	61	0	1
1	1	0	36	15	3	0
0	0	0	16	4	13	0
0	0	8	29	4	3	0
0	0	0	22	63	2	0
1	0	0	21	10	3	0
0	1	0	31	53	0	0
0	0	0	43	66	2	1
0	0	0	2	12	24	0
0	0	0	2	8	6	2
0	0	1	17	19	13	2
0	0	0	0	5	0	2
1	0	2	61	10	3	0
0	0	0	0	16	2	0
0	0	0	0	13	1	1
0	0	0	0	19	2	0
0	0	0	0	11	21	0
0	0	3	42	15	2	0
3	0	1	33	57	2	1
0	1	0	14	14	0	1
0	0	0	25	15	1	1
7	1	1	27	11	0	1
0	0	0	1	58	3	1
1	0	2	38	14	5	0
0	0	0	15	80	2	0
0	0	0	36	57	2	3
0	0	1	23	18	4	0
0	0	0	50	11	1	0
0	0	0	11	53	3	0
0	3	0	38	8	1	0
0	2	0	24	68	8	0
0	0	1	24	17	2	2
1	0	0	24	65	0	0
0	0	17	28	57	2	0
0	0	1	2	3	3	1
0	0	0	26	60	0	0
0	0	0	36	45	3	0
0	1	0	33	53	1	0
0	0	0	31	3	3	0
0	0	0	56	13	0	0
0	0	0	45	42	2	0
2	2	0	30	3	2	1
0	0	0	21	0	5	1
0	0	0	25	8	9	0
0	0	0	60	13	30	0
0	0	0	32	2	0	2
0	0	2	53	61	2	1
0	0	0	25	15	0	0
0	0	5	34	17	1	0
1	0	0	22	20	2	1
0	2	0	23	23	0	0
0	0	1	24	6	10	0
1	1	0	57	8	2	0
0	0	1	33	8	0	1
0	0	2	18	15	3	0
0	0	4	49	57	4	0
0	0	0	43	12	3	1
0	0	0	35	21	5	2
0	1	0	70	11	5	0
0	0	1	59	6	0	0
0	0	0	46	69	1	2
0	0	1	31	48	2	0
0	0	0	21	3	2	2
0	0	1	54	7	3	0
0	0	0	52	70	2	1
0	0	2	43	18	1	3
0	0	0	14	13	4	0
0	0	0	8	8	3	0
0	0	0	42	11	4	1
1	0	3	23	58	2	0
1	0	0	25	5	1	1
0	0	0	25	63	2	0
0	0	2	28	5	2	0
0	0	0	8	12	4	0
0	0	0	7	9	0	0
0	0	1	14	12	1	0
0	1	0	25	10	4	0
0	0	0	57	12	1	0
0	2	0	20	10	0	0
0	0	0	49	40	0	0
1	0	3	27	44	17	1
4	0	0	40	9	0	1
0	0	1	37	8	0	0
0	0	0	39	7	5	0
0	0	0	37	10	0	0
0	0	0	19	49	0	1
1	0	0	57	12	3	1
2	0	0	83	10	0	0
0	0	2	32	63	0	0
1	0	0	30	8	4	3
0	0	9	50	6	3	0
0	1	2	24	10	0	0
0	0	0	77	3	15	0
0	0	1	31	78	4	0
0	0	5	46	11	5	0
0	0	0	23	55	4	0
0	0	1	15	6	2	0
0	0	0	27	8	1	0
4	0	0	26	82	0	0
0	0	0	12	5	1	5
0	0	0	56	5	5	2
0	0	5	50	7	2	2
0	0	0	24	22	2	1
1	0	0	40	32	2	1
0	0	0	24	19	1	1
0	0	0	27	10	2	0
0	0	1	53	72	0	0
0	0	0	31	62	2	0
3	0	0	46	41	1	1
0	0	0	31	11	4	0
0	0	0	56	57	2	0
0	0	0	51	49	3	0
2	0	0	22	3	0	0
0	0	0	64	21	32	0
0	0	0	70	4	2	0
0	0	1	43	25	0	3
0	1	0	40	52	0	0
0	0	0	0	9	1	2
0	1	0	24	6	3	6
0	0	23	45	13	3	1
0	0	0	46	8	3	1
0	0	10	43	58	3	0
0	0	2	31	4	2	0
0	0	0	39	5	0	0
0	0	0	22	9	0	2
0	0	0	32	8	0	0
2	0	0	24	12	0	0
0	0	2	60	12	0	0
0	0	1	57	10	0	0
0	0	0	31	54	4	4
0	0	3	27	4	5	1
0	0	0	20	3	2	0
0	0	0	77	22	6	0
0	0	0	35	8	15	0
0	0	0	29	11	4	0
0	0	0	51	33	0	16
0	0	1	33	11	0	0
1	0	1	33	10	1	0
0	0	0	58	95	0	0
0	1	0	29	7	4	0
6	0	0	42	3	1	0
0	0	0	34	8	2	0
0	0	2	50	35	1	2
4	0	2	31	5	0	1
0	0	3	58	51	0	3
0	0	1	31	8	2	2
0	0	1	15	17	0	0
0	2	0	10	58	2	0
0	0	0	6	7	1	0
0	0	2	16	36	3	0
0	0	16	17	55	1	0
0	0	1	13	37	2	0
0	0	0	19	63	0	0
0	0	0	26	19	3	0
3	0	0	20	55	1	0
0	0	0	47	13	0	1
1	0	3	66	12	0	0
0	0	0	32	24	4	0
0	2	0	35	15	2	0
0	1	0	32	50	3	0
1	0	0	42	13	1	0
0	0	0	25	60	1	0
0	1	1	36	6	4	0
0	0	0	24	9	1	0
0	0	0	36	9	3	0
0	0	0	22	64	1	0
0	0	0	77	3	0	2
1	0	0	41	11	15	0
0	0	0	22	6	3	5
0	0	0	6	12	1	0
0	0	0	17	47	1	0
0	0	0	41	25	21	0
0	0	0	22	22	2	0
0	0	2	50	5	1	0
0	0	2	25	2	2	1
0	0	0	61	26	9	0
0	0	1	0	10	1	0
0	0	5	62	11	3	0
0	0	0	3	6	4	0
3	0	2	21	58	0	0
1	2	0	32	2	1	0
0	0	0	34	11	0	0
0	0	0	18	7	0	1
0	1	1	31	5	2	0
0	5	0	4	32	2	0
0	0	3	8	4	0	0
0	0	0	41	60	0	0
0	0	4	29	12	1	0
1	0	1	9	5	3	0
2	0	1	43	12	0	0
0	0	0	37	51	3	0
0	0	2	19	35	0	0
1	0	20	12	24	0	2
0	0	0	30	3	2	0
0	0	0	15	58	0	2
0	0	0	18	12	0	3
0	0	3	32	36	0	0
0	0	0	24	4	3	1
0	0	0	50	5	18	0
1	0	0	12	48	3	0
0	0	0	41	18	0	2
2	0	2	40	52	7	1
0	0	0	29	0	4	0
1	0	1	20	14	2	0
0	0	1	21	5	0	0
0	0	0	22	13	6	0
0	0	0	51	9	3	2
0	0	1	20	19	0	0
3	0	1	24	17	3	0
1	0	0	37	13	0	0
2	0	0	26	49	0	36
1	0	0	34	7	2	1
0	0	0	14	9	1	0
0	0	0	25	30	1	0
0	0	0	62	21	0	1
0	0	0	31	10	0	0
2	0	0	28	60	1	0
0	0	5	31	51	0	0
3	0	0	36	14	1	0
0	0	0	21	24	0	0
0	1	0	23	54	1	1
0	0	0	20	49	4	2
0	0	0	28	1	1	0
0	0	0	59	12	5	1
0	0	0	38	57	5	0
0	0	0	47	8	2	0
1	0	0	33	66	2	0
0	0	0	23	9	0	0
4	0	1	72	12	6	1
0	0	0	37	1	1	0
1	0	2	20	22	1	0
0	0	0	30	3	0	0
0	0	0	29	9	0	1
0	0	1	24	61	0	0
0	0	0	29	9	1	2
0	1	2	51	7	0	0
0	0	0	29	13	0	0
0	0	2	64	5	4	0
0	0	0	56	7	1	0
0	0	0	39	6	4	2
0	0	0	29	19	2	0
0	0	0	44	8	1	0
3	0	0	32	8	4	0
0	0	0	37	6	2	0
0	0	0	46	4	1	1
1	0	0	20	66	1	0
0	0	2	42	16	5	0
0	0	0	25	5	0	0
0	0	1	38	62	0	1
0	0	0	23	10	2	0
0	0	0	27	55	2	0
2	0	0	46	14	0	0
0	0	1	69	7	1	0
1	0	0	46	4	4	0
0	0	2	26	4	3	0
0	0	0	26	6		1
0	0	1	35	3		0
0	0	0	58	16		0
0	0	0	30	6		3
0	3	1	33	4		0
0	0	0	31	21		3
0	0	0	24	50		2
0	0	2	31	55		0
1	0	0	27	9		4
0	0	0	18	7		0
4	0	0	55	12		1
0	0	0	57	8		0
1	2	0	68	17		2
0	0	0	55	9		0
0	1	0	69	6		1
3	0	0	26	10		8
2	0	7	69	4		1
0	0	2	16	30		2
0	1	0	24	4		3
2	0	0	44	59		0
1	0	0	52	51		3
0	0	0	52	5		1
0	0	0	33	20		0
0	0	0	24	46		0
0	0	0	51	8		0
0	6	0	54	11		0
0	0	0	33	46		0
1	0	0	33	5		1
0	0	0	41	3		0
0	0	2	30	12		0
0	0	0	11	6		0
1	0	1	66	12		1
0	0	2	23	20		0
0	0	0	11	52		0
0	1	0	19	39		0
0	0	0	22	13		5
0	0	0	33	10		0
1	0	0	22	8		0
0	0	0	33	7		1
1	0	0	45	9		0
0	0	1	41	57		1
0	0	0	8	10		0
0	0	6	31	9		0
0	0	0	51	7		1
0	0	1	18	61		0
1	0	0	42	7		4
0	2	0	48	11		0
0	0	0	31	66		0
1	0	0	30	14		0
0	0	0	39	23		0
0	0	0	69	5		0
0	0	0	33	7		1
0	0	1	21	40		0
0	0	0	24	56		1
0	0	0	67	7		0
0	1	1	12	11		0
0	0	2	38	24		0
4	0	1	39	11		0
0	0	0	30	48		0
5	0	0	49	74		0
0	0	0	53	16		0
2	0	0	25	8		0
0	0	0	32	65		0
0	0	2	51	51		0
16	0	0	60	45		0
0	0	0	44	5		0
0	0	0	36	10		0
0	0	0	38	8		0
0	0	0	32	11		0
0	5	0	40	6		4
0	0	0	19	14		0
0	0	0	26	12		0
0	0	0	37	9		4
0	0	0	30	72		0
0	0	0	35	43		0
0	0	0	62	66		0
0	0	0	9	53		0
0	0	1	62	13		0
0	0	0	29	7		0
0	0	1	22	15		2
0	0	0	32	6		4
0	1	2	33	11		0
0	0	0	61	55		2
0	1	1	26	4		0
0	0	0	32	13		0
0	0	0	58	16		0
0	0	0	36	72		1
3	0	0		2		0
0	0	1		9		0
0	0	0		9		0
0	0	0		10		0
0	1	0		11		1
1	0	1		9		0
0	0	0		7		1
0	0	0		3		0
0	0	0		53		0
0	0	2		46		0
0	0	0		29		0
0	0	0		72		0
0	0	0		8		0
0	0	0		64		1
0	0	0		10		1
0	2	1		47		1
0	0	2		44		0
0	0	0		14		0
0	0	0		6		1
0	0	0		10		2
0	1	0		11		0
0	0	0		4		7
0	0	0		64		1
0	0	0		52		1
0	0	1		16		0
0	0	14		14		0
1	0	2		28		0
0	0	0		17		0
0	0	0		65		0
1	0	0		10		0
0	0	0		7		1
0	0	0		46		6
1	1	0		8		2
0	1	0		34		3
0	1	2		48		0
0	0	1		49		0
0	0	0		9		0
1	0	6		72		0
0	0	3		59		1
0	0	0		9		3
0	5	0		4		0
1	0	0		57		3
0	0	0		5		0
0	0	1		10		0
1	0	0		8		4
0	0	0		5		0
0	0	0		52		1
0	0	1		9		1
0	0	0		11		0
0	0	0		2		1
3	0	0		9		0
0	0	0		14		0
7	1	0		68		0
5	0	3		7		3
0	0	0		17		0
0	0	1		11		0
0	0	0		5		0
0	0	0		14		2
0	0	0		64		4
0	0	0		47		0
1	0	0		3		0
0	0	0		8		0
0	0	0		9		0
1	0	0		5		3
0	0	0		6		0
0	0	0		9		1
3	0	5		16		0
0	0	0		7		1
1	0	1		16		0
0	1	3		37		0
0	1	0		9		1
1	0	0		10		1
1	0	0		11		1
1	0	0		5		1
0	0	2		13		0
0	0	6		50		1
0	0	1		7		0
0	1	0		4		1
0	1	0		11		0
4	2	2		4		1
0	1	0		56		0
0	0	2		4		0
0	0	0		16		0
1	0	0		13		0
1	0	2		6		1
2	0	0		11		1
0	1	3		13		1
0	0	2		7		1
1	2	0		15		0
0	0	0		7		1
0	0	1		12		0
0	0	2		12		0
0	0	0		77		2
0	0	0				0
0	0	0				0
0	0	0				0
0	0	1				0
0	0	0				3
0	1	0				0
0	0	0				0
0	0	5				0
0	0	0				0
0	0	2				0
0	0	0				1
0	0	0				0
0	0	0				0
4	0	0				0
4	1	0				1
2	1	0				1
3	0	1				1
0	0	1				3
0	1	1				0
0	0	4				0
2	0	0				0
1	0	0				0
0	0	0				0
0	0	1				0
0	0	0				0
0	0	5				3
0	0	21				0
0	0	1				0
2	0	8				1
0	0	3				0
0	0	4				0
1	0	1
0	0	1
0	0	0
1	0	2
1	0	1
0	0	3
0	0	0
0	0	0
0	0	1
0	0	0
0	0	11
0	0	0
0	0	2
0	0	1
3	0	0
0	0	0
0	0	8
0	0	0
0	0	0
0	0	0
0	0	0
0	1	1
0	1	0
4	0	0
0	0	2
0	0	1
0	0	0
0	0	1
0	0	0
0	0	0
3	0	1
1	3	0
0	0	3
2	0	0
0	0	0
0	0	0
0	3	0
0	0	0
0	0	0
1	4	0
0	0	0
0	0	0
0	0	4
0	0	2
0	0	1
2	0	0
0	0	1
0	1	5
0	0	0
0	0	0
0	0	0
0	0	0
5	0	0
0	0	0
1	0	2
0	1	0
3	0	0
0	2	0
0	0	0
0	0	5
1	0	0
1	0	0
3	0	0
0	0	0
0	1	1
0	0	0
0	0	0
7	1	1
0	0	1
0	2	0
0	1	3
0	0	0
0	0	1
1	0	0
0	0	0
0	0	0
0	0	0
0	0	0
0	4	0
0	0	0
0	0	0
0	0	0
0	0	0
0	0	0
0	0	1
1	0	0
0	1	0
0	0	0
0	0	0
0	0	0
1	0	0
0	0	0
0	0	0
0	0	0
0	0	1
0	1	0
0	0	0
0	0	0
0	0	0
1	0	0
0	0	0
1	1	0
0	0	0
0	2	4
0	0	1
0	0	0
0	0	5
0	0	13
0	0	2
0	0	0
0	0	0
0	0	0
0	0	0
0	1	0
0	0	4
0	0	0
0	0	0
0	0	8
3	0	2
0	0	0
1	1	8
0	0	0
0	0	0
0	0	1
6	0	0
0	0	1
2	0	0
0	0	0
0	0	0
1	0	0
0	0	0
0	0	0
0	0	2
0	0	0
3	0	1
0	0	1
1	0	0
0	0	0
0	0	0
0	0	2
0	2	0
0	0	1
0	8	2
0	0	0
0	0	0
4	0	1
0	0	2
1	0	1
0	0	4
1	1	0
0	0	1
0	0	1
0	0	0
0	0	2
0	0	0
0	1	2
0	0	0
0	0	0
0	0	13
0	1	3
1	0	3
0	0	1
1	0	0
0	1	0
0	1	1
0	0	0
0	1	0
3	0	0
1	4	3
0	0	2
2	0	0
0	4	0
0	2	0
0	0	0
0	0	0
0	0	0
0	0	0
0	0	3
1	6	0
0	0	0
0	0	0
0	0	0
0	0	0
0	0	1
0	0	1
0	0	1
1	0	0
0	0	0
0	1	0
0	0	1
0	1	2
0	0	1
1	0	0
0	0	2
0	0	0
1	0	8
0	0	0
0	0	0
0	3	0
0	1	2
5	0	0
0	0	0
0	1	0
0	0	0
0	1	10
1	0	0
0	0	0
1	0	0
0	0	0
0	0	3
0	0	1
0	2	0
0	0	1
0	0	0
0	0	0
0	0	1
0	0	0
0	0	0
6	0	1
0	0	2
0	0	0
3	0	0
0	0	0
1	1	0
0	0	0
0	0	0
0	0	0
0	0	0
0	1	1
0	0	1
0	0	1
0	0	1
3	0	0
0	0	1
0	0	0
0	0	0
0	1	0
0	0	2
0	0	0
0	0	0
0	0	1
0	0	0
0	0	0
0	1	1
0	6	0
0	4	2
0	0	0
0	0	0
0	4	1
0	0	0
0	0	0
1	0	0
0	0	1
0	0	2
0	0	0
0	0	0
0	0	0
1	1	1
0	0	0
1	0	1
0	0	2
1	0	0
0	0	0
0	0	6
0	0	3
0	0	0
2	0	1
0	0	0
1	0	0
0	1	0
0	0	0
0	0	0
0	0	0
1	0	1
0	0	0
0	0	1
0	0	0
0	0	0
0	0	0
0	0	1
0	0	0
1	0	0
2	0	0
0	0	0
0	0	0
0	0	0
1	0	1
0	0	0
0	0	0
1	0	1
1	0	0
0	0	0
13	0	3
0	2	0
0	0	12
3	0	0
0	0	1
0	0	0
10	0	0
0	0	0
1	0	0
0	0	5
0	0	0
1	0	0
0	0	0
0	0	0
0	0	0
0	0	0
0	0	0
0	0	0
0	0	1
0	0	0
0	0	0
1	0	0
0	0	0
0	1	1
0	4	0
0	0	0
0	0	0
2	0	0
0	0	0
0	0	0
0	0	0
0	1	0
0	1	1
0	0	0
4	0	0
0	0	0
0	0	0
0	0	0
0	0	1
0	0	1
0	0	0
1	0	3
2	0	0
1	0	0
0	0	0
0	0	0
1	1	0
0	0	0
2	0	0
7	0	0
0	0	0
0	0	0
2	0	0
0	0	0
0	0	0
0	0
0	1
4	1
0	0
0	0
1	0
1	0
0	0
0	0
1	0
1	0
0	1
0	0
0	0
0	0
0	0
0	0
1	0
0	0
0	0
0	0
0	0
3	0
0	0
1	0
0	0
0	0
2	0
0	0
4	1
2	0
1	0
0	0
0	1
0	0
3	0
0	0
0	0
0	0
2	2
0	0
0	0
0	0
0	0
0	0
0	0
3	0
0	0
1	0
0	0
0	0
0	0
0	0
1	0
0	0
1	0
0	0
0	0
0	0
4	0
0	3
0	0
0	0
0	0
1	1
0	0
0	0
0	0
0	0
3	0
0	0
0	0
0	0
1	0
0	1
0	0
0	0
0	0
0	0
0	0
1	0
8	0
0	0
0	0
1	0
5	0
6	0
0	0
0	0
5	0
0	0
1	0
1	1
0	1
2	0
1	0
1	1
2	0
0	0
3	0
1	1
0	0
0	0
0	0
0	0
0	0
0	1
0	0
0	0
0	0
0	0
0	1
0	0
0	0
0	0
0	0
0	0
0	0
0	0
0	0
0	0
1	0
0	0
0	0
1	2
0	0
0	0
0	0
1	0
1	0
0	0
0	0
1	0
0	0
0	0
0	0
0	0
0	0
0	1
0	0
0	0
1	0
0	0
0	0
2	0
0	0
0	0
0	0
2	0
0	0
0	2
0	0
0	0
0	0
0	0
0	0
1	0
0	1
0	1
1	0
0	0
0	0
0	0
1	0
0	0
1	0
0	0
0	0
1	0
0	0
2	0
1	0
0	0
1	0
0	0
0	0
1	0
5	0
0	0
2	0
0	0
0	0
0	0
2	0
0	0
0	4
0	0
0	0
0	0
0	0
1	0
0	0
1	1
0	0
0	0
0	0
4	0
0	0
0	0
0	0
1	0
0	0
0	0
0	0
2	0
3	4
0	0
8	0
0	2
0	0
0	0
3	0
0	0
2	1
2	0
0	0
0	0
0	0
0	1
0	0
1	0
6	0
0	0
1	0
0	1
1	0
2	0
0	0
0	1
1	0
0	0
7	0
0	0
5	0
1	0
0	0
1	0
0	3
3	0
0	0
1	0
0	0
0	0
0	0
0	2
3	0
0	1
0	0
0	0
1	0
1	0
0	1
0	1
1	2
0	2
0	2
1	0
0	0
0	0
0	0
1	0
0	1
0	0
0	0
0	1
0	0
1	0
0	0
0	0
0	0
0	1
0	0
0	0
0	0
0	0
1	4
1	0
0	0
1	1
0	0
0	0
0	0
0	0
0	0
0	2
0	0
0	0
0	0
0	0
0	0
0	0
0	1
0	1
0	0
2	0
0	7
0	0
0	1
0	0
0	0
0	0
0	0
0	4
0	0
3	0
0	0
5	0
0	0
2	0
0	0
0	0
0	1
0	0
0	0
0	0
0	0
6	1
0	0
0	0
0	0
0	0
0	0
0	0
0	0
0	0
0	0
0	0
1	0
0	0
0	0
2	0
0	0
0	0
0	0
0	0
0	0
0	0
4	0
0	0
0	0
0	0
0	0
0	1
0	0
1	0
4	0
3	1
0	0
0	0
0	0
2	0
0	0
0	2
0	0
1	0
0	0
0	0
4	0
0	0
0	0
0	0
0	0
2	0
0	1
0	0
0	2
0	0
0	0
0	0
0	0
0	0
1	0
2	2
0	0
0	1
0	0
2	0
0	0
0	0
0	0
2	0
0	0
0	0
1	0
9	0
1	0
0	0
0	0
0	0
0	0
0	0
0	0
0	1
0	0
0	0
0	0
3	0
0	0
0	0
0	0
0	0
0	0
1	0
1	0
0	0
0	0
0	0
0	0
0	0
0	0
0	0
0	0
2	0
0	0
0	0
0	0
1	0
0	0
0	0
0	0
1	0
0	0
0	0
0	0
0	0
3	0
0	0
3	0
0	0
1	0
0	0
0	0
0	0
1	0
0	0
0	0
0	0
0	0
0	0
1	0
0	0
0	0
0	1
0	2
0	0
0	0
2	0
0	0
0	0
0	0
0	0
0	0
1	0
0	0
1	0
0	0
0	0
0	2
0	0
0	0
0	0
0	0
2	0
0	0
2	0
1	0
0	2
0	1
0	0
0	0
0	0
0	0
0	0
0	1
0	0
0	1
0	1
0	0
0	0
0	0
0	0
0	0
0	1
0	0
0	0
0	0
0	0
12	0
0	9
1	0
1	0
0	0
0	0
0	0
3	0
2	0
1	1
1	0
0	0
0	0
0	0
0	1
1	0
1	0
0	0
0	0
0	0
0	0
1	0
0	0
0	0
0	0
0	0
0	0
0	0
0	0
2	1
2	0
0	0
0	0
0	3
1	0
0	0
0	0
0	0
1	0
0	0
0	0
0	0
0	0
0	0
0	0
2	0
0	0
1	0
0	0
1	0
0	0
1	2
0	0
0	0
1	1
0	0
1	0
0	0
0	0
0	0
0	1
1	0
0	0
0	0
0	0
3	0
0	0
0	0
0	0
0	0
1	0
1	0
1	1
0	0
1	0
0	0
0	0
0	0
0	0
0	0
0	2
0	0
0	0
0	0
1	2
0	0
0	0
0	0
0	0
4	0
0	1
0	0
0	0
0	0
2	0
0	0
0	0
6	0
0	0
0	0
0	0
0	0
0	1
2	8
0	0
0	0
0	0
0	0
0	0
0	0
0	0
1	4
0	0
0	0
0	2
0	0
0	0
1	0
0	0
0	0
1	0
0	1
0	0
0	0
0	0
0	1
1	0
1	2
2	0
0	0
0	1
0	0
0	0
0	0
0	0
0	1
3	0
0	0
0	0
1	2
1	3
0	0
0	3
12	0
0	0
0	0
0	0
0	0
1	0
0	0
0	0
0	0
0	0
4	0
0	13
0	2
7	0
6	0
0	0
0	0
0	0
7	0
0	0
1	0
1	4
0	3
1	0
0	0
0	0
0	0
0	0
2	0
1	0
0	0
0	0
0	0
0	0
0	0
0	0
0	0
0	2
0	0
3	0
0	0
1	0
0	0
0	0
3	0
0	0
0	2
0	0
1	0
0	0
0	0
1	0
0	0
0	0
0	0
0	0
0	1
1	0
1	0
0	0
2	0
0	0
0	0
0	0
0	0
1	0
0	0
0	0
0	0
1	0
0	0
0	0
0	0
0	0
0	0
0	0
0	0
0	0
0	0
2	0
1	0
0	0
0	0
0	0
0	0
0	0
0	0
0	3
0	0
0	0
0	0
0	0
1	0
0	0
0	0
0	0
0	0
0	0
3	0
0	0
0	0
0	0
0	0
0	0
4	0
0	2
2	0
0	0
1	0
0	0
0	0
5	1
0	4
0	0
0	0
0	0
0	0
0	0
0	0
0	0
0	0
0	0
0	1
1	0
4	0
0	1
2	1
0	0
0	1
0	0
3	0
0	0
1	1
3	0
0	0
0	2
0	0
0	1
1	0
0	1
4	0
0	0
0	1
0	0
0	3
2	0
0	2
0	0
0	0
0	0
0	0
1	0
0	1
3	0
0	0
0	1
0	0
0	1
0	0
1	0
0	0
0	1
0	0
9	4
0	1
1	0
0	0
0	0
0	0
0	0
1	0
3	0
0	1
0	1
0	0
0	0
0	1
1	0
0	0
0	0
0	0
0	0
1	0
0	0
0	0
0	0
17	0
1	1
0	0
0	0
0	0
0	0
1	0
0	0
0	0
0	0
2	2
0	0
0	0
1	0
1	0
0	0
0	0
0	1
0	0
0	0
0	1
1	0
0	0
0	0
1	2
0	0
0	8
0	0
0	0
0	0
1	0
0	0
0	0
1	0
2	0
0	0
0	0
0	0
2	0
4	0
1	0
0	0
0	0
1	0
0	0
0	0
0	0
1	0
0	1
4	2
1	0
0	0
0	0
0	2
2	0
0	0
3	0
0	0
1	1
0	3
1	0
2	0
0	0
0	0
0	0
0	0
1	0
0	0
0	1
0	0
0	0
0	0
0	0
0	0
0	0
0	0
0	0
0	0
0	0
1	0
1	0
0	0
0	0
1	1
0	0
0	0
0	0
0	0
3	0
0	0
1	0
1	2
3	0
0	0
0	1
0	0
0	0
1	0
0	0
0	1
0	0
0	0
0	0
0	0
1	1
0	0
0	0
0	0
0	0
0	2
0	0
0	1
1	0
0	0
0	0
0	1
1	0
0	0
0	0
0	0
0	3
0	0
0	0
0	0
0	0
0	0
0	0
0	0
0	0
0	0
0	0
0	0
0	0
1	0
1	1
1	0
1	0
0	0
0	0
0	2
0	0
0	0
0	0
0	0
0	0
0	0
0	0
2	2
0	0
0	0
0	0
1	0
0	0
0	1
0	4
0	0
1	1
0	0
3	0
1	0
0	0
1	0
0	0
0	0
0	1
0	0
1	0
0	0
0	0
0	0
0	0
0	0
0	0
0	0
0	0
2	1
2	0
1	0
1	0
0	0
0	0
0	0
0	0
0	0
0	0
0	0
0	0
0	0
1	0
0	0
5	0
0	4
1	0
0	0
0	0
0	0
0	0
0	0
0	0
2	1
0	0
0	0
0	0
2	0
1	1
0	0
0	0
0	0
0	0
1	0
7	0
0	0
0	0
0	0
0	0
0	0
0	0
0	0
0	0
0	0
2	0
0	0
1	2
0	0
3	1
0	0
0	0
0	0
0	0
0	0
1	0
0	0
0	4
2	0
0	0
0	0
1	0
0	0
2	0
1	0
0	0
0	0
0	0
0	0
0	0
0	0
0	0
0	0
1	0
0	0
0	0
0	2
0	0
0	0
0	0
1	0
1	0
0	0
1	0
0	0
0	0
0	0
1	0
1	2
0	0
0	0
1	0
0	0
0	0
0	0
1	0
1	0
0	0
1	0
0	2
0	0
2	0
0	0
0	2
0	2
1	0
0	0
0	0
0	0
0	0
2	1
1	4
0	4
0	1
0	0
0	0
0	0
3	0
5	0
0	0
0	0
1	0
0	0
0	0
0	0
0	0
0	0
0	0
0	0
0	1
1	0
1	3
0	0
0	0
0
0
0
1
0
1
0
0
3
1
1
0
1
2
0
0
0
0
0
0
0
0
2
0
0
1
0
1
0
0
0
0
0
0
0
0
2
1
[truncated: 261 more rows]
