# Supplementary material for: Topological stress triggers persistent DNA lesions in ribosomal DNA with ensuing formation of PML-nucleolar compartment
Source: eLife. 2024 Oct 10;12:RP91304. doi: 10.7554/eLife.91304 (PMC11466457; doi:10.7554/eLife.91304)
Supplement: Figure 1—figure supplement 4—source data 3. [file elife-91304-fig1-figsupp4-data3.xlsx]

## Sheet: Figure 1_FS 4-A
	bowls								funnels								baloons								PML NDS
biological replicates:	I	II	III	IV	V	VI	VII	VIII	I	II	III	IV	V	VI	VII	VIII	I	II	III	IV	V	VI	VII	VIII	I	II	III	IV	V	VI	VII	VIII
doxo 2d	56.5217	40	9.52381	38.0952	36.8421	61.1111	48.7805	54.902	21.7391	20	61.9048	38.0952	49.4737	16.6667	46.3415	35.2941	4.34783	40	28.5714	23.8095	10.5263	0	0	9.80392	17.3913	0	0	0	3.15789	22.2222	4.87805	0
BMH21 2d	67.5676	54.8387							21.6216	35.4839							10.8108	9.67742							0	0
cpt 50	46.1538	66.6667	33.3333	32.1429	25				7.69231	0	0	17.8571	16.6667				38.4615	16.6667	44.4444	46.4286	54.1667				7.69231	16.6667	22.2222	3.57143	4.16667
TPT 50	46.1538	36.8421	33.3333	38.4615	50				15.3846	0	6.66667	15.3846	14.2857				38.4615	57.8947	46.6667	38.4615	21.4286				0	5.26316	13.3333	7.69231	14.2857
Acla 0,05	68.421	76.9231	87.5	92.3077	73.0769				21.0526	7.69231	8.33333	0	19.2308				0	0	0	0	0				10.5263	15.3846	4.16667	7.69231	7.69231
OxlPt	42.8571	20.9302							21.4286	27.907							28.5714	48.8372							7.14286	2.32558
AMD 10nM	14.2857	75	100	66.6667	55.5556	88.8889			28.5714	25	0	16.6667	27.7778	11.1111			57.1429	0	0	16.6667	16.6667	0			0	0	0	0	0	0
ETP 50	0	0	0						0	0	0						0	0	0						100	100	100
CX5461	12.5	0	0						0	0	0						0	0	0						87.5	100	100

## Sheet: Figure 1_FS 4-B
	bowls funnels baloonns					PML NDS
biological replicates:	I	II	III	IV	V	I	II	III	IV	V
CPT 0.5	0	0	2.05761	0	0	0.27027	0	2.46914	0.208768	0
CPT 5	1.22449	1.79211	0			2.04082	6.45161	0
CPT 50	9.40171	5.66038	7.59494	23.0179	30.9469	1.7094	1.88679	3.7037	0	0.230947
TPT 0.5	0	0	0	0	0	0	1.20482	1.40187	1.14286	0.222717
TPT 5	1.89394	4.62634	0			7.19697	7.47331	8.13954
TPT 50	6.51341	9.65517	13.5484	17.8182	13.9423	2.68199	0.689655	2.58065	0	0.240385
ETO 0.5	0	0	0			0	0	2.53165
ETO 5	0	0	0			1.6129	0.983607	1.55039
ETO 50	2.18978	0	0			1.82482	5.69948	0

## Sheet: Figure 1_FS 4-G
	bowls-Funnels balloons		PML NDS
biological replicates:	I	II	I	II
2d esiTOP1	0	0	27.8125	30
3d esiTOP1	3.11203	0.47619	10.3734	23.8095
6d esiTOP1	13.3047	3.41463	25.3219	33.6585
