# Supplementary material for: Topological stress triggers persistent DNA lesions in ribosomal DNA with ensuing formation of PML-nucleolar compartment
Source: eLife. 2024 Oct 10;12:RP91304. doi: 10.7554/eLife.91304 (PMC11466457; doi:10.7554/eLife.91304)
Supplement: Figure 1—source data 1. [file elife-91304-fig1-data1.xlsx]

## Sheet: Figure1B
	% nuclei with PNAs														mock for CX5461	mock
biologial replicate	doxorubicin	BMH-21	camptothecin	topotecan	aclarubicin	oxaliplatin	actinomycin D	etoposide	CX-5461	IR_10 Gy	BrdU	aphidicolin	5-FU	MG-132	acetic acid	DMSO	hydroxyurea	IFNg	roscovitine	CTRL
I	21.2	18.8	11	10.1	4	11.6	12	4	3.9	1.1	0.9	0.4	0.3	0	0	0	0	0	0	0
II	24.2	21	8	17.8	5	12.1	5	6	1	0	0	0.2	0	0	0	0	0	0	0	0
III	15		10	14.2	19		6	4	6.2						0	0				0
IV	21		23	14.8	7		3									0				0
V	19		31.2	10.5	27		3.8									0				0
VI	39			9			2.9													0
VII	35			10			12													0
VIII	11			16			7													0
IX	21						3													0
X	25						7													0

## Sheet: Figure 1D
% nuclei with PNAs
biological replicates	esiTop1_3d	esiTop1_6d	esiTop2_3d	esiTOP2A 6d	esiTOP1 2d	esiTOP2A 2d
old I	31		12
149-I	13.4855	38.6266	6.66667	4	27.8125	7.71208
149 II	24.2857	37.0732	10.3286	5.52995	30	6.31068

## Sheet: Figure 1E
% nuclei with PNAs
biological replicates		PML-NDS	bowls funnels balloons
I	doxo(0.375)	2	0
I	AMD-->doxo(0.375)	1	11
II	doxo(0.375)	3.5	0
II	AMD-->doxo(0.375)	0	14
III	doxo(0.375)	2	1
III	AMD-->doxo(0.375)	0	28
biological replicates		PML-NDS	bowls funnels balloons
I	doxo(0.375)	1	2
I	CX5461-->doxo(0.375)	0	27
I	doxo(0.75)	5	20
I	CX5461-->doxo(0.75)	0	26
biological replicates	AMD	esiTop1	AMD--> esiTop1
I	12	9	51
II	3	21	34
III	7	11	28
