# Supplementary material for: Topological stress triggers persistent DNA lesions in ribosomal DNA with ensuing formation of PML-nucleolar compartment
Source: eLife. 2024 Oct 10;12:RP91304. doi: 10.7554/eLife.91304 (PMC11466457; doi:10.7554/eLife.91304)
Supplement: Figure 2—figure supplement 1—source data 1. [file elife-91304-fig2-figsupp1-data1.xlsx]

## Sheet: Figure 2_FS 1-A
	PML foci/nucleus	ctrl 2d	ctrl B02 2d	doxo 375 2d		yH2AX foci nucleus	ctrl 2d	ctrl B02 2d	doxo 375 2d
		11	9	18			1	1	35
		9	6	35			0	0	55
		8	9	31			0	0	61
		10	6	14			0	0	22
		13	7	30			23	0	56
		4	7	17			0	0	37
		11	6	37			8	0	54
		3	4	20			0	0	44
		8	6	4			1	0	8
		3	8	24			0	3	52
		13	18	9			0	1	23
		10	6	44			2	0	88
		12	2	14			0	0	46
		2	12	31			0	0	39
		8	11	13			0	0	46
		5	4	16			0	0	23
		7	3	40			1	0	83
		4	8	33			1	2	61
		5	10	20			0	1	49
		5	6	15			1	0	38
		5	9	17			0	0	37
		7	7	41			0	0	99
		11	3	14			4	0	44
		4	5	24			0	1	76
		5	11	48			0	2	54
		11	6	21			1	1	55
		8	6	36			0	0	105
		7	10	32			0	0	73
		9	8	11			0	0	33
		6	16	11			0	1	48
		9	9	15			0	0	28
		12	10	15			3	0	39
		0	8	19			0	0	25
		10	9	24			9	0	44
		16	7	27			2	1	61
		7	12	32			4	0	47
		1	3	14			2	0	49
		11	6	40			0	1	55
		7	23	34			0	25	96
		5	3	28			0	0	47
		11	6	15			0	0	20
		5	10	33			11	1	53
		10	7	12			1	1	20
		7	8	10			0	0	22
		9	5	33			11	1	71
		6	14	11			0	1	30
		14	10	26			11	1	55
		7	5	38			0	0	80
		12	13	15			1	0	47
		3	7	9			0	0	79
		3	4	31			1	0	18
		8	10	36			1	1	50
		10	6	8			0	0	6
		11	7	15			0	0	34
		4	8	31			0	0	81
		9	7	34			2	0	71
		8	7	21			15	0	23
		6	8	29			1	0	58
		10	16	21			0	0	17
		16	1	17			1	0	31
		7	4	15			0	0	27
		4	10	31			1	1	64
		3	6	74			5	2	24
		14	6	47			0	0	101
		13	4	15			0	0	42
		9	8	26			0	0	79
		6	11	31			0	1	62
		2	8	45			1	0	50
		8	0	19			2	0	15
		6	5	19			1	0	16
		9	3	29			0	0	44
		8	10	43			1	0	70
		1	5	19			0	0	49
		8	8	24			1	0	32
		8	3	19			15	0	34
		8	7	36			0	6	48
		4	7	17			0	0	47
		4	6	27			2	1	26
		4	11	24			0	0	46
		10	18	40			0	0	94
		4	6	9			9	0	17
		6	5	39			0	0	55
		4	16	31			0	0	48
		8	2	41			0	0	123
		12	7	24			2	0	36
		1	10	38			3	5	43
		5	4	18			0	0	61
		4	9	30			0	0	78
		9	7	14			0	0	44
		3	0	38			0	3	19
		8	7	19			0	0	37
		7	8	35			0	0	40
		6	6	20			9	0	10
		7	6	31			0	0	79
		9	8	31			0	1	56
		5	8	32			13	0	52
		3	4	12			2	0	15
		7	4	57			0	0	113
		12	7	50			1	0	112
		12	4	29			1	0	54
		0	8	26			1	2	41
		1	4	13			5	0	37
		3	3	35			1	0	68
		9	11	13			0	1	35
		5	3	48			0	0	95
		16	5	18			0	0	48
		8	6	17			0	0	28
		8	6	20			7	0	49
		7	9	46			0	0	52
		6	15	39			2	2	72
		9	11	17			0	2	48
		5	10	38			1	1	56
		2	16	11			6	2	30
		10	8	35			1	0	48
		10	15	19			1	1	25
		6	11	34			1	0	79
		4	8	36			0	1	53
		10	9	26			20	0	44
		9	7	40			0	0	106
		4	7	36			0	0	61
		3	6	15			0	1	47
		2	7	41			1	1	67
		6	11	45			1	0	31
		10	9	38			0	0	87
		8	6	9			0	0	18
		5	8	43			1	1	70
		4	3	17			14	0	41
		7	7	32			2	0	35
		4	4	43			0	1	74
		4	4	47			0	0	43
		9	6	49			0	0	93
		2	7	16			1	1	37
		24	13	42			1	1	55
		7	9	19			1	0	35
		6	6	48			1	0	96
		1	4	41			0	0	72
		6	7	18			0	1	27
		4	18	15			8	1	35
		4	12	18			0	0	37
		9	11	48			0	0	107
		1	8	16			0	1	11
		15	9	16			0	0	20
		6	7	24			0	0	88
		10	12	33			0	1	63
		6	7	22			0	1	42
		9	12	13			0	4	30
		11	13	25			1	2	67
		4	7	24			0	0	69
		6	7	68			6	0	41
		13	8	38			0	0	35
		1	6	22			1	0	58
		5	7	16			0	0	36
		4	3	42			0	0	21
		8	16	31			0	2	72
		3	3	20			0	12	38
		7	5	37			0	0	15
		3	5	21			9	1	45
		4	3	31			0	0	55
		8	8	15			0	0	32
		0	7	23			0	1	57
		9	6	25			0	1	48
		7	6	15			0	0	22
		8	4	10			0	0	29
		6	3	42			20	0	73
		9	12	26			0	0	69
		7	12	18			3	1	35
		5	7	20			0	25	42
		1	19	41			0	1	83
		6	12	40			0	0	68
		6	10	42			0	1	97
		8	12	37			1	0	98
		8	5	13			1	0	29
		13	6	26			1	0	49
		3	5	32			0	1	30
		3	8	14			0	1	34
		3	5	49			0	1	65
		5	12	49			0	1	89
		2	12	32			0	0	65
		8	9	52			0	0	90
		5	11	36			3	0	73
		5	8	16			0	2	20
		14	5	46			0	0	60
		13	4	18			0	1	33
		2	6	35			0	0	65
		7	10	14			0	0	33
		5	8	19			4	0	36
		11	10	23			6	0	39
		2	14	38			0	2	66
		3	11	20			0	1	24
		4	13	42			1	2	65
		5	5	12			0	0	28
		3	10	18			0	0	30
		15	10	29			0	0	30
		5	8	13			0	0	8
		7	8	57			0	1	87
		6	4	20			0	0	43
		11	5	14			0	0	19
		8	7	25			0	0	39
		5	6	33			1	0	72
		4	12	39			1	0	38
		4	11	20			0	2	59
		6	5	31			0	1	40
		5	7	44			7	0	88
		8	12	34			5	3	55
		4	0	29			0	0	51
		4	14	35			12	0	41
		3	7	31			0	0	53
		4	6	16			0	0	34
		4	9	16			12	0	44
		7	10	33			0	0	84
		4	7	39			0	0	29
		4	12	19			0	0	47
		11	7	45			0	0	97
		9	10	20			10	0	29
		4	6	21			0	1	40
		4	6	24			0	0	39
		6	5	28			0	0	58
		4	4	14			0	0	30
		6	11	20			2	2	32
		5	6	19			0	1	58
		7	13	16			14	1	46
		6	7	25			0	0	37
		6	9	23			4	0	48
		7	4	16			0	0	38
		8	8	18			0	2	28
		1	9	44			0	0	43
		11	10	28			3	0	49
		2	11	9			0	0	30
		7	12	28			1	1	38
		4	4	43			0	0	63
		3	9	43			0	0	100
		12	8	39			0	0	96
		9	11	13			0	1	21
		9	13	14			0	0	48
		7	6	13			0	0	31
		5	10	32			1	0	52
		6	5	20			1	0	29
		4	10	17			0	0	30
		7	6	11			0	0	26
		13	8	19			27	0	24
		6	9	13			0	0	12
		6	4	61			1	0	92
		9	8	16			0	0	42
		5	6	33			0	0	49
		9	4	49			0	0	75
		7	9	46			0	0	99
		3	7	26			1	1	43
		5	4	18			0	0	23
		3	9	43			0	0	74
		8	6	14			0	1	53
		2	4	9			0	0	32
		4	7	17			1	0	44
		4	6	39			0	0	48
		4	6	14			10	1	35
		7	6	36			1	0	61
		8	7	25			5	1	62
		7	8	31			0	0	58
		10	5	27			25	0	28
		6	4	26			0	0	20
		9	7	26			1	1	52
		4	3	25			0	6	33
		4	14	19			0	2	64
		10	7	36			0	0	79
		7	10	37			1	0	64
		8	14	14			0	0	33
		6	6	25			0	0	35
		8	8	28			0	1	69
		6	6	22			5	0	39
		9	8	15			0	0	32
		8	7	12			1	0	41
		2	6	40			0	0	87
		4	7	33			0	0	48
		11	4	34			0	1	47
		6	8	41			0	0	81
		13	2	0			0	1	0
		2	5	34			1	0	88
		6	9	43			0	0	81
		11	8	31			0	0	50
		10	3	0			1	0	0
		9	10	45			0	0	69
		2	3	29			0	1	63
		1	5	0			0	0	0
		5	5	43			6	0	117
		3	6	14			7	0	30
		3	11	36			1	1	37
		8	7	12			0	0	40
		6	7	17			0	0	48
		5	7	16			1	0	25
		6	7	23			0	1	78
		7	6	23			0	0	26
		8	3	32			9	1	73
		4	4	24			0	1	47
		12	7	22			0	1	28
		5	10	14			3	0	35
		13	7	18			0	3	110
		8	7	23			1	0	21
		10	3	16			4	2	26
		6	9	32			0	1	92
		2	6	22			1	0	33
		2	6	16			0	0	33
		4	12	14			0	0	14
		8	8	20			0	0	38
		0	1	41			1	1	59
		11	11	24			0	0	64
		10	4	46			0	1	52
		5	1	24			0	0	58
		3	9	22			22	0	45
		6	4	16			0	0	30
		7	10	46			1	0	81
		7	12	31			0	0	55
		11	9	46			0	1	57
		5	7	45			0	0	99
		5	7	24			0	0	43
		8	6	21			0	0	41
		4	8	14			0	0	32
		10	8	53			0	0	93
		1	4	19			3	0	47
		5	20	13			8	0	55
		17	8	14			0	0	54
		10	5	28			0	0	38
		7	10	25			6	0	47
		3	7	48			0	0	69
		6	6	21			0	0	24
		10	16	33			1	0	33
		9	9	22			0	0	31
		6	5	34			0	0	85
		13	3	31			4	0	72
		10	6	27			0	0	48
		5	8	14			0	0	30
		5	5	17			0	0	17
		10	1	39			0	1	46
		15	7	27			1	0	71
		6	7	23			2	1	29
		7	9	34			0	1	75
		10	7	43			0	0	79
		5	13	10			0	0	33
		2	8	18			1	0	27
		10	5	18			0	0	11
		7	9	36			0	0	49
		8	18	41			5	1	64
		5	14	11			1	2	26
		12	5	13			10	0	23
		10	8	25			0	0	52
		6	5	41			1	0	93
		7	15	12			0	28	35
		5	6	51			17	0	56
		8	5	26			2	0	64
		9	8	14			0	0	40
		6	6	10			0	1	22
		7	9	20			0	0	36
		9	9	12			0	1	28
		5	11	42			0	0	66
		10	11	13			0	0	30
		3	14	37			1	1	72
		3	6	14			1	0	34
		8	7	46			1	0	58
		9	9	21			0	0	77
		12	9	47			0	0	130
		2	10	10			0	0	28
		4	9	35			0	1	86
		2	8	21			0	1	58
		2	6	26			0	0	73
		1	12	9			0	0	26
		5	6	40			0	4	64
		4	13	37			0	1	70
		7	8	35			0	1	44
		15	6	20			1	0	29
		14	8	18			5	1	55
		2	5	24			0	1	30
		9	7	61			0	0	80
		7	10	16			0	0	43
		4	11	15			3	3	29
		5	7	13			0	0	29
		2	6	18			0	0	30
		4	7	15			0	0	21
		6	6	19			0	3	17
		9	6	12			6	0	31
		7	6	24			16	1	31
		5	11	44			0	1	99
		9	4	45			1	0	102
		10	7	19			0	0	36
		12	8	12			1	0	12
		4	21	23			10	1	32
		5	12	19			0	0	62
		6	5	18			0	1	41
		9	10	27			1	0	43
		5	5	37			0	0	36
		7	4	15			3	0	28
		5	5	37			0	0	66
		10	3	22			0	13	49
		6	6	16			11	0	25
		6	8	19			0	0	38
		7	6	39			1	0	76
		4	4	45			0	0	90
		5	6	13			0	0	18
		6	5	36			0	0	60
		7	4	4			0	0	3
		13	7	15			0	2	31
		2	11	35			1	0	76
		1	5	30			1	1	45
		6	6	20			0	2	36
		8	6	31			1	0	87
		3	7	22			1	1	29
		8	9	41			0	2	64
		1	5	40			1	0	84
		3	12	20			1	0	8
		4	6	40			0	0	82
		8	8	36			0	0	62
		11	6	37			1	1	60
		9	10	38			0	0	73
		5	8	25			0	0	71
		8	6	31			0	0	94
		2	7	16			10	0	20
		10	7	46			0	0	78
		2	4	44			1	0	69
		14	8	18			0	0	32
		4	1	16			4	0	39
		3	5	34			0	0	93
		2	5	23			0	0	59
		5	9	18			1	2	37
		5	1	26			0	0	43
		11	5	19			0	0	39
		3	7	26			0	1	64
		6	5	15			0	1	19
		2	6	42			0	0	20
		10	10	28			0	0	67
		2	7	29			0	1	43
		2	5	40			0	0	48
		1	9	38			0	1	63
		7	12	38			15	5	71
		9	8	33			5	0	38
		3	4	27			1	0	42
		2	7	21			1	2	39
		12	6	13			1	1	24
		5	11	37			9	1	120
		7	6	23			0	1	49
		3	10	39			0	46	83
		6	4	37			0	0	76
		8	7	18			10	0	26
		8	8	41			0	0	41
		3	8	21			1	0	43
		7	5	29			0	0	62
		5	4	12			0	0	25
		4	4	20			3	0	60
		3	7	7			3	0	32
		7	5	34			5	0	78
		4	7	27			0	0	53
		6	8	17			3	1	32
		2	3	28			0	0	66
		4	8	10			7	0	32
		10	5	30			2	0	38
		4	7	58			0	0	102
		6	10	12			2	0	35
		9	9	34			0	0	39
		6	10	18			0	10	48
		8	5	16			0	0	26
		3	6	22			0	0	26
		12	3	27			1	0	18
		6	7	13			0	0	48
		0	4	14			0	0	36
		3	9	20			0	2	56
		4	10	15			0	0	30
		3	6	10			0	0	42
		5	5	31			0	0	71
		4	7	36			29	1	87
		0	6	20			9	0	72
		1	4	9			1	0	0
		5	5	39			0	0	44
		4	9	49			0	1	74
		9	4	11			7	0	29
		7	7	31			0	1	87
		6	6	44			0	0	82
		6	2	19			0	0	23
		11	11	37			0	2	84
		11	2	31			2	0	56
		4	5	60			0	0	69
		19	2	78			12	0	169
		9	12	19			2	0	26
		5	4	14			0	0	42
		7	4	16			0	0	26
		9	8	50			9	0	41
		5	13	37			1	0	45
		8	8	39			0	0	89
		4	8	43			0	1	71
		4	8	27			1	1	56
		3	10	16			8	1	17
		8	8	26			0	0	45
		2	10	16			0	0	25
		12	6	55			1	2	97
		5	11	28			0	6	37
		5	2	13			0	1	27
		7	10	16			0	1	37
		12	5	39			8	2	38
		4	5	30			0	0	44
		5	8	26			0	0	42
		8	6	16			0	0	24
		3	4	16			0	0	7
		4	11	21			0	2	32
		9	12	17			0	3	31
		5	17	26			0	1	71
		6	12	9			0	24	15
		5	8	6			1	8	4
		3	6	16			0	0	30
		5	7	18			4	0	22
		8	7	16			0	12	20
		10	9	40			8	0	60
		5	7	42			0	0	50
		8	6	39			1	0	82
		4	6	18			1	0	34
		5	3	8			0	0	29
		4	6	20			0	0	23
		2	2	19			1	0	44
		4	11	31			0	2	75
		5	7	36			4	0	40
		11	9	15			0	0	31
		5	6	30			5	0	83
		7	7	34			0	1	32
		4	5	7			0	0	10
		17	8	21			0	0	19
		7	5	15			1	0	25
		10	8	12			0	1	20
		3	4	36			0	0	80
		9	3	26			2	1	78
		7	7	12			0	0	42
		4	12	15			0	0	39
		6	8	46			2	0	122
		0	4	42			2	1	48
		5	9	3			13	0	6
		5	5	18			0	0	45
		7	10	11			5	0	23
		3	2	21			0	1	22
		10	5	17			0	0	35
		4	14	28			0	2	30
		4	7	22			0	0	45
		23	10	34			17	1	81
		5	7	15			0	0	26
		5	11	41			0	0	58
		10	7	34			0	1	36
		4	9	34			0	0	41
		0	9	9			0	0	23
		5	4	30			0	0	71
		1	9	34			0	2	30
		5	10	31			0	0	39
		8	8	15			4	1	34
		15	7	8			0	0	26
		6	7	17			5	33	29
		9	13	31			0	2	71
		0	9	53			0	2	88
		9	12	29			5	0	52
		9	9	33			0	1	43
		12	7	17			0	0	37
		3	9	16			1	0	36
		1	4	32			1	0	26
		12	6	49			0	0	73
		6	8	23			0	1	40
		4	5	40			0	2	42
		6	15	37			0	0	100
		4	10	28			0	0	49
		1	8	21			1	0	16
		6	8	18			0	0	33
		0	10	18			0	0	39
		8	8	9			0	0	34
		20	5	32			0	0	54
		6	14	18			0	0	41
		8	8	19			0	0	19
		9	7	31			0	0	64
		4	7	46			4	0	82
		3	8	44			8	0	56
		9	5	17			0	1	30
		10	6	32			2	0	64
		11	10	27			0	0	52
		13	9	38			5	0	63
		11	5	22			0	0	27
		9	8	49			0	0	42
		4	9	37			0	1	108
		8	12	8			0	0	16
		4	6	18			3	1	47
		0	8	14			0	0	29
		5	6	11			0	1	36
		7	7	46			0	0	78
		7	10	25			0	1	41
		10	11	14			1	0	33
		4	9	23			0	0	38
		1	11	19			1	21	33
		20	7				16	0
		7	11				2	0
		11	5				3	0
		9	15				0	1
		9	7				0	0
		6	8				0	1
		0	5				0	0
		1	3				1	0
		1	8				0	0
		5	3				0	0
		7	6				0	0
		3	8				0	0
		9	3				0	0
		1	9				0	0
		10	7				0	0
		4	12				0	8
		2	5				0	0
		9	6				1	1
		10	7				0	0
		5	4				0	0
		7	28				0	1
		8	7				0	0
		4	4				0	0
		8	8				4	0
		6	4				0	0
		8	1				9	0
		1	9				5	0
		5	5				0	0
		6	7				0	0
		5	6				0	0
		0	10				2	0
		8	9				0	0
		7	7				0	0
		1	5				0	0
		2	9				0	1
		10	11				1	0
		5	5				6	0
		1	9				1	1
		9	6				1	0
		10	7				1	0
		3	3				0	0
		7	8				4	1
		5	4				0	0
		0	6				0	1
		5	10				0	1
		4	4				2	0
		9	9				0	0
		14	4				2	0
		7	8				0	1
		2	9				0	0
		9	5				0	0
		4	11				0	0
		11	3				1	0
		4	7				1	6
		9	10				0	0
		10	11				0	0
		5	6				9	0
		6	4				0	0
		7	8				0	0
		8	6				12	0
		11	7				0	0
		4	8				5	0
		4	3				2	0
		4	14				0	3
		6	6				0	1
		9	5				0	1
		3	8				0	0
		2	5				0	0
		9	6				1	1
		16	8				1	1
		3	7				0	2
		14	8				1	2
		9	4				11	0
		2	3				13	0
		5	3				0	1
		4	10				3	0
		5	6				0	0
		9	7				0	0
		4	8				0	0
		2	5				0	0
		3	4				0	0
		4	12				14	0
		3	12				4	0
		4	2				2	0
		5	8				0	14
		16	9				14	2
		15	9				0	2
		4	3				6	0
		4	8				0	0
		8	6				12	0
		6	18				0	0
		12	11				2	0
		8	9				0	0
		8	4				0	0
		6	10				0	0
		3	7				1	0
		6	6				2	0
		3	15				0	1
		10	7				4	0
		9	5				2	0
		14	7				0	2
		7	9				0	0
		6	24				0	5
		10	6				1	0
		8	6				5	0
		6	13				0	1
		1	14				0	0
		5	9				1	0
		3	11				0	1
		11	8				0	0
		8	19				0	1
		14	6				2	0
		4	6				14	1
		3	6				3	0
		8	9				2	0
		8	5				0	0
		3	8				4	0
		3	10				1	1
		5	5				1	0
		16	7				0	1
		5	9				0	0
		3	7				0	0
		5	10				15	0
		6	4				0	0
		8	7				8	0
		4	5				0	0
		14	5				0	0
		11	7				3	0
		12	5				12	0
		2	14				0	3
		18	8				3	0
		10	4				0	0
		9	8				4	0
		7	12				1	0
		6	8				0	0
		6	6				3	0
		4	6				0	0
		9	7				0	0
		1	5				1	0
		3	5				0	0
		4	5				3	0
		8	7				2	1
		4	7				0	0
		0	4				3	27
		4	1				0	0
		4	9				1	5
		1	4				0	0
		5	10				0	0
		10	5				0	0
		6	6				7	0
		7	14				12	2
		9	15				0	3
		5	7				0	1
		4	5				0	0
		3	8				0	5
		5	12				0	1
		7	4				1	0
		13	11				0	0
		8	7				2	0
		9	11				3	0
		12	6				3	0
		3	8				0	0
		5	9				0	0
		7	9				1	0
		4	6				0	1
		11	4				0	0
		6	9				0	0
		10	12				17	1
		4	6				10	0
		5	9				2	1
		8	7				2	1
		4	5				0	42
		9	5				3	0
		11	9				0	0
		2	7				0	0
		12	5				0	0
		3	8				0	0
		8	6				2	1
		6	4				8	0
		6	13				0	2
		6	6				10	0
		6	6				2	0
		4	10				0	0
		10	7				0	0
		11	5				9	0
		5	8				0	0
		9	10				5	1
		6	7				2	1
		4	13				20	1
		8	3				0	0
		12	4				0	1
		5	6				0	0
		5	5				1	0
		5	4				0	0
		4	2				8	0
		3	9				4	0
		9	9				0	0
		3	8				1	2
		3	10				0	0
		4	8				0	1
		5	6				3	0
		8	2				0	0
		9	2				7	2
		4	0				0	0
		33	7				0	1
		19	4				0	0
		8	10				0	0
		5	11				0	0
		8	10				0	0
		10	11				0	0
		9	7				2	0
		4	8				0	2
		11	7				1	1
		5	9				0	1
		2	7				0	0
		5	8				0	0
		11	7				1	2
		4	7				0	0
		2	6				0	3
		2	9				0	0
		3	6				6	0
		4	6				0	0
		10	6				0	0
		6	10				0	0
		1	8				1	0
		4	6				0	1
		17	6				1	1
		3	4				0	0
		4	6				16	0
		8	4				0	0
		3	11				2	1
		7	4				10	0
		9	5				4	0
		4	8				0	0
		5	10				0	1
		9	5				0	1
		3	12				0	0
		5	6				15	0
		8	10				1	0
		9	4				0	0
		6	12				1	1
		10	7				1	0
		11	10				1	2
		3	8				0	0
		10	9				15	0
		11	8				0	0
		4	6				0	0
		6	10				0	0
		10	6				3	0
		4	7				0	0
		6	5				2	0
		4	4				6	0
		3	2				11	0
		4	8				4	0
		12	5				4	0
		5	2				0	1
		5	0				11	0
		6	9				2	0
		4	6				0	1
		4	4				0	9
		12	7				0	0
		8	7				0	0
		13	10				1	2
		11	6				0	0
		10	8				0	1
		5	8				0	0
		8	3				0	0
		5	18				0	3
		2	4				3	0
		11	10				0	1
		3	6				0	0
		9	4				0	0
		11	1				0	0
		0	9				0	0
		7	7				0	1
		11	7				0	2
		2	4				0	0
		9	6				0	0
		3	12				0	0
		5	3				0	0
		11	4				0	0
		1	4				4	3
		7	5				0	0
		14	3				1	1
		2	13				0	3
		3	20				0	0
		6	15				1	0
		12	11				3	2
		5	6				0	0
		6	5				0	0
		5	8				0	0
		7	9				0	2
		8	11				5	4
		13	11				3	1
		5	10				6	0
		14	6				0	1
		5	7				0	1
		8	10				0	0
		6	4				3	0
		7	9				0	0
		4	10				0	1
		5	3				10	0
		10	6				1	0
		8	5				8	0
		3	7				8	0
		1	4				6	0
		5	3				0	0
		9	8				3	0
		7	15				0	2
		12	6				2	0
		5	6				0	0
		8	8				0	1
		5	6				16	0
		3	10				1	0
		2	9				0	1
		5	11				3	0
		4	12				2	2
		6	6				0	0
		6	9				9	0
		3	7				0	1
		3	7				2	0
		7	3				1	0
		3	8				0	0
		5	7				0	0
		9	6				0	1
		9	7				0	0
		8	8				0	0
		2	6				0	2
		8	7				10	0
		6	5				0	1
		0	3				0	0
		5	6				1	1
		6	1				0	1
		0	7				1	0
		5	8				0	0
		5	11				0	0
		6	8				3	0
		4	14				16	1
		13	5				4	0
		2	10				3	0
		5	6				0	1
		6	9				5	0
		8	7				0	2
		6	2				0	0
		7	7				0	0
		4	12				0	0
		6	11				7	0
		10	8				0	0
		5	9				3	0
		8	5				0	0
		6	4				4	1
		3	14				0	0
		5	4				0	0
		3	3				0	1
		10	6				0	0
		4	12				8	0
		0	7				1	0
		17	5				14	18
		2	6				0	0
		1	10				0	0
		10	15				0	0
		4	5				0	0
		8	5				0	0
		5	15				0	0
		4	9				0	0
		3	11				0	0
		1	7				3	1
		10	13				0	2
		9	11				0	1
		7	5				0	1
		8	11				0	2
		6	9				0	0
		10	7				1	0
		6	7				1	0
		9	7				3	0
		8	9				1	1
		8	4				0	0
		6	11				0	1
		7	10				0	0
		1	9				0	0
		3	11				0	0
		9	6				0	0
		12	13				0	0
		3	10				0	0
		6	8				1	0
		6	18				0	6
		4	17				0	7
		2	8				0	0
		5	5				6	0
		3	4				0	0
		6	5				0	0
		8	6				14	0
		3	3				0	1
		5	10				3	1
		2	8				0	0
		9	4				13	0
		9	14				1	11
		9	9				8	1
		4	9				0	0
		18	4				5	0
		5	9				0	2
		9	22				0	0
		0	7				1	1
		10	6				0	0
		6	4				20	0
		8	13				0	0
		3	7				0	5
		4	10				6	21
		12	6				18	1
		4	9				2	0
		6	7				0	0
		3	8				2	0
		1	12				0	0
		7	5				0	0
		2	8				0	1
		4	7				0	0
		7	6				0	0
		0	5				6	0
		4	12				0	0
		7	8				4	0
		1	12				1	0
		4	15				0	1
		7	17				0	1
		7	6				0	0
		8	9				4	3
		15	8				0	0
		7	6				0	0
		22	10				1	0
		2	10				0	1
		5	8				0	0
		3	5				0	0
		6	7				0	23
		12	8				1	0
		7	7				0	0
		13	10				1	0
		7	12				0	0
		6	5				0	0
		4	3				0	0
		7	8				0	1
		2	5				0	1
		3	8				0	1
		6	8				0	0
		9	17				0	3
		10	3				0	0
		6	15				0	0
		12	7				1	0
		8	10				0	0
		8	4				12	0
		3	8				1	0
		4	2				0	2
		6	7				0	0
		1	4				0	1
		14	8				4	0
		5	6				0	0
		11	11				15	0
		5	2				0	0
		7	3				1	1
		5	18				0	3
		8	27				0	1
		6	16				0	0
		6	13				0	0
		2	5				0	0
		5	12				0	0
		4	12				0	0
		9	3				0	0
		4	2				0	0
		5	14				0	2
		8	8				0	0
		10	4				0	0
		5	10				1	1
		5	11				0	0
		7	16				1	2
		13	12				2	4
		8	16				0	0
		8	10				3	0
		3	7				0	1
		4	17				0	3
		11	7				14	0
		6	12				1	0
		7	10				1	0
		14	12				13	0
		7	3				0	0
		2	8				0	0
		6	8				1	0
		8	11				16	3
		7	6				3	0
		3	8				1	0
		9	7				0	0
		3	10				0	0
		3	4				0	1
		9	10				9	1
		4	5				0	1
		9	6				0	1
		9	6				0	0
		7	7				4	1
		6	9				5	2
		8	5				0	0
		17	6				1	0
		6	9				0	2
		10	7				0	0
		7	7				0	0
		9	11				0	0
		10	8				8	0
		5	11				12	0
		9	20				1	3
		6	12				0	1
		13	9				0	0
		2	4				2	0
		5	7				0	0
		10	5				0	0
		5	14				0	0
		9	12				12	0
		13	10				0	1
		9	8				0	0
		6	8				0	0
		5	9				2	1
		5	5				3	2
		4	8				1	1
		9	5				2	0
		6	6				2	1
		4	10				0	0
		9	4				0	0
		3	5				0	0
		7	7				3	2
		5	12				0	1
		3	5				0	1
		20	12				2	0
		5	7				0	0
		6	7				0	0
		4	6				1	0
		7	9				0	1
		7	1				0	0
		11	6				5	0
		3	8				0	2
		3	6				0	0
		4	8				1	0
		4	13				0	2
		10	10				7	0
		17	4				2	1
		11	6				0	0
		3	5				0	0
		7	4				14	0
		16	7				1	0
		3	11				0	0
		4	3				0	0
		6	14				1	3
		6	12				2	0
		3	10				0	0
		6	10				0	0
		0	4				0	1
		5	4				0	2
		8	10				13	0
		8	13				2	1
		10	6				1	0
		2	7				1	1
		8	8				4	128
		6	9				17	0
		6	14				0	0
		7	6				0	0
		7	7				0	0
		9	5				0	1
		3	5				0	0
		10					2
		9					0
		4					4
		4					0
		6					0
		8					0
		8					0
		3					0
		7					12
		7					1
		3					0
		4					5
		6					0
		1					1
		15					0
		11					20
		0					0
		5					0
		13					3
		7					19
		2					1
		2					0
		4					0
		8					1
		12					2
		17					0
		4					0
		13					0
		8					0
		3					1
		3					1
		3					0
		4					0
		5					0
		3					0
		7					0
		11					0
		12					0
		5					0
		3					0
		3					3
		20					8
		5					0
		11					0
		12					0
		4					0
		18					0
		5					0
		5					0
		3					3
		3					0
		5					0
		2					1
		14					0
		12					1
		6					0
		8					0
		6					9
		6					1
		0					0
		1					0
		9					11
		7					9
		2					0
		2					6
		9					0
		10					1
		7					2
		3					2
		9					0
		2					1
		5					0
		1					1
		6					11
		9					1
		3					1
		4					0
		4					0
		2					1
		6					8
		4					0
		0					0
		11					0
		3					0
		10					14
		13					2
		11					0
		8					0
		8					0
		3					6
		5					0
		5					0
		10					0
		9					0
		12					3
		4					7
		3					8
		8					0
		8					0
		7					4
		7					3
		4					0
		3					0
		7					6
		2					1
		4					0
		11					0
		5					0
		8					0
		10					0
		14					0
		13					0
		6					0
		9					0
		9					4
		7					0
		12					3
		1					0
		4					1
		5					0
		6					0
		2					0
		13					1
		8					0
		9					0
		7					0
		9					0
		7					0
		9					0
		12					0
		4					0
		3					0
		23					5
		5					0
		8					1
		5					6
		1					0
		5					0
		4					2
		2					0
		2					1
		10					0
		3					0
		2					2
		3					1
		4					0
		10					0
		3					6
		10					4
		2					6
		9					7
		10					0
		14					0
		6					8
		4					0
		7					0
		4					0
		9					0
		8					0
		4					0
		4					0
		4					0
		2					0
		11					0
		4					0
		11					0
		10					0
		11					0
		6					1
		11					5
		9					2
		7					0
		4					0
		14					1
		7					0
		8					1
		12					0
		8					0
		2					0
		12					0
		5					0
		4					4
		6					2
		13					0
		9					0
		10					0
		3					4
		7					0
		17					0
		10					0
		2					1
		6					0
		12					1
		9					0
		3					0
		8					12
		3					0
		11					0
		10					0
		11					19
		5					1
		11					5
		12					32
		6					0
		5					0
		7					8
		4					0
		6					3
		6					13
		3					0
		6					0
		4					0
		5					0
		5					0
		4					0
		6					1
		5					16
		8					0
		12					0
		4					0
		27					3
		8					0
		6					0
		6					0
		10					1
		4					0
		3					0
		7					1
		7					14
		4					0
		3					0
		4					0
		2					0
		8					1
		6					2
		9					1
		6					6
		4					0
		10					0
		5					1
		2					0
		13					0
		5					0
		11					0
		4					0
		5					0
		6					0
		7					0
		5					1
		7					2
		13					0
		7					0
		10					11
		8					0
		7					0
		20					27
		7					0
		3					0
		7					0
		7					0
		3					13
		2					0
		6					5
		8					0
		9					1
		3					0
		4					1
		5					0
		9					0
		12					0
		11					12
		10					0
		7					5
		3					0
		10					1
		6					0
		4					0
		9					0
		8					8
		11					0
		5					0
		2					1
		7					0
		5					0
		4					8
		3					0
		6					5
		5					0
		5					0
		5					0
		4					0
		2					1
		8					0
		3					0
		7					0
		11					17
		17					0
		0					0
		4					0
		6					2
		5					0
		13					11
		7					1
		3					0
		6					0
		3					0
		2					14
		8					6
		3					0
		3					0
		7					7
		7					0
		4					1
		3					3
		1					4
		3					1
		4					0
		1					1
		7					0
		11					8
		4					0
		1					11
		3					0
		3					2
		13					2
		5					1
		1					0
		13					1
		9					0
		5					11
		8					0
		2					0
		5					0
		3					0
		5					0
		6					0
		7					0
		2					1
		3					0
		7					0
		3					0
		6					13
		4					0
		10					0
		3					0
		1					3
		4					4
		4					0
		2					2
		5					0
		3					0
		8					0
		3					1
		1					0
		5					2
		13					0
		5					0
		2					0
		7					0
		6					0
		4					0
		5					0
		13					0
		9					0
		7					0
		7					0
		10					0
		9					0
		6					0
		4					0
		5					0
		9					3
		8					17
		7					0
		6					2
		10					0
		5					0
		2					0
		1					1
		6					0
		5					0
		11					0
		3					19
		5					4
		4					0
		7					3
		5					0
		5					5
		5					0
		15					1
		7					0
		5					0
		6					0
		6					0
		9					1
		8					10
		1					0
		5					0
		5					0
		10					1
		6					0
		7					0
		5					0
		2					0
		12					11
		12					1
		2					9
		7					5
		4					6
		4					0
		5					0
		11					0
		5					0
		3					0
		6					0
		9					10
		13					10
		4					0
		5					0
		3					7
		7					0
		5					2
		3					0
		4					1
		4					0
		6					3
		3					1
		6					0
		5					0
		7					12
		11					0
		11					3
		7					1
		7					0
		6					1
		9					2
		4					0
		13					0
		7					0
		10					0
		7					0
		10					0
		10					0
		6					0
		3					0
		5					0
		2					3
		7					0
		1					8
		12					11
		13					0
		5					0
		6					0
		9					7
		10					1
		6					0
		11					3
		3					0
		10					0
		4					1
		6					2
		1					0
		7					1
		1					1
		4					8
		5					0
		8					3
		3					0
		1					0
		3					0
		4					1
		7					0
		7					3
		6					3
		9					0
		8					6
		4					0
		8					0
		14					2
		7					1
		3					0
		8					4
		3					2
		2					0
		7					0
		8					0
		6					0
		2					10
		3					0
		7					5
		4					4
		6					12
		7					4
		6					0
		5					6
		16					15
		10					1
		4					11
		6					1
		7					8
		6					0
		10					15
		3					1
		13					1
		3					1
		4					8
		4					1
		11					0
		2					0
		3					0
		9					6
		7					5
		4					2
		9					0
		6					0
		4					0
		4					0
		7					2
		5					0
		7					0
		2					0
		10					23
		2					8
		5					0
		3					0
		5					0
		4					0
		2					7
		3					0
		5					1
		16					17
		14					0
		4					0
		2					0
		9					13
		11					0
		6					0
		9					0
		6					1
		11					0
		9					0
		3					0
		6					11
		10					0
		4					10
		3					1
		11					0
		4					10
		5					1
		8					1
		6					0
		5					0
		5					0
		9					0
		3					0
		10					0
		15					0
		5					2
		14					0
		7					1
		5					0
		13					0
		9					1
		7					24
		4					2
		9					0
		9					0
		3					13
		2					0
		2					0
		8					1
		6					0
		5					8
		5					0
		4					0
		7					0
		16					1
		5					0
		2					0
		2					0
		8					1
		4					0
		5					2
		16					0
		14					1
		6					0
		7					7
		7					0
		4					0
		9					0
		7					0
		13					6
		7					0
		16					1
		7					5
		10					15
		14					1
		13					1
		7					0
		5					0
		5					0
		13					0
		3					0
		14					0
		20					0
		6					1
		7					0
		6					0
		8					2
		11					0
		7					7
		8					0
		12					0
		4					0
		14					1
		4					0
		11					0
		4					0
		3					0
		14					0
		4					0
		8					1
		4					14
		9					0
		5					0
		8					0
		5					0
		2					2
		3					0
		2					0
		4					0
		7					0
		9					0
		4					0
		6					0
		3					0
		6					0
		5					13
		5					1
		12					1
		4					0
		6					0
		4					0
		9					0
		11					9
		6					0
		11					1
		6					0
		18					3
		4					1
		6					1
		8					3
		7					0
		7					0
		8					6
		5					0
		7					0
		2					0
		4					3
		8					0
		5					2
		6					0
		8					0
		6					0
		17					0
		7					0
		7					0
		11					0
		8					0
		9					0
		13					0
		12					1
		8					0
		6					0
		11					1
		7					0
		17					1
		8					0
		12					0
		10					0
		10					0
		5					0
		9					0
		6					0
		5					0
		13					16
		8					0
		4					1
		7					0
		11					2
		13					0
		12					0
		10					0
		14					1
		6					0
		10					0
		5					0
		12					0
		8					0
		12					0
		10					2
		9					1
		5					2
		4					0
		8					0
		7					0
		9					0
		12					0
		4					27
		7					0
		6					0
		5					0
		11					7

## Sheet: Figure 2_FS 1-C
RAD51 foci/nucleus
	0.56 uM DOXO 10 mM BO2 10h	0.56 uM DOXO 20 mM BO2 10h	0.56 uM DOXO DMSO 10h
	113	61	34
	146	63	85
	21	1	60
	67	17	56
	65	41	2
	0	87	144
	60	43	107
	23	83	70
	1	56	83
	127	24	61
	98	22	85
	30	38	77
	44	13	75
	114	10	64
	70	13	38
	65	19	108
	79	20	120
	72	26	125
	128	104	121
	32	3	101
	54	4	132
	26	79	64
	71	9	80
	17	29	85
	45	6	88
	28	66	92
	67	98	114
	53	13	126
	56	69	84
	124	94	110
	54	77	66
	75	86	123
	93	1	175
	9	34	158
	34	28	81
	3	24	78
	74	18	51
	26	20	149
	101	7	103
	53	74	3
	39	91	53
	8	68	10
	82	35	0
	138	29	74
	91	16	1
	32	102	57
	4	3	72
	4	12	19
	70	19	166
	48	58	104
	33	70	57
	115	165	4
	0	80	130
	45	47	88
		22	98
		13	119
		46	179
		2	91
		11	30
		13	99
		8	85
		22	117
		52	122
		28	33
		9	163
		10	101
		27	143
		18	118
		16	149
		32	120
		60	59
		39	102
		47	45
		54	42
		36	165
		28	107
		117	87
		52	92
		4	79
		33	58
		65	146
		36	90
		47	83
		107	103
		69	70
		48	119
		17	68
		16	107
		13	102
		35	148
		47	126
		69	13
		116	21
		28	92
		14	113
		35	135
		49	102
		69	87
		42	62
		105	146
		56	87
		9	160
		49	117
		40	60
		46	82
		33	50
		30	111
		69	130
		61	102
		19	88
		5	76
		108	135
		5	165
		81	119
		53	5
		73	6
		39	88
		90	84
		15	64
		40	94
		68	74
		27	154
		12	63
		9	2
		26	60
		114	109
		42	150
		76	87
		3	137
		45
		7

## Sheet: Figure 2_FS 1-E
% nuclei with PNAs
doxorubicin 0.75 uM	biological replicate:	DMSO 0.025	BO2 5	DMSO 0.05	BO2 10	DMSO 0.1	BO2 20
	128-II	14.0063	22.1	8.8	24.2166	16.6535	19.1623
	21-18-I	30.8943	37.4468	30.9	32	30.8943	30.9702
	19-44-I	32.4201	25.3623	32.4201	23.9496
	19-44-III	33.7662	27.551	33.7662	30

## Sheet: Figure 2_FS 1-F
doxorubicin 0.75 uM_2 d
	bowls					funnells					baloons					PML NDS
biological replicate:	I	II				I	II				I	II				I	II
DMSO 0.025	5.6612	11.7886				5.12386	14.6341				2.0989	1.62602				1.12233	2.84553
BO2 5	8.13596	8.93617				7.56219	20.4255				6.39778	7.65957				0	0.425532
DMSO 0.05	1.9536	11.7886				4.07509	14.6341				2.56029	1.62602				0.198413	2.84553
BO2 10	4.91296	5.2				3.73307	11.6				15.5706	15.2				0	0
DMSO 0.1	3.35968	11.7886				8.95916	14.6341				2.97101	1.62602				1.36364	2.84553
BO2 20	5.61705	3.73134				3.54712	7.46269				9.99813	19.7761				0	0

## Sheet: Figure 2_FS 1-H
% nuclei with PNAs
2 d treatment		doxo 0.375		doxo 0.56		doxo 0.75
	biological replicate:	mock	DNA PKi	mock	DNA PKi	mock	DNA PKi
	Exp 128 IV	4.59664	5.55163	9.46735	14.815	17.1093	21.535
	Exp 128 V	7.51445	15.2047	17.3653	16.9154	22.4242	28.5714
	Exp 128 VII	27.716	22.9805	44.2663	47.3621	59.2772	39.2624

## Sheet: Figure 2_FS 1-I
% nuclei with PNAs
4 d recovery		doxo 0.375		doxo 0.56		doxo 0.75
	biological replicate:	mock	DNA PKi	mock	DNA PKi	mock	DNA PKi
	Exp 128 IV	8.63631	8.34498	11.2392	19.3648	18.4394	20.1187
	Exp 128 V	6.49056	11.1346	7.79095	15.9879	21.7778	19.0359
	Exp 128 VII			37.3272	30.4192	42.671	26.0268
