# Supplementary material for: Topological stress triggers persistent DNA lesions in ribosomal DNA with ensuing formation of PML-nucleolar compartment
Source: eLife. 2024 Oct 10;12:RP91304. doi: 10.7554/eLife.91304 (PMC11466457; doi:10.7554/eLife.91304)
Supplement: Figure 2—figure supplement 2—source data 3. [file elife-91304-fig2-figsupp2-data3.xlsx]

## Sheet: Figure 2_FS 2-A
yH2AX foci/nucleus	NT DNAPKi 0,5h	NT NT 0,5h	2Gy NT 0,5h	2Gy NT 3h	2Gy NT 6h	2Gy DNAPKi 0.5h	2Gy DNAPKi 3h	2Gy DNAPKi 6h
	0	2	34	27	23	26	39	20
	6	2	38	15	2	28	53	23
	1	4	39	16	8	27	43	25
	0	1	37	11	7	31	33	27
	6	1	42	23	6	30	36	36
	6	0	37	23	3	29	44	24
	0	1	34	31	9	11	30	35
	0	3	27	15	9	25	33	27
	0	14	32	15	10	3	45	20
	5	12	42	27	3	6	43	31
	0	4	40	5	30	2	44	24
	6	4	53	25	19	22	38	24
	5	10	32	26	8	24	29	24
	0	1	42	20	15	35	26	0
	0	0	2	14	3	32	48	27
	0	20	44	0	15	33	30	26
	1	5	35	21	4	36	47	35
	6	5	47	17	24	50	28	16
	0	4	40	13	30	42	49	13
	0	0	41	18	6	18	44	27
	1	0	50	27	26	32	24	27
	2	0	38	15	16	0	38	26
	0	0	52	28	14	30	48	19
	0	8	39	31	4	26	48	20
	12	5	22	21	15	38	54	1
	7	3	23	27	2	23	43	21
	0	1	38	15	7	42	51	22
	0	7	29	17	8	36	53	32
	0	0	32	26	22	40	52	24
	0	4	52	13	5	40	25	23
	0	5	45	19	7	35	41	21
	0	1	53	20	8	40	46	14
	1	0	56	27	27	36	46	30
	5	3	40	33	21	34	48	19
	2	8	59	18	9	42	48	19
	0	3	36	13	27	39	41	26
	3	1	39	17	19	26	51	32
	1	0	24	10	3	22	32	19
	0	1	34	22	2	35	34	46
	0	9	31	0	8	40	54	26
	12	0	38	13	27	40	45	38
	0	1	33	21	26	36	39	23
	2	6	62	39	7	41	26	22
	1	1	57	14	11	55	40	51
	4	2	31	5	6	35	35	31
	1	0	33	13	14	24	49	20
	3	9	30	10	7	20	34	30
	2	1	42	17	5	27	44	18
	0	0	38	21	16	48	30	19
	4	0	39	15	26	36	52	28
	0	0	37	31	7	37	30	36
	1	6	40	23	17	17	28	27
	1	4	40	36	9	45	54	21
	0	1	36	11	13	36	53	32
	10	0	45	20	19	25	38	29
	15	0	35	23	23	36	47	25
	1	0	44	12	2	0	43	24
	1	0	35	15	8	36	67	38
	0	1	33	28	7	26	41	29
	0	16	39	13	6	24	47	28
	0	0	34	23	3	22	59	19
	3	3	48	23	9	19	46	19
	5	0	38	20	9	24	45	24
	0	1	48	20	10	19	22	28
	0	6	32	22	3	17	59	20
	0	7	40	23	30	26	33	24
	5	9	29	21	19	18	47	22
	6	5	36	21	8	38	45	26
	0	7	31	17	15	28	36	22
	0	8	40	19	3	41	49	32
	13	0	40	20	15	43	27	26
	4	10	33	14	4	47	44	35
	0	8	28	27	24	38	50	33
	2	12	48	34	30	13	44	25
	3	1	41	16	6	25	54	24
	10	7	22	18	26	15	33	21
	3	1	21	22	16	16	42	22
	4	0	50	19	14	12	35	45
	10	8	40	6	4	25	46	28
	8	6	32	35	15	20	59	34
	0	6	28	15	2	25	45	31
	2	0	42	29	7	32	27	32
	0	1	55	11	8	36	34	26
	0	0	29	16	22	23	27	31
	5	0	38	11	5	42	40	20
	2	9	36	12	7	24	47	23
	0	11	46	27	8	25	35	25
	0	0	14	15	27	22	23	27
	6	1	40	16	21	21	49	36
	0	19	35	11	9	34	38	24
	0	9	39	23	27	31	60	35
	0	0	37	23	19	25	53	27
	0	5	63	31	3	22	30	20
	0	0	40	15	2	24	27	31
	2	1	34	15	8	27	29	24
	0	8	45	27	27	26	23	24
	0	9	44	5	26	8	34	24
	0	16	34	25	7	20	46	0
	0	12	26	26	11	34	47	27
	1	0	59	20	6	39	48	26
	1	5	34	14	14	41	30	35
	1	4	36	0	7	27	31	16
	0	12	52	21	5	32	39	13
	0	0	29	17	16	62	47	27
	4	0	27	13	26	32	33	27
	9	0	32	18	7	33	31	26
	6	1	38	27	17	59	57	19
	6	0	53	15	9	55	37	20
	0	0	27	28	13	44	42	1
	1	2	50	31	19	34	51	21
	0	3	32	21		45	39	22
	0	0	43	27		46	35	32
	1	0	37	15		35	40	24
	2	0	39	17		33	46	23
	2	0	36	26		36	45	21
	0	2	37	13		28	37	14
	0	0	29	19		39	57	30
	0	0	41	20		26	43	19
	0	1	51	27		39	46	19
	0	1	33	33		29	38	26
	1	0	34	18		44	35	32
	0	0	38	13		7	41	19
	0	0	39	17		65	36	46
	0	0	37	10		30	45	26
	2	0	42	22		20	29	38
	2	0	37	0		47	58	23
	0	6	34	13		21	28	22
	2	0	27	21		33	52	51
	0	0	32	39		31	41	31
	0	0	42	14		37	38	20
	3	1	40	5		49	40	30
	2	0	53	13		29	33	18
	1	0	32	10		31	63	19
	0	0	42	17		26	25	28
	0	2	2	21		28	33	36
	0	0	44	15		27	52	27
	4	0	35	31		31	51	21
	4	0	47	23		30	32	32
	0	5	40	36		29	20	29
	1	2	41	11		11	51	25
	3	0	50	20		25	39	24
	5	0	38	23		3	37	38
	7	0	52	12		6	22	29
	0	1	39	15		2	23	28
	0	9	22	28		22	41	19
	0	1	23	13		24	40	19
	1	7	38	23		35	43	24
	2	2	29	23		32	39	28
	2	4	32	20		33	53	20
	1	6	52	20		36	43	24
	6	9	45	22		50	33	22
	1	1	53	23		42	36	26
	0	3	56	21		18	44	22
	9	12	40	21		32	30	32
	3	14	59	17		0	33	26
	6	16	36	19		30	45	35
	1	0	39	20		26	43	33
	1	1	24	14		38	44	25
	0	0	34	27		23	38	24
	6	3	31	34		42	29	21
	1	0	38	16		36	26	22
	0	15	33	18		40	48	45
	6	0	62	22		40	30	28
	6	0	57	19		35	47	34
	0	8	31	6		40	28	31
	0	14	33	35		36	49	32
	0	9	30	15		34	44	26
	5	1	42	29		42	24	31
	0	1	38	11		39	38
	6	0	39	16		26	48
	5	8	37	11		22	48
	0	2	40	12		35	54
	0	2	40			40	43
	0	4	36			40	51
	1	1	45			36	53
	6	1	35			41	52
	0	0	44			55	25
	0	1	35			35	41
	1	3	33			24	46
	2	14	39			20	46
	0	12	34			27	48
	0	4	48			48	48
	12	4	38			36	41
	7	10	48			37	51
	0	1	32			17	32
	0	0	40			45	34
	0	20	29			36	54
	0	5	36			25	45
	0	5	31			36	39
	0	4	40			0	26
	1	0	40			36	40
	5	0	33			26	35
	2	0	28			24	49
	0	0	48			22	34
	3	8	41			19	44
	1	5	22			24	30
	0	3	21			19	52
	0	1	50			17	30
	12	7	40			26	28
	0	0	32			18	54
	2	4	28			38	53
	1	5	42			28	38
	4	1	55			41	47
	1	0	29			43	43
	3	3	38			47	67
	2	8	36			38	41
	0	3	46			13	47
	4	1	14			25	59
	0	0	40			15	46
	1	1	35			16	45
	1	9	39			12	22
	0	0	37			25	59
	10	1	63			20	33
	15	6	40			25	47
	1	1	34			32	45
	1	2	45			36	36
	0	0	44			23	49
	0	9	34			42	27
	0	1	26			24	44
	3	0	59			25	50
	5	0	34			22	44
	0	0	36			21	54
	0	6	52			34	33
	0	4	29			31	42
	5	1	27			25	35
	6	0	32			22	46
	0	0	38			24	59
	0	0	53			27	45
	13	0	27			26	27
	4	1	50			8	34
	0	16	32			20	27
	2	0	43			34	40
	3	3	37			39	47
	10	0	39			41	35
	3	1	36			27	23
	4	6	37			32	49
	10	7	29			62	38
	8	9	41			32	60
	0	5	51			33	53
	2	7	33			59	30
	0	8				55	27
	0	0				44	29
	5	10				34	23
	2	8				45	34
	0	12				46	46
	0	1				35	47
	6	7				33	48
	0	1				36	30
	0	0				28	31
	0	8				39	39
	0	6				26	47
	0	6				39	33
	2	0				29	31
	0	1				44	57
	0	0				7	37
	0	0				65	42
	0	9				30	51
	1	11				20	39
	1	0				47	35
	1	1				21	40
	0	19				33	46
	0	9				31	45
	4	0				37	37
	9	5				49	57
	6	0				29	43
	6	1				31	46
	0	8					38
	1	9					35
	0	16					41
	0	12					36
	1	0					45
	2	5					29
	2	4					58
	0	12					28
	0	0					52
	0	0					41
	0	0					38
	0	1					40
	1	0					33
	0	0					63
	0	2					25
	0	3					33
	2	0					52
	2	0					51
	0	0					32
	2	0					20
	0	2					51
	0	0					39
	3	0					37
	2	1					22
	1	1					23
	0	0					41
	0	0					40
	0	0					43
	4	0
	4	0
	0	0
	1	6
	3	0
	5	0
	7	0
	0	1
	0	0
	0	0
	1	0
	2	2
	2	0
	1	0
	6	0
	1	5
	0	2
	9	0
	3	0
	6	0
	1	1
	1	9
		1
		7
		2
		4
		6
		9
		1
		3
		12
		14
		16
		0
		1
		0
		3
		0
		15
		0
		0
		8
		14
		9
		1
		1
		0
		8
