# Supplementary material for: Topological stress triggers persistent DNA lesions in ribosomal DNA with ensuing formation of PML-nucleolar compartment
Source: eLife. 2024 Oct 10;12:RP91304. doi: 10.7554/eLife.91304 (PMC11466457; doi:10.7554/eLife.91304)
Supplement: Figure 2—source data 1. [file elife-91304-fig2-data1.xlsx]

## Sheet: Figure 2A
% of nuclei with PNAs
2 days
	doxorubicin 0.375 uM						doxorubicin 0.56 uM
biological replicate	DMSO 0.025	BO2 5	DMSO 0.05	BO2 10	DMSO 0.1	BO2 20	DMSO 0.025	BO2 5	DMSO 0.05	BO2 10	DMSO 0.1	BO2 20
I	5.9362	6.83428	4.09453	18.0124	4.30773	26.5837	5.39652	8.99771	3.27176	21.9174	7.50288	29.0025
II	7.6402	2.99135	5.55556	4.57383	3.52662	14.6577	7.64521	7.8201	7	10.4845	5.67481	32.5883
III	4.27453	5.79873	5.89568	8.63013	4.93672	19.6588	15.9252	15.6374	11.4788	23.399	12.0527	23.4109
IV	4.96033	2.09064	6.39597	6.94478	4.44444	35.6223	8.28273	23.1145	16.4244	28.7905	17.4377	21.1641

## Sheet: Figure 2B
proportion of PNAs subtypes
02:00:00
doxorubicin 0.375	bowls					funnells					baloons					PML NDS
biological replicate:	I	II	III	IV	V	I	II	III	IV	V	I	II	III	IV	V	I	II	III	IV	V
DMSO 0.025	0.447713	0.691244	0.455386	1.81955	1.72696	0.211864	0	0.352113	0	1.15697	0	0	0	0	0	5.27662	6.94896	3.46703	3.14078	4.81085
BO2 5	1.3026	0	1.49532	0	1.89817	2.73391	0	2.38034	0	3.46379	0.669686	0	0.549451	0	0.322567	2.12809	2.99135	1.37363	2.09064	2.50414
DMSO 0.05	1.57806	0	1.16151	2.03416	2.32461	0	0	0.167224	0	0.398742	0	0	0.167224	0	0.033445	2.51647	5.55556	4.39972	4.36181	4.55393
BO2 10	8.32628	2.08283	1.36378	1.60864	4.58502	6.13171	0.245098	4.42692	1.27551	7.47809	1.03093	0	1.96424	0.196078	1.30215	2.52346	2.2459	0.875183	3.86455	2.23377
DMSO 0.1	0.449138	0.233645	3.26201	1.88889	2.33265	0	0	0	0.277778	0.593672	0	0	0	0	0	3.85859	3.29297	1.67471	2.27778	3.29704
BO2 20	6.38512	3.7272	2.60184	2.18341	4.3529	10.5455	8.02053	10.5672	27.2271	16.8515	9.65309	1.06838	6.05114	6.21179	9.0604	0	1.84157	0.438596	0	0.541871
doxorubicin 0.56	bowls					funnells					baloons					PML NDS
biological replicate:	I	II	III	IV	V	I	II	III	IV	V	I	II	III	IV	V	I	II	III	IV	V
DMSO 0.025	1.40923	2.42805	3.33132	2.52024	7.62712	0.950512	0.408163	8.94734	4.09709	24.5763	0	0.18315	2.91725	1.6654	3.81356	3.03679	4.62585	0.729312	0	1.69491
BO2 5	2.94989	2.81005	3.28631	8.02277	10.4	3.01956	0.251256	6.44723	10.877	36.8	1.26904	0	5.90387	4.21473	16	1.75923	4.75879	0	0	0
DMSO 0.05	1.67479	2	2.36345	4.69474	8.10811	0.465116	0	5.75397	9.02166	31.5315	0.201613	0	3.36135	2.40674	4.95495	0.930233	5	0	0.301205	0
BO2 10	5.21771	4.82677	5.23399	4.48868	6.00858	12.7099	4.58405	6.39368	13.9551	21.8884	3.80926	0.196078	11.5558	10.133	22.7468	0.180505	0.877594	0.215517	0.213675	0
DMSO 0.1	2.33406	0.696716	3.13524	6.7632	9.70464	2.12358	0.398406	6.68201	8.32845	32.9114	0	0	2.02971	2.11877	3.79747	3.04524	4.57969	0.205761	0.227273	0
BO2 20	2.18922	6.57509	2.47136	7.09584	15.261	3.65981	13.8816	7.70972	4.68943	7.22892	23.1534	12.1317	13.2299	9.37886	18.8755	0	0	0	0	0

## Sheet: Figure 2E
% of nuclei with PNAs
4 d recovery
	0.375 uM doxo						0.56 uM doxo
biological replicate:	DMSO 0.025	BO2 5	DMSO 0.05	BO2 10	DMSO 0.1	BO2 20	DMSO 0.025	BO2 5	DMSO 0.05	BO2 10	DMSO 0.1	BO2 20
I	4.22535	7	8.62944	12.7451	6.37255	24.2574	11.2245	14.7368	12.2449	18.8571	9.04762	41.2698
II	8.38323	6.47059	9.1954	6.48649	5.59006	12.5	15	10.8434	14.7727	11.9171	12.9412	21.3115
III	8.35914	6.88889	6.89979	12.5676	8.97059	23.871	8.43049	17.7749	13.0475	24.6847	13.7285	33.2082
IV	5.02621	1.22265	5.678	8.05532	6.43438	29.7125	12.0891	25.4476	12.8164	22.8916	11.6667	34.8837

## Sheet: Figure 2H
% of nuclei with PNAs
	biological replicate:	etop	etop + siNT	etop + siTDP2
	19-40 I	1	1	4
	19-40 III	1	0	4
	19-IV	0	1	4
