# Supplementary material for: Topological stress triggers persistent DNA lesions in ribosomal DNA with ensuing formation of PML-nucleolar compartment
Source: eLife. 2024 Oct 10;12:RP91304. doi: 10.7554/eLife.91304 (PMC11466457; doi:10.7554/eLife.91304)
Supplement: Figure 3—figure supplement 2—source data 1. [file elife-91304-fig3-figsupp2-data1.xlsx]

## Sheet: Figure 3_FS 2-B
rDNA x PML_colocalization							DJ x PML_colocalization
ctrl	2 d doxo PNAS	2 d doxo	1d WO PML NDS	1 d WO			ctrl	2 d doxo PNAS	2 d doxo	1d WO PML NDS	1 d WO
0	0.2586	0	0	0			0	0.1093	0	0.0166	0
0	0.0144	0.02	0.1264	0.0369			0	0.0036	0	0.0652	0.0032
0.0054	0.1367	0	0.0314	0.001			0	0.1164	0	0.0098	0
0	0.0076	0.0642	0.0986	0.0034			0	0.0863	0	0.0328	0
0.0005	0.0257	0.0065	0.0098	0.0069			0	0.1959	0.021	0	0.01
0	0.0816	0	0.0196	0.0062			0	0.2458	0	0.049	0.0027
0	0.0243	0.0066	0.1117	0.0114			0	0.127	0.0137	0.0902	0.0059
0	0.0612	0.0184	0.0374	0.0117			0	0.05	0.0155	0.029	0.0106
0	0.0027	0.019	0.1528	0.0567			0	0.0191	0	0.0567	0
0	0.0672	0.007	0.0678	0.0161			0	0.0301	0	0.0022	0.0106
0	0.0012	0	0.0369	0.0665			0	0.0019	0	0.0231	0
0	0.0961	0.0058	0.0352	0.0353			0	0.1957	0.0066	0	0
0	0.1895	0	0.0337	0.0406			0	0.1127	0	0.1323	0.0127
0	0.0955	0.0107	0.0259	0.003			0	0.0348	0	0.0073	0.0012
0	0.0089	0.0168	0.0262	0.0016			0	0.0949	0.0353	0.0517	0
0	0.0686	0	0.0255	0.003			0	0.1838	0	0.069	0
0	0.1685	0.0111	0.0204	0.0103			0.0002	0.2004	0	0.0594	0.0084
0		0.0314	0.0308				0		0	0.0026
0			0.0591				0			0.0713
			0.033							0.1256
			0.1127							0.0751
			0.0621							0.02
			0.0346							0.0422
			0.0297							0.0003
			0.0469							0.0167
			0.0282							0.0388
			0.1392							0.0356
