# Supplementary material for: Topological stress triggers persistent DNA lesions in ribosomal DNA with ensuing formation of PML-nucleolar compartment
Source: eLife. 2024 Oct 10;12:RP91304. doi: 10.7554/eLife.91304 (PMC11466457; doi:10.7554/eLife.91304)
Supplement: Figure 3—figure supplement 3—source data 1. [file elife-91304-fig3-figsupp3-data1.xlsx]

## Sheet: Fig.3_FS3-B_4dR_DJx53BP1xPML
			SIZE coloc	SIZE coloc		Final_colocalization of individual DJ object with (x-53BP1_y-PML)
analyzed nucleoli_original name	ID of individual nucleoli	DJ object ID	DJ/53BP1	DJ/PML
001_5fc7327e5a64f_hrm-1-C14.tif	1	1	0	86
001_5fc7327e5a64f_hrm-1-C14.tif	1	2	0	0
001_5fc7327e5a64f_hrm-1-C14.tif	1	3	0	0
001_5fc7327e5a64f_hrm-1-C14.tif	1	4	0	0
001_5fc7327e5a64f_hrm-1-C14.tif	1	5	0	0
001_5fc7327e5a64f_hrm-1-C14.tif	1	6	0	0
001_5fc7327e5a64f_hrm-1-C14.tif	1	7	0	0
001_5fc7327e5a64f_hrm-1-C14.tif	1	8	0	0
001_5fc7327e5a64f_hrm-1-C14.tif	1	9	0	0
001_5fc7327e5a64f_hrm-1-C14.tif	1	10	0	35
002_5fc7327e5ad1a_hrm-1-C14.tif	2	1	0	0
002_5fc7327e5ad1a_hrm-1-C14.tif	2	2	0	0
002_5fc7327e5ad1a_hrm-1-C14.tif	2	3	0	1116
002_5fc7327e5ad1a_hrm-1-C14.tif	2	4	0	0
002_5fc7327e5ad1a_hrm-1-C14.tif	2	5	0	0
002_5fc7327e5ad1a_hrm-1-C14.tif	2	6	0	0
002_5fc7327e5ad1a_hrm-1-C14.tif	2	7	0	52
002_5fc7327e5ad1a_hrm-1-C14.tif	2	8	0	0
002_5fc7327e5ad1a_hrm-1-C14.tif	2	9	0	0
002_5fc7327e5ad1a_hrm-1-C14.tif	2	10	0	0
002_5fc7327e5ad1a_hrm-1-C14.tif	2	11	0	0
002_5fc7327e5ad1a_hrm-1-C14.tif	2	12	0	0
002_5fc7327e5ad1a_hrm-1-C14.tif	2	13	0	0
002_5fc7327e5ad1a_hrm-1-C14.tif	2	14	0	0
002_5fc7327e5ad1a_hrm-1-C14.tif	2	15	0	0
002_5fc7327e5ad1a_hrm-1-C14.tif	2	16	0	0
003_5fc7327e5b3a0_hrm-1-C14.tif	3	1	0	0
003_5fc7327e5b3a0_hrm-1-C14.tif	3	2	0	0
003_5fc7327e5b3a0_hrm-1-C14.tif	3	3	326	42
003_5fc7327e5b3a0_hrm-1-C14.tif	3	4	0	0
003_5fc7327e5b3a0_hrm-1-C14.tif	3	5	0	0
004_5fc7327e5ba37_hrm-1-C14.tif	4	1	0	0
004_5fc7327e5ba37_hrm-1-C14.tif	4	2	0	0
004_5fc7327e5ba37_hrm-1-C14.tif	4	3	0	0
005_5fc7327e5c0bc_hrm-1-C14.tif	5	1	0	0
005_5fc7327e5c0bc_hrm-1-C14.tif	5	2	0	0
005_5fc7327e5c0bc_hrm-1-C14.tif	5	3	0	0
005_5fc7327e5c0bc_hrm-1-C14.tif	5	4	0	0
005_5fc7327e5c0bc_hrm-1-C14.tif	5	5	0	0
005_5fc7327e5c0bc_hrm-1-C14.tif	5	6	0	0
005_5fc7327e5c0bc_hrm-1-C14.tif	5	7	843	98
005_5fc7327e5c0bc_hrm-1-C14.tif	5	8	0	0
005_5fc7327e5c0bc_hrm-1-C14.tif	5	9	0	0
005_5fc7327e5c0bc_hrm-1-C14.tif	5	10	0	0
005_5fc7327e5c0bc_hrm-1-C14.tif	5	11	0	0
005_5fc7327e5c0bc_hrm-1-C14.tif	5	12	0	0
005_5fc7327e5c0bc_hrm-1-C14.tif	5	13	0	0
005_5fc7327e5c0bc_hrm-1-C14.tif	5	14	0	0
005_5fc7327e5c0bc_hrm-1-C14.tif	5	15	0	0
005_5fc7327e5c0bc_hrm-1-C14.tif	5	16	0	0
005_5fc7327e5c0bc_hrm-1-C14.tif	5	17	0	0
005_5fc7327e5c0bc_hrm-1-C14.tif	5	18	0	0
005_5fc7327e5c0bc_hrm-1-C14.tif	5	19	0	0
006_5fc7327e5c72d_hrm-1-C14.tif	6	1	0	0
006_5fc7327e5c72d_hrm-1-C14.tif	6	2	0	0
006_5fc7327e5c72d_hrm-1-C14.tif	6	3	0	0
006_5fc7327e5c72d_hrm-1-C14.tif	6	4	0	0
006_5fc7327e5c72d_hrm-1-C14.tif	6	5	0	0
006_5fc7327e5c72d_hrm-1-C14.tif	6	6	0	0
006_5fc7327e5c72d_hrm-1-C14.tif	6	7	0	75
006_5fc7327e5c72d_hrm-1-C14.tif	6	8	0	0
006_5fc7327e5c72d_hrm-1-C14.tif	6	9	0	0
006_5fc7327e5c72d_hrm-1-C14.tif	6	10	0	0
006_5fc7327e5c72d_hrm-1-C14.tif	6	11	0	0
006_5fc7327e5c72d_hrm-1-C14.tif	6	12	0	0
006_5fc7327e5c72d_hrm-1-C14.tif	6	13	0	0
006_5fc7327e5c72d_hrm-1-C14.tif	6	14	0	0
006_5fc7327e5c72d_hrm-1-C14.tif	6	15	0	0
006_5fc7327e5c72d_hrm-1-C14.tif	6	16	0	0
006_5fc7327e5c72d_hrm-1-C14.tif	6	17	0	0
006_5fc7327e5c72d_hrm-1-C14.tif	6	18	0	0
006_5fc7327e5c72d_hrm-1-C14.tif	6	19	0	0
006_5fc7327e5c72d_hrm-1-C14.tif	6	20	0	0
006_5fc7327e5c72d_hrm-1-C14.tif	6	21	0	744
006_5fc7327e5c72d_hrm-1-C14.tif	6	22	0	0
006_5fc7327e5c72d_hrm-1-C14.tif	6	23	0	0
006_5fc7327e5c72d_hrm-1-C14.tif	6	24	0	0
006_5fc7327e5c72d_hrm-1-C14.tif	6	25	0	0
006_5fc7327e5c72d_hrm-1-C14.tif	6	26	0	744
007_5fc7327e5ce12_hrm-1-C14.tif	7	1	0	0
007_5fc7327e5ce12_hrm-1-C14.tif	7	2	0	0
007_5fc7327e5ce12_hrm-1-C14.tif	7	3	0	0
007_5fc7327e5ce12_hrm-1-C14.tif	7	4	0	0
007_5fc7327e5ce12_hrm-1-C14.tif	7	5	0	0
007_5fc7327e5ce12_hrm-1-C14.tif	7	6	0	0
007_5fc7327e5ce12_hrm-1-C14.tif	7	7	0	0
007_5fc7327e5ce12_hrm-1-C14.tif	7	8	0	0
007_5fc7327e5ce12_hrm-1-C14.tif	7	9	0	0
007_5fc7327e5ce12_hrm-1-C14.tif	7	10	0	0
007_5fc7327e5ce12_hrm-1-C14.tif	7	11	0	0
007_5fc7327e5ce12_hrm-1-C14.tif	7	12	0	0
007_5fc7327e5ce12_hrm-1-C14.tif	7	13	0	0
007_5fc7327e5ce12_hrm-1-C14.tif	7	14	0	0
007_5fc7327e5ce12_hrm-1-C14.tif	7	15	0	0
007_5fc7327e5ce12_hrm-1-C14.tif	7	16	0	0
007_5fc7327e5ce12_hrm-1-C14.tif	7	17	0	0
007_5fc7327e5ce12_hrm-1-C14.tif	7	18	0	0
008_5fc7327e5d4b4_hrm-1-C14.tif	8	1	0	1175
008_5fc7327e5d4b4_hrm-1-C14.tif	8	2	0	0
008_5fc7327e5d4b4_hrm-1-C14.tif	8	3	0	0
008_5fc7327e5d4b4_hrm-1-C14.tif	8	4	0	0
008_5fc7327e5d4b4_hrm-1-C14.tif	8	5	0	0
008_5fc7327e5d4b4_hrm-1-C14.tif	8	6	0	0
008_5fc7327e5d4b4_hrm-1-C14.tif	8	7	0	0
009_5fc7327e5dae9_hrm-1-C14.tif	9	1	0	0
009_5fc7327e5dae9_hrm-1-C14.tif	9	2	0	0
009_5fc7327e5dae9_hrm-1-C14.tif	9	3	0	730
009_5fc7327e5dae9_hrm-1-C14.tif	9	4	0	0
009_5fc7327e5dae9_hrm-1-C14.tif	9	5	0	0
009_5fc7327e5dae9_hrm-1-C14.tif	9	6	0	0
009_5fc7327e5dae9_hrm-1-C14.tif	9	7	0	0
009_5fc7327e5dae9_hrm-1-C14.tif	9	8	0	0
009_5fc7327e5dae9_hrm-1-C14.tif	9	9	0	0
009_5fc7327e5dae9_hrm-1-C14.tif	9	10	0	0
009_5fc7327e5dae9_hrm-1-C14.tif	9	11	0	0
009_5fc7327e5dae9_hrm-1-C14.tif	9	12	0	0
009_5fc7327e5dae9_hrm-1-C14.tif	9	13	0	0
009_5fc7327e5dae9_hrm-1-C14.tif	9	14	0	0
009_5fc7327e5dae9_hrm-1-C14.tif	9	15	0	0
009_5fc7327e5dae9_hrm-1-C14.tif	9	16	0	0
009_5fc7327e5dae9_hrm-1-C14.tif	9	17	0	0
009_5fc7327e5dae9_hrm-1-C14.tif	9	18	0	0
009_5fc7327e5dae9_hrm-1-C14.tif	9	19	0	0
009_5fc7327e5dae9_hrm-1-C14.tif	9	20	0	0
009_5fc7327e5dae9_hrm-1-C14.tif	9	21	0	0
009_5fc7327e5dae9_hrm-1-C14.tif	9	22	0	0
009_5fc7327e5dae9_hrm-1-C14.tif	9	23	0	0
009_5fc7327e5dae9_hrm-1-C14.tif	9	24	0	0
009_5fc7327e5dae9_hrm-1-C14.tif	9	25	0	0
009_5fc7327e5dae9_hrm-1-C14.tif	9	26	0	0
009_5fc7327e5dae9_hrm-1-C14.tif	9	27	0	0
009_5fc7327e5dae9_hrm-1-C14.tif	9	28	0	0
009_5fc7327e5dae9_hrm-1-C14.tif	9	29	0	0
009_5fc7327e5dae9_hrm-1-C14.tif	9	30	0	0
009_5fc7327e5dae9_hrm-1-C14.tif	9	31	0	0
009_5fc7327e5dae9_hrm-1-C14.tif	9	32	0	0
009_5fc7327e5dae9_hrm-1-C14.tif	9	33	0	0
010_5fc7327e5f32f_hrm-1-C14.tif	10	1	0	0
010_5fc7327e5f32f_hrm-1-C14.tif	10	2	0	0
010_5fc7327e5f32f_hrm-1-C14.tif	10	3	0	0
010_5fc7327e5f32f_hrm-1-C14.tif	10	4	28	0
010_5fc7327e5f32f_hrm-1-C14.tif	10	5	0	0
010_5fc7327e5f32f_hrm-1-C14.tif	10	6	656	0
010_5fc7327e5f32f_hrm-1-C14.tif	10	7	0	0
010_5fc7327e5f32f_hrm-1-C14.tif	10	8	0	0
011_5fc7327e57e64_hrm-1-C14.tif	11	1	0	0
011_5fc7327e57e64_hrm-1-C14.tif	11	2	0	0
011_5fc7327e57e64_hrm-1-C14.tif	11	3	0	0
011_5fc7327e57e64_hrm-1-C14.tif	11	4	0	0
011_5fc7327e57e64_hrm-1-C14.tif	11	5	0	0
011_5fc7327e57e64_hrm-1-C14.tif	11	6	0	0
012_5fc7327e58c00_hrm-1-C14.tif	12	1	0	0
012_5fc7327e58c00_hrm-1-C14.tif	12	2	146	0
012_5fc7327e58c00_hrm-1-C14.tif	12	3	0	0
012_5fc7327e58c00_hrm-1-C14.tif	12	4	0	0
012_5fc7327e58c00_hrm-1-C14.tif	12	5	0	0
012_5fc7327e58c00_hrm-1-C14.tif	12	6	0	0
012_5fc7327e58c00_hrm-1-C14.tif	12	7	0	0
012_5fc7327e58c00_hrm-1-C14.tif	12	8	0	0
012_5fc7327e58c00_hrm-1-C14.tif	12	9	149	1769
012_5fc7327e58c00_hrm-1-C14.tif	12	10	0	0
013_5fc7327e59fa7_hrm-1-C14.tif	13	1	370	0
013_5fc7327e59fa7_hrm-1-C14.tif	13	2	0	0
013_5fc7327e59fa7_hrm-1-C14.tif	13	3	0	0
013_5fc7327e59fa7_hrm-1-C14.tif	13	4	0	0
013_5fc7327e59fa7_hrm-1-C14.tif	13	5	0	0
013_5fc7327e59fa7_hrm-1-C14.tif	13	6	0	0
013_5fc7327e59fa7_hrm-1-C14.tif	13	7	0	0
013_5fc7327e59fa7_hrm-1-C14.tif	13	8	0	0
013_5fc7327e59fa7_hrm-1-C14.tif	13	9	0	0
013_5fc7327e59fa7_hrm-1-C14.tif	13	10	0	0
013_5fc7327e59fa7_hrm-1-C14.tif	13	11	0	0
013_5fc7327e59fa7_hrm-1-C14.tif	13	12	0	0
013_5fc7327e59fa7_hrm-1-C14.tif	13	13	0	0
013_5fc7327e59fa7_hrm-1-C14.tif	13	14	0	0
013_5fc7327e59fa7_hrm-1-C14.tif	13	15	370	96
014_5fc7327e62e52_hrm-1-C14.tif	14	1	0	0
014_5fc7327e62e52_hrm-1-C14.tif	14	2	0	0
014_5fc7327e62e52_hrm-1-C14.tif	14	3	0	0
014_5fc7327e62e52_hrm-1-C14.tif	14	4	0	0
014_5fc7327e62e52_hrm-1-C14.tif	14	5	0	0
014_5fc7327e62e52_hrm-1-C14.tif	14	6	0	0
014_5fc7327e62e52_hrm-1-C14.tif	14	7	0	0
014_5fc7327e62e52_hrm-1-C14.tif	14	8	0	0
014_5fc7327e62e52_hrm-1-C14.tif	14	9	0	21
014_5fc7327e62e52_hrm-1-C14.tif	14	10	0	0
014_5fc7327e62e52_hrm-1-C14.tif	14	11	0	0
014_5fc7327e62e52_hrm-1-C14.tif	14	12	0	0
014_5fc7327e62e52_hrm-1-C14.tif	14	13	0	0
014_5fc7327e62e52_hrm-1-C14.tif	14	14	0	0
014_5fc7327e62e52_hrm-1-C14.tif	14	15	0	0
014_5fc7327e62e52_hrm-1-C14.tif	14	16	0	0
016_5fc7327e577a9_hrm-1-C14.tif	16	1	0	0
016_5fc7327e577a9_hrm-1-C14.tif	16	2	0	0
016_5fc7327e577a9_hrm-1-C14.tif	16	3	0	0
016_5fc7327e577a9_hrm-1-C14.tif	16	4	0	0
016_5fc7327e577a9_hrm-1-C14.tif	16	5	0	0
016_5fc7327e577a9_hrm-1-C14.tif	16	6	0	0
016_5fc7327e577a9_hrm-1-C14.tif	16	7	0	0
016_5fc7327e577a9_hrm-1-C14.tif	16	8	0	0
016_5fc7327e577a9_hrm-1-C14.tif	16	9	0	0
016_5fc7327e577a9_hrm-1-C14.tif	16	10	0	0
016_5fc7327e577a9_hrm-1-C14.tif	16	11	0	0
016_5fc7327e577a9_hrm-1-C14.tif	16	12	0	0
016_5fc7327e577a9_hrm-1-C14.tif	16	13	0	0
016_5fc7327e577a9_hrm-1-C14.tif	16	14	206	0
016_5fc7327e577a9_hrm-1-C14.tif	16	15	0	0
016_5fc7327e577a9_hrm-1-C14.tif	16	16	0	0
016_5fc7327e577a9_hrm-1-C14.tif	16	17	99.2	0
016_5fc7327e577a9_hrm-1-C14.tif	16	18	0	0
016_5fc7327e577a9_hrm-1-C14.tif	16	19	0	0
016_5fc7327e577a9_hrm-1-C14.tif	16	20	0	0
016_5fc7327e577a9_hrm-1-C14.tif	16	21	0	0
016_5fc7327e577a9_hrm-1-C14.tif	16	22	0	0
016_5fc7327e577a9_hrm-1-C14.tif	16	23	0	0
016_5fc7327e577a9_hrm-1-C14.tif	16	24	0	0
016_5fc7327e577a9_hrm-1-C14.tif	16	25	0	0
016_5fc7327e577a9_hrm-1-C14.tif	16	26	0	0
016_5fc7327e577a9_hrm-1-C14.tif	16	27	0	0
016_5fc7327e577a9_hrm-1-C14.tif	16	28	0	0
016_5fc7327e577a9_hrm-1-C14.tif	16	29	0	0
016_5fc7327e577a9_hrm-1-C14.tif	16	30	0	0
016_5fc7327e577a9_hrm-1-C14.tif	16	31	0	0
016_5fc7327e577a9_hrm-1-C14.tif	16	32	0	0
016_5fc7327e577a9_hrm-1-C14.tif	16	33	0	0
016_5fc7327e577a9_hrm-1-C14.tif	16	34	62	0
017_5fc7327e592aa_hrm-1-C14.tif	17	1	0	0
017_5fc7327e592aa_hrm-1-C14.tif	17	2	0	0
017_5fc7327e592aa_hrm-1-C14.tif	17	3	0	0
017_5fc7327e592aa_hrm-1-C14.tif	17	4	0	0
017_5fc7327e592aa_hrm-1-C14.tif	17	5	0	0
017_5fc7327e592aa_hrm-1-C14.tif	17	6	0	0
017_5fc7327e592aa_hrm-1-C14.tif	17	7	0	0
017_5fc7327e592aa_hrm-1-C14.tif	17	8	0	0
017_5fc7327e592aa_hrm-1-C14.tif	17	9	0	0
017_5fc7327e592aa_hrm-1-C14.tif	17	10	0	0
017_5fc7327e592aa_hrm-1-C14.tif	17	11	0	0
017_5fc7327e592aa_hrm-1-C14.tif	17	12	0	0
017_5fc7327e592aa_hrm-1-C14.tif	17	13	0	0
017_5fc7327e592aa_hrm-1-C14.tif	17	14	0	0
017_5fc7327e592aa_hrm-1-C14.tif	17	15	0	0
017_5fc7327e592aa_hrm-1-C14.tif	17	16	0	0
017_5fc7327e592aa_hrm-1-C14.tif	17	17	0	0
017_5fc7327e592aa_hrm-1-C14.tif	17	18	0	0
017_5fc7327e592aa_hrm-1-C14.tif	17	19	0	0
017_5fc7327e592aa_hrm-1-C14.tif	17	20	0	0
018A_5fc7327e610d6_hrm-1-C14.tif	18A	1	0	0
018A_5fc7327e610d6_hrm-1-C14.tif	18A	2	0	0
018A_5fc7327e610d6_hrm-1-C14.tif	18A	3	0	0
018A_5fc7327e610d6_hrm-1-C14.tif	18A	4	0	0
018A_5fc7327e610d6_hrm-1-C14.tif	18A	5	0	0
018A_5fc7327e610d6_hrm-1-C14.tif	18A	6	0	0
018A_5fc7327e610d6_hrm-1-C14.tif	18A	7	0	0
018A_5fc7327e610d6_hrm-1-C14.tif	18A	8	0	0
018A_5fc7327e610d6_hrm-1-C14.tif	18A	9	0	0
018A_5fc7327e610d6_hrm-1-C14.tif	18A	10	0	0
018A_5fc7327e610d6_hrm-1-C14.tif	18A	11	0	0
018A_5fc7327e610d6_hrm-1-C14.tif	18A	12	0	0
018A_5fc7327e610d6_hrm-1-C14.tif	18A	13	0	0
018A_5fc7327e610d6_hrm-1-C14.tif	18A	14	0	0
018A_5fc7327e610d6_hrm-1-C14.tif	18A	15	0	0
018A_5fc7327e610d6_hrm-1-C14.tif	18A	16	0	0
018A_5fc7327e610d6_hrm-1-C14.tif	18A	17	0	0
018A_5fc7327e610d6_hrm-1-C14.tif	18A	18	0	0
018A_5fc7327e610d6_hrm-1-C14.tif	18A	19	0	0
018A_5fc7327e610d6_hrm-1-C14.tif	18A	20	0	0
018A_5fc7327e610d6_hrm-1-C14.tif	18A	21	0	0
018A_5fc7327e610d6_hrm-1-C14.tif	18A	22	0	0
018A_5fc7327e610d6_hrm-1-C14.tif	18A	23	0	0
018A_5fc7327e610d6_hrm-1-C14.tif	18A	24	0	0
018A_5fc7327e610d6_hrm-1-C14.tif	18A	25	0	0
018B_5fc7327e610d6_hrm-1-C14.tif	18B	1	0	0
018B_5fc7327e610d6_hrm-1-C14.tif	18B	2	0	0
018B_5fc7327e610d6_hrm-1-C14.tif	18B	3	0	0
018B_5fc7327e610d6_hrm-1-C14.tif	18B	4	0	0
018B_5fc7327e610d6_hrm-1-C14.tif	18B	5	175	1230
018B_5fc7327e610d6_hrm-1-C14.tif	18B	6	0	0
018B_5fc7327e610d6_hrm-1-C14.tif	18B	7	0	0
018B_5fc7327e610d6_hrm-1-C14.tif	18B	8	0	0
018B_5fc7327e610d6_hrm-1-C14.tif	18B	9	0	0
018B_5fc7327e610d6_hrm-1-C14.tif	18B	10	0	0
018B_5fc7327e610d6_hrm-1-C14.tif	18B	11	189	0
018B_5fc7327e610d6_hrm-1-C14.tif	18B	12	0	0
018B_5fc7327e610d6_hrm-1-C14.tif	18B	13	0	0
018B_5fc7327e610d6_hrm-1-C14.tif	18B	14	0	0
018B_5fc7327e610d6_hrm-1-C14.tif	18B	15	0	0
019_5fc7327e5856b_hrm-1-C14.tif	19	1	0	0
019_5fc7327e5856b_hrm-1-C14.tif	19	2	0	0
019_5fc7327e5856b_hrm-1-C14.tif	19	3	0	0
019_5fc7327e5856b_hrm-1-C14.tif	19	4	0	0
019_5fc7327e5856b_hrm-1-C14.tif	19	5	0	0
019_5fc7327e5856b_hrm-1-C14.tif	19	6	0	0
019_5fc7327e5856b_hrm-1-C14.tif	19	7	0	0
019_5fc7327e5856b_hrm-1-C14.tif	19	8	0	0
019_5fc7327e5856b_hrm-1-C14.tif	19	9	0	0
019_5fc7327e5856b_hrm-1-C14.tif	19	10	0	0
019_5fc7327e5856b_hrm-1-C14.tif	19	11	0	0
019_5fc7327e5856b_hrm-1-C14.tif	19	12	0	0
019_5fc7327e5856b_hrm-1-C14.tif	19	13	0	0
019_5fc7327e5856b_hrm-1-C14.tif	19	14	0	0
019_5fc7327e5856b_hrm-1-C14.tif	19	15	0	0
019_5fc7327e5856b_hrm-1-C14.tif	19	16	0	312
019_5fc7327e5856b_hrm-1-C14.tif	19	17	0	0
019_5fc7327e5856b_hrm-1-C14.tif	19	18	0	0
019_5fc7327e5856b_hrm-1-C14.tif	19	19	0	0
020_5fc7327e5994d_hrm-1-C14.tif	20	1	0	0
020_5fc7327e5994d_hrm-1-C14.tif	20	2	0	0
020_5fc7327e5994d_hrm-1-C14.tif	20	3	0	0
020_5fc7327e5994d_hrm-1-C14.tif	20	4	0	0
020_5fc7327e5994d_hrm-1-C14.tif	20	5	0	0
020_5fc7327e5994d_hrm-1-C14.tif	20	6	0	642
020_5fc7327e5994d_hrm-1-C14.tif	20	7	0	0
020_5fc7327e5994d_hrm-1-C14.tif	20	8	0	0
020_5fc7327e5994d_hrm-1-C14.tif	20	9	0	0
020_5fc7327e5994d_hrm-1-C14.tif	20	10	0	0
020_5fc7327e5994d_hrm-1-C14.tif	20	11	107	0
020_5fc7327e5994d_hrm-1-C14.tif	20	12	0	0
020_5fc7327e5994d_hrm-1-C14.tif	20	13	0	0
020_5fc7327e5994d_hrm-1-C14.tif	20	14	0	95
020_5fc7327e5994d_hrm-1-C14.tif	20	15	0	0
020_5fc7327e5994d_hrm-1-C14.tif	20	16	0	0
020_5fc7327e5994d_hrm-1-C14.tif	20	17	0	0
020_5fc7327e5994d_hrm-1-C14.tif	20	18	0	0
020_5fc7327e5994d_hrm-1-C14.tif	20	19	0	0
020_5fc7327e5994d_hrm-1-C14.tif	20	20	0	27
020_5fc7327e5994d_hrm-1-C14.tif	20	21	0	0
020_5fc7327e5994d_hrm-1-C14.tif	20	22	0	0
020_5fc7327e5994d_hrm-1-C14.tif	20	23	0	0
020_5fc7327e5994d_hrm-1-C14.tif	20	24	0	0
020_5fc7327e5994d_hrm-1-C14.tif	20	25	0	0
020_5fc7327e5994d_hrm-1-C14.tif	20	26	0	0
021_lif_5fc7327e6356d_hrm-1-C14.tif	21	1	0	0
021_lif_5fc7327e6356d_hrm-1-C14.tif	21	2	0	0
021_lif_5fc7327e6356d_hrm-1-C14.tif	21	3	0	0
021_lif_5fc7327e6356d_hrm-1-C14.tif	21	4	0	0
021_lif_5fc7327e6356d_hrm-1-C14.tif	21	5	0	0
021_lif_5fc7327e6356d_hrm-1-C14.tif	21	6	0	231
021_lif_5fc7327e6356d_hrm-1-C14.tif	21	7	0	0
021_lif_5fc7327e6356d_hrm-1-C14.tif	21	8	0	0
021_lif_5fc7327e6356d_hrm-1-C14.tif	21	9	0	0
021_lif_5fc7327e6356d_hrm-1-C14.tif	21	10	0	0
021_lif_5fc7327e6356d_hrm-1-C14.tif	21	11	0	0
021_lif_5fc7327e6356d_hrm-1-C14.tif	21	12	0	0
021_lif_5fc7327e6356d_hrm-1-C14.tif	21	13	0	0
021_lif_5fc7327e6356d_hrm-1-C14.tif	21	14	0	0
021_lif_5fc7327e6356d_hrm-1-C14.tif	21	15	0	0
021_lif_5fc7327e6356d_hrm-1-C14.tif	21	16	0	0
021_lif_5fc7327e6356d_hrm-1-C14.tif	21	17	0	0
021_lif_5fc7327e6356d_hrm-1-C14.tif	21	18	0	0
021_lif_5fc7327e6356d_hrm-1-C14.tif	21	19	0	0
021_lif_5fc7327e6356d_hrm-1-C14.tif	21	20	0	0
021_lif_5fc7327e6356d_hrm-1-C14.tif	21	21	0	0

## Sheet: Fig.3_FS3-B_4dR_rDNAx53BP1xPML
C:\Users\Pavla\Desktop\Exp20-15-V colocal\4d WO\PNAs 150x150\C13\0.1-0.2_0.15-0.25_1.28-1.43_50+20_BCG10_2023-02-28
C:\Users\Pavla\Desktop\Exp20-15-V colocal\4d WO\PNAs 150x150\C23\0.1-0.18_0.15-0.25_50-20_1.28-1.42_bcg10_2023-02-28
			SIZE coloc	SIZE coloc		Final_colocalization of individual rDNA object with (x-53BP1_y-PML)
analyzed nucleoli_original name	ID of individual nucleoli	rDNA object ID	rDNA/53BP1	rDNA/PML
001_5fc7327e5a64f_hrm-1-C13.tif	1	1	0	0
001_5fc7327e5a64f_hrm-1-C13.tif	1	2	0	0
001_5fc7327e5a64f_hrm-1-C13.tif	1	3	0	0
001_5fc7327e5a64f_hrm-1-C13.tif	1	4	0	0
001_5fc7327e5a64f_hrm-1-C13.tif	1	5	0	0
001_5fc7327e5a64f_hrm-1-C13.tif	1	6	0	0
001_5fc7327e5a64f_hrm-1-C13.tif	1	7	0	0
001_5fc7327e5a64f_hrm-1-C13.tif	1	8	0	0
001_5fc7327e5a64f_hrm-1-C13.tif	1	9	0	0
001_5fc7327e5a64f_hrm-1-C13.tif	1	10	0	0
001_5fc7327e5a64f_hrm-1-C13.tif	1	11	0	0
001_5fc7327e5a64f_hrm-1-C13.tif	1	12	0	0
001_5fc7327e5a64f_hrm-1-C13.tif	1	13	0	0
001_5fc7327e5a64f_hrm-1-C13.tif	1	14	0	0
001_5fc7327e5a64f_hrm-1-C13.tif	1	15	0	0
001_5fc7327e5a64f_hrm-1-C13.tif	1	16	0	0
001_5fc7327e5a64f_hrm-1-C13.tif	1	17	0	0
001_5fc7327e5a64f_hrm-1-C13.tif	1	18	0	0
001_5fc7327e5a64f_hrm-1-C13.tif	1	19	0	0
001_5fc7327e5a64f_hrm-1-C13.tif	1	20	0	0
001_5fc7327e5a64f_hrm-1-C13.tif	1	21	0	0
001_5fc7327e5a64f_hrm-1-C13.tif	1	22	0	0
001_5fc7327e5a64f_hrm-1-C13.tif	1	23	0	0
001_5fc7327e5a64f_hrm-1-C13.tif	1	24	0	0
001_5fc7327e5a64f_hrm-1-C13.tif	1	25	0	0
001_5fc7327e5a64f_hrm-1-C13.tif	1	26	0	0
001_5fc7327e5a64f_hrm-1-C13.tif	1	27	0	0
001_5fc7327e5a64f_hrm-1-C13.tif	1	28	0	22
001_5fc7327e5a64f_hrm-1-C13.tif	1	29	0	70
001_5fc7327e5a64f_hrm-1-C13.tif	1	30	0	0
001_5fc7327e5a64f_hrm-1-C13.tif	1	31	0	0
001_5fc7327e5a64f_hrm-1-C13.tif	1	32	0	0
001_5fc7327e5a64f_hrm-1-C13.tif	1	33	0	0
001_5fc7327e5a64f_hrm-1-C13.tif	1	34	0	0
001_5fc7327e5a64f_hrm-1-C13.tif	1	35	0	0
001_5fc7327e5a64f_hrm-1-C13.tif	1	36	0	0
001_5fc7327e5a64f_hrm-1-C13.tif	1	37	0	0
001_5fc7327e5a64f_hrm-1-C13.tif	1	38	0	0
001_5fc7327e5a64f_hrm-1-C13.tif	1	39	0	0
001_5fc7327e5a64f_hrm-1-C13.tif	1	40	0	0
001_5fc7327e5a64f_hrm-1-C13.tif	1	41	0	0
001_5fc7327e5a64f_hrm-1-C13.tif	1	42	0	0
001_5fc7327e5a64f_hrm-1-C13.tif	1	43	0	0
001_5fc7327e5a64f_hrm-1-C13.tif	1	44	0	0
002_5fc7327e5ad1a_hrm-1-C13.tif	2	1	0	0
002_5fc7327e5ad1a_hrm-1-C13.tif	2	2	0	0
002_5fc7327e5ad1a_hrm-1-C13.tif	2	3	0	0
002_5fc7327e5ad1a_hrm-1-C13.tif	2	4	0	0
002_5fc7327e5ad1a_hrm-1-C13.tif	2	5	0	0
002_5fc7327e5ad1a_hrm-1-C13.tif	2	6	0	0
002_5fc7327e5ad1a_hrm-1-C13.tif	2	7	0	0
002_5fc7327e5ad1a_hrm-1-C13.tif	2	8	0	1116
002_5fc7327e5ad1a_hrm-1-C13.tif	2	9	0	0
002_5fc7327e5ad1a_hrm-1-C13.tif	2	10	0	0
002_5fc7327e5ad1a_hrm-1-C13.tif	2	11	0	0
002_5fc7327e5ad1a_hrm-1-C13.tif	2	12	0	0
002_5fc7327e5ad1a_hrm-1-C13.tif	2	13	0	0
002_5fc7327e5ad1a_hrm-1-C13.tif	2	14	0	0
002_5fc7327e5ad1a_hrm-1-C13.tif	2	15	0	0
002_5fc7327e5ad1a_hrm-1-C13.tif	2	16	0	0
002_5fc7327e5ad1a_hrm-1-C13.tif	2	17	0	0
002_5fc7327e5ad1a_hrm-1-C13.tif	2	18	0	0
002_5fc7327e5ad1a_hrm-1-C13.tif	2	19	0	0
002_5fc7327e5ad1a_hrm-1-C13.tif	2	20	0	0
002_5fc7327e5ad1a_hrm-1-C13.tif	2	21	0	0
003_5fc7327e5b3a0_hrm-1-C13.tif	3	1	0	0
003_5fc7327e5b3a0_hrm-1-C13.tif	3	2	0	0
003_5fc7327e5b3a0_hrm-1-C13.tif	3	3	0	0
003_5fc7327e5b3a0_hrm-1-C13.tif	3	4	0	0
003_5fc7327e5b3a0_hrm-1-C13.tif	3	5	0	0
003_5fc7327e5b3a0_hrm-1-C13.tif	3	6	0	0
003_5fc7327e5b3a0_hrm-1-C13.tif	3	7	0	0
003_5fc7327e5b3a0_hrm-1-C13.tif	3	8	0	0
003_5fc7327e5b3a0_hrm-1-C13.tif	3	9	0	0
003_5fc7327e5b3a0_hrm-1-C13.tif	3	10	0	0
003_5fc7327e5b3a0_hrm-1-C13.tif	3	11	0	0
003_5fc7327e5b3a0_hrm-1-C13.tif	3	12	0	0
003_5fc7327e5b3a0_hrm-1-C13.tif	3	13	0	0
003_5fc7327e5b3a0_hrm-1-C13.tif	3	14	0	0
003_5fc7327e5b3a0_hrm-1-C13.tif	3	15	0	0
003_5fc7327e5b3a0_hrm-1-C13.tif	3	16	2253	27.1667
003_5fc7327e5b3a0_hrm-1-C13.tif	3	17	0	0
004_5fc7327e5ba37_hrm-1-C13.tif	4	1	0	0
004_5fc7327e5ba37_hrm-1-C13.tif	4	2	0	0
004_5fc7327e5ba37_hrm-1-C13.tif	4	3	0	0
004_5fc7327e5ba37_hrm-1-C13.tif	4	4	0	0
004_5fc7327e5ba37_hrm-1-C13.tif	4	5	0	0
004_5fc7327e5ba37_hrm-1-C13.tif	4	6	0	542
004_5fc7327e5ba37_hrm-1-C13.tif	4	7	0	0
004_5fc7327e5ba37_hrm-1-C13.tif	4	8	103	0
004_5fc7327e5ba37_hrm-1-C13.tif	4	9	0	0
004_5fc7327e5ba37_hrm-1-C13.tif	4	10	395	0
004_5fc7327e5ba37_hrm-1-C13.tif	4	11	0	0
004_5fc7327e5ba37_hrm-1-C13.tif	4	12	290	0
004_5fc7327e5ba37_hrm-1-C13.tif	4	13	0	542
004_5fc7327e5ba37_hrm-1-C13.tif	4	14	0	0
004_5fc7327e5ba37_hrm-1-C13.tif	4	15	0	0
004_5fc7327e5ba37_hrm-1-C13.tif	4	16	0	0
004_5fc7327e5ba37_hrm-1-C13.tif	4	17	0	0
004_5fc7327e5ba37_hrm-1-C13.tif	4	18	0	0
004_5fc7327e5ba37_hrm-1-C13.tif	4	19	0	0
004_5fc7327e5ba37_hrm-1-C13.tif	4	20	0	0
004_5fc7327e5ba37_hrm-1-C13.tif	4	21	0	0
004_5fc7327e5ba37_hrm-1-C13.tif	4	22	0	0
004_5fc7327e5ba37_hrm-1-C13.tif	4	23	0	0
004_5fc7327e5ba37_hrm-1-C13.tif	4	24	0	0
004_5fc7327e5ba37_hrm-1-C13.tif	4	25	0	0
004_5fc7327e5ba37_hrm-1-C13.tif	4	26	0	0
004_5fc7327e5ba37_hrm-1-C13.tif	4	27	0	0
004_5fc7327e5ba37_hrm-1-C13.tif	4	28	0	0
004_5fc7327e5ba37_hrm-1-C13.tif	4	29	595	0
004_5fc7327e5ba37_hrm-1-C13.tif	4	30	595	0
004_5fc7327e5ba37_hrm-1-C13.tif	4	31	0	0
004_5fc7327e5ba37_hrm-1-C13.tif	4	32	0	0
004_5fc7327e5ba37_hrm-1-C13.tif	4	33	0	0
004_5fc7327e5ba37_hrm-1-C13.tif	4	34	0	0
004_5fc7327e5ba37_hrm-1-C13.tif	4	35	0	0
004_5fc7327e5ba37_hrm-1-C13.tif	4	36	0	0
004_5fc7327e5ba37_hrm-1-C13.tif	4	37	0	0
004_5fc7327e5ba37_hrm-1-C13.tif	4	38	103	0
004_5fc7327e5ba37_hrm-1-C13.tif	4	39	0	0
004_5fc7327e5ba37_hrm-1-C13.tif	4	40	0	0
004_5fc7327e5ba37_hrm-1-C13.tif	4	41	0	0
004_5fc7327e5ba37_hrm-1-C13.tif	4	42	0	0
005_5fc7327e5c0bc_hrm-1-C13.tif	5	1	0	0
005_5fc7327e5c0bc_hrm-1-C13.tif	5	2	0	0
005_5fc7327e5c0bc_hrm-1-C13.tif	5	3	0	0
005_5fc7327e5c0bc_hrm-1-C13.tif	5	4	0	0
005_5fc7327e5c0bc_hrm-1-C13.tif	5	5	0	0
005_5fc7327e5c0bc_hrm-1-C13.tif	5	6	0	0
005_5fc7327e5c0bc_hrm-1-C13.tif	5	7	0	0
005_5fc7327e5c0bc_hrm-1-C13.tif	5	8	0	0
005_5fc7327e5c0bc_hrm-1-C13.tif	5	9	0	0
005_5fc7327e5c0bc_hrm-1-C13.tif	5	10	0	0
005_5fc7327e5c0bc_hrm-1-C13.tif	5	11	0	0
005_5fc7327e5c0bc_hrm-1-C13.tif	5	12	0	0
005_5fc7327e5c0bc_hrm-1-C13.tif	5	13	0	0
005_5fc7327e5c0bc_hrm-1-C13.tif	5	14	0	0
005_5fc7327e5c0bc_hrm-1-C13.tif	5	15	0	0
005_5fc7327e5c0bc_hrm-1-C13.tif	5	16	0	0
005_5fc7327e5c0bc_hrm-1-C13.tif	5	17	0	0
005_5fc7327e5c0bc_hrm-1-C13.tif	5	18	0	0
005_5fc7327e5c0bc_hrm-1-C13.tif	5	19	0	0
005_5fc7327e5c0bc_hrm-1-C13.tif	5	20	0	0
005_5fc7327e5c0bc_hrm-1-C13.tif	5	21	0	0
005_5fc7327e5c0bc_hrm-1-C13.tif	5	22	0	0
005_5fc7327e5c0bc_hrm-1-C13.tif	5	23	0	0
005_5fc7327e5c0bc_hrm-1-C13.tif	5	24	0	0
005_5fc7327e5c0bc_hrm-1-C13.tif	5	25	0	0
005_5fc7327e5c0bc_hrm-1-C13.tif	5	26	0	0
005_5fc7327e5c0bc_hrm-1-C13.tif	5	27	0	0
005_5fc7327e5c0bc_hrm-1-C13.tif	5	28	0	0
005_5fc7327e5c0bc_hrm-1-C13.tif	5	29	0	0
005_5fc7327e5c0bc_hrm-1-C13.tif	5	30	0	0
005_5fc7327e5c0bc_hrm-1-C13.tif	5	31	0	0
005_5fc7327e5c0bc_hrm-1-C13.tif	5	32	0	0
005_5fc7327e5c0bc_hrm-1-C13.tif	5	33	0	0
005_5fc7327e5c0bc_hrm-1-C13.tif	5	34	0	0
005_5fc7327e5c0bc_hrm-1-C13.tif	5	35	0	0
005_5fc7327e5c0bc_hrm-1-C13.tif	5	36	0	0
005_5fc7327e5c0bc_hrm-1-C13.tif	5	37	0	0
005_5fc7327e5c0bc_hrm-1-C13.tif	5	38	0	0
005_5fc7327e5c0bc_hrm-1-C13.tif	5	39	0	0
005_5fc7327e5c0bc_hrm-1-C13.tif	5	40	0	0
005_5fc7327e5c0bc_hrm-1-C13.tif	5	41	0	0
005_5fc7327e5c0bc_hrm-1-C13.tif	5	42	0	0
005_5fc7327e5c0bc_hrm-1-C13.tif	5	43	0	0
005_5fc7327e5c0bc_hrm-1-C13.tif	5	44	90	395
005_5fc7327e5c0bc_hrm-1-C13.tif	5	45	0	0
005_5fc7327e5c0bc_hrm-1-C13.tif	5	46	0	0
005_5fc7327e5c0bc_hrm-1-C13.tif	5	47	0	0
005_5fc7327e5c0bc_hrm-1-C13.tif	5	48	0	0
005_5fc7327e5c0bc_hrm-1-C13.tif	5	49	0	0
005_5fc7327e5c0bc_hrm-1-C13.tif	5	50	0	395
006_5fc7327e5c72d_hrm-1-C13.tif	6	1	0	0
006_5fc7327e5c72d_hrm-1-C13.tif	6	2	0	0
006_5fc7327e5c72d_hrm-1-C13.tif	6	3	0	0
006_5fc7327e5c72d_hrm-1-C13.tif	6	4	0	0
006_5fc7327e5c72d_hrm-1-C13.tif	6	5	0	0
006_5fc7327e5c72d_hrm-1-C13.tif	6	6	0	0
006_5fc7327e5c72d_hrm-1-C13.tif	6	7	0	0
006_5fc7327e5c72d_hrm-1-C13.tif	6	8	0	0
006_5fc7327e5c72d_hrm-1-C13.tif	6	9	0	0
006_5fc7327e5c72d_hrm-1-C13.tif	6	10	0	0
006_5fc7327e5c72d_hrm-1-C13.tif	6	11	0	0
006_5fc7327e5c72d_hrm-1-C13.tif	6	12	0	0
006_5fc7327e5c72d_hrm-1-C13.tif	6	13	0	0
006_5fc7327e5c72d_hrm-1-C13.tif	6	14	0	744
006_5fc7327e5c72d_hrm-1-C13.tif	6	15	0	0
006_5fc7327e5c72d_hrm-1-C13.tif	6	16	0	0
006_5fc7327e5c72d_hrm-1-C13.tif	6	17	0	0
006_5fc7327e5c72d_hrm-1-C13.tif	6	18	0	0
006_5fc7327e5c72d_hrm-1-C13.tif	6	19	0	0
006_5fc7327e5c72d_hrm-1-C13.tif	6	20	0	0
006_5fc7327e5c72d_hrm-1-C13.tif	6	21	0	0
006_5fc7327e5c72d_hrm-1-C13.tif	6	22	0	28
006_5fc7327e5c72d_hrm-1-C13.tif	6	23	0	0
006_5fc7327e5c72d_hrm-1-C13.tif	6	24	0	0
006_5fc7327e5c72d_hrm-1-C13.tif	6	25	0	0
007_5fc7327e5ce12_hrm-1-C13.tif	7	1	0	0
007_5fc7327e5ce12_hrm-1-C13.tif	7	2	0	0
007_5fc7327e5ce12_hrm-1-C13.tif	7	3	0	0
007_5fc7327e5ce12_hrm-1-C13.tif	7	4	0	0
007_5fc7327e5ce12_hrm-1-C13.tif	7	5	0	0
007_5fc7327e5ce12_hrm-1-C13.tif	7	6	0	0
007_5fc7327e5ce12_hrm-1-C13.tif	7	7	0	0
007_5fc7327e5ce12_hrm-1-C13.tif	7	8	0	0
007_5fc7327e5ce12_hrm-1-C13.tif	7	9	0	0
007_5fc7327e5ce12_hrm-1-C13.tif	7	10	0	0
007_5fc7327e5ce12_hrm-1-C13.tif	7	11	0	0
007_5fc7327e5ce12_hrm-1-C13.tif	7	12	0	0
007_5fc7327e5ce12_hrm-1-C13.tif	7	13	0	0
007_5fc7327e5ce12_hrm-1-C13.tif	7	14	0	0
007_5fc7327e5ce12_hrm-1-C13.tif	7	15	0	0
007_5fc7327e5ce12_hrm-1-C13.tif	7	16	0	0
007_5fc7327e5ce12_hrm-1-C13.tif	7	17	0	0
007_5fc7327e5ce12_hrm-1-C13.tif	7	18	0	0
007_5fc7327e5ce12_hrm-1-C13.tif	7	19	0	0
007_5fc7327e5ce12_hrm-1-C13.tif	7	20	0	0
007_5fc7327e5ce12_hrm-1-C13.tif	7	21	0	0
007_5fc7327e5ce12_hrm-1-C13.tif	7	22	0	0
007_5fc7327e5ce12_hrm-1-C13.tif	7	23	0	0
007_5fc7327e5ce12_hrm-1-C13.tif	7	24	0	0
007_5fc7327e5ce12_hrm-1-C13.tif	7	25	0	0
007_5fc7327e5ce12_hrm-1-C13.tif	7	26	0	0
007_5fc7327e5ce12_hrm-1-C13.tif	7	27	0	0
007_5fc7327e5ce12_hrm-1-C13.tif	7	28	0	0
007_5fc7327e5ce12_hrm-1-C13.tif	7	29	0	0
007_5fc7327e5ce12_hrm-1-C13.tif	7	30	0	0
007_5fc7327e5ce12_hrm-1-C13.tif	7	31	0	0
007_5fc7327e5ce12_hrm-1-C13.tif	7	32	0	0
007_5fc7327e5ce12_hrm-1-C13.tif	7	33	0	0
007_5fc7327e5ce12_hrm-1-C13.tif	7	34	57	0
007_5fc7327e5ce12_hrm-1-C13.tif	7	35	0	0
008_5fc7327e5d4b4_hrm-1-C13.tif	8	1	0	0
008_5fc7327e5d4b4_hrm-1-C13.tif	8	2	0	0
008_5fc7327e5d4b4_hrm-1-C13.tif	8	3	0	0
008_5fc7327e5d4b4_hrm-1-C13.tif	8	4	0	0
008_5fc7327e5d4b4_hrm-1-C13.tif	8	5	0	0
008_5fc7327e5d4b4_hrm-1-C13.tif	8	6	0	0
008_5fc7327e5d4b4_hrm-1-C13.tif	8	7	0	0
008_5fc7327e5d4b4_hrm-1-C13.tif	8	8	0	0
008_5fc7327e5d4b4_hrm-1-C13.tif	8	9	0	0
008_5fc7327e5d4b4_hrm-1-C13.tif	8	10	0	0
008_5fc7327e5d4b4_hrm-1-C13.tif	8	11	56	1175
008_5fc7327e5d4b4_hrm-1-C13.tif	8	12	0	1175
008_5fc7327e5d4b4_hrm-1-C13.tif	8	13	0	0
008_5fc7327e5d4b4_hrm-1-C13.tif	8	14	0	0
008_5fc7327e5d4b4_hrm-1-C13.tif	8	15	0	0
009_5fc7327e5dae9_hrm-1-C13.tif	9	1	0	0
009_5fc7327e5dae9_hrm-1-C13.tif	9	2	0	0
009_5fc7327e5dae9_hrm-1-C13.tif	9	3	0	0
009_5fc7327e5dae9_hrm-1-C13.tif	9	4	0	0
009_5fc7327e5dae9_hrm-1-C13.tif	9	5	0	0
009_5fc7327e5dae9_hrm-1-C13.tif	9	6	0	0
009_5fc7327e5dae9_hrm-1-C13.tif	9	7	0	0
009_5fc7327e5dae9_hrm-1-C13.tif	9	8	0	0
009_5fc7327e5dae9_hrm-1-C13.tif	9	9	0	0
009_5fc7327e5dae9_hrm-1-C13.tif	9	10	0	0
009_5fc7327e5dae9_hrm-1-C13.tif	9	11	0	0
009_5fc7327e5dae9_hrm-1-C13.tif	9	12	0	0
009_5fc7327e5dae9_hrm-1-C13.tif	9	13	0	0
009_5fc7327e5dae9_hrm-1-C13.tif	9	14	0	0
009_5fc7327e5dae9_hrm-1-C13.tif	9	15	0	0
009_5fc7327e5dae9_hrm-1-C13.tif	9	16	0	0
009_5fc7327e5dae9_hrm-1-C13.tif	9	17	0	0
009_5fc7327e5dae9_hrm-1-C13.tif	9	18	0	0
009_5fc7327e5dae9_hrm-1-C13.tif	9	19	0	0
009_5fc7327e5dae9_hrm-1-C13.tif	9	20	0	0
009_5fc7327e5dae9_hrm-1-C13.tif	9	21	0	0
009_5fc7327e5dae9_hrm-1-C13.tif	9	22	0	0
009_5fc7327e5dae9_hrm-1-C13.tif	9	23	0	0
009_5fc7327e5dae9_hrm-1-C13.tif	9	24	0	0
009_5fc7327e5dae9_hrm-1-C13.tif	9	25	0	0
009_5fc7327e5dae9_hrm-1-C13.tif	9	26	0	0
009_5fc7327e5dae9_hrm-1-C13.tif	9	27	0	730
009_5fc7327e5dae9_hrm-1-C13.tif	9	28	0	0
009_5fc7327e5dae9_hrm-1-C13.tif	9	29	0	0
009_5fc7327e5dae9_hrm-1-C13.tif	9	30	0	0
009_5fc7327e5dae9_hrm-1-C13.tif	9	31	0	0
009_5fc7327e5dae9_hrm-1-C13.tif	9	32	0	0
009_5fc7327e5dae9_hrm-1-C13.tif	9	33	0	0
009_5fc7327e5dae9_hrm-1-C13.tif	9	34	0	0
009_5fc7327e5dae9_hrm-1-C13.tif	9	35	0	0
009_5fc7327e5dae9_hrm-1-C13.tif	9	36	0	0
009_5fc7327e5dae9_hrm-1-C13.tif	9	37	0	0
009_5fc7327e5dae9_hrm-1-C13.tif	9	38	0	0
009_5fc7327e5dae9_hrm-1-C13.tif	9	39	0	0
009_5fc7327e5dae9_hrm-1-C13.tif	9	40	0	0
009_5fc7327e5dae9_hrm-1-C13.tif	9	41	0	0
009_5fc7327e5dae9_hrm-1-C13.tif	9	42	0	0
009_5fc7327e5dae9_hrm-1-C13.tif	9	43	0	0
009_5fc7327e5dae9_hrm-1-C13.tif	9	44	0	0
009_5fc7327e5dae9_hrm-1-C13.tif	9	45	0	0
009_5fc7327e5dae9_hrm-1-C13.tif	9	46	0	0
009_5fc7327e5dae9_hrm-1-C13.tif	9	47	0	0
009_5fc7327e5dae9_hrm-1-C13.tif	9	48	0	0
009_5fc7327e5dae9_hrm-1-C13.tif	9	49	0	0
009_5fc7327e5dae9_hrm-1-C13.tif	9	50	0	0
009_5fc7327e5dae9_hrm-1-C13.tif	9	51	0	0
009_5fc7327e5dae9_hrm-1-C13.tif	9	52	0	0
010_5fc7327e5f32f_hrm-1-C13.tif	10	1	0	0
010_5fc7327e5f32f_hrm-1-C13.tif	10	2	0	0
010_5fc7327e5f32f_hrm-1-C13.tif	10	3	0	0
010_5fc7327e5f32f_hrm-1-C13.tif	10	4	0	0
010_5fc7327e5f32f_hrm-1-C13.tif	10	5	656	0
010_5fc7327e5f32f_hrm-1-C13.tif	10	6	0	0
010_5fc7327e5f32f_hrm-1-C13.tif	10	7	0	0
010_5fc7327e5f32f_hrm-1-C13.tif	10	8	0	0
010_5fc7327e5f32f_hrm-1-C13.tif	10	9	0	0
010_5fc7327e5f32f_hrm-1-C13.tif	10	10	0	0
010_5fc7327e5f32f_hrm-1-C13.tif	10	11	0	0
010_5fc7327e5f32f_hrm-1-C13.tif	10	12	0	0
010_5fc7327e5f32f_hrm-1-C13.tif	10	13	0	0
010_5fc7327e5f32f_hrm-1-C13.tif	10	14	0	0
010_5fc7327e5f32f_hrm-1-C13.tif	10	15	0	0
010_5fc7327e5f32f_hrm-1-C13.tif	10	16	0	0
010_5fc7327e5f32f_hrm-1-C13.tif	10	17	0	0
010_5fc7327e5f32f_hrm-1-C13.tif	10	18	0	0
010_5fc7327e5f32f_hrm-1-C13.tif	10	19	28	0
011_5fc7327e57e64_hrm-1-C13.tif	11	1	0	0
011_5fc7327e57e64_hrm-1-C13.tif	11	2	0	0
011_5fc7327e57e64_hrm-1-C13.tif	11	3	0	0
011_5fc7327e57e64_hrm-1-C13.tif	11	4	0	0
011_5fc7327e57e64_hrm-1-C13.tif	11	5	0	0
011_5fc7327e57e64_hrm-1-C13.tif	11	6	0	0
011_5fc7327e57e64_hrm-1-C13.tif	11	7	0	0
011_5fc7327e57e64_hrm-1-C13.tif	11	8	0	0
011_5fc7327e57e64_hrm-1-C13.tif	11	9	0	0
011_5fc7327e57e64_hrm-1-C13.tif	11	10	0	542
011_5fc7327e57e64_hrm-1-C13.tif	11	11	0	0
011_5fc7327e57e64_hrm-1-C13.tif	11	12	0	0
011_5fc7327e57e64_hrm-1-C13.tif	11	13	0	0
011_5fc7327e57e64_hrm-1-C13.tif	11	14	0	0
011_5fc7327e57e64_hrm-1-C13.tif	11	15	0	0
011_5fc7327e57e64_hrm-1-C13.tif	11	16	0	0
011_5fc7327e57e64_hrm-1-C13.tif	11	17	142	0
011_5fc7327e57e64_hrm-1-C13.tif	11	18	0	0
011_5fc7327e57e64_hrm-1-C13.tif	11	19	0	0
011_5fc7327e57e64_hrm-1-C13.tif	11	20	0	0
011_5fc7327e57e64_hrm-1-C13.tif	11	21	0	0
011_5fc7327e57e64_hrm-1-C13.tif	11	22	0	0
011_5fc7327e57e64_hrm-1-C13.tif	11	23	0	0
011_5fc7327e57e64_hrm-1-C13.tif	11	24	0	0
011_5fc7327e57e64_hrm-1-C13.tif	11	25	0	0
011_5fc7327e57e64_hrm-1-C13.tif	11	26	0	0
011_5fc7327e57e64_hrm-1-C13.tif	11	27	0	0
011_5fc7327e57e64_hrm-1-C13.tif	11	28	0	0
011_5fc7327e57e64_hrm-1-C13.tif	11	29	0	0
011_5fc7327e57e64_hrm-1-C13.tif	11	30	0	0
011_5fc7327e57e64_hrm-1-C13.tif	11	31	0	0
011_5fc7327e57e64_hrm-1-C13.tif	11	32	0	0
011_5fc7327e57e64_hrm-1-C13.tif	11	33	0	0
011_5fc7327e57e64_hrm-1-C13.tif	11	34	0	0
011_5fc7327e57e64_hrm-1-C13.tif	11	35	1082	0
011_5fc7327e57e64_hrm-1-C13.tif	11	36	0	0
011_5fc7327e57e64_hrm-1-C13.tif	11	37	0	0
011_5fc7327e57e64_hrm-1-C13.tif	11	38	0	0
011_5fc7327e57e64_hrm-1-C13.tif	11	39	0	0
011_5fc7327e57e64_hrm-1-C13.tif	11	40	0	0
011_5fc7327e57e64_hrm-1-C13.tif	11	41	0	0
012_5fc7327e58c00_hrm-1-C13.tif	12	1	0	0
012_5fc7327e58c00_hrm-1-C13.tif	12	2	0	0
012_5fc7327e58c00_hrm-1-C13.tif	12	3	0	0
012_5fc7327e58c00_hrm-1-C13.tif	12	4	0	1769
012_5fc7327e58c00_hrm-1-C13.tif	12	5	0	0
012_5fc7327e58c00_hrm-1-C13.tif	12	6	0	0
012_5fc7327e58c00_hrm-1-C13.tif	12	7	0	0
012_5fc7327e58c00_hrm-1-C13.tif	12	8	0	0
012_5fc7327e58c00_hrm-1-C13.tif	12	9	0	0
012_5fc7327e58c00_hrm-1-C13.tif	12	10	0	0
012_5fc7327e58c00_hrm-1-C13.tif	12	11	0	0
012_5fc7327e58c00_hrm-1-C13.tif	12	12	0	0
012_5fc7327e58c00_hrm-1-C13.tif	12	13	0	0
012_5fc7327e58c00_hrm-1-C13.tif	12	14	0	0
012_5fc7327e58c00_hrm-1-C13.tif	12	15	0	0
012_5fc7327e58c00_hrm-1-C13.tif	12	16	0	0
012_5fc7327e58c00_hrm-1-C13.tif	12	17	0	0
012_5fc7327e58c00_hrm-1-C13.tif	12	18	0	0
012_5fc7327e58c00_hrm-1-C13.tif	12	19	0	0
012_5fc7327e58c00_hrm-1-C13.tif	12	20	0	0
012_5fc7327e58c00_hrm-1-C13.tif	12	21	0	0
012_5fc7327e58c00_hrm-1-C13.tif	12	22	0	0
012_5fc7327e58c00_hrm-1-C13.tif	12	23	0	0
013_5fc7327e59fa7_hrm-1-C13.tif	13	1	0	0
013_5fc7327e59fa7_hrm-1-C13.tif	13	2	0	0
013_5fc7327e59fa7_hrm-1-C13.tif	13	3	0	0
013_5fc7327e59fa7_hrm-1-C13.tif	13	4	0	0
013_5fc7327e59fa7_hrm-1-C13.tif	13	5	0	0
013_5fc7327e59fa7_hrm-1-C13.tif	13	6	0	0
013_5fc7327e59fa7_hrm-1-C13.tif	13	7	0	0
013_5fc7327e59fa7_hrm-1-C13.tif	13	8	0	0
013_5fc7327e59fa7_hrm-1-C13.tif	13	9	0	0
013_5fc7327e59fa7_hrm-1-C13.tif	13	10	0	0
013_5fc7327e59fa7_hrm-1-C13.tif	13	11	0	517
013_5fc7327e59fa7_hrm-1-C13.tif	13	12	0	0
013_5fc7327e59fa7_hrm-1-C13.tif	13	13	0	0
013_5fc7327e59fa7_hrm-1-C13.tif	13	14	0	0
013_5fc7327e59fa7_hrm-1-C13.tif	13	15	0	0
013_5fc7327e59fa7_hrm-1-C13.tif	13	16	0	0
013_5fc7327e59fa7_hrm-1-C13.tif	13	17	0	0
013_5fc7327e59fa7_hrm-1-C13.tif	13	18	0	0
013_5fc7327e59fa7_hrm-1-C13.tif	13	19	0	0
013_5fc7327e59fa7_hrm-1-C13.tif	13	20	0	0
013_5fc7327e59fa7_hrm-1-C13.tif	13	21	0	0
013_5fc7327e59fa7_hrm-1-C13.tif	13	22	0	0
013_5fc7327e59fa7_hrm-1-C13.tif	13	23	0	517
013_5fc7327e59fa7_hrm-1-C13.tif	13	24	0	0
013_5fc7327e59fa7_hrm-1-C13.tif	13	25	0	0
013_5fc7327e59fa7_hrm-1-C13.tif	13	26	0	0
013_5fc7327e59fa7_hrm-1-C13.tif	13	27	0	0
013_5fc7327e59fa7_hrm-1-C13.tif	13	28	0	0
013_5fc7327e59fa7_hrm-1-C13.tif	13	29	0	0
013_5fc7327e59fa7_hrm-1-C13.tif	13	30	0	0
013_5fc7327e59fa7_hrm-1-C13.tif	13	31	0	0
013_5fc7327e59fa7_hrm-1-C13.tif	13	32	0	0
013_5fc7327e59fa7_hrm-1-C13.tif	13	33	0	0
013_5fc7327e59fa7_hrm-1-C13.tif	13	34	0	0
013_5fc7327e59fa7_hrm-1-C13.tif	13	35	0	0
013_5fc7327e59fa7_hrm-1-C13.tif	13	36	0	0
013_5fc7327e59fa7_hrm-1-C13.tif	13	37	0	0
013_5fc7327e59fa7_hrm-1-C13.tif	13	38	0	0
013_5fc7327e59fa7_hrm-1-C13.tif	13	39	0	0
013_5fc7327e59fa7_hrm-1-C13.tif	13	40	0	0
013_5fc7327e59fa7_hrm-1-C13.tif	13	41	0	0
013_5fc7327e59fa7_hrm-1-C13.tif	13	42	0	0
013_5fc7327e59fa7_hrm-1-C13.tif	13	43	0	0
013_5fc7327e59fa7_hrm-1-C13.tif	13	44	0	0
013_5fc7327e59fa7_hrm-1-C13.tif	13	45	0	0
013_5fc7327e59fa7_hrm-1-C13.tif	13	46	0	0
013_5fc7327e59fa7_hrm-1-C13.tif	13	47	0	0
013_5fc7327e59fa7_hrm-1-C13.tif	13	48	0	0
013_5fc7327e59fa7_hrm-1-C13.tif	13	49	370	96
013_5fc7327e59fa7_hrm-1-C13.tif	13	50	0	0
013_5fc7327e59fa7_hrm-1-C13.tif	13	51	0	0
014_5fc7327e62e52_hrm-1-C13.tif	14	1	0	0
014_5fc7327e62e52_hrm-1-C13.tif	14	2	0	0
014_5fc7327e62e52_hrm-1-C13.tif	14	3	0	0
014_5fc7327e62e52_hrm-1-C13.tif	14	4	0	0
014_5fc7327e62e52_hrm-1-C13.tif	14	5	0	0
014_5fc7327e62e52_hrm-1-C13.tif	14	6	0	0
014_5fc7327e62e52_hrm-1-C13.tif	14	7	0	0
014_5fc7327e62e52_hrm-1-C13.tif	14	8	0	0
014_5fc7327e62e52_hrm-1-C13.tif	14	9	0	0
014_5fc7327e62e52_hrm-1-C13.tif	14	10	0	0
014_5fc7327e62e52_hrm-1-C13.tif	14	11	0	0
014_5fc7327e62e52_hrm-1-C13.tif	14	12	0	0
014_5fc7327e62e52_hrm-1-C13.tif	14	13	0	0
014_5fc7327e62e52_hrm-1-C13.tif	14	14	0	0
014_5fc7327e62e52_hrm-1-C13.tif	14	15	0	0
014_5fc7327e62e52_hrm-1-C13.tif	14	16	0	0
014_5fc7327e62e52_hrm-1-C13.tif	14	17	0	0
014_5fc7327e62e52_hrm-1-C13.tif	14	18	0	0
014_5fc7327e62e52_hrm-1-C13.tif	14	19	0	0
014_5fc7327e62e52_hrm-1-C13.tif	14	20	0	0
014_5fc7327e62e52_hrm-1-C13.tif	14	21	0	0
014_5fc7327e62e52_hrm-1-C13.tif	14	22	0	0
014_5fc7327e62e52_hrm-1-C13.tif	14	23	0	0
014_5fc7327e62e52_hrm-1-C13.tif	14	24	0	0
014_5fc7327e62e52_hrm-1-C13.tif	14	25	0	0
014_5fc7327e62e52_hrm-1-C13.tif	14	26	0	0
014_5fc7327e62e52_hrm-1-C13.tif	14	27	0	0
014_5fc7327e62e52_hrm-1-C13.tif	14	28	0	0
014_5fc7327e62e52_hrm-1-C13.tif	14	29	0	397
014_5fc7327e62e52_hrm-1-C13.tif	14	30	0	147
016_5fc7327e577a9_hrm-1-C13.tif	16	1	0	0
016_5fc7327e577a9_hrm-1-C13.tif	16	2	0	0
016_5fc7327e577a9_hrm-1-C13.tif	16	3	0	0
016_5fc7327e577a9_hrm-1-C13.tif	16	4	0	0
016_5fc7327e577a9_hrm-1-C13.tif	16	5	0	0
016_5fc7327e577a9_hrm-1-C13.tif	16	6	0	0
016_5fc7327e577a9_hrm-1-C13.tif	16	7	0	0
016_5fc7327e577a9_hrm-1-C13.tif	16	8	0	0
016_5fc7327e577a9_hrm-1-C13.tif	16	9	0	0
016_5fc7327e577a9_hrm-1-C13.tif	16	10	0	0
016_5fc7327e577a9_hrm-1-C13.tif	16	11	0	0
016_5fc7327e577a9_hrm-1-C13.tif	16	12	0	0
016_5fc7327e577a9_hrm-1-C13.tif	16	13	0	0
016_5fc7327e577a9_hrm-1-C13.tif	16	14	0	0
016_5fc7327e577a9_hrm-1-C13.tif	16	15	0	25
016_5fc7327e577a9_hrm-1-C13.tif	16	16	0	0
016_5fc7327e577a9_hrm-1-C13.tif	16	17	0	0
016_5fc7327e577a9_hrm-1-C13.tif	16	18	0	0
016_5fc7327e577a9_hrm-1-C13.tif	16	19	0	0
016_5fc7327e577a9_hrm-1-C13.tif	16	20	0	0
016_5fc7327e577a9_hrm-1-C13.tif	16	21	0	0
016_5fc7327e577a9_hrm-1-C13.tif	16	22	0	0
016_5fc7327e577a9_hrm-1-C13.tif	16	23	0	0
016_5fc7327e577a9_hrm-1-C13.tif	16	24	0	0
016_5fc7327e577a9_hrm-1-C13.tif	16	25	56	0
016_5fc7327e577a9_hrm-1-C13.tif	16	26	0	0
016_5fc7327e577a9_hrm-1-C13.tif	16	27	0	0
016_5fc7327e577a9_hrm-1-C13.tif	16	28	0	0
016_5fc7327e577a9_hrm-1-C13.tif	16	29	0	0
016_5fc7327e577a9_hrm-1-C13.tif	16	30	0	0
016_5fc7327e577a9_hrm-1-C13.tif	16	31	0	0
016_5fc7327e577a9_hrm-1-C13.tif	16	32	0	0
017_5fc7327e592aa_hrm-1-C13.tif	17	1	0	0
017_5fc7327e592aa_hrm-1-C13.tif	17	2	0	0
017_5fc7327e592aa_hrm-1-C13.tif	17	3	0	0
017_5fc7327e592aa_hrm-1-C13.tif	17	4	0	0
017_5fc7327e592aa_hrm-1-C13.tif	17	5	0	0
017_5fc7327e592aa_hrm-1-C13.tif	17	6	0	0
017_5fc7327e592aa_hrm-1-C13.tif	17	7	0	0
017_5fc7327e592aa_hrm-1-C13.tif	17	8	0	0
017_5fc7327e592aa_hrm-1-C13.tif	17	9	0	0
017_5fc7327e592aa_hrm-1-C13.tif	17	10	0	0
017_5fc7327e592aa_hrm-1-C13.tif	17	11	0	140
017_5fc7327e592aa_hrm-1-C13.tif	17	12	0	0
017_5fc7327e592aa_hrm-1-C13.tif	17	13	0	0
017_5fc7327e592aa_hrm-1-C13.tif	17	14	0	0
017_5fc7327e592aa_hrm-1-C13.tif	17	15	0	0
017_5fc7327e592aa_hrm-1-C13.tif	17	16	0	0
017_5fc7327e592aa_hrm-1-C13.tif	17	17	0	0
018A_5fc7327e610d6_hrm-1-C13.tif	18A	1	0	0
018A_5fc7327e610d6_hrm-1-C13.tif	18A	2	0	0
018A_5fc7327e610d6_hrm-1-C13.tif	18A	3	0	0
018A_5fc7327e610d6_hrm-1-C13.tif	18A	4	0	0
018B_5fc7327e610d6_hrm-1-C13.tif	18B	1	0	0
018B_5fc7327e610d6_hrm-1-C13.tif	18B	2	0	0
018B_5fc7327e610d6_hrm-1-C13.tif	18B	3	0	0
018B_5fc7327e610d6_hrm-1-C13.tif	18B	4	0	0
019_5fc7327e5856b_hrm-1-C13.tif	19	1	0	0
019_5fc7327e5856b_hrm-1-C13.tif	19	2	0	0
019_5fc7327e5856b_hrm-1-C13.tif	19	3	0	0
019_5fc7327e5856b_hrm-1-C13.tif	19	4	0	0
019_5fc7327e5856b_hrm-1-C13.tif	19	5	0	0
019_5fc7327e5856b_hrm-1-C13.tif	19	6	0	0
019_5fc7327e5856b_hrm-1-C13.tif	19	7	0	0
019_5fc7327e5856b_hrm-1-C13.tif	19	8	0	0
019_5fc7327e5856b_hrm-1-C13.tif	19	9	0	0
019_5fc7327e5856b_hrm-1-C13.tif	19	10	0	0
019_5fc7327e5856b_hrm-1-C13.tif	19	11	0	0
019_5fc7327e5856b_hrm-1-C13.tif	19	12	0	0
019_5fc7327e5856b_hrm-1-C13.tif	19	13	0	0
019_5fc7327e5856b_hrm-1-C13.tif	19	14	0	0
019_5fc7327e5856b_hrm-1-C13.tif	19	15	0	0
019_5fc7327e5856b_hrm-1-C13.tif	19	16	0	0
019_5fc7327e5856b_hrm-1-C13.tif	19	17	0	0
019_5fc7327e5856b_hrm-1-C13.tif	19	18	0	0
019_5fc7327e5856b_hrm-1-C13.tif	19	19	0	0
019_5fc7327e5856b_hrm-1-C13.tif	19	20	0	0
019_5fc7327e5856b_hrm-1-C13.tif	19	21	0	0
019_5fc7327e5856b_hrm-1-C13.tif	19	22	0	0
019_5fc7327e5856b_hrm-1-C13.tif	19	23	0	0
019_5fc7327e5856b_hrm-1-C13.tif	19	24	0	0
019_5fc7327e5856b_hrm-1-C13.tif	19	25	0	312
019_5fc7327e5856b_hrm-1-C13.tif	19	26	0	0
019_5fc7327e5856b_hrm-1-C13.tif	19	27	0	0
019_5fc7327e5856b_hrm-1-C13.tif	19	28	0	0
020_5fc7327e5994d_hrm-1-C13.tif	20	1	0	0
020_5fc7327e5994d_hrm-1-C13.tif	20	2	0	0
020_5fc7327e5994d_hrm-1-C13.tif	20	3	0	0
020_5fc7327e5994d_hrm-1-C13.tif	20	4	0	0
020_5fc7327e5994d_hrm-1-C13.tif	20	5	0	0
020_5fc7327e5994d_hrm-1-C13.tif	20	6	0	0
020_5fc7327e5994d_hrm-1-C13.tif	20	7	0	0
020_5fc7327e5994d_hrm-1-C13.tif	20	8	0	0
020_5fc7327e5994d_hrm-1-C13.tif	20	9	0	0
020_5fc7327e5994d_hrm-1-C13.tif	20	10	0	0
020_5fc7327e5994d_hrm-1-C13.tif	20	11	0	0
020_5fc7327e5994d_hrm-1-C13.tif	20	12	0	0
020_5fc7327e5994d_hrm-1-C13.tif	20	13	0	0
020_5fc7327e5994d_hrm-1-C13.tif	20	14	0	0
020_5fc7327e5994d_hrm-1-C13.tif	20	15	0	0
020_5fc7327e5994d_hrm-1-C13.tif	20	16	0	0
020_5fc7327e5994d_hrm-1-C13.tif	20	17	0	0
020_5fc7327e5994d_hrm-1-C13.tif	20	18	0	0
020_5fc7327e5994d_hrm-1-C13.tif	20	19	0	609
020_5fc7327e5994d_hrm-1-C13.tif	20	20	0	0
020_5fc7327e5994d_hrm-1-C13.tif	20	21	0	0
020_5fc7327e5994d_hrm-1-C13.tif	20	22	362	0
020_5fc7327e5994d_hrm-1-C13.tif	20	23	0	47
020_5fc7327e5994d_hrm-1-C13.tif	20	24	0	0
020_5fc7327e5994d_hrm-1-C13.tif	20	25	0	0
020_5fc7327e5994d_hrm-1-C13.tif	20	26	0	0
020_5fc7327e5994d_hrm-1-C13.tif	20	27	0	0
020_5fc7327e5994d_hrm-1-C13.tif	20	28	0	0
021_lif_5fc7327e6356d_hrm-1-C13.tif	21	1	0	0
021_lif_5fc7327e6356d_hrm-1-C13.tif	21	2	0	0
021_lif_5fc7327e6356d_hrm-1-C13.tif	21	3	0	0
021_lif_5fc7327e6356d_hrm-1-C13.tif	21	4	0	0
021_lif_5fc7327e6356d_hrm-1-C13.tif	21	5	0	0
021_lif_5fc7327e6356d_hrm-1-C13.tif	21	6	0	0
021_lif_5fc7327e6356d_hrm-1-C13.tif	21	7	0	0
021_lif_5fc7327e6356d_hrm-1-C13.tif	21	8	0	0
021_lif_5fc7327e6356d_hrm-1-C13.tif	21	9	0	0
021_lif_5fc7327e6356d_hrm-1-C13.tif	21	10	0	0
021_lif_5fc7327e6356d_hrm-1-C13.tif	21	11	0	0
021_lif_5fc7327e6356d_hrm-1-C13.tif	21	12	0	0
021_lif_5fc7327e6356d_hrm-1-C13.tif	21	13	0	0
021_lif_5fc7327e6356d_hrm-1-C13.tif	21	14	0	0
021_lif_5fc7327e6356d_hrm-1-C13.tif	21	15	0	0
021_lif_5fc7327e6356d_hrm-1-C13.tif	21	16	0	0
021_lif_5fc7327e6356d_hrm-1-C13.tif	21	17	0	0
021_lif_5fc7327e6356d_hrm-1-C13.tif	21	18	0	0
021_lif_5fc7327e6356d_hrm-1-C13.tif	21	19	0	0
021_lif_5fc7327e6356d_hrm-1-C13.tif	21	20	89	0
021_lif_5fc7327e6356d_hrm-1-C13.tif	21	21	0	0
021_lif_5fc7327e6356d_hrm-1-C13.tif	21	22	0	0
021_lif_5fc7327e6356d_hrm-1-C13.tif	21	23	0	0
021_lif_5fc7327e6356d_hrm-1-C13.tif	21	24	0	0
021_lif_5fc7327e6356d_hrm-1-C13.tif	21	25	0	0
021_lif_5fc7327e6356d_hrm-1-C13.tif	21	26	0	0
021_lif_5fc7327e6356d_hrm-1-C13.tif	21	27	0	0
021_lif_5fc7327e6356d_hrm-1-C13.tif	21	28	0	0
021_lif_5fc7327e6356d_hrm-1-C13.tif	21	29	0	0
021_lif_5fc7327e6356d_hrm-1-C13.tif	21	30	0	0
021_lif_5fc7327e6356d_hrm-1-C13.tif	21	31	0	0
021_lif_5fc7327e6356d_hrm-1-C13.tif	21	32	0	0
021_lif_5fc7327e6356d_hrm-1-C13.tif	21	33	0	0
021_lif_5fc7327e6356d_hrm-1-C13.tif	21	34	0	0
021_lif_5fc7327e6356d_hrm-1-C13.tif	21	35	0	0
021_lif_5fc7327e6356d_hrm-1-C13.tif	21	36	0	0
021_lif_5fc7327e6356d_hrm-1-C13.tif	21	37	0	0
021_lif_5fc7327e6356d_hrm-1-C13.tif	21	38	0	0
021_lif_5fc7327e6356d_hrm-1-C13.tif	21	39	0	0
021_lif_5fc7327e6356d_hrm-1-C13.tif	21	40	0	0
021_lif_5fc7327e6356d_hrm-1-C13.tif	21	41	0	0
021_lif_5fc7327e6356d_hrm-1-C13.tif	21	42	0	0
021_lif_5fc7327e6356d_hrm-1-C13.tif	21	43	0	0
021_lif_5fc7327e6356d_hrm-1-C13.tif	21	44	0	0
021_lif_5fc7327e6356d_hrm-1-C13.tif	21	45	0	0
021_lif_5fc7327e6356d_hrm-1-C13.tif	21	46	0	0
021_lif_5fc7327e6356d_hrm-1-C13.tif	21	47	0	0
021_lif_5fc7327e6356d_hrm-1-C13.tif	21	48	0	0
021_lif_5fc7327e6356d_hrm-1-C13.tif	21	49	0	0
021_lif_5fc7327e6356d_hrm-1-C13.tif	21	50	0	0
021_lif_5fc7327e6356d_hrm-1-C13.tif	21	51	0	0
021_lif_5fc7327e6356d_hrm-1-C13.tif	21	52	0	0
021_lif_5fc7327e6356d_hrm-1-C13.tif	21	53	0	0
021_lif_5fc7327e6356d_hrm-1-C13.tif	21	54	0	0
021_lif_5fc7327e6356d_hrm-1-C13.tif	21	55	0	0
021_lif_5fc7327e6356d_hrm-1-C13.tif	21	56	0	0
021_lif_5fc7327e6356d_hrm-1-C13.tif	21	57	0	0
021_lif_5fc7327e6356d_hrm-1-C13.tif	21	58	0	0
021_lif_5fc7327e6356d_hrm-1-C13.tif	21	59	0	0
019_5fc7327e5856b_hrm-1-C13.tif	19	20		0
019_5fc7327e5856b_hrm-1-C13.tif	19	21		0
019_5fc7327e5856b_hrm-1-C13.tif	19	22		0
019_5fc7327e5856b_hrm-1-C13.tif	19	23		0
019_5fc7327e5856b_hrm-1-C13.tif	19	24		0
019_5fc7327e5856b_hrm-1-C13.tif	19	25		0
019_5fc7327e5856b_hrm-1-C13.tif	19	26		0
019_5fc7327e5856b_hrm-1-C13.tif	19	27		0
019_5fc7327e5856b_hrm-1-C13.tif	19	28		0
019_5fc7327e5856b_hrm-1-C13.tif	19	29		0
019_5fc7327e5856b_hrm-1-C13.tif	19	30		0
019_5fc7327e5856b_hrm-1-C13.tif	19	31		0
019_5fc7327e5856b_hrm-1-C13.tif	19	32		0
019_5fc7327e5856b_hrm-1-C13.tif	19	33		0
019_5fc7327e5856b_hrm-1-C13.tif	19	34		0
020_5fc7327e5994d_hrm-1-C13.tif	20	1		47
020_5fc7327e5994d_hrm-1-C13.tif	20	2		0
020_5fc7327e5994d_hrm-1-C13.tif	20	3		0
020_5fc7327e5994d_hrm-1-C13.tif	20	4		0
020_5fc7327e5994d_hrm-1-C13.tif	20	5		0
020_5fc7327e5994d_hrm-1-C13.tif	20	6		0
020_5fc7327e5994d_hrm-1-C13.tif	20	7		0
020_5fc7327e5994d_hrm-1-C13.tif	20	8		0
020_5fc7327e5994d_hrm-1-C13.tif	20	9		0
020_5fc7327e5994d_hrm-1-C13.tif	20	10		0
020_5fc7327e5994d_hrm-1-C13.tif	20	11		0
020_5fc7327e5994d_hrm-1-C13.tif	20	12		0
020_5fc7327e5994d_hrm-1-C13.tif	20	13		0
020_5fc7327e5994d_hrm-1-C13.tif	20	14		0
020_5fc7327e5994d_hrm-1-C13.tif	20	15		0
020_5fc7327e5994d_hrm-1-C13.tif	20	16		0
020_5fc7327e5994d_hrm-1-C13.tif	20	17		0
020_5fc7327e5994d_hrm-1-C13.tif	20	18		0
020_5fc7327e5994d_hrm-1-C13.tif	20	19		0
020_5fc7327e5994d_hrm-1-C13.tif	20	20		0
020_5fc7327e5994d_hrm-1-C13.tif	20	21	0	0
020_5fc7327e5994d_hrm-1-C13.tif	20	22	0	0
020_5fc7327e5994d_hrm-1-C13.tif	20	23	0	0
020_5fc7327e5994d_hrm-1-C13.tif	20	24	0	0
020_5fc7327e5994d_hrm-1-C13.tif	20	25	0	0
020_5fc7327e5994d_hrm-1-C13.tif	20	26	0	0
020_5fc7327e5994d_hrm-1-C13.tif	20	27	0	0
020_5fc7327e5994d_hrm-1-C13.tif	20	28	0	0
020_5fc7327e5994d_hrm-1-C13.tif	20	29	0	0
020_5fc7327e5994d_hrm-1-C13.tif	20	30	0	0
020_5fc7327e5994d_hrm-1-C13.tif	20	31	0	0
020_5fc7327e5994d_hrm-1-C13.tif	20	32	0	0
020_5fc7327e5994d_hrm-1-C13.tif	20	33	0	0
020_5fc7327e5994d_hrm-1-C13.tif	20	34	0	0
020_5fc7327e5994d_hrm-1-C13.tif	20	35	0	0
020_5fc7327e5994d_hrm-1-C13.tif	20	36	362	0
021_lif_5fc7327e6356d_hrm-1-C13.tif	21	1	0	0
021_lif_5fc7327e6356d_hrm-1-C13.tif	21	2	0	0
021_lif_5fc7327e6356d_hrm-1-C13.tif	21	3	0	0
021_lif_5fc7327e6356d_hrm-1-C13.tif	21	4	0	0
021_lif_5fc7327e6356d_hrm-1-C13.tif	21	5	0	0
021_lif_5fc7327e6356d_hrm-1-C13.tif	21	6	0	0
021_lif_5fc7327e6356d_hrm-1-C13.tif	21	7	0	0
021_lif_5fc7327e6356d_hrm-1-C13.tif	21	8	0	0
021_lif_5fc7327e6356d_hrm-1-C13.tif	21	9	0	0
021_lif_5fc7327e6356d_hrm-1-C13.tif	21	10	0	0
021_lif_5fc7327e6356d_hrm-1-C13.tif	21	11	0	0
021_lif_5fc7327e6356d_hrm-1-C13.tif	21	12	0	0
021_lif_5fc7327e6356d_hrm-1-C13.tif	21	13	0	0
021_lif_5fc7327e6356d_hrm-1-C13.tif	21	14	0	0
021_lif_5fc7327e6356d_hrm-1-C13.tif	21	15	0	0
021_lif_5fc7327e6356d_hrm-1-C13.tif	21	16	0	0
021_lif_5fc7327e6356d_hrm-1-C13.tif	21	17	0	0
021_lif_5fc7327e6356d_hrm-1-C13.tif	21	18	0	0
021_lif_5fc7327e6356d_hrm-1-C13.tif	21	19	0	0
021_lif_5fc7327e6356d_hrm-1-C13.tif	21	20	0	0
021_lif_5fc7327e6356d_hrm-1-C13.tif	21	21	0	0
021_lif_5fc7327e6356d_hrm-1-C13.tif	21	22	0	0
021_lif_5fc7327e6356d_hrm-1-C13.tif	21	23	0	0
021_lif_5fc7327e6356d_hrm-1-C13.tif	21	24	0	0
021_lif_5fc7327e6356d_hrm-1-C13.tif	21	25	0	0
021_lif_5fc7327e6356d_hrm-1-C13.tif	21	26	0	0
021_lif_5fc7327e6356d_hrm-1-C13.tif	21	27	834	0
021_lif_5fc7327e6356d_hrm-1-C13.tif	21	28	0	0
021_lif_5fc7327e6356d_hrm-1-C13.tif	21	29	163	0
021_lif_5fc7327e6356d_hrm-1-C13.tif	21	30	0	0
021_lif_5fc7327e6356d_hrm-1-C13.tif	21	31	0	0
021_lif_5fc7327e6356d_hrm-1-C13.tif	21	32	0	0
021_lif_5fc7327e6356d_hrm-1-C13.tif	21	33	0	0
021_lif_5fc7327e6356d_hrm-1-C13.tif	21	34	0	0
021_lif_5fc7327e6356d_hrm-1-C13.tif	21	35	0	0
021_lif_5fc7327e6356d_hrm-1-C13.tif	21	36	0	0
021_lif_5fc7327e6356d_hrm-1-C13.tif	21	37	0	0
021_lif_5fc7327e6356d_hrm-1-C13.tif	21	38	0	0
021_lif_5fc7327e6356d_hrm-1-C13.tif	21	39	0	0
021_lif_5fc7327e6356d_hrm-1-C13.tif	21	40	0	0
021_lif_5fc7327e6356d_hrm-1-C13.tif	21	41	0	0
021_lif_5fc7327e6356d_hrm-1-C13.tif	21	42	0	0
021_lif_5fc7327e6356d_hrm-1-C13.tif	21	43	0	0
021_lif_5fc7327e6356d_hrm-1-C13.tif	21	44	0	0
021_lif_5fc7327e6356d_hrm-1-C13.tif	21	45	0	0
021_lif_5fc7327e6356d_hrm-1-C13.tif	21	46	0	0
021_lif_5fc7327e6356d_hrm-1-C13.tif	21	47	0	0
021_lif_5fc7327e6356d_hrm-1-C13.tif	21	48	0	0
021_lif_5fc7327e6356d_hrm-1-C13.tif	21	49	0	0
021_lif_5fc7327e6356d_hrm-1-C13.tif	21	50	0	0
021_lif_5fc7327e6356d_hrm-1-C13.tif	21	51	0	0
021_lif_5fc7327e6356d_hrm-1-C13.tif	21	52	0	0
021_lif_5fc7327e6356d_hrm-1-C13.tif	21	53	0	0
021_lif_5fc7327e6356d_hrm-1-C13.tif	21	54	0	0
021_lif_5fc7327e6356d_hrm-1-C13.tif	21	55	0	0
021_lif_5fc7327e6356d_hrm-1-C13.tif	21	56	0	0
021_lif_5fc7327e6356d_hrm-1-C13.tif	21	57	0	0
021_lif_5fc7327e6356d_hrm-1-C13.tif	21	58	0	0
021_lif_5fc7327e6356d_hrm-1-C13.tif	21	59	0	0
021_lif_5fc7327e6356d_hrm-1-C13.tif	21	60	0	0
021_lif_5fc7327e6356d_hrm-1-C13.tif	21	61	0	0
021_lif_5fc7327e6356d_hrm-1-C13.tif	21	62	0	0
021_lif_5fc7327e6356d_hrm-1-C13.tif	21	63	89	0
021_lif_5fc7327e6356d_hrm-1-C13.tif	21	64	0	0
021_lif_5fc7327e6356d_hrm-1-C13.tif	21	65	0	0
021_lif_5fc7327e6356d_hrm-1-C13.tif	21	66	0	0
021_lif_5fc7327e6356d_hrm-1-C13.tif	21	67	0	0
021_lif_5fc7327e6356d_hrm-1-C13.tif	21	68	0	0
021_lif_5fc7327e6356d_hrm-1-C13.tif	21	69	0	0
021_lif_5fc7327e6356d_hrm-1-C13.tif	21	70	0	0
021_lif_5fc7327e6356d_hrm-1-C13.tif	21	71	0	0
021_lif_5fc7327e6356d_hrm-1-C13.tif	21	72	0	0
021_lif_5fc7327e6356d_hrm-1-C13.tif	21	73	0	0

## Sheet: Fig.3_FS3-B_1dR_DJx53BP1xPML
							Final_colocalization of individual DJ object with (x-53BP1_y-PML)
			SIZE coloc	SIZE coloc
analyzed nucleoli_original name	ID of individual nucleoli	DJ object ID	DJ/53BP1	DJ/PML
10_5fc65d1e5a8bc-C14.tif	10	1	0	0
10_5fc65d1e5a8bc-C14.tif	10	2	0	0
10_5fc65d1e5a8bc-C14.tif	10	3	0	0
10_5fc65d1e5a8bc-C14.tif	10	4	0	0
10_5fc65d1e5a8bc-C14.tif	10	5	0	0
10_5fc65d1e5a8bc-C14.tif	10	6	0	0
10_5fc65d1e5a8bc-C14.tif	10	7	0	0
10_5fc65d1e5a8bc-C14.tif	10	8	0	0
10_5fc65d1e5a8bc-C14.tif	10	9	0	0
11_5fc65d1e62785-C14.tif	11	1	0	0
11_5fc65d1e62785-C14.tif	11	2	0	0
11_5fc65d1e62785-C14.tif	11	3	0	0
11_5fc65d1e62785-C14.tif	11	4	0	0
11_5fc65d1e62785-C14.tif	11	5	0	0
11_5fc65d1e62785-C14.tif	11	6	0	0
11_5fc65d1e62785-C14.tif	11	7	0	0
11_5fc65d1e62785-C14.tif	11	8	0	0
11_5fc65d1e62785-C14.tif	11	9	0	0
11_5fc65d1e62785-C14.tif	11	10	0	0
11_5fc65d1e62785-C14.tif	11	11	0	0
11_5fc65d1e62785-C14.tif	11	12	0	0
11_5fc65d1e62785-C14.tif	11	13	0	0
12_5fc65d1e61357-C14.tif	12	1	0	0
12_5fc65d1e61357-C14.tif	12	2	0	0
12_5fc65d1e61357-C14.tif	12	3	231	1599
12_5fc65d1e61357-C14.tif	12	4	0	0
12_5fc65d1e61357-C14.tif	12	5	0	0
12_5fc65d1e61357-C14.tif	12	6	0	1599
12_5fc65d1e61357-C14.tif	12	7	0	0
12_5fc65d1e61357-C14.tif	12	8	0	1599
13_5fc65d1e60604-C14.tif	13	1	0	0
13_5fc65d1e60604-C14.tif	13	2	0	0
13_5fc65d1e60604-C14.tif	13	3	0	141
13_5fc65d1e60604-C14.tif	13	4	0	0
13_5fc65d1e60604-C14.tif	13	5	0	0
13_5fc65d1e60604-C14.tif	13	6	0	0
13_5fc65d1e60604-C14.tif	13	7	0	0
14B_5fc65d1e6840f-C14.tif	14B	1	0	0
14B_5fc65d1e6840f-C14.tif	14B	2	0	0
14B_5fc65d1e6840f-C14.tif	14B	3	0	0
14B_5fc65d1e6840f-C14.tif	14B	4	0	0
14B_5fc65d1e6840f-C14.tif	14B	5	0	0
14B_5fc65d1e6840f-C14.tif	14B	6	0	20
14B_5fc65d1e6840f-C14.tif	14B	7	0	0
14B_5fc65d1e6840f-C14.tif	14B	8	0	0
14B_5fc65d1e6840f-C14.tif	14B	9	0	0
14B_5fc65d1e6840f-C14.tif	14B	10	0	0
14B_5fc65d1e6840f-C14.tif	14B	11	0	0
14B_5fc65d1e6840f-C14.tif	14B	12	0	0
14B_5fc65d1e6840f-C14.tif	14B	13	0	0
14_5fc65d1e6840f-C14.tif	14	1	0	0
14_5fc65d1e6840f-C14.tif	14	2	0	0
14_5fc65d1e6840f-C14.tif	14	3	0	0
14_5fc65d1e6840f-C14.tif	14	4	0	0
14_5fc65d1e6840f-C14.tif	14	5	0	0
15_5fc65d1e675a3-C14.tif	15	1	0	0
15_5fc65d1e675a3-C14.tif	15	2	0	0
15_5fc65d1e675a3-C14.tif	15	3	0	0
15_5fc65d1e675a3-C14.tif	15	4	0	0
15_5fc65d1e675a3-C14.tif	15	5	0	0
15_5fc65d1e675a3-C14.tif	15	6	123	0
15_5fc65d1e675a3-C14.tif	15	7	0	0
16A_5fc65d1e662ff-C14.tif	16A	1	67	0
16A_5fc65d1e662ff-C14.tif	16A	2	0	997
16A_5fc65d1e662ff-C14.tif	16A	3	0	0
16A_5fc65d1e662ff-C14.tif	16A	4	0	0
16A_5fc65d1e662ff-C14.tif	16A	5	0	0
16A_5fc65d1e662ff-C14.tif	16A	6	0	0
16A_5fc65d1e662ff-C14.tif	16A	7	0	0
16A_5fc65d1e662ff-C14.tif	16A	8	0	0
16A_5fc65d1e662ff-C14.tif	16A	9	0	0
16A_5fc65d1e662ff-C14.tif	16A	10	0	0
16B_5fc65d1e662ff-C14.tif	16B	1	0	0
16B_5fc65d1e662ff-C14.tif	16B	2	0	855
17_5fc65d1e655e4-C14.tif	17	1	0	0
17_5fc65d1e655e4-C14.tif	17	2	0	0
17_5fc65d1e655e4-C14.tif	17	3	0	0
17_5fc65d1e655e4-C14.tif	17	4	0	0
17_5fc65d1e655e4-C14.tif	17	5	0	804
17_5fc65d1e655e4-C14.tif	17	6	0	0
17_5fc65d1e655e4-C14.tif	17	7	0	0
17_5fc65d1e655e4-C14.tif	17	8	0	0
17_5fc65d1e655e4-C14.tif	17	9	0	0
17_5fc65d1e655e4-C14.tif	17	10	0	0
17_5fc65d1e655e4-C14.tif	17	11	0	0
17_5fc65d1e655e4-C14.tif	17	12	196	58
17_5fc65d1e655e4-C14.tif	17	13	0	0
17_5fc65d1e655e4-C14.tif	17	14	0	0
18_5fc65d1e634ae-C14.tif	18	1	0	0
18_5fc65d1e634ae-C14.tif	18	2	0	0
18_5fc65d1e634ae-C14.tif	18	3	0	0
18_5fc65d1e634ae-C14.tif	18	4	0	53
18_5fc65d1e634ae-C14.tif	18	5	0	0
18_5fc65d1e634ae-C14.tif	18	6	0	0
18_5fc65d1e634ae-C14.tif	18	7	0	0
18_5fc65d1e634ae-C14.tif	18	8	0	0
18_5fc65d1e634ae-C14.tif	18	9	0	0
18_5fc65d1e634ae-C14.tif	18	10	0	0
18_5fc65d1e634ae-C14.tif	18	11	0	0
18_5fc65d1e634ae-C14.tif	18	12	0	0
18_5fc65d1e634ae-C14.tif	18	13	0	0
18_5fc65d1e634ae-C14.tif	18	14	0	0
18_5fc65d1e634ae-C14.tif	18	15	495	0
19_5fc65d1e620d6-C14.tif	19	1	0	891
19_5fc65d1e620d6-C14.tif	19	2	0	0
19_5fc65d1e620d6-C14.tif	19	3	0	0
19_5fc65d1e620d6-C14.tif	19	4	0	0
19_5fc65d1e620d6-C14.tif	19	5	0	0
19_5fc65d1e620d6-C14.tif	19	6	0	0
19_5fc65d1e620d6-C14.tif	19	7	0	0
19_5fc65d1e620d6-C14.tif	19	8	0	0
19_5fc65d1e620d6-C14.tif	19	9	0	0
19_5fc65d1e620d6-C14.tif	19	10	0	0
19_5fc65d1e620d6-C14.tif	19	11	0	0
1_5fc65d1e551fc-C14.tif	1	1	0	0
1_5fc65d1e551fc-C14.tif	1	2	0	0
1_5fc65d1e551fc-C14.tif	1	3	0	0
1_5fc65d1e551fc-C14.tif	1	4	0	0
1_5fc65d1e551fc-C14.tif	1	5	0	578
1_5fc65d1e551fc-C14.tif	1	6	0	0
1_5fc65d1e551fc-C14.tif	1	7	0	0
1_5fc65d1e551fc-C14.tif	1	8	0	0
1_5fc65d1e551fc-C14.tif	1	9	0	0
1_5fc65d1e551fc-C14.tif	1	10	370	0
1_5fc65d1e551fc-C14.tif	1	11	0	31
1_5fc65d1e551fc-C14.tif	1	12	0	0
1_5fc65d1e551fc-C14.tif	1	13	0	0
1_5fc65d1e551fc-C14.tif	1	14	445	0
1_5fc65d1e551fc-C14.tif	1	15	0	0
1_5fc65d1e551fc-C14.tif	1	16	0	0
1_5fc65d1e551fc-C14.tif	1	17	0	0
20_5fc65d1e65c70-C14.tif	20	1	0	0
20_5fc65d1e65c70-C14.tif	20	2	0	0
20_5fc65d1e65c70-C14.tif	20	3	0	0
20_5fc65d1e65c70-C14.tif	20	4	0	0
20_5fc65d1e65c70-C14.tif	20	5	0	0
20_5fc65d1e65c70-C14.tif	20	6	0	0
21_5fc65d1e64f72-C14.tif	21	1	0	0
21_5fc65d1e64f72-C14.tif	21	2	0	0
21_5fc65d1e64f72-C14.tif	21	3	0	0
21_5fc65d1e64f72-C14.tif	21	4	0	0
21_5fc65d1e64f72-C14.tif	21	5	0	0
21_5fc65d1e64f72-C14.tif	21	6	0	0
21_5fc65d1e64f72-C14.tif	21	7	0	0
21_5fc65d1e64f72-C14.tif	21	8	0	0
21_5fc65d1e64f72-C14.tif	21	9	0	0
21_5fc65d1e64f72-C14.tif	21	10	0	0
21_5fc65d1e64f72-C14.tif	21	11	0	0
21_5fc65d1e64f72-C14.tif	21	12	0	0
21_5fc65d1e64f72-C14.tif	21	13	0	0
21_5fc65d1e64f72-C14.tif	21	14	0	0
21_5fc65d1e64f72-C14.tif	21	15	0	0
21_5fc65d1e64f72-C14.tif	21	16	0	0
21_5fc65d1e64f72-C14.tif	21	17	0	0
21_5fc65d1e64f72-C14.tif	21	18	0	0
21_5fc65d1e64f72-C14.tif	21	19	0	0
21_5fc65d1e64f72-C14.tif	21	20	0	0
21_5fc65d1e64f72-C14.tif	21	21	0	0
21_5fc65d1e64f72-C14.tif	21	22	0	0
21_5fc65d1e64f72-C14.tif	21	23	0	0
21_5fc65d1e64f72-C14.tif	21	24	0	0
22_5fc65d1e62e24-C14.tif	22	1	0	0
22_5fc65d1e62e24-C14.tif	22	2	0	0
23_5fc65d1e61a0f-C14.tif	23	1	74	0
23_5fc65d1e61a0f-C14.tif	23	2	0	0
23_5fc65d1e61a0f-C14.tif	23	3	0	0
23_5fc65d1e61a0f-C14.tif	23	4	0	0
23_5fc65d1e61a0f-C14.tif	23	5	0	0
23_5fc65d1e61a0f-C14.tif	23	6	0	0
23_5fc65d1e61a0f-C14.tif	23	7	0	0
23_5fc65d1e61a0f-C14.tif	23	8	321	474
23_5fc65d1e61a0f-C14.tif	23	9	0	0
23_5fc65d1e61a0f-C14.tif	23	10	0	0
23_5fc65d1e61a0f-C14.tif	23	11	0	0
23_5fc65d1e61a0f-C14.tif	23	12	0	0
23_5fc65d1e61a0f-C14.tif	23	13	0	0
23_5fc65d1e61a0f-C14.tif	23	14	0	0
24_5fc65d1e5ff38-C14.tif	24	1	275	759
24_5fc65d1e5ff38-C14.tif	24	2	0	0
24_5fc65d1e5ff38-C14.tif	24	3	0	0
24_5fc65d1e5ff38-C14.tif	24	4	0	0
24_5fc65d1e5ff38-C14.tif	24	5	0	0
24_5fc65d1e5ff38-C14.tif	24	6	0	0
24_5fc65d1e5ff38-C14.tif	24	7	0	0
24_5fc65d1e5ff38-C14.tif	24	8	0	0
24_5fc65d1e5ff38-C14.tif	24	9	0	0
24_5fc65d1e5ff38-C14.tif	24	10	0	0
24_5fc65d1e5ff38-C14.tif	24	11	0	0
24_5fc65d1e5ff38-C14.tif	24	12	0	0
25_5fc65d1e5f8a4-C14.tif	25	1	25	0
25_5fc65d1e5f8a4-C14.tif	25	2	0	0
25_5fc65d1e5f8a4-C14.tif	25	3	0	0
25_5fc65d1e5f8a4-C14.tif	25	4	0	0
25_5fc65d1e5f8a4-C14.tif	25	5	0	0
25_5fc65d1e5f8a4-C14.tif	25	6	0	0
25_5fc65d1e5f8a4-C14.tif	25	7	0	0
25_5fc65d1e5f8a4-C14.tif	25	8	0	0
25_5fc65d1e5f8a4-C14.tif	25	9	0	0
25_5fc65d1e5f8a4-C14.tif	25	10	0	0
25_5fc65d1e5f8a4-C14.tif	25	11	0	0
25_5fc65d1e5f8a4-C14.tif	25	12	0	0
26_5fc65d1e5f1ca-C14.tif	26	1	0	0
26_5fc65d1e5f1ca-C14.tif	26	2	0	633
26_5fc65d1e5f1ca-C14.tif	26	3	0	0
26_5fc65d1e5f1ca-C14.tif	26	4	0	0
26_5fc65d1e5f1ca-C14.tif	26	5	0	0
27_5fc65d1e5eb4f-C14.tif	27	1	0	0
27_5fc65d1e5eb4f-C14.tif	27	2	0	0
27_5fc65d1e5eb4f-C14.tif	27	3	0	0
27_5fc65d1e5eb4f-C14.tif	27	4	65	48
27_5fc65d1e5eb4f-C14.tif	27	5	0	0
27_5fc65d1e5eb4f-C14.tif	27	6	0	0
27_5fc65d1e5eb4f-C14.tif	27	7	0	0
27_5fc65d1e5eb4f-C14.tif	27	8	0	0
27_5fc65d1e5eb4f-C14.tif	27	9	143	0
29_5fc65d1e5e4a5-C14.tif	29	1	0	0
29_5fc65d1e5e4a5-C14.tif	29	2	0	0
29_5fc65d1e5e4a5-C14.tif	29	3	0	66
29_5fc65d1e5e4a5-C14.tif	29	4	0	0
29_5fc65d1e5e4a5-C14.tif	29	5	0	44
29_5fc65d1e5e4a5-C14.tif	29	6	0	0
29_5fc65d1e5e4a5-C14.tif	29	7	0	0
29_5fc65d1e5e4a5-C14.tif	29	8	0	0
29_5fc65d1e5e4a5-C14.tif	29	9	0	0
2_5fc65d1e59b8d-C14.tif	2	1	0	0
2_5fc65d1e59b8d-C14.tif	2	2	0	0
2_5fc65d1e59b8d-C14.tif	2	3	0	0
2_5fc65d1e59b8d-C14.tif	2	4	0	0
2_5fc65d1e59b8d-C14.tif	2	5	0	0
2_5fc65d1e59b8d-C14.tif	2	6	0	0
2_5fc65d1e59b8d-C14.tif	2	7	0	0
2_5fc65d1e59b8d-C14.tif	2	8	0	0
2_5fc65d1e59b8d-C14.tif	2	9	0	0
2_5fc65d1e59b8d-C14.tif	2	10	0	0
2_5fc65d1e59b8d-C14.tif	2	11	0	0
2_5fc65d1e59b8d-C14.tif	2	12	0	0
2_5fc65d1e59b8d-C14.tif	2	13	0	0
2_5fc65d1e59b8d-C14.tif	2	14	0	0
2_5fc65d1e59b8d-C14.tif	2	15	0	0
2_5fc65d1e59b8d-C14.tif	2	16	0	0
30_5fc65d1e5d74a-C14.tif	30	1	0	0
30_5fc65d1e5d74a-C14.tif	30	2	0	0
30_5fc65d1e5d74a-C14.tif	30	3	0	0
30_5fc65d1e5d74a-C14.tif	30	4	0	0
30_5fc65d1e5d74a-C14.tif	30	5	0	0
31_5fc65d1e5d0ba-C14.tif	31	1	0	0
31_5fc65d1e5d0ba-C14.tif	31	2	0	1338
31_5fc65d1e5d0ba-C14.tif	31	3	0	0
31_5fc65d1e5d0ba-C14.tif	31	4	0	0
32_5fc65d1e5ca1a-C14.tif	32	1	0	1477
32_5fc65d1e5ca1a-C14.tif	32	2	0	0
32_5fc65d1e5ca1a-C14.tif	32	3	0	0
32_5fc65d1e5ca1a-C14.tif	32	4	0	0
32_5fc65d1e5ca1a-C14.tif	32	5	0	0
32_5fc65d1e5ca1a-C14.tif	32	6	0	0
32_5fc65d1e5ca1a-C14.tif	32	7	0	0
32_5fc65d1e5ca1a-C14.tif	32	8	0	0
32_5fc65d1e5ca1a-C14.tif		9	0	0
33_5fc65d1e5bce9-C14.tif	33	1	0	0
33_5fc65d1e5bce9-C14.tif	33	2	0	0
33_5fc65d1e5bce9-C14.tif	33	3	0	0
33_5fc65d1e5bce9-C14.tif	33	4	0	891
33_5fc65d1e5bce9-C14.tif	33	5	0	324
33_5fc65d1e5bce9-C14.tif	33	6	0	0
33_5fc65d1e5bce9-C14.tif	33	7	0	0
33_5fc65d1e5bce9-C14.tif	33	8	0	0
33_5fc65d1e5bce9-C14.tif	33	9	0	0
33_5fc65d1e5bce9-C14.tif	33	10	0	0
33_5fc65d1e5bce9-C14.tif	33	11	0	0
33_5fc65d1e5bce9-C14.tif	33	12	0	749
34_5fc65d1e56594-C14.tif	34	1	0	0
34_5fc65d1e56594-C14.tif	34	2	0	0
34_5fc65d1e56594-C14.tif	34	3	0	0
34_5fc65d1e56594-C14.tif	34	4	0	0
34_5fc65d1e56594-C14.tif	34	5	0	0
34_5fc65d1e56594-C14.tif	34	6	0	0
34_5fc65d1e56594-C14.tif	34	7	0	0
34_5fc65d1e56594-C14.tif	34	8	0	0
34_5fc65d1e56594-C14.tif	34	9	0	0
34_5fc65d1e56594-C14.tif	34	10	0	0
34_5fc65d1e56594-C14.tif	34	11	0	0
34_5fc65d1e56594-C14.tif	34	12	0	0
34_5fc65d1e56594-C14.tif	34	13	0	0
34_5fc65d1e56594-C14.tif	34	14	0	0
34_5fc65d1e56594-C14.tif	34	15	0	0
35_5fc65d1e55867-C14.tif	35	1	0	0
35_5fc65d1e55867-C14.tif	35	2	0	0
35_5fc65d1e55867-C14.tif	35	3	0	0
35_5fc65d1e55867-C14.tif	35	4	0	0
35_5fc65d1e55867-C14.tif	35	5	0	0
35_5fc65d1e55867-C14.tif	35	6	0	1220
35_5fc65d1e55867-C14.tif	35	7	0	0
36_5fc65d1e54314-C14.tif	36	1	0	0
36_5fc65d1e54314-C14.tif	36	2	0	0
36_5fc65d1e54314-C14.tif	36	3	0	1561
36_5fc65d1e54314-C14.tif	36	4	0	0
36_5fc65d1e54314-C14.tif	36	5	0	0
36_5fc65d1e54314-C14.tif	36	6	0	0
36_5fc65d1e54314-C14.tif	36	7	0	0
36_5fc65d1e54314-C14.tif	36	8	0	0
37_5fc65d1e587d7-C14.tif	37	1	0	0
37_5fc65d1e587d7-C14.tif	37	2	0	0
37_5fc65d1e587d7-C14.tif	37	3	0	0
37_5fc65d1e587d7-C14.tif	37	4	0	0
37_5fc65d1e587d7-C14.tif	37	5	0	0
37_5fc65d1e587d7-C14.tif	37	6	273	0
37_5fc65d1e587d7-C14.tif	37	7	0	0
3_5fc65d1e58e54-C14.tif	3	1	0	0
3_5fc65d1e58e54-C14.tif	3	2	0	0
3_5fc65d1e58e54-C14.tif	3	3	0	0
3_5fc65d1e58e54-C14.tif	3	4	0	0
3_5fc65d1e58e54-C14.tif	3	5	0	0
3_5fc65d1e58e54-C14.tif	3	6	0	0
3_5fc65d1e58e54-C14.tif	3	7	0	930
3_5fc65d1e58e54-C14.tif	3	8	0	0
3_5fc65d1e58e54-C14.tif	3	9	0	0
4_5fc65d1e56d38-C14.tif	4	1	161	86
4_5fc65d1e56d38-C14.tif	4	2	0	0
5_5fc65d1e55ef9-C14.tif	5	1	0	0
5_5fc65d1e55ef9-C14.tif	5	2	0	0
5_5fc65d1e55ef9-C14.tif	5	3	0	0
5_5fc65d1e55ef9-C14.tif	5	4	0	0
5_5fc65d1e55ef9-C14.tif	5	5	0	0
6_5fc65d1e54a3f-C14.tif	6	1	0	0
6_5fc65d1e54a3f-C14.tif	6	2	0	0
6_5fc65d1e54a3f-C14.tif	6	3	0	0
6_5fc65d1e54a3f-C14.tif	6	4	0	0
6_5fc65d1e54a3f-C14.tif	6	5	0	0
6_5fc65d1e54a3f-C14.tif	6	6	0	0
6_5fc65d1e54a3f-C14.tif	6	7	0	0
6_5fc65d1e54a3f-C14.tif	6	8	0	0
6_5fc65d1e54a3f-C14.tif	6	9	52	318
6_5fc65d1e54a3f-C14.tif	6	10	0	0
6_5fc65d1e54a3f-C14.tif	6	11	0	0
7_5fc65d1e5b658-C14.tif	7	1	0	0
7_5fc65d1e5b658-C14.tif	7	2	0	0
7_5fc65d1e5b658-C14.tif	7	3	0	1988
7_5fc65d1e5b658-C14.tif	7	4	0	1988
7_5fc65d1e5b658-C14.tif	7	5	0	0
7_5fc65d1e5b658-C14.tif	7	6	0	0
7_5fc65d1e5b658-C14.tif	7	7	0	0
8_5fc65d1e5af9d-C14.tif	8	1	0	0
8_5fc65d1e5af9d-C14.tif	8	2	0	0
8_5fc65d1e5af9d-C14.tif	8	3	0	0
8_5fc65d1e5af9d-C14.tif	8	4	495	0
8_5fc65d1e5af9d-C14.tif	8	5	0	0
8_5fc65d1e5af9d-C14.tif	8	6	495	0
9_5fc65d1e5a242-C14.tif	9	1	0	0
9_5fc65d1e5a242-C14.tif	9	2	0	0
9_5fc65d1e5a242-C14.tif	9	3	0	0
9_5fc65d1e5a242-C14.tif	9	4	0	0
9_5fc65d1e5a242-C14.tif	9	5	0	0
9_5fc65d1e5a242-C14.tif	9	6	0	0
9_5fc65d1e5a242-C14.tif	9	7	0	0
9_5fc65d1e5a242-C14.tif	9	8	0	0
9_5fc65d1e5a242-C14.tif	9	9	0	0

## Sheet: Fig.3_FS3-B_1dR_rDNAx53BP1xPML
							Final_colocalization of individual rDNA object with (x-53BP1_y-PML)
			SIZE coloc	SIZE coloc
analyzed nucleoli_original name	ID of individual nucleoli	rDNA object ID	rDNA/53BP1	rDNA/PML
10_5fc65d1e5a8bc-C13.tif	10	1	0	0
10_5fc65d1e5a8bc-C13.tif	10	2	0	0
10_5fc65d1e5a8bc-C13.tif	10	3	0	0
10_5fc65d1e5a8bc-C13.tif	10	4	0	0
10_5fc65d1e5a8bc-C13.tif	10	5	0	0
10_5fc65d1e5a8bc-C13.tif	10	6	0	1112
10_5fc65d1e5a8bc-C13.tif	10	7	0	0
10_5fc65d1e5a8bc-C13.tif	10	8	0	0
10_5fc65d1e5a8bc-C13.tif	10	9	0	0
10_5fc65d1e5a8bc-C13.tif	10	10	0	0
10_5fc65d1e5a8bc-C13.tif	10	11	0	0
10_5fc65d1e5a8bc-C13.tif	10	12	0	0
10_5fc65d1e5a8bc-C13.tif	10	13	0	0
10_5fc65d1e5a8bc-C13.tif	10	14	0	0
10_5fc65d1e5a8bc-C13.tif	10	15	0	0
10_5fc65d1e5a8bc-C13.tif	10	16	0	0
10_5fc65d1e5a8bc-C13.tif	10	17	0	0
10_5fc65d1e5a8bc-C13.tif	10	18	0	0
10_5fc65d1e5a8bc-C13.tif	10	19	0	0
10_5fc65d1e5a8bc-C13.tif	10	20	0	0
10_5fc65d1e5a8bc-C13.tif	10	21	0	0
11_5fc65d1e62785-C13.tif	11	1	0	0
11_5fc65d1e62785-C13.tif	11	2	0	0
11_5fc65d1e62785-C13.tif	11	3	0	0
11_5fc65d1e62785-C13.tif	11	4	0	0
11_5fc65d1e62785-C13.tif	11	5	0	0
11_5fc65d1e62785-C13.tif	11	6	0	0
11_5fc65d1e62785-C13.tif	11	7	0	0
11_5fc65d1e62785-C13.tif	11	8	0	0
11_5fc65d1e62785-C13.tif	11	9	0	0
11_5fc65d1e62785-C13.tif	11	10	407	0
11_5fc65d1e62785-C13.tif	11	11	0	0
11_5fc65d1e62785-C13.tif	11	12	0	0
11_5fc65d1e62785-C13.tif	11	13	0	0
11_5fc65d1e62785-C13.tif	11	14	0	0
11_5fc65d1e62785-C13.tif	11	15	32	0
11_5fc65d1e62785-C13.tif	11	16	0	0
11_5fc65d1e62785-C13.tif	11	17	0	0
11_5fc65d1e62785-C13.tif	11	18	0	0
11_5fc65d1e62785-C13.tif	11	19	0	0
11_5fc65d1e62785-C13.tif	11	20	0	0
11_5fc65d1e62785-C13.tif	11	21	0	0
11_5fc65d1e62785-C13.tif	11	22	0	0
11_5fc65d1e62785-C13.tif	11	23	0	0
12_5fc65d1e61357-C13.tif	12	1	230	1599
12_5fc65d1e61357-C13.tif	12	2	0	0
12_5fc65d1e61357-C13.tif	12	3	0	0
12_5fc65d1e61357-C13.tif	12	4	0	0
12_5fc65d1e61357-C13.tif	12	5	0	0
12_5fc65d1e61357-C13.tif	12	6	0	0
13_5fc65d1e60604-C13.tif	12	1
			0	0
13_5fc65d1e60604-C13.tif	13	2	0	0
13_5fc65d1e60604-C13.tif	13	3	0	0
13_5fc65d1e60604-C13.tif	13	4	0	0
13_5fc65d1e60604-C13.tif	13	5	0	0
13_5fc65d1e60604-C13.tif	13	6	0	0
13_5fc65d1e60604-C13.tif	13	7	0	0
13_5fc65d1e60604-C13.tif	13	8	0	0
13_5fc65d1e60604-C13.tif	13	9	0	0
13_5fc65d1e60604-C13.tif	13	10	0	23
13_5fc65d1e60604-C13.tif	13	11	0	0
13_5fc65d1e60604-C13.tif	13	12	0	0
13_5fc65d1e60604-C13.tif	13	13	0	0
13_5fc65d1e60604-C13.tif	13	14	0	0
13_5fc65d1e60604-C13.tif	13	15	0	0
13_5fc65d1e60604-C13.tif	13	16	0	0
13_5fc65d1e60604-C13.tif	13	17	0	0
13_5fc65d1e60604-C13.tif	13	18	0	0
13_5fc65d1e60604-C13.tif	13	19	0	0
13_5fc65d1e60604-C13.tif	13	20	0	0
13_5fc65d1e60604-C13.tif	13	21	0	0
13_5fc65d1e60604-C13.tif	13	22	0	0
13_5fc65d1e60604-C13.tif	13	23	0	0
13_5fc65d1e60604-C13.tif	13	24	0	0
13_5fc65d1e60604-C13.tif	13	25	0	0
14B_5fc65d1e6840f-C13.tif	14B	1	0	0
14B_5fc65d1e6840f-C13.tif	14B	2	0	0
14B_5fc65d1e6840f-C13.tif	14B	3	0	0
14B_5fc65d1e6840f-C13.tif	14B	4	0	0
14B_5fc65d1e6840f-C13.tif	14B	5	0	0
14B_5fc65d1e6840f-C13.tif	14B	6	0	0
14B_5fc65d1e6840f-C13.tif	14B	7	0	20
14B_5fc65d1e6840f-C13.tif	14B	8	0	0
14B_5fc65d1e6840f-C13.tif	14B	9	0	0
14B_5fc65d1e6840f-C13.tif	14B	10	0	0
14B_5fc65d1e6840f-C13.tif	14B	11	0	0
14_5fc65d1e6840f-C13.tif	14	1	0	0
14_5fc65d1e6840f-C13.tif	14	2	0	0
14_5fc65d1e6840f-C13.tif	14	3	0	0
14_5fc65d1e6840f-C13.tif	14	4	0	0
14_5fc65d1e6840f-C13.tif	14	5	0	0
14_5fc65d1e6840f-C13.tif	14	6	0	0
14_5fc65d1e6840f-C13.tif	14	7	0	0
14_5fc65d1e6840f-C13.tif	14	8	0	0
14_5fc65d1e6840f-C13.tif	14	9	0	0
14_5fc65d1e6840f-C13.tif	14	10	0	0
14_5fc65d1e6840f-C13.tif	14	11	0	0
14_5fc65d1e6840f-C13.tif	14	12	0	0
14_5fc65d1e6840f-C13.tif	14	13	0	0
14_5fc65d1e6840f-C13.tif	14	14	0	0
14_5fc65d1e6840f-C13.tif	14	15	0	0
14_5fc65d1e6840f-C13.tif	14	16	0	0
15_5fc65d1e675a3-C13.tif	15	1	0	0
15_5fc65d1e675a3-C13.tif	15	2	0	0
15_5fc65d1e675a3-C13.tif	15	3	0	0
15_5fc65d1e675a3-C13.tif	15	4	0	0
15_5fc65d1e675a3-C13.tif	15	5	0	0
15_5fc65d1e675a3-C13.tif	15	6	0	0
15_5fc65d1e675a3-C13.tif	15	7	0	0
15_5fc65d1e675a3-C13.tif	15	8	97	0
15_5fc65d1e675a3-C13.tif	15	9	0	0
15_5fc65d1e675a3-C13.tif	15	10	0	0
15_5fc65d1e675a3-C13.tif	15	11	0	34
15_5fc65d1e675a3-C13.tif	15	12	248	0
15_5fc65d1e675a3-C13.tif	15	13	0	0
15_5fc65d1e675a3-C13.tif	15	14	0	0
15_5fc65d1e675a3-C13.tif	15	15	0	0
15_5fc65d1e675a3-C13.tif	15	16	0	0
15_5fc65d1e675a3-C13.tif	15	17	0	0
15_5fc65d1e675a3-C13.tif	15	18	0	0
15_5fc65d1e675a3-C13.tif	15	19	0	0
15_5fc65d1e675a3-C13.tif	15	20	0	0
15_5fc65d1e675a3-C13.tif	15	21	0	0
15_5fc65d1e675a3-C13.tif	15	22	0	0
15_5fc65d1e675a3-C13.tif	15	23	0	0
15_5fc65d1e675a3-C13.tif	15	24	171	38
15_5fc65d1e675a3-C13.tif	15	25	0	0
15_5fc65d1e675a3-C13.tif	15	26	0	0
15_5fc65d1e675a3-C13.tif	15	27	0	0
15_5fc65d1e675a3-C13.tif	15	28	0	0
15_5fc65d1e675a3-C13.tif	15	29	0	0
15_5fc65d1e675a3-C13.tif	15	30	0	0
15_5fc65d1e675a3-C13.tif	15	31	0	0
15_5fc65d1e675a3-C13.tif	15	32	0	0
15_5fc65d1e675a3-C13.tif	15	33	0	0
15_5fc65d1e675a3-C13.tif	15	34	28	588
15_5fc65d1e675a3-C13.tif	15	35	0	0
15_5fc65d1e675a3-C13.tif	15	36	0	0
15_5fc65d1e675a3-C13.tif	15	37	26	0
15_5fc65d1e675a3-C13.tif	15	38	0	0
15_5fc65d1e675a3-C13.tif	15	39	0	0
15_5fc65d1e675a3-C13.tif	15	40	0	0
15_5fc65d1e675a3-C13.tif	15	41	0	0
15_5fc65d1e675a3-C13.tif	15	42	0	34
15_5fc65d1e675a3-C13.tif	15	43	0	0
15_5fc65d1e675a3-C13.tif	15	44	0	21
15_5fc65d1e675a3-C13.tif	15	45	0	0
15_5fc65d1e675a3-C13.tif	15	46	0	0
15_5fc65d1e675a3-C13.tif	15	47	0	0
15_5fc65d1e675a3-C13.tif	15	48	0	0
15_5fc65d1e675a3-C13.tif	15	49	123	0
15_5fc65d1e675a3-C13.tif	15	50	0	0
15_5fc65d1e675a3-C13.tif	15	51	0	0
15_5fc65d1e675a3-C13.tif	15	52	0	0
15_5fc65d1e675a3-C13.tif	15	53	0	0
15_5fc65d1e675a3-C13.tif	15	54	0	0
15_5fc65d1e675a3-C13.tif	15	55	0	0
15_5fc65d1e675a3-C13.tif	15	56	0	0
15_5fc65d1e675a3-C13.tif	15	57	0	0
15_5fc65d1e675a3-C13.tif	15	58	0	0
15_5fc65d1e675a3-C13.tif	15	59	0	0
15_5fc65d1e675a3-C13.tif	15	60	0	0
15_5fc65d1e675a3-C13.tif	15	61	0	0
15_5fc65d1e675a3-C13.tif	15	62	0	0
16A_5fc65d1e662ff-C13.tif	16A	1	0	0
16A_5fc65d1e662ff-C13.tif	16A	2	0	0
16A_5fc65d1e662ff-C13.tif	16A	3	0	0
16A_5fc65d1e662ff-C13.tif	16A	4	0	0
16A_5fc65d1e662ff-C13.tif	16A	5	0	997
16A_5fc65d1e662ff-C13.tif	16A	6	0	0
16A_5fc65d1e662ff-C13.tif	16A	7	0	0
16A_5fc65d1e662ff-C13.tif	16A	8	0	0
16A_5fc65d1e662ff-C13.tif	16A	9	0	0
16A_5fc65d1e662ff-C13.tif	16A	10	0	0
16A_5fc65d1e662ff-C13.tif	16A	11	0	0
16A_5fc65d1e662ff-C13.tif	16A	12	0	0
16A_5fc65d1e662ff-C13.tif	16A	13	0	0
16A_5fc65d1e662ff-C13.tif	16A	14	0	0
16A_5fc65d1e662ff-C13.tif	16A	15	0	0
16A_5fc65d1e662ff-C13.tif	16A	16	0	0
16B_5fc65d1e662ff-C13.tif	16B	1	0	0
16B_5fc65d1e662ff-C13.tif	16B	2	0	0
16B_5fc65d1e662ff-C13.tif	16B	3	0	0
16B_5fc65d1e662ff-C13.tif	16B	4	0	0
16B_5fc65d1e662ff-C13.tif	16B	5	0	0
16B_5fc65d1e662ff-C13.tif	16B	6	0	0
16B_5fc65d1e662ff-C13.tif	16B	7	0	855
16B_5fc65d1e662ff-C13.tif	16B	8	0	0
16B_5fc65d1e662ff-C13.tif	16B	9	0	0
17_5fc65d1e655e4-C13.tif	17	1	0	0
17_5fc65d1e655e4-C13.tif	17	2	0	0
17_5fc65d1e655e4-C13.tif	17	3	0	166
17_5fc65d1e655e4-C13.tif	17	4	0	0
17_5fc65d1e655e4-C13.tif	17	5	0	0
17_5fc65d1e655e4-C13.tif	17	6	0	0
17_5fc65d1e655e4-C13.tif	17	7	0	0
17_5fc65d1e655e4-C13.tif	17	8	0	0
17_5fc65d1e655e4-C13.tif	17	9	0	0
17_5fc65d1e655e4-C13.tif	17	10	0	0
17_5fc65d1e655e4-C13.tif	17	11	0	0
17_5fc65d1e655e4-C13.tif	17	12	0	0
17_5fc65d1e655e4-C13.tif	17	13	0	0
17_5fc65d1e655e4-C13.tif	17	14	0	330
17_5fc65d1e655e4-C13.tif	17	15	0	0
18_5fc65d1e634ae-C13.tif	18	1	0	0
18_5fc65d1e634ae-C13.tif	18	2	0	0
18_5fc65d1e634ae-C13.tif	18	3	0	0
18_5fc65d1e634ae-C13.tif	18	4	0	0
18_5fc65d1e634ae-C13.tif	18	5	0	0
18_5fc65d1e634ae-C13.tif	18	6	0	0
18_5fc65d1e634ae-C13.tif	18	7	0	0
18_5fc65d1e634ae-C13.tif	18	8	0	0
18_5fc65d1e634ae-C13.tif	18	9	0	0
18_5fc65d1e634ae-C13.tif	18	10	0	0
18_5fc65d1e634ae-C13.tif	18	11	0	0
18_5fc65d1e634ae-C13.tif	18	12	0	0
18_5fc65d1e634ae-C13.tif	18	13	0	0
18_5fc65d1e634ae-C13.tif	18	14	0	0
18_5fc65d1e634ae-C13.tif	18	15	0	0
18_5fc65d1e634ae-C13.tif	18	16	0	0
18_5fc65d1e634ae-C13.tif	18	17	0	0
18_5fc65d1e634ae-C13.tif	18	18	0	0
18_5fc65d1e634ae-C13.tif	18	19	0	0
18_5fc65d1e634ae-C13.tif	18	20	0	0
18_5fc65d1e634ae-C13.tif	18	21	0	0
18_5fc65d1e634ae-C13.tif	18	22	0	0
18_5fc65d1e634ae-C13.tif	18	23	0	0
18_5fc65d1e634ae-C13.tif	18	24	0	0
18_5fc65d1e634ae-C13.tif	18	25	0	0
18_5fc65d1e634ae-C13.tif	18	26	0	0
18_5fc65d1e634ae-C13.tif	18	27	0	0
19_5fc65d1e620d6-C13.tif	19	1	0	0
19_5fc65d1e620d6-C13.tif	19	2	0	0
19_5fc65d1e620d6-C13.tif	19	3	0	0
19_5fc65d1e620d6-C13.tif	19	4	0	128
19_5fc65d1e620d6-C13.tif	19	5	0	0
19_5fc65d1e620d6-C13.tif	19	6	0	0
19_5fc65d1e620d6-C13.tif	19	7	0	0
19_5fc65d1e620d6-C13.tif	19	8	0	0
19_5fc65d1e620d6-C13.tif	19	9	0	0
19_5fc65d1e620d6-C13.tif	19	10	0	0
19_5fc65d1e620d6-C13.tif	19	11	0	0
19_5fc65d1e620d6-C13.tif	19	12	0	0
19_5fc65d1e620d6-C13.tif	19	13	0	0
19_5fc65d1e620d6-C13.tif	19	14	0	0
19_5fc65d1e620d6-C13.tif	19	15	0	0
19_5fc65d1e620d6-C13.tif	19	16	0	0
19_5fc65d1e620d6-C13.tif	19	17	0	0
19_5fc65d1e620d6-C13.tif	19	18	0	0
19_5fc65d1e620d6-C13.tif	19	19	0	0
19_5fc65d1e620d6-C13.tif	19	20	0	0
19_5fc65d1e620d6-C13.tif	19	21	0	0
19_5fc65d1e620d6-C13.tif	19	22	0	0
19_5fc65d1e620d6-C13.tif	19	23	0	86
19_5fc65d1e620d6-C13.tif	19	24	0	0
19_5fc65d1e620d6-C13.tif	19	25	0	0
19_5fc65d1e620d6-C13.tif	19	26	0	0
19_5fc65d1e620d6-C13.tif	19	27	0	891
19_5fc65d1e620d6-C13.tif	19	28	0	0
19_5fc65d1e620d6-C13.tif	19	29	0	0
19_5fc65d1e620d6-C13.tif	19	30	0	0
19_5fc65d1e620d6-C13.tif	19	31	0	0
19_5fc65d1e620d6-C13.tif	19	32	0	0
1_5fc65d1e551fc-C13.tif	1	1	0	0
1_5fc65d1e551fc-C13.tif	1	2	0	0
1_5fc65d1e551fc-C13.tif	1	3	0	0
1_5fc65d1e551fc-C13.tif	1	4	0	0
1_5fc65d1e551fc-C13.tif	1	5	0	0
1_5fc65d1e551fc-C13.tif	1	6	0	0
1_5fc65d1e551fc-C13.tif	1	7	0	0
1_5fc65d1e551fc-C13.tif	1	8	0	0
1_5fc65d1e551fc-C13.tif	1	9	37	0
1_5fc65d1e551fc-C13.tif	1	10	0	0
1_5fc65d1e551fc-C13.tif	1	11	0	0
1_5fc65d1e551fc-C13.tif	1	12	0	0
1_5fc65d1e551fc-C13.tif	1	13	0	0
1_5fc65d1e551fc-C13.tif	1	14	0	0
1_5fc65d1e551fc-C13.tif	1	15	0	0
1_5fc65d1e551fc-C13.tif	1	16	0	0
1_5fc65d1e551fc-C13.tif	1	17	212	25
1_5fc65d1e551fc-C13.tif	1	18	0	0
1_5fc65d1e551fc-C13.tif	1	19	0	25
1_5fc65d1e551fc-C13.tif	1	20	0	0
1_5fc65d1e551fc-C13.tif	1	21	0	0
1_5fc65d1e551fc-C13.tif	1	22	445	0
1_5fc65d1e551fc-C13.tif	1	23	0	0
1_5fc65d1e551fc-C13.tif	1	24	0	0
1_5fc65d1e551fc-C13.tif	1	25	0	0
1_5fc65d1e551fc-C13.tif	1	26	0	0
1_5fc65d1e551fc-C13.tif	1	27	0	0
1_5fc65d1e551fc-C13.tif	1	28	0	0
1_5fc65d1e551fc-C13.tif	1	29	0	0
20_5fc65d1e65c70-C13.tif	20	1	0	0
20_5fc65d1e65c70-C13.tif	20	2	0	0
20_5fc65d1e65c70-C13.tif	20	3	0	0
20_5fc65d1e65c70-C13.tif	20	4	0	0
20_5fc65d1e65c70-C13.tif	20	5	0	0
20_5fc65d1e65c70-C13.tif	20	6	0	0
20_5fc65d1e65c70-C13.tif	20	7	0	0
20_5fc65d1e65c70-C13.tif	20	8	0	0
20_5fc65d1e65c70-C13.tif	20	9	0	0
20_5fc65d1e65c70-C13.tif	20	10	0	0
20_5fc65d1e65c70-C13.tif	20	11	0	0
20_5fc65d1e65c70-C13.tif	20	12	0	0
20_5fc65d1e65c70-C13.tif	20	13	0	0
20_5fc65d1e65c70-C13.tif	20	14	0	0
21_5fc65d1e64f72-C13.tif	21	1	0	0
21_5fc65d1e64f72-C13.tif	21	2	0	0
21_5fc65d1e64f72-C13.tif	21	3	0	0
21_5fc65d1e64f72-C13.tif	21	4	0	0
21_5fc65d1e64f72-C13.tif	21	5	0	0
21_5fc65d1e64f72-C13.tif	21	6	0	0
21_5fc65d1e64f72-C13.tif	21	7	0	0
21_5fc65d1e64f72-C13.tif	21	8	0	0
21_5fc65d1e64f72-C13.tif	21	9	0	0
21_5fc65d1e64f72-C13.tif	21	10	0	0
21_5fc65d1e64f72-C13.tif	21	11	0	0
21_5fc65d1e64f72-C13.tif	21	12	0	65
21_5fc65d1e64f72-C13.tif	21	13	0	0
21_5fc65d1e64f72-C13.tif	21	14	0	0
21_5fc65d1e64f72-C13.tif	21	15	0	0
21_5fc65d1e64f72-C13.tif	21	16	0	0
21_5fc65d1e64f72-C13.tif	21	17	0	0
21_5fc65d1e64f72-C13.tif	21	18	0	0
21_5fc65d1e64f72-C13.tif	21	19	0	0
21_5fc65d1e64f72-C13.tif	21	20	0	0
21_5fc65d1e64f72-C13.tif	21	21	334	276
21_5fc65d1e64f72-C13.tif	21	22	0	0
21_5fc65d1e64f72-C13.tif	21	23	0	0
21_5fc65d1e64f72-C13.tif	21	24	0	0
21_5fc65d1e64f72-C13.tif	21	25	0	0
21_5fc65d1e64f72-C13.tif	21	26	0	0
21_5fc65d1e64f72-C13.tif	21	27	0	0
21_5fc65d1e64f72-C13.tif	21	28	0	0
21_5fc65d1e64f72-C13.tif	21	29	0	0
21_5fc65d1e64f72-C13.tif	21	30	0	0
22_5fc65d1e62e24-C13.tif	22	1	0	0
22_5fc65d1e62e24-C13.tif	22	2	0	0
22_5fc65d1e62e24-C13.tif	22	3	0	0
22_5fc65d1e62e24-C13.tif	22	4	0	0
22_5fc65d1e62e24-C13.tif	22	5	0	0
22_5fc65d1e62e24-C13.tif	22	6	0	0
22_5fc65d1e62e24-C13.tif	22	7	321	720
22_5fc65d1e62e24-C13.tif	22	8	0	0
22_5fc65d1e62e24-C13.tif	22	9	0	0
22_5fc65d1e62e24-C13.tif	22	10	0	0
22_5fc65d1e62e24-C13.tif	22	11	0	0
22_5fc65d1e62e24-C13.tif	22	12	0	0
22_5fc65d1e62e24-C13.tif	22	13	0	0
22_5fc65d1e62e24-C13.tif	22	14	0	0
22_5fc65d1e62e24-C13.tif	22	15	0	0
22_5fc65d1e62e24-C13.tif	22	16	0	0
22_5fc65d1e62e24-C13.tif	22	17	0	0
22_5fc65d1e62e24-C13.tif	22	18	0	0
22_5fc65d1e62e24-C13.tif	22	19	0	0
22_5fc65d1e62e24-C13.tif	22	20	0	720
22_5fc65d1e62e24-C13.tif	22	21	0	0
22_5fc65d1e62e24-C13.tif	22	22	0	0
22_5fc65d1e62e24-C13.tif	22	23	0	0
23_5fc65d1e61a0f-C13.tif	23	1	0	0
23_5fc65d1e61a0f-C13.tif	23	2	45	0
23_5fc65d1e61a0f-C13.tif	23	3	0	0
23_5fc65d1e61a0f-C13.tif	23	4	0	0
23_5fc65d1e61a0f-C13.tif	23	5	74	0
23_5fc65d1e61a0f-C13.tif	23	6	0	0
23_5fc65d1e61a0f-C13.tif	23	7	0	0
23_5fc65d1e61a0f-C13.tif	23	8	0	0
23_5fc65d1e61a0f-C13.tif	23	9	0	0
23_5fc65d1e61a0f-C13.tif	23	10	0	0
23_5fc65d1e61a0f-C13.tif	23	11	0	0
23_5fc65d1e61a0f-C13.tif	23	12	0	0
23_5fc65d1e61a0f-C13.tif	23	13	0	0
23_5fc65d1e61a0f-C13.tif	23	14	0	0
23_5fc65d1e61a0f-C13.tif	23	15	0	0
23_5fc65d1e61a0f-C13.tif	23	16	0	0
23_5fc65d1e61a0f-C13.tif	23	17	0	0
23_5fc65d1e61a0f-C13.tif	23	18	0	0
24_5fc65d1e5ff38-C13.tif	24	1	0	0
24_5fc65d1e5ff38-C13.tif	24	2	0	0
24_5fc65d1e5ff38-C13.tif	24	3	0	0
24_5fc65d1e5ff38-C13.tif	24	4	0	0
24_5fc65d1e5ff38-C13.tif	24	5	0	0
24_5fc65d1e5ff38-C13.tif	24	6	0	0
24_5fc65d1e5ff38-C13.tif	24	7	0	0
24_5fc65d1e5ff38-C13.tif	24	8	0	0
24_5fc65d1e5ff38-C13.tif	24	9	0	0
24_5fc65d1e5ff38-C13.tif	24	10	0	0
24_5fc65d1e5ff38-C13.tif	24	11	0	0
24_5fc65d1e5ff38-C13.tif	24	12	0	0
24_5fc65d1e5ff38-C13.tif	24	13	0	0
24_5fc65d1e5ff38-C13.tif	24	14	0	0
24_5fc65d1e5ff38-C13.tif	24	15	0	0
24_5fc65d1e5ff38-C13.tif	24	16	0	0
24_5fc65d1e5ff38-C13.tif	24	17	0	0
24_5fc65d1e5ff38-C13.tif	24	18	0	0
24_5fc65d1e5ff38-C13.tif	24	19	0	0
24_5fc65d1e5ff38-C13.tif	24	20	0	0
24_5fc65d1e5ff38-C13.tif	24	21	0	0
25_5fc65d1e5f8a4-C13.tif	25	1	25	0
25_5fc65d1e5f8a4-C13.tif	25	2	0	0
25_5fc65d1e5f8a4-C13.tif	25	3	0	0
25_5fc65d1e5f8a4-C13.tif	25	4	0	0
25_5fc65d1e5f8a4-C13.tif	25	5	0	0
25_5fc65d1e5f8a4-C13.tif	25	6	86	0
25_5fc65d1e5f8a4-C13.tif	25	7	0	0
25_5fc65d1e5f8a4-C13.tif	25	8	0	0
25_5fc65d1e5f8a4-C13.tif	25	9	0	0
25_5fc65d1e5f8a4-C13.tif	25	10	0	0
25_5fc65d1e5f8a4-C13.tif	25	11	0	0
25_5fc65d1e5f8a4-C13.tif	25	12	0	0
25_5fc65d1e5f8a4-C13.tif	25	13	0	0
25_5fc65d1e5f8a4-C13.tif	25	14	0	0
25_5fc65d1e5f8a4-C13.tif	25	15	0	0
25_5fc65d1e5f8a4-C13.tif	25	16	0	0
25_5fc65d1e5f8a4-C13.tif	25	17	0	0
25_5fc65d1e5f8a4-C13.tif	25	18	0	0
25_5fc65d1e5f8a4-C13.tif	25	19	0	0
25_5fc65d1e5f8a4-C13.tif	25	20	0	0
25_5fc65d1e5f8a4-C13.tif	25	21	0	0
25_5fc65d1e5f8a4-C13.tif	25	22	0	0
26_5fc65d1e5f1ca-C13.tif	26	1	0	0
26_5fc65d1e5f1ca-C13.tif	26	2	0	633
26_5fc65d1e5f1ca-C13.tif	26	3	0	0
26_5fc65d1e5f1ca-C13.tif	26	4	0	0
26_5fc65d1e5f1ca-C13.tif	26	5	0	0
26_5fc65d1e5f1ca-C13.tif	26	6	0	0
26_5fc65d1e5f1ca-C13.tif	26	7	0	158
26_5fc65d1e5f1ca-C13.tif	26	8	0	633
26_5fc65d1e5f1ca-C13.tif	26	9	0	0
26_5fc65d1e5f1ca-C13.tif	26	10	0	103
26_5fc65d1e5f1ca-C13.tif	26	11	0	0
26_5fc65d1e5f1ca-C13.tif	26	12	0	0
26_5fc65d1e5f1ca-C13.tif	26	13	0	0
26_5fc65d1e5f1ca-C13.tif	26	14	0	0
26_5fc65d1e5f1ca-C13.tif	26	15	0	0
26_5fc65d1e5f1ca-C13.tif	26	16	0	0
26_5fc65d1e5f1ca-C13.tif	26	17	0	0
26_5fc65d1e5f1ca-C13.tif	26	18	0	0
26_5fc65d1e5f1ca-C13.tif	26	19	0	0
26_5fc65d1e5f1ca-C13.tif	26	20	0	0
27_5fc65d1e5eb4f-C13.tif	27	1	168.375	81.2353
27_5fc65d1e5eb4f-C13.tif	27	2	0	0
27_5fc65d1e5eb4f-C13.tif	27	3	0	0
27_5fc65d1e5eb4f-C13.tif	27	4	0	0
27_5fc65d1e5eb4f-C13.tif	27	5	0	0
27_5fc65d1e5eb4f-C13.tif	27	6	0	0
27_5fc65d1e5eb4f-C13.tif	27	7	0	0
27_5fc65d1e5eb4f-C13.tif	27	8	0	0
27_5fc65d1e5eb4f-C13.tif	27	9	0	89
27_5fc65d1e5eb4f-C13.tif	27	10	0	0
27_5fc65d1e5eb4f-C13.tif	27	11	23	0
27_5fc65d1e5eb4f-C13.tif	27	12	0	0
27_5fc65d1e5eb4f-C13.tif	27	13	0	0
27_5fc65d1e5eb4f-C13.tif	27	14	0	0
29_5fc65d1e5e4a5-C13.tif	29	1	0	0
29_5fc65d1e5e4a5-C13.tif	29	2	0	0
29_5fc65d1e5e4a5-C13.tif	29	3	0	0
29_5fc65d1e5e4a5-C13.tif	29	4	0	0
29_5fc65d1e5e4a5-C13.tif	29	5	0	0
29_5fc65d1e5e4a5-C13.tif	29	6	0	0
29_5fc65d1e5e4a5-C13.tif	29	7	0	0
29_5fc65d1e5e4a5-C13.tif	29	8	0	0
29_5fc65d1e5e4a5-C13.tif	29	9	0	0
29_5fc65d1e5e4a5-C13.tif	29	10	0	0
2_5fc65d1e59b8d-C13.tif	2	1	0	0
2_5fc65d1e59b8d-C13.tif	2	2	0	0
2_5fc65d1e59b8d-C13.tif	2	3	0	0
2_5fc65d1e59b8d-C13.tif	2	4	0	0
2_5fc65d1e59b8d-C13.tif	2	5	0	0
2_5fc65d1e59b8d-C13.tif	2	6	0	0
2_5fc65d1e59b8d-C13.tif	2	7	0	0
2_5fc65d1e59b8d-C13.tif	2	8	0	0
2_5fc65d1e59b8d-C13.tif	2	9	0	0
2_5fc65d1e59b8d-C13.tif	2	10	0	0
2_5fc65d1e59b8d-C13.tif	2	11	0	0
2_5fc65d1e59b8d-C13.tif	2	12	0	0
2_5fc65d1e59b8d-C13.tif	2	13	0	0
2_5fc65d1e59b8d-C13.tif	2	14	0	0
2_5fc65d1e59b8d-C13.tif	2	15	0	0
2_5fc65d1e59b8d-C13.tif	2	16	0	0
2_5fc65d1e59b8d-C13.tif	2	17	0	0
2_5fc65d1e59b8d-C13.tif	2	18	0	0
2_5fc65d1e59b8d-C13.tif	2	19	0	0
2_5fc65d1e59b8d-C13.tif	2	20	0	0
2_5fc65d1e59b8d-C13.tif	2	21	0	0
2_5fc65d1e59b8d-C13.tif	2	22	0	0
2_5fc65d1e59b8d-C13.tif	2	23	0	0
2_5fc65d1e59b8d-C13.tif	2	24	0	0
2_5fc65d1e59b8d-C13.tif	2	25	0	0
2_5fc65d1e59b8d-C13.tif	2	26	0	0
2_5fc65d1e59b8d-C13.tif	2	27	0	0
2_5fc65d1e59b8d-C13.tif	2	28	0	0
2_5fc65d1e59b8d-C13.tif	2	29	0	0
2_5fc65d1e59b8d-C13.tif	2	30	0	0
2_5fc65d1e59b8d-C13.tif	2	31	0	0
30_5fc65d1e5d74a-C13.tif	30	1	0	0
30_5fc65d1e5d74a-C13.tif	30	2	0	0
30_5fc65d1e5d74a-C13.tif	30	3	0	248
30_5fc65d1e5d74a-C13.tif	30	4	0	0
30_5fc65d1e5d74a-C13.tif	30	5	0	0
30_5fc65d1e5d74a-C13.tif	30	6	0	0
30_5fc65d1e5d74a-C13.tif	30	7	0	0
30_5fc65d1e5d74a-C13.tif	30	8	0	0
30_5fc65d1e5d74a-C13.tif	30	9	0	0
30_5fc65d1e5d74a-C13.tif	30	10	0	0
30_5fc65d1e5d74a-C13.tif	30	11	0	0
30_5fc65d1e5d74a-C13.tif	30	12	0	0
30_5fc65d1e5d74a-C13.tif	30	13	0	0
30_5fc65d1e5d74a-C13.tif	30	14	0	0
30_5fc65d1e5d74a-C13.tif	30	15	0	0
30_5fc65d1e5d74a-C13.tif	30	16	0	0
30_5fc65d1e5d74a-C13.tif	30	17	0	0
30_5fc65d1e5d74a-C13.tif	30	18	0	0
30_5fc65d1e5d74a-C13.tif	30	19	368	1115
30_5fc65d1e5d74a-C13.tif	30	20	0	0
30_5fc65d1e5d74a-C13.tif	30	21	0	0
31_5fc65d1e5d0ba-C13.tif	31	1	0	0
31_5fc65d1e5d0ba-C13.tif	31	2	0	0
31_5fc65d1e5d0ba-C13.tif	31	3	0	0
31_5fc65d1e5d0ba-C13.tif	31	4	0	0
31_5fc65d1e5d0ba-C13.tif	31	5	0	0
31_5fc65d1e5d0ba-C13.tif	31	6	0	0
31_5fc65d1e5d0ba-C13.tif	31	7	0	0
31_5fc65d1e5d0ba-C13.tif	31	8	0	0
31_5fc65d1e5d0ba-C13.tif	31	9	0	0
31_5fc65d1e5d0ba-C13.tif	31	10	0	0
31_5fc65d1e5d0ba-C13.tif	31	11	0	0
31_5fc65d1e5d0ba-C13.tif	31	12	0	0
31_5fc65d1e5d0ba-C13.tif	31	13	0	0
31_5fc65d1e5d0ba-C13.tif	31	14	0	0
31_5fc65d1e5d0ba-C13.tif	31	15	0	0
31_5fc65d1e5d0ba-C13.tif	31	16	0	0
31_5fc65d1e5d0ba-C13.tif	31	17	0	0
32_5fc65d1e5ca1a-C13.tif	32	1	0	0
32_5fc65d1e5ca1a-C13.tif	32	2	0	0
32_5fc65d1e5ca1a-C13.tif	32	3	0	0
32_5fc65d1e5ca1a-C13.tif	32	4	0	0
32_5fc65d1e5ca1a-C13.tif	32	5	0	0
32_5fc65d1e5ca1a-C13.tif	32	6	0	0
32_5fc65d1e5ca1a-C13.tif	32	7	0	0
32_5fc65d1e5ca1a-C13.tif	32	8	0	0
32_5fc65d1e5ca1a-C13.tif	32	9	0	0
32_5fc65d1e5ca1a-C13.tif	32	10	0	0
32_5fc65d1e5ca1a-C13.tif	32	11	0	0
32_5fc65d1e5ca1a-C13.tif	32	12	0	0
32_5fc65d1e5ca1a-C13.tif	32	13	0	0
32_5fc65d1e5ca1a-C13.tif	32	14	21	0
32_5fc65d1e5ca1a-C13.tif	32	15	0	0
32_5fc65d1e5ca1a-C13.tif	32	16	0	0
32_5fc65d1e5ca1a-C13.tif	32	17	0	0
32_5fc65d1e5ca1a-C13.tif	32	18	0	0
32_5fc65d1e5ca1a-C13.tif	32	19	0	0
32_5fc65d1e5ca1a-C13.tif	32	20	0	0
33_5fc65d1e5bce9-C13.tif	33	1	0	0
33_5fc65d1e5bce9-C13.tif	33	2	0	0
33_5fc65d1e5bce9-C13.tif	33	3	0	0
33_5fc65d1e5bce9-C13.tif	33	4	0	0
33_5fc65d1e5bce9-C13.tif	33	5	0	0
33_5fc65d1e5bce9-C13.tif	33	6	0	0
33_5fc65d1e5bce9-C13.tif	33	7	0	0
33_5fc65d1e5bce9-C13.tif	33	8	0	0
33_5fc65d1e5bce9-C13.tif	33	9	0	0
33_5fc65d1e5bce9-C13.tif	33	10	0	0
33_5fc65d1e5bce9-C13.tif	33	11	0	749
33_5fc65d1e5bce9-C13.tif	33	12	0	0
33_5fc65d1e5bce9-C13.tif	33	13	0	0
33_5fc65d1e5bce9-C13.tif	33	14	0	0
34_5fc65d1e56594-C13.tif	34	1	0	0
34_5fc65d1e56594-C13.tif	34	2	0	33
34_5fc65d1e56594-C13.tif	34	3	0	0
34_5fc65d1e56594-C13.tif	34	4	0	0
34_5fc65d1e56594-C13.tif	34	5	0	0
34_5fc65d1e56594-C13.tif	34	6	0	0
34_5fc65d1e56594-C13.tif	34	7	0	41
34_5fc65d1e56594-C13.tif	34	8	0	0
34_5fc65d1e56594-C13.tif	34	9	0	0
34_5fc65d1e56594-C13.tif	34	10	0	0
34_5fc65d1e56594-C13.tif	34	11	0	0
34_5fc65d1e56594-C13.tif	34	12	0	0
34_5fc65d1e56594-C13.tif	34	13	0	0
35_5fc65d1e55867-C13.tif	35	1	0	0
35_5fc65d1e55867-C13.tif	35	2	0	0
35_5fc65d1e55867-C13.tif	35	3	0	0
35_5fc65d1e55867-C13.tif	35	4	0	0
35_5fc65d1e55867-C13.tif	35	5	0	0
35_5fc65d1e55867-C13.tif	35	6	0	0
35_5fc65d1e55867-C13.tif	35	7	0	0
35_5fc65d1e55867-C13.tif	35	8	0	0
35_5fc65d1e55867-C13.tif	35	9	0	0
35_5fc65d1e55867-C13.tif	35	10	262	0
35_5fc65d1e55867-C13.tif	35	11	0	0
35_5fc65d1e55867-C13.tif	35	12	0	0
35_5fc65d1e55867-C13.tif	35	13	0	0
35_5fc65d1e55867-C13.tif	35	14	0	0
35_5fc65d1e55867-C13.tif	35	15	0	0
35_5fc65d1e55867-C13.tif	35	16	0	0
35_5fc65d1e55867-C13.tif	35	17	0	1220
35_5fc65d1e55867-C13.tif	35	18	0	1220
35_5fc65d1e55867-C13.tif	35	19	0	0
35_5fc65d1e55867-C13.tif	35	20	0	0
35_5fc65d1e55867-C13.tif	35	21	0	0
35_5fc65d1e55867-C13.tif	35	22	0	0
36_5fc65d1e54314-C13.tif	36	1	0	0
36_5fc65d1e54314-C13.tif	36	2	0	0
36_5fc65d1e54314-C13.tif	36	3	0	0
36_5fc65d1e54314-C13.tif	36	4	0	0
36_5fc65d1e54314-C13.tif	36	5	0	0
36_5fc65d1e54314-C13.tif	36	6	0	0
36_5fc65d1e54314-C13.tif	36	7	0	0
36_5fc65d1e54314-C13.tif	36	8	0	0
36_5fc65d1e54314-C13.tif	36	9	0	1561
36_5fc65d1e54314-C13.tif	36	10	0	0
36_5fc65d1e54314-C13.tif	36	11	0	0
36_5fc65d1e54314-C13.tif	36	12	0	0
36_5fc65d1e54314-C13.tif	36	13	0	0
36_5fc65d1e54314-C13.tif	36	14	0	0
36_5fc65d1e54314-C13.tif	36	15	0	0
36_5fc65d1e54314-C13.tif	36	16	0	0
36_5fc65d1e54314-C13.tif	36	17	0	0
36_5fc65d1e54314-C13.tif	36	18	0	0
36_5fc65d1e54314-C13.tif	36	19	0	0
36_5fc65d1e54314-C13.tif	36	20	0	0
36_5fc65d1e54314-C13.tif	36	21	0	0
36_5fc65d1e54314-C13.tif	36	22	0	0
36_5fc65d1e54314-C13.tif	36	23	0	0
36_5fc65d1e54314-C13.tif	36	24	0	0
36_5fc65d1e54314-C13.tif	36	25	0	0
36_5fc65d1e54314-C13.tif	36	26	0	0
36_5fc65d1e54314-C13.tif	36	27	0	50
36_5fc65d1e54314-C13.tif	36	28	0	0
36_5fc65d1e54314-C13.tif	36	29	0	0
36_5fc65d1e54314-C13.tif	36	30	0	0
36_5fc65d1e54314-C13.tif	36	31	0	0
37_5fc65d1e587d7-C13.tif	37	1	0	0
37_5fc65d1e587d7-C13.tif	37	2	0	0
37_5fc65d1e587d7-C13.tif	37	3	0	0
37_5fc65d1e587d7-C13.tif	37	4	0	0
37_5fc65d1e587d7-C13.tif	37	5	0	0
37_5fc65d1e587d7-C13.tif	37	6	0	0
37_5fc65d1e587d7-C13.tif	37	7	0	0
37_5fc65d1e587d7-C13.tif	37	8	0	0
37_5fc65d1e587d7-C13.tif	37	9	0	0
37_5fc65d1e587d7-C13.tif	37	10	0	0
37_5fc65d1e587d7-C13.tif	37	11	0	0
37_5fc65d1e587d7-C13.tif	37	12	0	0
37_5fc65d1e587d7-C13.tif	37	13	0	0
37_5fc65d1e587d7-C13.tif	37	14	0	0
37_5fc65d1e587d7-C13.tif	37	15	0	0
37_5fc65d1e587d7-C13.tif	37	16	0	0
3_5fc65d1e58e54-C13.tif	3	1	0	0
3_5fc65d1e58e54-C13.tif	3	2	0	0
3_5fc65d1e58e54-C13.tif	3	3	0	0
3_5fc65d1e58e54-C13.tif	3	4	0	0
3_5fc65d1e58e54-C13.tif	3	5	0	0
3_5fc65d1e58e54-C13.tif	3	6	0	0
3_5fc65d1e58e54-C13.tif	3	7	0	0
3_5fc65d1e58e54-C13.tif	3	8	0	0
3_5fc65d1e58e54-C13.tif	3	9	0	0
3_5fc65d1e58e54-C13.tif	3	10	0	0
3_5fc65d1e58e54-C13.tif	3	11	0	0
3_5fc65d1e58e54-C13.tif	3	12	0	0
3_5fc65d1e58e54-C13.tif	3	13	0	0
3_5fc65d1e58e54-C13.tif	3	14	38	0
3_5fc65d1e58e54-C13.tif	3	15	0	930
3_5fc65d1e58e54-C13.tif	3	16	0	0
4_5fc65d1e56d38-C13.tif	4	1	0	0
4_5fc65d1e56d38-C13.tif	4	2	0	0
4_5fc65d1e56d38-C13.tif	4	3	0	0
4_5fc65d1e56d38-C13.tif	4	4	34	71
4_5fc65d1e56d38-C13.tif	4	5	0	0
4_5fc65d1e56d38-C13.tif	4	6	0	0
4_5fc65d1e56d38-C13.tif	4	7	0	0
4_5fc65d1e56d38-C13.tif	4	8	0	1179.63
5_5fc65d1e55ef9-C13.tif	5	1	0	0
5_5fc65d1e55ef9-C13.tif	5	2	0	1809
5_5fc65d1e55ef9-C13.tif	5	3	0	0
5_5fc65d1e55ef9-C13.tif	5	4	0	0
5_5fc65d1e55ef9-C13.tif	5	5	0	0
5_5fc65d1e55ef9-C13.tif	5	6	0	1809
5_5fc65d1e55ef9-C13.tif	5	7	0	0
5_5fc65d1e55ef9-C13.tif	5	8	0	0
5_5fc65d1e55ef9-C13.tif	5	9	0	0
5_5fc65d1e55ef9-C13.tif	5	10	0	1809
5_5fc65d1e55ef9-C13.tif	5	11	0	0
5_5fc65d1e55ef9-C13.tif	5	12	0	0
5_5fc65d1e55ef9-C13.tif	5	13	0	0
5_5fc65d1e55ef9-C13.tif	5	14	0	0
5_5fc65d1e55ef9-C13.tif	5	15	0	0
5_5fc65d1e55ef9-C13.tif	5	16	0	0
5_5fc65d1e55ef9-C13.tif	5	17	0	0
5_5fc65d1e55ef9-C13.tif	5	18	0	1809
5_5fc65d1e55ef9-C13.tif	5	19	0	0
5_5fc65d1e55ef9-C13.tif	5	20	0	0
5_5fc65d1e55ef9-C13.tif	5	21	0	0
5_5fc65d1e55ef9-C13.tif	5	22	0	0
5_5fc65d1e55ef9-C13.tif	5	23	0	1809
5_5fc65d1e55ef9-C13.tif	5	24	0	0
5_5fc65d1e55ef9-C13.tif	5	25	0	0
5_5fc65d1e55ef9-C13.tif	5	26	0	0
5_5fc65d1e55ef9-C13.tif	5	27	0	40
5_5fc65d1e55ef9-C13.tif	5	28	0	0
5_5fc65d1e55ef9-C13.tif	5	29	0	0
5_5fc65d1e55ef9-C13.tif	5	30	0	0
5_5fc65d1e55ef9-C13.tif	5	31	0	0
5_5fc65d1e55ef9-C13.tif	0	32	0	0
6_5fc65d1e54a3f-C13.tif	6	1	0	0
6_5fc65d1e54a3f-C13.tif	6	2	0	0
6_5fc65d1e54a3f-C13.tif	6	3	0	0
6_5fc65d1e54a3f-C13.tif	6	4	0	0
6_5fc65d1e54a3f-C13.tif	6	5	0	0
6_5fc65d1e54a3f-C13.tif	6	6	0	0
6_5fc65d1e54a3f-C13.tif	6	7	0	0
6_5fc65d1e54a3f-C13.tif	6	8	0	0
6_5fc65d1e54a3f-C13.tif	6	9	0	0
6_5fc65d1e54a3f-C13.tif	6	10	0	0
6_5fc65d1e54a3f-C13.tif	6	11	0	0
6_5fc65d1e54a3f-C13.tif	6	12	0	0
6_5fc65d1e54a3f-C13.tif	6	13	0	0
6_5fc65d1e54a3f-C13.tif	6	14	0	0
6_5fc65d1e54a3f-C13.tif	6	15	0	0
6_5fc65d1e54a3f-C13.tif	6	16	0	0
6_5fc65d1e54a3f-C13.tif	6	17	24	530
6_5fc65d1e54a3f-C13.tif	6	18	0	0
6_5fc65d1e54a3f-C13.tif	6	19	0	0
6_5fc65d1e54a3f-C13.tif	6	20	0	0
6_5fc65d1e54a3f-C13.tif	6	21	0	318
6_5fc65d1e54a3f-C13.tif	6	22	0	0
6_5fc65d1e54a3f-C13.tif	6	23	0	0
6_5fc65d1e54a3f-C13.tif	6	24	0	530
6_5fc65d1e54a3f-C13.tif	6	25	0	0
6_5fc65d1e54a3f-C13.tif	6	26	0	0
6_5fc65d1e54a3f-C13.tif	6	27	0	0
6_5fc65d1e54a3f-C13.tif	6	28	0	0
6_5fc65d1e54a3f-C13.tif	6	29	0	0
6_5fc65d1e54a3f-C13.tif	6	30	0	0
6_5fc65d1e54a3f-C13.tif	6	31	0	0
6_5fc65d1e54a3f-C13.tif	6	32	0	0
6_5fc65d1e54a3f-C13.tif	6	33	0	0
7_5fc65d1e5b658-C13.tif	7	1	0	0
7_5fc65d1e5b658-C13.tif	7	2	0	0
7_5fc65d1e5b658-C13.tif	7	3	0	0
7_5fc65d1e5b658-C13.tif	7	4	57	1988
7_5fc65d1e5b658-C13.tif	7	5	0	0
7_5fc65d1e5b658-C13.tif	7	6	0	0
7_5fc65d1e5b658-C13.tif	7	7	0	0
7_5fc65d1e5b658-C13.tif	7	8	0	0
7_5fc65d1e5b658-C13.tif	7	9	0	0
7_5fc65d1e5b658-C13.tif	7	10	0	0
7_5fc65d1e5b658-C13.tif	7	11	0	0
7_5fc65d1e5b658-C13.tif	7	12	0	0
7_5fc65d1e5b658-C13.tif	7	13	0	0
7_5fc65d1e5b658-C13.tif	7	14	0	0
7_5fc65d1e5b658-C13.tif	7	15	0	1988
7_5fc65d1e5b658-C13.tif	7	16	0	0
7_5fc65d1e5b658-C13.tif	7	17	0	0
7_5fc65d1e5b658-C13.tif	7	18	0	0
7_5fc65d1e5b658-C13.tif	7	19	0	0
7_5fc65d1e5b658-C13.tif	7	20	0	0
7_5fc65d1e5b658-C13.tif	7	21	0	0
7_5fc65d1e5b658-C13.tif	7	22	0	1988
7_5fc65d1e5b658-C13.tif	7	23	0	0
7_5fc65d1e5b658-C13.tif	7	24	0	0
7_5fc65d1e5b658-C13.tif	7	25	0	0
7_5fc65d1e5b658-C13.tif	7	26	0	0
7_5fc65d1e5b658-C13.tif	7	27	0	0
8_5fc65d1e5af9d-C13.tif	8	1	0	0
8_5fc65d1e5af9d-C13.tif	8	2	0	0
8_5fc65d1e5af9d-C13.tif	8	3	0	0
8_5fc65d1e5af9d-C13.tif	8	4	0	0
8_5fc65d1e5af9d-C13.tif	8	5	0	1297
8_5fc65d1e5af9d-C13.tif	8	6	0	0
8_5fc65d1e5af9d-C13.tif	8	7	0	0
8_5fc65d1e5af9d-C13.tif	8	8	0	0
8_5fc65d1e5af9d-C13.tif	8	9	0	0
8_5fc65d1e5af9d-C13.tif	8	10	0	0
8_5fc65d1e5af9d-C13.tif	8	11	0	0
8_5fc65d1e5af9d-C13.tif	8	12	0	0
8_5fc65d1e5af9d-C13.tif	8	13	0	0
8_5fc65d1e5af9d-C13.tif	8	14	0	0
8_5fc65d1e5af9d-C13.tif	8	15	0	0
8_5fc65d1e5af9d-C13.tif	8	16	0	0
8_5fc65d1e5af9d-C13.tif	8	17	0	0
8_5fc65d1e5af9d-C13.tif	8	18	0	0
8_5fc65d1e5af9d-C13.tif	8	19	0	0
8_5fc65d1e5af9d-C13.tif	8	20	0	0
8_5fc65d1e5af9d-C13.tif	8	21	0	0
8_5fc65d1e5af9d-C13.tif	8	22	0	0
9_5fc65d1e5a242-C13.tif	9	1	0	101
9_5fc65d1e5a242-C13.tif	9	2	186	0
9_5fc65d1e5a242-C13.tif	9	3	0	0
9_5fc65d1e5a242-C13.tif	9	4	0	0
9_5fc65d1e5a242-C13.tif	9	5	0	0
9_5fc65d1e5a242-C13.tif	9	6	0	0
9_5fc65d1e5a242-C13.tif	9	7	0	0
9_5fc65d1e5a242-C13.tif	9	8	0	0
9_5fc65d1e5a242-C13.tif	9	9	0	0
9_5fc65d1e5a242-C13.tif	9	10	0	0
9_5fc65d1e5a242-C13.tif	9	11	0	0
9_5fc65d1e5a242-C13.tif	9	12	0	0
9_5fc65d1e5a242-C13.tif	9	13	0	0

## Sheet: Fig.3_FS3-B_2d_DJx53BP1xPML
			SIZE coloc	SIZE coloc		Final_colocalization of individual DJ object with (x-53BP1_y-PML)
analyzed nucleoli_original name	ID of individual nucleoli	DJ object ID	DJ/53BP1	DJ/PML
10A_5fc10f222866f-C14.tif	10A	1	0	0
10A_5fc10f222866f-C14.tif	10A	2	86	1060
10A_5fc10f222866f-C14.tif	10A	3	41	1060
10A_5fc10f222866f-C14.tif	10A	4	0	0
10A_5fc10f222866f-C14.tif	10A	5	0	0
10A_5fc10f222866f-C14.tif	10A	6	0	0
10A_5fc10f222866f-C14.tif	10A	7	0	1060
10A_5fc10f222866f-C14.tif	10A	8	0	0
10A_5fc10f222866f-C14.tif	10A	9	0	0
10A_5fc10f222866f-C14.tif	10A	10	0	0
10B_5fc10f222866f-C14.tif	10B	1	311	1535
10B_5fc10f222866f-C14.tif	10B	2	0	0
10B_5fc10f222866f-C14.tif	10B	3	55	0
10B_5fc10f222866f-C14.tif	10B	4	0	0
10B_5fc10f222866f-C14.tif	10B	5	0	0
10B_5fc10f222866f-C14.tif	10B	6	0	0
10B_5fc10f222866f-C14.tif	10B	7	0	0
10B_5fc10f222866f-C14.tif	10B	8	0	0
10B_5fc10f222866f-C14.tif	10B	9	0	0
10B_5fc10f222866f-C14.tif	10B	10	0	0
10B_5fc10f222866f-C14.tif	10B	11	0	0
10B_5fc10f222866f-C14.tif	10B	12	0	158
11_5fc10f222649c-C14.tif	11	1	0	0
11_5fc10f222649c-C14.tif	11	2	0	2386
11_5fc10f222649c-C14.tif	11	3	0	0
12_5fc10f22256e6-C14.tif	12	1	1037	1670
12_5fc10f22256e6-C14.tif	12	2	0	0
12_5fc10f22256e6-C14.tif	12	3	0	0
12_5fc10f22256e6-C14.tif	12	4	0	0
12_5fc10f22256e6-C14.tif	12	5	233	1670
12_5fc10f22256e6-C14.tif	12	6	0	0
12_5fc10f22256e6-C14.tif	12	7	30	1670
12_5fc10f22256e6-C14.tif	12	8	0	0
12_5fc10f22256e6-C14.tif	12	9	0	0
12_5fc10f22256e6-C14.tif	12	10	0	0
				0
13_5fc10f2229c34-C14.tif	13	1	0	0
13_5fc10f2229c34-C14.tif	13	2	0	2648
13_5fc10f2229c34-C14.tif	13	3	0	0
13_5fc10f2229c34-C14.tif	13	4	43	2648
13_5fc10f2229c34-C14.tif	13	5	0	2648
13_5fc10f2229c34-C14.tif	13	6	0	2648
13_5fc10f2229c34-C14.tif	13	7	0	2648
13_5fc10f2229c34-C14.tif	13	8	0	0
13_5fc10f2229c34-C14.tif	13	9	0	0
13_5fc10f2229c34-C14.tif	13	10	0	0
13_5fc10f2229c34-C14.tif	13	11	0	0
13_5fc10f2229c34-C14.tif	13	12	0	0
14_5fc10f2228e21-C14.tif	14	1	0	0
14_5fc10f2228e21-C14.tif	14	2	0	0
14_5fc10f2228e21-C14.tif	14	3	0	0
14_5fc10f2228e21-C14.tif	14	4	0	0
14_5fc10f2228e21-C14.tif	14	5	0	0
14_5fc10f2228e21-C14.tif	14	6	0	0
14_5fc10f2228e21-C14.tif	14	7	0	0
14_5fc10f2228e21-C14.tif	14	8	0	0
14_5fc10f2228e21-C14.tif	14	9	0	0
14_5fc10f2228e21-C14.tif	14	10	0	0
14_5fc10f2228e21-C14.tif	14	11	0	0
15_5fc10f2227f28-C14.tif	15	1	0	0
15_5fc10f2227f28-C14.tif	15	2	0	0
15_5fc10f2227f28-C14.tif	15	3	34.8	1246
15_5fc10f2227f28-C14.tif	15	4	0	0
16_5fc10f2226b20-C14.tif	16	1	0	0
16_5fc10f2226b20-C14.tif	16	2	62	2772
16_5fc10f2226b20-C14.tif	16	3	0	2772
16_5fc10f2226b20-C14.tif	16	4	0	0
16_5fc10f2226b20-C14.tif	16	5	0	0
16_5fc10f2226b20-C14.tif	16	6	0	0
16_5fc10f2226b20-C14.tif	16	7	35	0
16_5fc10f2226b20-C14.tif	16	8	0	0
16_5fc10f2226b20-C14.tif	16	9	439.111	2772
16_5fc10f2226b20-C14.tif	16	10	0	0
17_5fc10f2225de4-C14.tif	17	1	0	0
17_5fc10f2225de4-C14.tif	17	2	0	0
17_5fc10f2225de4-C14.tif	17	3	0	0
17_5fc10f2225de4-C14.tif	17	4	0	0
17_5fc10f2225de4-C14.tif	17	5	0	0
17_5fc10f2225de4-C14.tif	17	6	0	0
17_5fc10f2225de4-C14.tif	17	7	0	0
17_5fc10f2225de4-C14.tif	17	8	0	0
17_5fc10f2225de4-C14.tif	17	9	0	0
17_5fc10f2225de4-C14.tif	17	10	0	0
17_5fc10f2225de4-C14.tif	17	11	0	0
17_5fc10f2225de4-C14.tif	17	12	54	0
18_5fc10f222fadf-C14.tif	18	1	0	0
18_5fc10f222fadf-C14.tif	18	2	0	0
18_5fc10f222fadf-C14.tif	18	3	0	0
18_5fc10f222fadf-C14.tif	18	4	26	0
19_5fc10f222f427-C14.tif	19	1	0	0
19_5fc10f222f427-C14.tif	19	2	125.446	2920
19_5fc10f222f427-C14.tif	19	3	0	0
19_5fc10f222f427-C14.tif	19	4	0	0
19_5fc10f222f427-C14.tif	19	5	0	2920
19_5fc10f222f427-C14.tif	19	6	0	0
19_5fc10f222f427-C14.tif	19	7	0	0
19_5fc10f222f427-C14.tif	19	8	0	0
19_5fc10f222f427-C14.tif	19	9	0	0
19_5fc10f222f427-C14.tif	19	10	0	2920
19_5fc10f222f427-C14.tif	19	11	0	0
19_5fc10f222f427-C14.tif	19	12	0	0
1_5fc10f222c82e-C14.tif	1	1	0	0
1_5fc10f222c82e-C14.tif	1	2	0	0
1_5fc10f222c82e-C14.tif	1	3	0	0
1_5fc10f222c82e-C14.tif	1	4	0	0
1_5fc10f222c82e-C14.tif	1	5	0	0
1_5fc10f222c82e-C14.tif	1	6	0	0
1_5fc10f222c82e-C14.tif	1	7	0	0
1_5fc10f222c82e-C14.tif	1	8	0	0
1_5fc10f222c82e-C14.tif	1	9	0	0
1_5fc10f222c82e-C14.tif	1	10	0	0
20_5fc10f222ede3-C14.tif	20	1	329	861.766
20_5fc10f222ede3-C14.tif	20	2	0	914
20_5fc10f222ede3-C14.tif	20	3	0	0
20_5fc10f222ede3-C14.tif	20	4	0	0
20_5fc10f222ede3-C14.tif	20	5	0	0
20_5fc10f222ede3-C14.tif	20	6	0	0
20_5fc10f222ede3-C14.tif	20	7	0	0
21_5fc10f222e140-C14.tif	21	1	0	0
21_5fc10f222e140-C14.tif	21	2	0	0
21_5fc10f222e140-C14.tif	21	3	0	0
21_5fc10f222e140-C14.tif	21	4	0	0
21_5fc10f222e140-C14.tif	21	5	0	0
22_5fc10f222e79a-C14.tif	22	1	59	2582
22_5fc10f222e79a-C14.tif	22	2	0	2582
22_5fc10f222e79a-C14.tif	22	3	0	2582
22_5fc10f222e79a-C14.tif	22	4	0	2582
22_5fc10f222e79a-C14.tif	22	5	0	2582
22_5fc10f222e79a-C14.tif	22	6	0	0
22_5fc10f222e79a-C14.tif	22	7	0	0
22_5fc10f222e79a-C14.tif	22	8	0	2582
23_5fc10f222db3a-C14.tif	23	1	128	157
23_5fc10f222db3a-C14.tif	23	2	114	0
23_5fc10f222db3a-C14.tif	23	3	0	0
23_5fc10f222db3a-C14.tif	23	4	0	0
23_5fc10f222db3a-C14.tif	23	5	0	0
23_5fc10f222db3a-C14.tif	23	6	0	0
23_5fc10f222db3a-C14.tif	23	7	0	0
24_5fc10f222d502-C14.tif	24	1	0	0
24_5fc10f222d502-C14.tif	24	2	0	0
24_5fc10f222d502-C14.tif	24	3	92	0
24_5fc10f222d502-C14.tif	24	4	0	0
24_5fc10f222d502-C14.tif	24	5	0	0
24_5fc10f222d502-C14.tif	24	6	0	0
25_5fc10f222ce73-C14.tif	25	1	0	0
25_5fc10f222ce73-C14.tif	25	2	0	0
25_5fc10f222ce73-C14.tif	25	3	52	1624
25_5fc10f222ce73-C14.tif	25	4	0	1624
25_5fc10f222ce73-C14.tif	25	5	0	0
25_5fc10f222ce73-C14.tif	25	6	0	0
2_5fc10f222c1eb-C14.tif	2	1	0	0
2_5fc10f222c1eb-C14.tif	2	2	83	0
2_5fc10f222c1eb-C14.tif	2	3	262	1784
2_5fc10f222c1eb-C14.tif	2	4	0	0
2_5fc10f222c1eb-C14.tif	2	5	0	0
2_5fc10f222c1eb-C14.tif	2	6	414	1784
2_5fc10f222c1eb-C14.tif	2	7	414	1784
2_5fc10f222c1eb-C14.tif	2	8	0	1784
3_5fc10f222bb90-C14.tif	3	1	0	0
3_5fc10f222bb90-C14.tif	3	2	0	0
3_5fc10f222bb90-C14.tif	3	3	0	0
3_5fc10f222bb90-C14.tif	3	4	0	0
3_5fc10f222bb90-C14.tif	3	5	0	3036
3_5fc10f222bb90-C14.tif	3	6	0	0
3_5fc10f222bb90-C14.tif	3	7	0	0
4_5fc10f222b534-C14.tif	4	1	0	57.2
4_5fc10f222b534-C14.tif	4	2	0	0
4_5fc10f222b534-C14.tif	4	3	0	0
4_5fc10f222b534-C14.tif	4	4	0	0
4_5fc10f222b534-C14.tif	4	5	0	0
5_5fc10f222aef5-C14.tif	5	1	0	0
5_5fc10f222aef5-C14.tif	5	2	0	0
5_5fc10f222aef5-C14.tif	5	3	0	0
5_5fc10f222aef5-C14.tif	5	4	20	0
5_5fc10f222aef5-C14.tif	5	5	0	0
5_5fc10f222aef5-C14.tif	5	6	0	0
5_5fc10f222aef5-C14.tif	5	7	0	0
5_5fc10f222aef5-C14.tif	5	8	0	0
5_5fc10f222aef5-C14.tif	5	9	0	1537
6A_5fc10f222a8c3-C14.tif	6A	1	0	0
6A_5fc10f222a8c3-C14.tif	6A	2	0	0
6A_5fc10f222a8c3-C14.tif	6A	3	148	1592
6A_5fc10f222a8c3-C14.tif	6A	4	0	0
6A_5fc10f222a8c3-C14.tif	6A	5	0	0
6A_5fc10f222a8c3-C14.tif	6A	6	0	0
6A_5fc10f222a8c3-C14.tif	6A	7	0	0
6A_5fc10f222a8c3-C14.tif	6A	8	0	1592
6B_5fc10f222a8c3-C14.tif	6B	1	0	0
6B_5fc10f222a8c3-C14.tif	6B	2	0	0
6B_5fc10f222a8c3-C14.tif	6B	3	22	1170
6B_5fc10f222a8c3-C14.tif	6B	4	0	0
6_5fc10f222a281-C14.tif	6	1	0	0
6_5fc10f222a281-C14.tif	6	2	0	0
6_5fc10f222a281-C14.tif	6	3	0	0
6_5fc10f222a281-C14.tif	6	4	0	0
6_5fc10f222a281-C14.tif	6	5	0	0
6_5fc10f222a281-C14.tif	6	6	0	0
7_5fc10f2229502-C14.tif	7	1	0	0
7_5fc10f2229502-C14.tif	7	2	0	0
7_5fc10f2229502-C14.tif	7	3	0	0
7_5fc10f2229502-C14.tif	7	4	0	0
7_5fc10f2229502-C14.tif	7	5	875	1552
7_5fc10f2229502-C14.tif	7	6	80	0
7_5fc10f2229502-C14.tif	7	7	0	0
7_5fc10f2229502-C14.tif	7	8	0	0
7_5fc10f2229502-C14.tif	7	9	0	0
8_5fc10f2227176-C14.tif	8	1	0	0
8_5fc10f2227176-C14.tif	8	2	0	0
8_5fc10f2227176-C14.tif	8	3	0	0
8_5fc10f2227176-C14.tif	8	4	0	0
8_5fc10f2227176-C14.tif	8	5	0	0
8_5fc10f2227176-C14.tif	8	6	0	0
8_5fc10f2227176-C14.tif	8	7	0	0
8_5fc10f2227176-C14.tif	8	8	0	0
8_5fc10f2227176-C14.tif	8	9	0	0
9_5fc10f223012d-C14.tif	9	1	0	0
9_5fc10f223012d-C14.tif	9	2	0	0
9_5fc10f223012d-C14.tif	9	3	0	1076
9_5fc10f223012d-C14.tif	9	4	25	1076
9_5fc10f223012d-C14.tif	9	5	0	0
9_5fc10f223012d-C14.tif	9	6	72	0
9_5fc10f223012d-C14.tif	9	7	141	1076
9_5fc10f223012d-C14.tif	9	8	0	0
9_5fc10f223012d-C14.tif	9	9	0	0

## Sheet: Fig.3_FS3-B_2d_rDNAx53BP1xPML
	C:\Users\Pavla\Desktop\Exp20-15-V colocal\2d doxo crop 125x125\PNAs\C13\0.1-0.2_0.155-0.2_50-20_1.28-1.42_bcg10_2023-02-23														Final_colocalization of individual rDNA object with (x-53BP1_y-PML)
			SIZE coloc	SIZE coloc
analyzed nucleoli_original name	ID of individual nucleoli	rDNA object ID	rDNA/53BP1	rDNA/PML
10A_5fc10f222866f-C13.tif	10A	1	0	0
10A_5fc10f222866f-C13.tif	10A	2	0	0
10A_5fc10f222866f-C13.tif	10A	3	0	0
10A_5fc10f222866f-C13.tif	10A	4	0	0
10A_5fc10f222866f-C13.tif	10A	5	0	0
10A_5fc10f222866f-C13.tif	10A	6	0	1060
10A_5fc10f222866f-C13.tif	10A	7	0	0
10A_5fc10f222866f-C13.tif	10A	8	0	0
10A_5fc10f222866f-C13.tif	10A	9	0	0
10A_5fc10f222866f-C13.tif	10A	10	0	0
10A_5fc10f222866f-C13.tif	10A	11	0	0
10A_5fc10f222866f-C13.tif	10A	12	0	0
10B_5fc10f222866f-C13.tif	10B	1	0	0
10B_5fc10f222866f-C13.tif	10B	2	0	0
10B_5fc10f222866f-C13.tif	10B	3	0	0
10B_5fc10f222866f-C13.tif	10B	4	0	0
10B_5fc10f222866f-C13.tif	10B	5	0	0
10B_5fc10f222866f-C13.tif	10B	6	311	1535
10B_5fc10f222866f-C13.tif	10B	7	0	0
10B_5fc10f222866f-C13.tif	10B	8	0	0
10B_5fc10f222866f-C13.tif	10B	9	0	0
10B_5fc10f222866f-C13.tif	10B	10	0	0
10B_5fc10f222866f-C13.tif	10B	11	0	0
10B_5fc10f222866f-C13.tif	10B	12	0	0
10B_5fc10f222866f-C13.tif	10B	13	0	0
10B_5fc10f222866f-C13.tif	10B	14	0	0
10B_5fc10f222866f-C13.tif	10B	15	0	0
11_5fc10f222649c-C13.tif	11	1	0	0
11_5fc10f222649c-C13.tif	11	2	0	0
11_5fc10f222649c-C13.tif	11	3	0	0
11_5fc10f222649c-C13.tif	11	4	0	0
11_5fc10f222649c-C13.tif	11	5	0	0
11_5fc10f222649c-C13.tif	11	6	0	0
11_5fc10f222649c-C13.tif	11	7	0	0
11_5fc10f222649c-C13.tif	11	8	0	0
11_5fc10f222649c-C13.tif	11	9	0	0
11_5fc10f222649c-C13.tif	11	10	0	0
	11	11	0	0
12_5fc10f22256e6-C13.tif	12	1	0	0
12_5fc10f22256e6-C13.tif	12	2	879.603	1670
12_5fc10f22256e6-C13.tif	12	3	0	0
12_5fc10f22256e6-C13.tif	12	4	0	0
12_5fc10f22256e6-C13.tif	12	5	0	0
12_5fc10f22256e6-C13.tif	12	6	0	0
12_5fc10f22256e6-C13.tif	12	7	0	0
13_5fc10f2229c34-C13.tif	13	1	0	0
13_5fc10f2229c34-C13.tif	13	2	0	0
13_5fc10f2229c34-C13.tif	13	3	0	0
13_5fc10f2229c34-C13.tif	13	4	0	0
13_5fc10f2229c34-C13.tif	13	5	0	0
13_5fc10f2229c34-C13.tif	13	6	0	0
13_5fc10f2229c34-C13.tif	13	7	0	0
13_5fc10f2229c34-C13.tif	13	8	0	0
13_5fc10f2229c34-C13.tif	13	9	0	0
13_5fc10f2229c34-C13.tif	13	10	0	2648
13_5fc10f2229c34-C13.tif	13	11	0	0
13_5fc10f2229c34-C13.tif	13	12	0	0
14_5fc10f2228e21-C13.tif	14	1	0	0
14_5fc10f2228e21-C13.tif	14	2	0	0
14_5fc10f2228e21-C13.tif	14	3	0	0
14_5fc10f2228e21-C13.tif	14	4	0	2679
14_5fc10f2228e21-C13.tif	14	5	0	0
14_5fc10f2228e21-C13.tif	14	6	51	0
14_5fc10f2228e21-C13.tif	14	7	0	0
14_5fc10f2228e21-C13.tif	14	8	0	0
14_5fc10f2228e21-C13.tif	14	9	0	0
14_5fc10f2228e21-C13.tif	14	10	0	0
14_5fc10f2228e21-C13.tif	14	11	0	0
14_5fc10f2228e21-C13.tif	14	12	0	0
15_5fc10f2227f28-C13.tif	15	1	23	1246
15_5fc10f2227f28-C13.tif	15	2	0	0
15_5fc10f2227f28-C13.tif	15	3	0	0
15_5fc10f2227f28-C13.tif	15	4	0	0
15_5fc10f2227f28-C13.tif	15	5	0	0
15_5fc10f2227f28-C13.tif	15	6	0	0
15_5fc10f2227f28-C13.tif	15	7	0	0
15_5fc10f2227f28-C13.tif	15	8	0	0
15_5fc10f2227f28-C13.tif	15	9	0	0
15_5fc10f2227f28-C13.tif	15	10	0	0
15_5fc10f2227f28-C13.tif	15	11	0	0
15_5fc10f2227f28-C13.tif	15	12	0	0
15_5fc10f2227f28-C13.tif	15	13	0	0
15_5fc10f2227f28-C13.tif	15	14	0	0
15_5fc10f2227f28-C13.tif	15	15	0	0
15_5fc10f2227f28-C13.tif	15	16	0	0
16_5fc10f2226b20-C13.tif	1	1	695	2772
16_5fc10f2226b20-C13.tif	2	2	0	2772
16_5fc10f2226b20-C13.tif	3	3	0	0
16_5fc10f2226b20-C13.tif	4	4	0	0
16_5fc10f2226b20-C13.tif	5	5	0	0
16_5fc10f2226b20-C13.tif	6	6	0	0
16_5fc10f2226b20-C13.tif	7	7	0	0
16_5fc10f2226b20-C13.tif	8	8	35	0
16_5fc10f2226b20-C13.tif	9	9	0	2772
16_5fc10f2226b20-C13.tif	10	10	695	0
17_5fc10f2225de4-C13.tif	17	1	0	0
17_5fc10f2225de4-C13.tif	17	2	0	0
17_5fc10f2225de4-C13.tif	17	3	0	0
17_5fc10f2225de4-C13.tif	17	4	0	0
17_5fc10f2225de4-C13.tif	17	5	0	0
17_5fc10f2225de4-C13.tif	17	6	0	0
17_5fc10f2225de4-C13.tif	17	7	738	1817
17_5fc10f2225de4-C13.tif	17	8	0	0
17_5fc10f2225de4-C13.tif	17	9	0	0
17_5fc10f2225de4-C13.tif	17	10	0	0
17_5fc10f2225de4-C13.tif	17	11	0	0
17_5fc10f2225de4-C13.tif	17	12	0	0
17_5fc10f2225de4-C13.tif	17	13	0	0
17_5fc10f2225de4-C13.tif	17	14	0	0
18_5fc10f222fadf-C13.tif	18	1	0	0
18_5fc10f222fadf-C13.tif	18	2	172	0
18_5fc10f222fadf-C13.tif	18	3	0	0
18_5fc10f222fadf-C13.tif	18	4	106.4	0
18_5fc10f222fadf-C13.tif	18	5	83	0
18_5fc10f222fadf-C13.tif	18	6	0	0
18_5fc10f222fadf-C13.tif	18	7	0	0
18_5fc10f222fadf-C13.tif	18	8	0	0
18_5fc10f222fadf-C13.tif	18	9	0	0
18_5fc10f222fadf-C13.tif	18	10	0	0
18_5fc10f222fadf-C13.tif	18	11	0	0
18_5fc10f222fadf-C13.tif	18	12	0	0
18_5fc10f222fadf-C13.tif	18	13	0	0
19_5fc10f222f427-C13.tif	19	1	0	0
19_5fc10f222f427-C13.tif	19	2	0	0
19_5fc10f222f427-C13.tif	19	3	0	0
19_5fc10f222f427-C13.tif	19	4	0	0
19_5fc10f222f427-C13.tif	19	5	0	0
19_5fc10f222f427-C13.tif	19	6	0	0
19_5fc10f222f427-C13.tif	19	7	0	0
19_5fc10f222f427-C13.tif	19	8	0	2920
19_5fc10f222f427-C13.tif	19	9	0	0
19_5fc10f222f427-C13.tif	19	10	0	0
19_5fc10f222f427-C13.tif	19	11	0	0
19_5fc10f222f427-C13.tif	19	12	0	0
19_5fc10f222f427-C13.tif	19	13	0	0
19_5fc10f222f427-C13.tif	19	14	0	0
19_5fc10f222f427-C13.tif	19	15	0	0
19_5fc10f222f427-C13.tif	19	16	120.333	2920
19_5fc10f222f427-C13.tif	19	17	0	0
1_5fc10f222c82e-C13.tif	1	1	0	0
1_5fc10f222c82e-C13.tif	1	2	0	0
1_5fc10f222c82e-C13.tif	1	3	0	0
1_5fc10f222c82e-C13.tif	1	4	0	0
1_5fc10f222c82e-C13.tif	1	5	0	0
1_5fc10f222c82e-C13.tif	1	6	0	0
1_5fc10f222c82e-C13.tif	1	7	0	0
1_5fc10f222c82e-C13.tif	1	8	0	0
20_5fc10f222ede3-C13.tif	20	1	0	0
20_5fc10f222ede3-C13.tif	20	2	0	0
20_5fc10f222ede3-C13.tif	20	3	0	0
20_5fc10f222ede3-C13.tif	20	4	0	0
20_5fc10f222ede3-C13.tif	20	5	0	0
20_5fc10f222ede3-C13.tif	20	6	0	0
20_5fc10f222ede3-C13.tif	20	7	99	468.674
20_5fc10f222ede3-C13.tif	20	8	0	0
20_5fc10f222ede3-C13.tif	20	9	0	866.098
20_5fc10f222ede3-C13.tif	20	10	0	0
21_5fc10f222e140-C13.tif	21	1	0	0
21_5fc10f222e140-C13.tif	21	2	0	0
21_5fc10f222e140-C13.tif	21	3	0	0
21_5fc10f222e140-C13.tif	21	4	0	0
21_5fc10f222e140-C13.tif	21	5	0	0
21_5fc10f222e140-C13.tif	21	6	0	0
21_5fc10f222e140-C13.tif	21	7	0	0
21_5fc10f222e140-C13.tif	21	8	0	0
21_5fc10f222e140-C13.tif	21	9	0	0
22_5fc10f222e79a-C13.tif	22	1	0	2582
22_5fc10f222e79a-C13.tif	22	2	59	2582
22_5fc10f222e79a-C13.tif	22	3	0	0
22_5fc10f222e79a-C13.tif	22	4	0	2582
22_5fc10f222e79a-C13.tif	22	5	0	1529.86
22_5fc10f222e79a-C13.tif	22	6	0	2582
23_5fc10f222db3a-C13.tif	23	1	0	0
23_5fc10f222db3a-C13.tif	23	2	0	0
23_5fc10f222db3a-C13.tif	23	3	0	0
23_5fc10f222db3a-C13.tif	23	4	0	0
23_5fc10f222db3a-C13.tif	23	5	0	0
23_5fc10f222db3a-C13.tif	23	6	0	0
23_5fc10f222db3a-C13.tif	23	7	0	0
23_5fc10f222db3a-C13.tif	23	8	0	0
23_5fc10f222db3a-C13.tif	23	9	0	0
23_5fc10f222db3a-C13.tif	23	10	0	0
23_5fc10f222db3a-C13.tif	23	11	0	0
23_5fc10f222db3a-C13.tif	23	12	0	0
23_5fc10f222db3a-C13.tif	23	13	0	0
23_5fc10f222db3a-C13.tif	23	14	0	0
23_5fc10f222db3a-C13.tif	23	15	0	0
24_5fc10f222d502-C13.tif	24	1	92	1468
24_5fc10f222d502-C13.tif	24	2	0	0
24_5fc10f222d502-C13.tif	24	3	90	1468
24_5fc10f222d502-C13.tif	24	4	0	0
24_5fc10f222d502-C13.tif	24	5	0	0
24_5fc10f222d502-C13.tif	24	6	0	0
24_5fc10f222d502-C13.tif	24	7	0	0
24_5fc10f222d502-C13.tif	24	8	0	0
24_5fc10f222d502-C13.tif	24	9	125.423	0
24_5fc10f222d502-C13.tif	24	10	0	0
24_5fc10f222d502-C13.tif	24	11	0	0
24_5fc10f222d502-C13.tif	24	12	219	0
25_5fc10f222ce73-C13.tif	25	1	0	0
25_5fc10f222ce73-C13.tif	25	2	0	0
25_5fc10f222ce73-C13.tif	25	3	0	1624
25_5fc10f222ce73-C13.tif	25	4	0	0
25_5fc10f222ce73-C13.tif	25	5	0	1624
25_5fc10f222ce73-C13.tif	25	6	0	0
25_5fc10f222ce73-C13.tif	25	7	0	0
25_5fc10f222ce73-C13.tif	25	8	0	0
25_5fc10f222ce73-C13.tif	25	9	0	22
25_5fc10f222ce73-C13.tif	25	10	0	0
25_5fc10f222ce73-C13.tif	25	11	0	0
25_5fc10f222ce73-C13.tif	25	12	0	0
25_5fc10f222ce73-C13.tif	25	13	0	0
25_5fc10f222ce73-C13.tif	25	14	0	1624
25_5fc10f222ce73-C13.tif	25	15	0	0
2_5fc10f222c1eb-C13.tif	2	1	0	0
2_5fc10f222c1eb-C13.tif	2	2	414	1784
2_5fc10f222c1eb-C13.tif	2	3	0	0
2_5fc10f222c1eb-C13.tif	2	4	0	0
2_5fc10f222c1eb-C13.tif	2	5	0	0
2_5fc10f222c1eb-C13.tif	2	6	0	0
2_5fc10f222c1eb-C13.tif	2	7	0	0
2_5fc10f222c1eb-C13.tif	2	8	0	0
2_5fc10f222c1eb-C13.tif	2	9	0	0
2_5fc10f222c1eb-C13.tif	2	10	262	1784
3_5fc10f222bb90-C13.tif	3	1	0	0
3_5fc10f222bb90-C13.tif	3	2	0	0
3_5fc10f222bb90-C13.tif	3	3	0	0
3_5fc10f222bb90-C13.tif	3	4	0	0
3_5fc10f222bb90-C13.tif	3	5	0	0
3_5fc10f222bb90-C13.tif	3	6	57	3036
3_5fc10f222bb90-C13.tif	3	7	0	0
3_5fc10f222bb90-C13.tif	3	8	0	3036
3_5fc10f222bb90-C13.tif	3	9	0	0
3_5fc10f222bb90-C13.tif	3	10	0	0
3_5fc10f222bb90-C13.tif	3	11	0	0
3_5fc10f222bb90-C13.tif	3	12	0	0
3_5fc10f222bb90-C13.tif	3	13	0	0
3_5fc10f222bb90-C13.tif	3	14	0	0
3_5fc10f222bb90-C13.tif	3	15	49	0
3_5fc10f222bb90-C13.tif	3	16	200	3036
3_5fc10f222bb90-C13.tif	3	17	0	0
3_5fc10f222bb90-C13.tif	3	18	0	0
3_5fc10f222bb90-C13.tif	3	19	0	0
3_5fc10f222bb90-C13.tif	3	20	0	0
3_5fc10f222bb90-C13.tif	3	21	0	0
3_5fc10f222bb90-C13.tif	3	22	0	0
3_5fc10f222bb90-C13.tif	3	23	0	0
3_5fc10f222bb90-C13.tif	3	24	0	0
3_5fc10f222bb90-C13.tif	3	25	0	0
3_5fc10f222bb90-C13.tif	3	26	0	0
4_5fc10f222b534-C13.tif	4	1	0	0
4_5fc10f222b534-C13.tif	4	2	0	0
4_5fc10f222b534-C13.tif	4	3	0	64
4_5fc10f222b534-C13.tif	4	4	0	0
4_5fc10f222b534-C13.tif	4	5	0	0
4_5fc10f222b534-C13.tif	4	6	0	0
4_5fc10f222b534-C13.tif	4	7	0	0
4_5fc10f222b534-C13.tif	4	8	0	0
4_5fc10f222b534-C13.tif	4	9	0	0
5_5fc10f222aef5-C13.tif	5	1	0	0
5_5fc10f222aef5-C13.tif	5	2	0	0
6A_5fc10f222a8c3-C13.tif	6A	1	0	0
6A_5fc10f222a8c3-C13.tif	6A	2	0	0
6A_5fc10f222a8c3-C13.tif	6A	3	0	0
6A_5fc10f222a8c3-C13.tif	6A	4	0	0
6A_5fc10f222a8c3-C13.tif	6A	5	0	0
6A_5fc10f222a8c3-C13.tif	6A	6	0	0
6A_5fc10f222a8c3-C13.tif	6A	7	0	0
6A_5fc10f222a8c3-C13.tif	6A	8	0	0
6A_5fc10f222a8c3-C13.tif	6A	9	0	0
6A_5fc10f222a8c3-C13.tif	6A	10	0	0
6A_5fc10f222a8c3-C13.tif	6A	11	0	0
6A_5fc10f222a8c3-C13.tif	6A	12	0	0
6A_5fc10f222a8c3-C13.tif	6A	13	0	0
6A_5fc10f222a8c3-C13.tif	6A	14	0	0
6A_5fc10f222a8c3-C13.tif	6A	15	0	0
6A_5fc10f222a8c3-C13.tif	6A	16	0	0
6A_5fc10f222a8c3-C13.tif	6A	17	0	0
6A_5fc10f222a8c3-C13.tif	6A	18	230	1592
6A_5fc10f222a8c3-C13.tif	6A	19	0	0
6A_5fc10f222a8c3-C13.tif	6A	20	0	0
6A_5fc10f222a8c3-C13.tif	6A	21	0	0
6A_5fc10f222a8c3-C13.tif	6A	22	0	0
6A_5fc10f222a8c3-C13.tif	6A	23	0	0
6A_5fc10f222a8c3-C13.tif	6A	24	0	0
6A_5fc10f222a8c3-C13.tif	6A	25	178.067	1592
6A_5fc10f222a8c3-C13.tif	6A	26	0	0
6A_5fc10f222a8c3-C13.tif	6A	27	0	0
6A_5fc10f222a8c3-C13.tif	6A	28	37	0
6A_5fc10f222a8c3-C13.tif	6A	29	0	0
6A_5fc10f222a8c3-C13.tif	6A	30	0	0
6A_5fc10f222a8c3-C13.tif	6A	31	0	0
6B_5fc10f222a8c3-C13.tif	6B	1	0	0
6B_5fc10f222a8c3-C13.tif	6B	2	0	0
6B_5fc10f222a8c3-C13.tif	6B	3	0	0
6B_5fc10f222a8c3-C13.tif	6B	4	0	0
6_5fc10f222a281-C13.tif	6	1	0	0
6_5fc10f222a281-C13.tif	6	2	0	0
6_5fc10f222a281-C13.tif	6	3	0	0
6_5fc10f222a281-C13.tif	6	4	0	0
6_5fc10f222a281-C13.tif	6	5	0	0
6_5fc10f222a281-C13.tif	6	6	29	68
6_5fc10f222a281-C13.tif	6	7	0	0
6_5fc10f222a281-C13.tif	6	8	204	0
6_5fc10f222a281-C13.tif	6	9	0	0
6_5fc10f222a281-C13.tif	6	10	818	30
6_5fc10f222a281-C13.tif	6	11	0	0
6_5fc10f222a281-C13.tif	6	12	818	1236
6_5fc10f222a281-C13.tif	6	13	0	0
6_5fc10f222a281-C13.tif	6	14	0	0
6_5fc10f222a281-C13.tif	6	15	0	0
6_5fc10f222a281-C13.tif	6	16	0	0
7_5fc10f2229502-C13.tif	7	1	0	0
7_5fc10f2229502-C13.tif	7	2	875	1552
7_5fc10f2229502-C13.tif	7	3	0	0
7_5fc10f2229502-C13.tif	7	4	0	0
7_5fc10f2229502-C13.tif	7	5	0	0
7_5fc10f2229502-C13.tif	7	6	875	1552
7_5fc10f2229502-C13.tif	7	7	0	0
7_5fc10f2229502-C13.tif	7	8	0	0
7_5fc10f2229502-C13.tif	7	9	0	0
8_5fc10f2227176-C13.tif	8	1	0	0
8_5fc10f2227176-C13.tif	8	2	0	0
8_5fc10f2227176-C13.tif	8	3	0	0
8_5fc10f2227176-C13.tif	8	4	0	0
8_5fc10f2227176-C13.tif	8	5	0	0
8_5fc10f2227176-C13.tif	8	6	0	0
8_5fc10f2227176-C13.tif	8	7	0	0
8_5fc10f2227176-C13.tif	8	8	0	0
8_5fc10f2227176-C13.tif	8	9	0	0
8_5fc10f2227176-C13.tif	8	10	0	0
9_5fc10f223012d-C13.tif	9	1	0	0
9_5fc10f223012d-C13.tif	9	2	0	0
9_5fc10f223012d-C13.tif	9	3	0	0
9_5fc10f223012d-C13.tif	9	4	25	1076
9_5fc10f223012d-C13.tif	9	5	0	0
9_5fc10f223012d-C13.tif	9	6	0	0
9_5fc10f223012d-C13.tif	9	7	0	0
9_5fc10f223012d-C13.tif	9	8	0	0
9_5fc10f223012d-C13.tif	9	9	0	0
9_5fc10f223012d-C13.tif	9	10	0	0
9_5fc10f223012d-C13.tif	9	11	0	0
9_5fc10f223012d-C13.tif	9	12	0	0
9_5fc10f223012d-C13.tif	9	13	0	0
9_5fc10f223012d-C13.tif	9	14	0	0
9_5fc10f223012d-C13.tif	9	15	0	0
9_5fc10f223012d-C13.tif	9	16	242	0
9_5fc10f223012d-C13.tif	9	17	0	0
9_5fc10f223012d-C13.tif	9	18	37	0
9_5fc10f223012d-C13.tif	9	19	0	0
9_5fc10f223012d-C13.tif	9	20	0	0
9_5fc10f223012d-C13.tif	9	21	0	0
9_5fc10f223012d-C13.tif	9	22	0	0
9_5fc10f223012d-C13.tif	9	23	141	1076
9_5fc10f223012d-C13.tif	9	24	0	0
9_5fc10f223012d-C13.tif	9	25	0	0
9_5fc10f223012d-C13.tif	9	26	0	0
9_5fc10f223012d-C13.tif	9	27	0	0
9_5fc10f223012d-C13.tif	9	28	0	0
9_5fc10f223012d-C13.tif	9	29	0	0
9_5fc10f223012d-C13.tif	9	30	0	0
9_5fc10f223012d-C13.tif	9	31	0	22
9_5fc10f223012d-C13.tif	9	32	201	0
9_5fc10f223012d-C13.tif	9	33	0	0
9_5fc10f223012d-C13.tif	9	34	0	0
9_5fc10f223012d-C13.tif	9	35	0	0
9_5fc10f223012d-C13.tif	9	36	0	0
9_5fc10f223012d-C13.tif	9	37	0	0
9_5fc10f223012d-C13.tif	9	38	0	0
9_5fc10f223012d-C13.tif	9	39	0	0
9_5fc10f223012d-C13.tif	9	40	0	0
9_5fc10f223012d-C13.tif	9	41	0	0
