# Supplementary material for: Topological stress triggers persistent DNA lesions in ribosomal DNA with ensuing formation of PML-nucleolar compartment
Source: eLife. 2024 Oct 10;12:RP91304. doi: 10.7554/eLife.91304 (PMC11466457; doi:10.7554/eLife.91304)
Supplement: Figure 3—source data 1. [file elife-91304-fig3-data1.xlsx]

## Sheet: Figure 3C
PML x DJ_colocalization								PML x rDNA_colocalization
ctrl	2d doxo+ PNAS	2d doxo no PNAS	1d R PML NDS	1d R no PNAs	4d R PML NDS	4d R no PNAs		ctrl	2d doxo+ PNAS	2d doxo no PNAS	1d R PML NDS	1d R no PNAs	4d R PML NDS	4d R no PNAs
0	0.1106	0.0015	0	0	0.0119	0		0	0.0152	0	0.0266	0.0037	0.0016	0.0024
0	0.0651	0	0	0.0149	0.069	0		0	0.0294	0	0	0.0621	0.0158	0.004
0.0012	0.0044	0	0.0219	0	0.0279	0.0125		0.0053	0	0	0.0214	0.0436	0.0045	0.0742
0	0.079	0	0.038	0	0	0.0063		0	0.0758	0.0015	0.0012	0	0.0106	0
0	0.0924	0	0.0095	0.0385	0.0007	0.0011		0	0.0013	0	0.0048	0.0109	0.0084	0
0	0	0.0024	0	0	0.0207	0		0.0029	0.0527	0.012	0	0	0.084	0.042
0	0.1296	0	0	0.0106	0	0.0066		0.0117	0.0436	0	0.0112	0.0134	0	0.0055
0	0.1005	0	0.2233	0.0226	0.0409	0		0	0.0605	0	0.0279	0	0.0819	0.0018
0	0	0.0296	0.1113	0	0.0107	0.0588		0	0.0237	0.019	0.0009	0	0.0004	0.0394
0	0	0	0.0672	0.0152	0	0		0	0	0.0304	0.0164	0	0	0
0	0.2336	0	0.0055	0.0058	0	0.0046		0	0.0678	0	0	0	0.008	0.0034
0	0	0	0.0252	0.0077	0.012	0.0003		0	0	0	0.0032	0.0067	0.0037	0
0	0.0238	0	0.0009	0	0.0054	0		0	0.028	0	0.0019	0	0.0162	0
0	0	0.0086	0	0.02	0.0022	0		0.0067	0	0.0436	0	0	0.0192	0
0	0.2013	0	0	0	0	0		0	0.1631	0	0.0192	0	0.0005	0.0259
0	0.0085	0	0	0.0119	0	0		0	0	0	0.0295	0.0425	0.0114	0
0.0076	0	0	0.0262	0.0083	0	0.056		0.0025	0.0227	0	0	0	0	0.0479
0	0.0938	0	0.0158	0	0.0025	0		0	0.0252	0.0851	0	0.0014	0	0.0004
0	0.0458		0	0.0016	0.0214	0.0239		0	0.1413		0	0.0088	0.0166	0.039
0.0179	0.0237		0.0073	0	0.0058	0.0038		0.0026	0.0368		0.0205	0	0.0088	0.0081
0	0.0144		0.0016		0.0002	0.0045		0	0.0004		0.0315		0	0
0	0.0231		0.0021			0.0001		0.0018	0		0			0
0	0.064		0			0		0.0022	0.0327		0			0.0084
0	0.1408		0					0.0002	0		0.0692
0	0		0.0842					0	0.0575		0
0.0146	0.0126		0.0329					0.0032	0.0287		0
	0		0.0396						0		0.1162
	0.0945		0						0.0162		0.0015
			0.0014								0.0841
			0.0025								0.0241
			0								0
			0.0084								0.0734
			0.0719								0.1034
			0								0.0331
			0.008								0.0152
			0.1157								0.0396
			0								0.0117
			0								0.0054

## Sheet: Figure 3D
53BP1 x DJ_colocalization								53BP1 x rDNA_colocalization
	ctrl	2d doxo+ PNAS	2d doxo no PNAS	1d Recovery + PML NDS	1d Recovery no PNAs	4d Recovery + PML NDS	4d Recovery no PNAs		ctrl	2d doxo+ PNAS	2d doxo no PNAS	1d R PML NDS	1d R no PMAs	4d R PML NDS	4d R no PNAs
	0	0.0106	0.023	0	0.0625	0	0		0	0	0.0223	0	0	0	0
	0	0.0444	0	0	0	0	0.0325		0	0.0007	0.0055	0.0191	0.0062	0	0.03
	0	0	0	0.0285	0	0.0016	0		0	0	0	0.0007	0.0016	0.0015	0
	0	0.0979	0.0008	0	0.0134	0	0		0	0.0955	0.0078	0	0	0.0301	0
	0	0.0008	0	0	0	0.0039	0		0	0	0.0094	0	0	0.0071	0
	0	0	0.0032	0	0.0019	0	0.0208		0.0065	0.0065	0.0058	0	0	0	0
	0	0.0145	0.0184	0.0469	0	0	0		0	0.0009	0.0056	0.0158	0	0.0003	0
	0	0.0312	0.0108	0.0045	0	0	0		0	0.0238	0	0	0	0.0096	0
	0	0.0027	0.0314	0	0	0	0		0.0073	0.0086	0.0113	0	0	0	0
	0	0.0111	0.0026	0.009	0.0141	0.0132	0		0	0.0136	0.0284	0	0	0.0179	0
	0	0.0586	0	0.0003	0.0021	0	0		0	0.0031	0.0424	0	0.0002	0.015	0
	0	0	0	0	0	0.0394	0		0	0	0	0	0.001	0	0
	0	0.0004	0.0148	0.0168	0.0214	0.0418	0		0	0.01	0	0.0025	0	0.0029	0
	0	0	0	0	0.0114	0	0.0013		0.0015	0	0	0	0	0	0.0008
	0	0.017	0.0313	0	0.0245	0.0196	0		0	0.0277	0.0229	0.0136	0	0.0103	0
	0	0.0373	0.0024	0	0.007	0	0.0011		0	0	0.0035	0.0167	0.011	0	0
	0	0.0103	0	0.0204	0	0	0		0	0.0337	0	0.0175	0	0	0
	0	0.0159	0	0.0005	0.0183	0.0126	0.0045		0	0	0	0	0	0	0
	0	0.1213		0.0014	0	0	0		0	0.0686		0.0098	0.0122	0	0
	0	0		0		0.0079	0.0053		0	0.0177		0	0	0.0229	0.007
	0	0		0.0024		0	0.0277		0	0		0.0091		0.0006	0.012
	0	0.001		0			0.0147		0	0		0			0.0176
	0.0291	0.0326		0			0		0.0055	0.0207		0			0.012
	0	0.0101		0					0	0		0.0505
	0.0035	0		0					0	0.0195		0
	0.0188	0.0422		0					0.0057	0.0206		0.0088
		0		0						0		0
		0.0272		0						0.0244		0
				0								0.0005
				0								0
				0.0539								0
				0								0.0083
				0.0352								0.0009
				0								0
				0.0146								0.0071
				0								0.0037
				0.1134								0
				0								0.0014

## Sheet: Figure 3F
		% of PNAs with rDNA/DJ (+DSB) colocalization
		DJ/rDNA damaged	DJ/rDNA no damage	no DJ/rDNA
	2 days doxo	71	18	11
	1 day recovery	37	47	16
	4 days recovery	23	50	27
