# Supplementary material for: Topological stress triggers persistent DNA lesions in ribosomal DNA with ensuing formation of PML-nucleolar compartment
Source: eLife. 2024 Oct 10;12:RP91304. doi: 10.7554/eLife.91304 (PMC11466457; doi:10.7554/eLife.91304)
Supplement: Figure 4—figure supplement 2—source data 1. [file elife-91304-fig4-figsupp2-data1.xlsx]

## Sheet: Fig.4_FS2-E_24 h I-PpoI
nucleolus 1					nucleolus 2					nucleolus 3					nucleolus 4					nucleolus 5
	R	G				R	G				R	G				R	G				R	G
0	232	40	20		0	146	0	0		0	452	0	0		0	644	0	0		0	354	8	4
0.02916	334.689	21.938	10.969		0.02916	167.952	0	0		0.02916	497.424	0	0		0.02916	653.733	0	0		0.02916	318.192	9.968	4.984
0.05832	510.601	6	3		0.05832	199.071	0	0		0.05832	564.855	0	0		0.05832	664.711	0	0		0.05832	287.981	8.25	4.125
0.08748	745.503	0	0		0.08748	240.386	0	0		0.08748	658.601	0	0		0.08748	670.575	0	0		0.08748	262.202	5.734	2.867
0.11664	1012.41	0	0		0.11664	292.732	0	0		0.11664	782.98	0	0		0.11664	665.393	0	0		0.11664	240.588	3.278	1.639
0.1458	1264.97	0	0		0.1458	355.918	0	0		0.1458	936.617	2.37	0.948		0.1458	651.462	0	0		0.1458	224.645	2	1
0.17496	1452.22	0	0		0.17496	426.171	0	0		0.17496	1114.71	4.845	1.938		0.17496	622.042	0	0		0.17496	215.659	1.516	0.758
0.20412	1541.75	0	0		0.20412	501.065	0	0		0.20412	1305.67	7.435	2.974		0.20412	587.401	0	0		0.20412	214.622	0	0
0.23328	1530.07	0	0		0.23328	579.007	0	0		0.23328	1492.77	5.695	2.278		0.23328	551.852	0	0		0.23328	223.885	0	0
0.26244	1442.55	0	0		0.26244	655.778	0	0		0.26244	1663.67	3.595	1.438		0.26244	518.641	0	0		0.26244	242.057	0	0
0.2916	1318.54	0	0		0.2916	731.146	0	0		0.2916	1807.13	1.495	0.598		0.2916	494.307	0	0		0.2916	267.503	0	0
0.32076	1195.38	0	0		0.32076	802.857	0	0		0.32076	1911.24	0.1825	0.073		0.32076	477.553	0	0		0.32076	293.863	0	0
0.34992	1056.13	0	0		0.34992	869.324	0	0		0.34992	1966.69	0	0		0.34992	468.56	0	0		0.34992	317.401	0	0
0.37908	916.808	0	0		0.37908	929.506	0	0		0.37908	1963.09	0	0		0.37908	463.847	0	0		0.37908	331.694	0	0
0.40824	822.306	0	0		0.40824	979.994	0	0		0.40824	1891.97	0	0		0.40824	462.437	0	0		0.40824	335.886	0.27	0.135
0.4374	753.098	0	0		0.4374	1009.84	0	0		0.4374	1762.56	0	0		0.4374	461.478	0	0		0.4374	331.654	1.454	0.727
0.46656	704.238	0	0		0.46656	1023.11	0	0		0.46656	1597.16	0.8175	0.327		0.46656	462.031	0	0		0.46656	322.443	3.146	1.573
0.49572	671.586	0	0		0.49572	1017.13	0	0		0.49572	1416.74	1.3525	0.541		0.49572	461.255	0	0		0.49572	312.883	6.79	3.395
0.52487	647.839	0	0		0.52487	984.91	0	0		0.52487	1241.65	0.95	0.38		0.52487	456.558	0	0		0.52487	305.632	9.078	4.539
0.55403	631.933	0	0		0.55403	937.116	0	0		0.55403	1087.11	2.0875	0.835		0.55403	444.99	0	0		0.55403	303.415	11.634	5.817
0.58319	627.202	0	0		0.58319	884.137	0	0		0.58319	959.285	2.5	1		0.58319	421.885	0	0		0.58319	306.356	11.042	5.521
0.61235	610.409	0	0		0.61235	832.08	0	0		0.61235	860.397	4.46	1.784		0.61235	387.463	0	0		0.61235	310.824	9.664	4.832
0.64151	577.238	0	0		0.64151	780.988	0	0		0.64151	787.761	8.05	3.22		0.64151	343.021	0	0		0.64151	316.593	7.548	3.774
0.67067	530.71	0	0		0.67067	738.588	0	0		0.67067	736.663	15.1775	6.071		0.67067	294.901	0	0		0.67067	319.507	5.524	2.762
0.69983	475.15	0	0		0.69983	706.817	0	0		0.69983	698.968	22.47	8.988		0.69983	253.204	0	0		0.69983	320.232	3.634	1.817
0.72899	413.948	0	0		0.72899	684.12	0	0		0.72899	666.824	26.0575	10.423		0.72899	220.31	0	0		0.72899	317.739	1.71	0.855
0.75815	352.342	0	0		0.75815	671.331	0	0		0.75815	632.237	24.64	9.856		0.75815	200.802	0	0		0.75815	312.091	0	0
0.78731	293.544	0	0		0.78731	668.105	0	0		0.78731	591.084	20.0375	8.015		0.78731	196.386	0	0		0.78731	304.878	0	0
0.81647	240.212	0	0		0.81647	671.126	0	0		0.81647	543.45	15.6025	6.241		0.81647	206.719	0	0		0.81647	296.849	0	0
0.84563	194.394	0	0		0.84563	679.742	0	0		0.84563	490.884	10.92	4.368		0.84563	243.024	0	0		0.84563	287.168	0	0
0.87479	157.736	0	0		0.87479	690.158	0	0		0.87479	437.27	7.36	2.944		0.87479	307.818	0	0		0.87479	285.324	0	0
0.90395	130.591	0	0		0.90395	701.781	0	0		0.90395	389.173	4.885	1.954		0.90395	417.09	0	0		0.90395	285.65	0	0
0.93311	113.01	0	0		0.93311	710.088	0	0		0.93311	350.51	3.145	1.258		0.93311	589.746	0	0		0.93311	299.862	0	0
0.96227	105.461	0	0		0.96227	719.482	0	0		0.96227	322.093	2.5	1		0.96227	831.385	0	0		0.96227	325.606	0	0
0.99143	106.943	0	0		0.99143	731.268	0	0		0.99143	303.814	2.5	1		0.99143	1150.21	0	0		0.99143	370.752	0	0
1.02059	118.368	0	0		1.02059	742.285	0	0		1.02059	292.635	2.5	1		1.02059	1517.94	0	0		1.02059	437.229	0	0
1.04975	137.762	0	0		1.04975	748.082	0	0		1.04975	283.449	2.5	1		1.04975	1890.61	0	0		1.04975	524.698	0	0
1.07891	163.699	0	0		1.07891	750.989	0	0		1.07891	272.624	4.0475	1.619		1.07891	2203.08	0	0		1.07891	641.129	0	0
1.10807	192.456	0	0		1.10807	747.263	0	0		1.10807	258.887	5.485	2.194		1.10807	2419.59	0	0		1.10807	775.021	0	0
1.13723	219.756	0	0		1.13723	729.787	0	0		1.13723	243.18	6.92	2.768		1.13723	2509.99	0	0		1.13723	924.94	0	0
1.16639	240.404	0	0		1.16639	703.443	0	0		1.16639	226.507	9.02	3.608		1.16639	2491.74	0	0		1.16639	1067.42	0	0
1.19555	251.627	0	0		1.19555	667.832	0	0		1.19555	212.341	9.6775	3.871		1.19555	2391.61	0	0		1.19555	1196.34	0	0
1.22471	252.166	0	0		1.22471	622.422	0	0		1.22471	200.268	10.0925	4.037		1.22471	2232.89	0	0		1.22471	1291.86	0	0
1.25387	243.642	0	0		1.25387	569.015	0	0		1.25387	190.078	13.0575	5.223		1.25387	2052.64	0	0		1.25387	1346.76	0	0
1.28303	229.057	0	0		1.28303	507.082	0	0		1.28303	180.94	17.54	7.016		1.28303	1875.01	0	0		1.28303	1357.34	0	0
1.31219	208.409	0	0		1.31219	441.311	0	0		1.31219	171.604	22.4	8.96		1.31219	1716.15	0	0		1.31219	1331.42	0	0
1.34135	186.415	0	0		1.34135	375.673	0	0		1.34135	162.406	25.9525	10.381		1.34135	1584.04	0	0		1.34135	1284.14	0	0
1.37051	163.389	0	0		1.37051	316.258	0	0		1.37051	153.504	25.435	10.174		1.37051	1482.61	0	0		1.37051	1228.62	0	0
1.39967	142.078	0	0		1.39967	268.146	0	0		1.39967	145.857	22.155	8.862		1.39967	1400.51	0	0		1.39967	1187.93	0	0
1.42883	123.767	0	0		1.42883	235.311	0	0		1.42883	139.619	16.6575	6.663		1.42883	1329.69	0	0		1.42883	1161.72	0	0
1.45799	109.679	0	0		1.45799	218.033	0	0		1.45799	134.605	11.9	4.76		1.45799	1258.03	0	0		1.45799	1162.17	0	0
1.48715	100.352	0	0		1.48715	214.854	0	0		1.48715	130.125	8.815	3.526		1.48715	1176.48	0	0		1.48715	1178.48	0	0
1.5163	96.218	0	0		1.5163	223.508	0	0		1.5163	126.767	7.5	3		1.5163	1086.68	0	0		1.5163	1213.38	0	0
1.54546	97.052	0	0		1.54546	245.692	0	0		1.54546	124.358	6.4525	2.581		1.54546	990.979	0	0		1.54546	1258.3	0	0
1.57462	101.176	0	0		1.57462	275.04	0	0		1.57462	123.842	5	2		1.57462	897.385	0	0		1.57462	1307.9	0	0
1.60378	109.062	0	0		1.60378	307.627	0	0		1.60378	126.324	5	2		1.60378	815.006	0	0		1.60378	1360.58	0	0
1.63294	118.016	0	0		1.63294	342.174	0	0		1.63294	130.503	5	2		1.63294	747.255	0	0		1.63294	1409.4	0	0
1.6621	127.99	0	0		1.6621	372.163	0	0		1.6621	136.729	4.4625	1.785		1.6621	699.233	0	0		1.6621	1457.07	0	0
1.69126	140.642	0	0		1.69126	387.936	0	0		1.69126	145.772	3.325	1.33		1.69126	669.124	0	0		1.69126	1499.01	0	0
1.72042	158.233	0	0		1.72042	386.138	0	0		1.72042	157.441	2.775	1.11		1.72042	656.371	0	0		1.72042	1529.99	0	0
1.74958	181.964	0	0		1.74958	368.761	0	0		1.74958	172.863	1.575	0.63		1.74958	659.608	0	0		1.74958	1549.61	0	0
1.77874	215.642	0	0		1.77874	339.736	0	0		1.77874	191.681	0	0		1.77874	675.835	0	0		1.77874	1549.49	0	0
1.8079	263.285	0	0		1.8079	308.149	0	0		1.8079	212.709	0	0		1.8079	700.606	0	0		1.8079	1528.36	0	0
1.83706	327.762	0	0		1.83706	281.322	0	0		1.83706	232.648	0	0		1.83706	730.217	0	0		1.83706	1478.84	0	0
1.86622	417.601	0	0		1.86622	264.085	0	0		1.86622	249.515	0	0		1.86622	758.516	0	0		1.86622	1400.56	0	0
1.89538	532.736	0	0		1.89538	258.402	0	0		1.89538	260.977	0	0		1.89538	779.572	0	0		1.89538	1296.33	0	0
1.92454	663.166	0	0		1.92454	264.892	0	0		1.92454	265.884	0	0		1.92454	791.788	0	0		1.92454	1172.01	0	0
1.9537	798.036	0	0		1.9537	283.529	0	0		1.9537	266.172	0	0		1.9537	791.531	0	0		1.9537	1048.16	0	0
1.98286	927.798	0	0		1.98286	312.15	0	0		1.98286	263.9	0	0		1.98286	782.301	0	0		1.98286	924.757	0	0
2.01202	1043.23	0	0		2.01202	349.457	0.0325	0.013		2.01202	261.603	0.495	0.198		2.01202	769.655	0	0		2.01202	820.418	0	0
2.04118	1142.82	0	0		2.04118	391.195	0	0		2.04118	259.478	1.6625	0.665		2.04118	758.035	0	0		2.04118	729.951	0	0
2.07034	1225.91	0	0		2.07034	433.719	0.09	0.036		2.07034	258.665	3.0175	1.207		2.07034	753.936	0	0		2.07034	659.5	0	0
2.0995	1292.72	0	0		2.0995	473.743	0.525	0.21		2.0995	258.957	5.925	2.37		2.0995	761.685	0	0		2.0995	603.714	0	0
2.12866	1344.24	0	0		2.12866	506.409	0	0		2.12866	259.617	14.185	5.674		2.12866	781.978	0	0		2.12866	559.062	0	0
2.15782	1374.39	0	0		2.15782	531.21	0	0		2.15782	262.415	25.92	10.368		2.15782	812.881	0	0		2.15782	522.243	0	0
2.18698	1379.49	0	0		2.18698	550.72	0	0		2.18698	267.501	38.7775	15.511		2.18698	852.804	0	0		2.18698	490.924	0	0
2.21614	1352.16	0	0		2.21614	562.489	0	0		2.21614	278.108	42.9375	17.175		2.21614	895.457	0	0		2.21614	461.17	0	0
2.2453	1290.4	0	0		2.2453	567.903	0	0		2.2453	296.025	35.4425	14.177		2.2453	936.347	0	0		2.2453	436.536	0	0
2.27446	1198.23	0	0		2.27446	569.745	0	0		2.27446	322.564	23.675	9.47		2.27446	974.176	0	0		2.27446	415.353	0	0
2.30362	1088.68	0	0		2.30362	568.998	0	0		2.30362	358.824	13.97	5.588		2.30362	1008.16	0	0		2.30362	404.856	0	0
2.33278	979.446	0	0		2.33278	565.706	0	0		2.33278	403.69	5.125	2.05		2.33278	1038.06	0	0		2.33278	400.73	0	0
2.36194	887.549	0	0		2.36194	560.974	0	0		2.36194	455.178	1.8625	0.745		2.36194	1066.37	0	0		2.36194	408.789	0	0
2.3911	824.767	0	0		2.3911	552.292	0	0		2.3911	510.421	0	0		2.3911	1094.79	0	0		2.3911	424.954	0	0
2.42026	795.062	0	0		2.42026	538.931	0	0		2.42026	565.682	0	0		2.42026	1123.01	0	0		2.42026	449.211	0	0
2.44942	799.751	0	0		2.44942	522.582	0	0		2.44942	620.562	0	0		2.44942	1148.22	0	0		2.44942	478.732	0	0
2.47858	833.57	0	0		2.47858	504.577	0	0		2.47858	673.866	0	0		2.47858	1166.77	0	0		2.47858	508.767	0	0
2.50774	889.684	2	1		2.50774	486.283	0	0		2.50774	726.259	0	0		2.50774	1169.19	0	0		2.50774	535.598	0	0
2.53689	957	8	4		2.53689	469.848	0	0		2.53689	774.617	0	0		2.53689	1153.22	0	0		2.53689	558.642	0	0
2.56605	1020.06	18.528	9.264		2.56605	456.775	0	0		2.56605	819.62	0	0		2.56605	1120.08	0	0		2.56605	576.223	0	0
2.59521	1069.03	26.932	13.466		2.59521	445.622	0	0		2.59521	852.641	0	0		2.59521	1077.27	0	0		2.59521	591.727	0	0
2.62437	1078.85	28.414	14.207		2.62437	436.862	0	0		2.62437	871.678	0	0		2.62437	1033.27	0	0		2.62437	607.32	0	0
2.65353	1033.79	23.368	11.684		2.65353	431.493	0	0		2.65353	875.705	0	0		2.65353	1001.22	0	0		2.65353	626.19	0	0
2.68269	940.907	12.84	6.42		2.68269	421.656	0	0		2.68269	867.459	0	0		2.68269	990.144	0	0		2.68269	650.332	0	0
2.71185	826.047	5.326	2.663		2.71185	404.84	0	0		2.71185	854.359	0	0		2.71185	999.885	0	0		2.71185	680.818	0	0
2.74101	721.865	1.078	0.539		2.74101	380.029	0	0		2.74101	843.229	0	0		2.74101	1034.77	0	0		2.74101	713.577	0	0
2.77017	641.409	0	0		2.77017	348.28	0	0		2.77017	841.988	0	0		2.77017	1084.61	0	0		2.77017	745.125	0	0
2.79933	596.725	0	0		2.79933	313.757	0	0		2.79933	853.373	0	0		2.79933	1140.54	0	0		2.79933	771.301	0	0
2.82849	590.845	0	0		2.82849	280	0	0		2.82849	883	0	0		2.82849	1197	0	0		2.82849	790.25	0	0
2.85765	625.244	0	0		2.85765	252.002	0	0		2.85765	937.012	0	0		2.85765	1227.17	0	0		2.85765	800.989	0	0
2.88681	694.383	0	0		2.88681	230.3	0	0		2.88681	1017.78	0	0		2.88681	1241.34	0	0		2.88681	806.614	0	0
2.91597	788.109	0	0		2.91597	213.829	0	0		2.91597	1127.1	0	0		2.91597	1237.31	0	0		2.91597	811.129	0	0
2.94513	889.28	0	0		2.94513	204.186	0	0		2.94513	1264.62	0	0		2.94513	1222.41	0	0		2.94513	819.06	0	0
2.97429	977.414	0	0		2.97429	199.28	0	0		2.97429	1421.48	0	0		2.97429	1212.67	0	0		2.97429	833.638	0	0
3.00345	1033.19	0	0		3.00345	196.498	0	0		3.00345	1579.48	0	0		3.00345	1211.84	0	0		3.00345	855.322	0	0
3.03261	1048.97	0	0		3.03261	195.648	0	0		3.03261	1713.3	0	0		3.03261	1227.18	0	0		3.03261	882.33	0	0
3.06177	1028.08	0	0		3.06177	197.311	0	0		3.06177	1794.64	0	0		3.06177	1258.13	0	0		3.06177	909.869	0	0
3.09093	983.674	2	1		3.09093	200.335	0	0		3.09093	1804.86	0	0		3.09093	1296.45	0	0		3.09093	939.684	0	0
3.12009	929.87	2.674	1.337		3.12009	204.727	0	0		3.12009	1743.98	15.66	6.264		3.12009	1337.01	0	0		3.12009	966.854	0	0
3.14925	878.632	4.642	2.321		3.14925	212.209	0	0		3.14925	1631.21	301.745	120.698		3.14925	1368.68	0	0		3.14925	1000.92	0	0
3.17841	836.591	6	3		3.17841	224.113	0	0		3.17841	1498.27	1194.61	477.845		3.17841	1385.46	0	0		3.17841	1038.71	0	0
3.20757	806.026	4	2		3.20757	240.526	0	0		3.20757	1373.04	2629.91	1051.96		3.20757	1382.58	0	0		3.20757	1090.73	0	0
3.23673	785.041	3.45	1.725		3.23673	261.268	0	0		3.23673	1273.68	4024.17	1609.67		3.23673	1356.73	0	0		3.23673	1156.43	0	0
3.26589	768.777	2	1		3.26589	285.144	0	0		3.26589	1207.7	4832.47	1932.99		3.26589	1311.45	0	0		3.26589	1237.39	0	0
3.29505	752.104	0	0		3.29505	307.919	0	0		3.29505	1172.56	5026.84	2010.74		3.29505	1243.02	0	0		3.29505	1327.66	0	0
3.32421	730.161	0	0		3.32421	325.495	0	0		3.32421	1159.71	4719.83	1887.93		3.32421	1150.54	0	0		3.32421	1417.12	0	0
3.35337	701.29	0	0		3.35337	335.018	0	0		3.35337	1153.61	4092.62	1637.05		3.35337	1038.26	0	0		3.35337	1495.93	0	0
3.38253	666.549	0	0		3.38253	333.944	0	0		3.38253	1140.91	3367.48	1346.99		3.38253	909.096	0	0		3.38253	1554.67	0	0
3.41169	631.751	0	0		3.41169	322.084	0	0		3.41169	1109.07	2709.14	1083.66		3.41169	776.626	0	0		3.41169	1589.82	0	0
3.44085	600.212	0.332	0.166		3.44085	301.555	0	0		3.44085	1055.12	2213.54	885.415		3.44085	653.729	0	0		3.44085	1604.08	0	0
3.47001	576.886	0.3	0.15		3.47001	280.96	0	0		3.47001	984.698	1803.38	721.352		3.47001	549.441	0	0		3.47001	1605.98	0	0
3.49917	562.321	2.27	1.135		3.49917	259.346	0	0		3.49917	910.523	1383.33	553.332		3.49917	471.021	6.445	2.578		3.49917	1604.95	0	0
3.52832	553.731	2.238	1.119		3.52832	240.28	0	0		3.52832	847.157	960.793	384.317		3.52832	423.087	68.105	27.242		3.52832	1611.44	0	0
3.55748	546.368	2.208	1.104		3.55748	228.701	0	0		3.55748	805.826	594.52	237.808		3.55748	406.896	285.697	114.279		3.55748	1627.88	0	0
3.58664	535.187	2	1		3.58664	222.676	0	0		3.58664	793.354	324.83	129.932		3.58664	425.833	725.125	290.05		3.58664	1654.53	0	0
3.6158	527.212	0	0		3.6158	222.667	0	0		3.6158	812.373	155.567	62.227		3.6158	486.994	1301.43	520.571		3.6158	1692.48	0	0
3.64496	512.466	0	0		3.64496	226.187	0	0		3.64496	863.57	61.25	24.5		3.64496	601.475	1825.61	730.244		3.64496	1737.47	0	0
3.67412	490.762	0	0		3.67412	233.591	0	0		3.67412	944.57	15.915	6.366		3.67412	787.897	2114.17	845.667		3.67412	1792.24	0	0
3.70328	463.938	0	0		3.70328	239.611	0	0		3.70328	1051.05	0.61	0.244		3.70328	1058.61	2170.82	868.327		3.70328	1856.62	0	0
3.73244	436.71	0	0		3.73244	239.151	0	0		3.73244	1179.47	0	0		3.73244	1419.95	2061.35	824.539		3.73244	1936.23	0	0
3.7616	409.036	0	0		3.7616	232.805	0	0		3.7616	1317.95	0	0		3.7616	1852.43	1877.42	750.967		3.7616	2034.8	0	0
3.79076	380.855	0	0		3.79076	220.095	0	0		3.79076	1455.24	0	0		3.79076	2308.42	1664.74	665.896		3.79076	2158.61	0	0
3.81992	351.347	0	0		3.81992	203.534	0	0		3.81992	1579.75	0	0		3.81992	2716.79	1396.84	558.736		3.81992	2299.38	0	0
3.84908	320.653	0	0		3.84908	187.901	0	0		3.84908	1681.88	0	0		3.84908	3007.8	1087.39	434.956		3.84908	2437.43	0	0
3.87824	287.181	0	0		3.87824	175.598	0	0		3.87824	1756.42	0	0		3.87824	3138.48	751.952	300.781		3.87824	2558.29	0	0
3.9074	252.927	0	0		3.9074	166.719	0	0		3.9074	1802.88	0.1425	0.057		3.9074	3103.51	429.09	171.636		3.9074	2656.86	0	0
3.93656	218.13	0	0		3.93656	162.103	0	0		3.93656	1828.18	0.805	0.322		3.93656	2948.38	177.71	71.084		3.93656	2705.15	0	0
3.96572	187.518	0	0		3.96572	163.979	0	0		3.96572	1840.02	0.3325	0.133		3.96572	2735.99	24.495	9.798		3.96572	2715.08	0	0
3.99488	164.705	1.036	0.518		3.99488	170.661	0	0		3.99488	1847.06	0	0		3.99488	2505.6	0	0		3.99488	2650.91	0	0
4.02404	147.984	8.094	4.047		4.02404	183.002	0	0		4.02404	1855.92	0	0		4.02404	2282.45	0	0		4.02404	2551.15	0	0
4.0532	139.358	36.134	18.067		4.0532	204.094	0	0		4.0532	1870.91	0	0		4.0532	2089.56	0	0		4.0532	2402.35	2.556	1.278
4.08236	142.648	91.948	45.974		4.08236	238.077	0	0		4.08236	1894.19	0	0		4.08236	1917.85	0	0		4.08236	2250.16	44.596	22.298
4.11152	161.383	212.28	106.14		4.11152	286.034	0	0		4.11152	1927.92	0	0		4.11152	1773.98	0	0		4.11152	2117.32	212.616	106.308
4.14068	204.036	468.042	234.021		4.14068	351	0	0		4.14068	1975.02	0	0		4.14068	1652.93	0	0		4.14068	2022.71	720.198	360.099
4.16984	293.782	949.306	474.653		4.16984	436.923	0	0		4.16984	2036.96	0	0		4.16984	1550.58	0	0		4.16984	1978.19	1680.51	840.256
4.199	440.622	1694.24	847.119		4.199	540.346	0	0		4.199	2115.45	0	0		4.199	1471.9	0	0		4.199	1981.66	2578.35	1289.17
4.22816	660.316	2593.96	1296.98		4.22816	656.996	0	0		4.22816	2211.09	0	0		4.22816	1412.13	0	0		4.22816	2038.17	3077.25	1538.63
4.25732	963.466	3127.44	1563.72		4.25732	779.602	0	0		4.25732	2321.81	0	0		4.25732	1372.26	0	0		4.25732	2138.92	3017.44	1508.72
4.28648	1340.55	3031.39	1515.69		4.28648	903.798	0	0		4.28648	2444.12	0	0		4.28648	1349.24	0	0		4.28648	2274.33	2693.48	1346.74
4.31564	1758.52	2343.53	1171.77		4.31564	1026.39	80.5825	32.233		4.31564	2575.53	0	0		4.31564	1336.08	0	0		4.31564	2421.51	2134.65	1067.33
4.3448	2199.33	1400.55	700.275		4.3448	1150.34	718.273	287.309		4.3448	2711.5	0	0		4.3448	1327.98	0	0		4.3448	2542.15	1573.55	786.774
4.37396	2627.62	770.612	385.306		4.37396	1282.08	1926.45	770.582		4.37396	2848.2	0	0		4.37396	1314.49	0	0		4.37396	2627.93	1151.75	575.874
4.40312	2931.69	397.638	198.819		4.40312	1433.49	2881.21	1152.48		4.40312	2980.44	0	0		4.40312	1291.46	0	0		4.40312	2673.58	854.998	427.499
4.43228	3076.12	197.078	98.539		4.43228	1614.01	3003.84	1201.54		4.43228	3100.93	5.4125	2.165		4.43228	1255.65	0	0		4.43228	2680.52	658.198	329.099
4.46144	3060.93	94.27	47.135		4.46144	1826.32	2322.35	928.939		4.46144	3201.65	34.8275	13.931		4.46144	1205.58	0	0		4.46144	2656.89	524.448	262.224
4.4906	2913.56	42.788	21.394		4.4906	2066.43	1340.71	536.284		4.4906	3277.72	98.175	39.27		4.4906	1148.65	0	0		4.4906	2597.15	431.236	215.618
4.51975	2678.57	14	7		4.51975	2340.15	569.888	227.955		4.51975	3331.76	183.787	73.515		4.51975	1090.8	0	0		4.51975	2510.66	359.33	179.665
4.54891	2402.74	0	0		4.54891	2629.41	165.832	66.333		4.54891	3374.52	273.56	109.424		4.54891	1044.19	0	0		4.54891	2386.62	299.652	149.826
4.57807	2137.59	0	0		4.57807	2887.36	26.7925	10.717		4.57807	3422.35	347.473	138.989		4.57807	1020.42	0	0		4.57807	2240.42	254.946	127.473
4.60723	1917.57	0	0		4.60723	3079.43	0	0		4.60723	3491.9	383.533	153.413		4.60723	1027.62	0	0		4.60723	2094.05	222.306	111.153
4.63639	1746.85	0	0		4.63639	3184.67	0	0		4.63639	3594.61	365.98	146.392		4.63639	1081.69	0	0		4.63639	1969.92	203.666	101.833
4.66555	1660.41	0	0		4.66555	3202.58	0	0		4.66555	3732.42	298.252	119.301		4.66555	1184.98	0	0		4.66555	1863.77	197.086	98.543
4.69471	1657.52	0	0		4.69471	3155.24	0	0		4.69471	3893.75	208.065	83.226		4.69471	1341.91	0	0		4.69471	1778.52	195.322	97.661
4.72387	1678.93	0	0		4.72387	3066.65	0	0		4.72387	4061.02	127.078	50.831		4.72387	1560.34	0	0		4.72387	1717.19	190.692	95.346
4.75303	1692.33	0	0		4.75303	2969.07	0	0		4.75303	4222.03	70.425	28.17		4.75303	1831.91	0	0		4.75303	1676.26	175.248	87.624
4.78219	1698.13	0	0		4.78219	2880.41	0	0		4.78219	4368.57	39.87	15.948		4.78219	2148.63	0	0		4.78219	1655.28	143.452	71.726
4.81135	1699.94	0	0		4.81135	2806.79	0	0		4.81135	4487.23	30.445	12.178		4.81135	2492.29	0	0		4.81135	1647.88	103.632	51.816
4.84051	1706.38	0	0		4.84051	2752.77	0	0		4.84051	4581.14	39.2625	15.705		4.84051	2843.82	0	0		4.84051	1652.2	68.288	34.144
4.86967	1728.52	0	0		4.86967	2725.76	0	0		4.86967	4661.3	69.7825	27.913		4.86967	3165.01	0	0		4.86967	1662.64	43.278	21.639
4.89883	1827.57	0	0		4.89883	2721.97	0	0		4.89883	4735.24	144.488	57.795		4.89883	3443.15	6.8675	2.747		4.89883	1676.34	29.008	14.504
4.92799	2043.3	0	0		4.92799	2746.45	0	0		4.92799	4814.16	288.278	115.311		4.92799	3653.45	66.135	26.454		4.92799	1692.31	23.99	11.995
4.95715	2318.85	0	0		4.95715	2804.14	0	0		4.95715	4889.27	541.358	216.543		4.95715	3782.59	171.287	68.515		4.95715	1712.01	23.882	11.941
4.98631	2631.98	0	0		4.98631	2903.89	0	0		4.98631	4940.16	951.025	380.41		4.98631	3843.93	231.69	92.676		4.98631	1737.59	26.74	13.37
5.01547	2927.86	0	0		5.01547	3032.64	0	0		5.01547	4934.2	1539.74	615.896		5.01547	3875.74	225.763	90.305		5.01547	1772.84	30.27	15.135
5.04463	3156.18	0	0		5.04463	3182.62	0	0		5.04463	4824.05	2256.19	902.478		5.04463	3910.82	198.195	79.278		5.04463	1828.39	32.26	16.13
5.07379	3324.07	0	0		5.07379	3342.31	28.4625	11.385		5.07379	4582.98	2963.9	1185.56		5.07379	3980.19	181.895	72.758		5.07379	1901.09	32.886	16.443
5.10295	3353.52	1.44	0.72		5.10295	3491.58	173.585	69.434		5.10295	4216.18	3484.24	1393.7		5.10295	4098.08	198.56	79.424		5.10295	2018.44	33.906	16.953
5.13211	3150.72	11.358	5.679		5.13211	3618.4	433.315	173.326		5.13211	3760.51	3715.97	1486.39		5.13211	4254.27	261.725	104.69		5.13211	2178.99	39.878	19.939
5.16127	2722.51	82.59	41.295		5.16127	3670.5	792.002	316.801		5.16127	3284.86	3652.14	1460.85		5.16127	4420.88	389.41	155.764		5.16127	2398.78	60.894	30.447
5.19043	2191.96	244.166	122.083		5.19043	3578.43	1232.16	492.864		5.19043	2791.01	3365.86	1346.34		5.19043	4550.07	607.75	243.1		5.19043	2620.12	107.278	53.639
5.21959	1684.96	432.28	216.14		5.21959	3363.72	1774.7	709.881		5.21959	2319.86	2968.94	1187.58		5.21959	4583.98	948.175	379.27		5.21959	2833.46	201.962	100.981
5.24875	1224.87	488.166	244.083		5.24875	3040.08	2381.71	952.685		5.24875	1901.12	2598.2	1039.28		5.24875	4449.06	1454.79	581.917		5.24875	3017.44	399.414	199.707
5.27791	878.373	348.186	174.093		5.27791	2640.43	2834.16	1133.66		5.27791	1548.63	2365	945.999		5.27791	4100.98	2266.37	906.547		5.27791	3142.23	758.476	379.238
5.30707	623.803	148.716	74.358		5.30707	2201.88	2994.88	1197.95		5.30707	1266.07	2263.88	905.552		5.30707	3494	3338.51	1335.4		5.30707	3170.63	1306.65	653.324
5.33623	448.446	32.446	16.223		5.33623	1732.9	2776.76	1110.7		5.33623	1045.16	2245.12	898.048		5.33623	2748.03	4111.49	1644.6		5.33623	3064.35	2009.51	1004.75
5.36539	333.58	2	1		5.36539	1270.12	2121.62	848.649		5.36539	874.702	2237.99	895.196		5.36539	2021.75	4551.55	1820.62		5.36539	2796.6	2636.57	1318.28
5.39455	284.881	0	0		5.39455	865.096	1213.78	485.512		5.39455	743.435	2160.02	864.008		5.39455	1413.59	4394.97	1757.99		5.39455	2440.12	3039.4	1519.7
5.42371	255.259	0	0		5.42371	550.148	450.288	180.115		5.42371	639.292	1945.78	778.312		5.42371	954.269	3650.63	1460.25		5.42371	1999.99	3021.75	1510.88
5.45287	230.228	0	0		5.45287	332.487	62.8125	25.125		5.45287	554.136	1575.32	630.127		5.45287	646.643	2474.16	989.666		5.45287	1581.41	2694.87	1347.44
5.48203	203.446	0	0		5.48203	203.674	0	0		5.48203	481.263	1100.46	440.185		5.48203	455.913	1360.18	544.073		5.48203	1199.57	2066.88	1033.44
5.51119	172.819	0	0		5.51119	139.199	0	0		5.51119	415.403	626.577	250.631		5.51119	345.302	590.933	236.373		5.51119	890.991	1316.67	658.336
5.54034	141.301	0	0		5.54034	122.365	0	0		5.54034	356.479	267.88	107.152		5.54034	292.941	185.54	74.216		5.54034	663.001	689.402	344.701
5.5695	118.72	0	0		5.5695	143.059	0	0		5.5695	301.704	65.6625	26.265		5.5695	274.094	34.715	13.886		5.5695	509.084	298.536	149.268
5.59866	102.907	0	0		5.59866	205.12	0	0		5.59866	251.662	0	0		5.59866	279.828	0	0		5.59866	416.551	108.502	54.251
5.62782	92	0	0		5.62782	317.993	0	0		5.62782	207.971	0	0		5.62782	300.364	0	0		5.62782	369.393	44.018	22.009
5.65698	151	0			5.65698	498	0	0		5.65698	173	0	0		5.65698	327	0	0		5.65698	355	18	9

## Sheet: Fig.4_FS2-E_24 h R
nucleolus 1					nucleolus 2					nucleolus 3					nucleolus 4					nucleolus 5
	R	G				R	G				R	G				R	G				R	G
0	578	0	0		0	1395	0	0		0	754	0	0		0	339	7	7		0	241	30	10
0.02916	607.003	0	0		0.02916	1382.09	0	0		0.02916	933.74	0	0		0.02916	332.062	7.005	7.005		0.02916	248.221	34.083	11.361
0.05832	612.472	0	0		0.05832	1348.38	0	0		0.05832	1125.12	0	0		0.05832	333.052	4.021	4.021		0.05832	277.994	33.579	11.193
0.08748	595.757	0	0		0.08748	1294.3	0	0		0.08748	1310.19	0	0		0.08748	341.969	1.046	1.046		0.08748	337.918	28.176	9.392
0.11664	562.838	0	0		0.11664	1220.69	0	0		0.11664	1451.44	0	0		0.11664	355.856	1.021	1.021		0.11664	433.17	19.146	6.382
0.1458	525.156	0	0		0.1458	1133.56	0	0		0.1458	1549.24	0	0		0.1458	370.716	0.026	0.026		0.1458	573.408	10.62	3.54
0.17496	491.925	0	0		0.17496	1040.92	0	0		0.17496	1608.02	0	0		0.17496	384.598	0	0		0.17496	756.521	4.248	1.416
0.20412	470.584	0	0		0.20412	951.574	0	0		0.20412	1611.07	0	0		0.20412	398.567	0	0		0.20412	980.259	0	0
0.23328	465.091	0	0		0.23328	870.991	0	0		0.23328	1579.65	0	0		0.23328	414.629	0	0		0.23328	1221.87	0	0
0.26244	477.42	0	0		0.26244	804.981	0	0		0.26244	1524.5	0	0		0.26244	435.861	0	0		0.26244	1453.36	0	0
0.2916	508.986	0.00266667	0.004		0.2916	754.423	0	0		0.2916	1432.97	0	0		0.2916	465.309	0	0		0.2916	1642.62	0	0
0.32076	560.456	0	0		0.32076	719.828	0	0		0.32076	1314.84	0	0		0.32076	503.077	0	0		0.32076	1775.93	0	0
0.34992	630.348	0	0		0.34992	700.663	0	0		0.34992	1184.77	0	0		0.34992	550.227	0	0		0.34992	1845.35	0	0
0.37908	711.983	0.253333	0.38		0.37908	691.524	0	0		0.37908	1048.93	0	0		0.37908	607.619	0	0		0.37908	1856.06	0	0
0.40824	788.271	0.343333	0.515		0.40824	687.947	0	0		0.40824	921.535	0	0		0.40824	674.34	0	0		0.40824	1816.62	0	0
0.4374	837.127	1.03067	1.546		0.4374	687.289	0	0		0.4374	818.316	0	0		0.4374	754.036	0	0		0.4374	1739.22	0	0
0.46656	838.997	3.55733	5.336		0.46656	686.545	0	0		0.46656	742.984	0	0		0.46656	844.495	0	0		0.46656	1640.64	0	0
0.49572	787.16	6.68933	10.034		0.49572	684.679	1.986	1.986		0.49572	695.255	0	0		0.49572	944.464	0	0		0.49572	1536.53	0	0
0.52487	696.983	6.50933	9.764		0.52487	681.603	12.933	12.933		0.52487	672.701	0	0		0.52487	1044.56	0	0		0.52487	1442.03	0	0
0.55403	593.913	3.57467	5.362		0.55403	673.838	33.293	33.293		0.55403	668.199	0	0		0.55403	1134.52	0	0		0.55403	1362.2	0	0
0.58319	497.291	1.206	1.809		0.58319	661.613	56.194	56.194		0.58319	672.138	0	0		0.58319	1203.49	0	0		0.58319	1297.59	0	0
0.61235	420.604	0.274	0.411		0.61235	645.898	68.603	68.603		0.61235	675.783	0	0		0.61235	1244.79	0	0		0.61235	1243.5	0	0
0.64151	365.237	0.0286667	0.043		0.64151	627.814	62.286	62.286		0.64151	674.058	0	0		0.64151	1255.13	0	0		0.64151	1193.44	0	0
0.67067	329.916	0	0		0.67067	609.588	45.749	45.749		0.67067	662.091	0	0		0.67067	1235.81	0	0		0.67067	1141.1	0	0
0.69983	311.572	0	0		0.69983	594.427	23.571	23.571		0.69983	641.199	0	0		0.69983	1187.03	0	0		0.69983	1082.58	0	0
0.72899	309.053	0	0		0.72899	585.251	7.517	7.517		0.72899	613.154	0	0		0.72899	1110.88	0	0		0.72899	1020.32	0	0
0.75815	320.847	0	0		0.75815	583.952	1.111	1.111		0.75815	582.32	0	0		0.75815	1011.17	0	0		0.75815	959.283	0	0
0.78731	346.914	0	0		0.78731	590.29	0	0		0.78731	550.314	0	0		0.78731	896.851	0	0		0.78731	904.663	0	0
0.81647	387.539	0	0		0.81647	603.131	0	0		0.81647	516.865	0	0		0.81647	780.66	0	0		0.81647	856.412	0	0
0.84563	442.651	0	0		0.84563	619.52	0	0		0.84563	484.294	0	0		0.84563	673.619	0	0		0.84563	812.547	0	0
0.87479	512.499	0	0		0.87479	636.759	0	0		0.87479	451.53	0	0		0.87479	584.588	0	0		0.87479	768.825	0	0
0.90395	597.011	0	0		0.90395	653.39	0	0		0.90395	419.503	0	0		0.90395	517.567	0	0		0.90395	725.649	0	0
0.93311	695.359	0	0		0.93311	669.18	0	0		0.93311	392.199	0	0		0.93311	472.227	0	0		0.93311	677.197	0	0
0.96227	806.191	0	0		0.96227	684.323	0	0		0.96227	371.745	0	0		0.96227	445.046	0	0		0.96227	631.355	0	0
0.99143	922.352	0	0		0.99143	699.679	0	0		0.99143	361.228	0	0		0.99143	432.866	0	0		0.99143	583.341	0	0
1.02059	1033.59	0	0		1.02059	716.232	0	0		1.02059	362.769	0	0		1.02059	435.325	0	0		1.02059	542.35	0	0
1.04975	1129.93	0	0		1.04975	734.035	0	0		1.04975	375.867	0	0		1.04975	447.763	0	0		1.04975	501.613	0	0
1.07891	1202.61	0	0		1.07891	754.074	0	0		1.07891	397.747	0	0		1.07891	469.18	0	0		1.07891	464.538	0	0
1.10807	1246.2	0	0		1.10807	776.122	0	0		1.10807	424.015	0	0		1.10807	499.381	0	0		1.10807	427.699	0	0
1.13723	1271.97	0	0		1.13723	800.044	0	0		1.13723	448.036	0	0		1.13723	534.552	0	0		1.13723	391.482	0	0
1.16639	1288.27	0	0		1.16639	827.228	0	0		1.16639	469.042	0	0		1.16639	572.485	0	0		1.16639	355.647	0	0
1.19555	1302.73	0	0		1.19555	858.303	0	0		1.19555	487.86	0	0		1.19555	607.376	0	0		1.19555	319.988	0	0
1.22471	1320.56	0	0		1.22471	894.735	0	0		1.22471	508.039	0	0		1.22471	633.227	0	0		1.22471	287.296	0	0
1.25387	1346	0	0		1.25387	937.825	0	0		1.25387	540.649	0	0		1.25387	641.701	0	0		1.25387	258.733	0	0
1.28303	1383.75	0	0		1.28303	990.13	0	0		1.28303	589.408	0	0		1.28303	630.619	0	0		1.28303	235.477	0	0
1.31219	1437.29	0.066	0.099		1.31219	1054.01	0	0		1.31219	648.289	0	0		1.31219	600.474	0	0		1.31219	217.591	0	0
1.34135	1510.8	0.512	0.768		1.34135	1125.08	0	0		1.34135	713.534	0	0		1.34135	558.093	0	0		1.34135	206.742	0	0
1.37051	1598.23	0.710667	1.066		1.37051	1195.27	0.273	0.273		1.37051	770.156	0	0		1.37051	512.278	0	0		1.37051	202.977	0	0
1.39967	1698.55	0.698667	1.048		1.39967	1253.71	2.031	2.031		1.39967	795.52	0	0		1.39967	468.814	0	0		1.39967	205.011	0	0
1.42883	1801.16	0.168667	0.253		1.42883	1288.76	7.307	7.307		1.42883	790.875	0	0		1.42883	434.706	0	0		1.42883	212.413	0	0
1.45799	1890.94	0	0		1.45799	1292.54	18.785	18.785		1.45799	760.919	0	0		1.45799	408.68	0	0		1.45799	222.143	0	0
1.48715	1951.59	0	0		1.48715	1263.35	39.917	39.917		1.48715	715.732	0	0		1.48715	390.211	0	0		1.48715	230.928	0	0
1.5163	1965.92	0	0		1.5163	1210.79	74.919	74.919		1.5163	674.711	0	0		1.5163	376.268	0	0		1.5163	237.355	0	0
1.54546	1920.99	0	0		1.54546	1147.1	105.01	105.01		1.54546	647.199	0	0		1.54546	366.366	0	0		1.54546	240.052	0	0
1.57462	1810.41	0	0		1.57462	1082.92	109.519	109.519		1.57462	635.728	0	0		1.57462	358.227	0	0		1.57462	241.773	0	0
1.60378	1641.33	0	0		1.60378	1025.39	85.942	85.942		1.60378	638.256	0	0		1.60378	354.119	0	0		1.60378	244.574	0	0
1.63294	1435.38	0	0		1.63294	979.241	54.155	54.155		1.63294	649.448	0	0		1.63294	354.041	0	0		1.63294	252.05	0	0
1.6621	1222.7	0	0		1.6621	945.405	32.637	32.637		1.6621	659.598	0	0		1.6621	360.995	0	0		1.6621	267.317	0	0
1.69126	1030.59	0	0		1.69126	926.326	16.245	16.245		1.69126	662.843	0	0		1.69126	374.68	0	0		1.69126	292.124	0	0
1.72042	875.035	0	0		1.72042	923.521	6.467	6.467		1.72042	658.573	0	0		1.72042	394.778	0	0		1.72042	327.061	0	0
1.74958	761.167	0	0		1.74958	936.773	0	0		1.74958	645.299	0	0		1.74958	420.258	0	0		1.74958	367.722	0	0
1.77874	684.517	0	0		1.77874	966.309	0.08	0.08		1.77874	629.292	0.648	0.432		1.77874	448.83	0	0		1.77874	409.335	0	0
1.8079	636.401	0	0		1.8079	1008.06	1.431	1.431		1.8079	614.301	1.932	1.288		1.8079	477.361	0	0		1.8079	445.031	0	0
1.83706	607.017	0	0		1.83706	1055.81	0.357	0.357		1.83706	602.456	3.405	2.27		1.83706	507.129	0	0		1.83706	468.577	0	0
1.86622	588.144	0	0		1.86622	1097.1	0	0		1.86622	593.496	3.1395	2.093		1.86622	539.103	0	0		1.86622	478.558	0	0
1.89538	573.787	0	0		1.89538	1123.14	0	0		1.89538	584.256	1.206	0.804		1.89538	576.588	0	0		1.89538	476.196	0	0
1.92454	561.005	0	0		1.92454	1124.98	0	0		1.92454	569.754	0	0		1.92454	620.588	0	0		1.92454	467.151	0	0
1.9537	545.786	0	0		1.9537	1098.97	0	0		1.9537	547.052	0	0		1.9537	671.479	0	0		1.9537	457.093	0	0
1.98286	524.501	0	0		1.98286	1049.02	0	0		1.98286	515.401	0	0		1.98286	728.608	0	0		1.98286	450.003	0	0
2.01202	496.67	0	0		2.01202	981.425	0	0		2.01202	477.848	0	0		2.01202	786.701	0	0		2.01202	445.865	0	0
2.04118	462.904	0	0		2.04118	902.476	0	0		2.04118	442.805	0	0		2.04118	842.443	0	0		2.04118	446.104	0	0
2.07034	425.792	0	0		2.07034	818.495	0	0		2.07034	415.792	0	0		2.07034	892.232	0	0		2.07034	446.385	0	0
2.0995	389.407	0	0		2.0995	735.797	0	0		2.0995	400.763	0	0		2.0995	932.742	0	0		2.0995	449.102	0	0
2.12866	358.508	0	0		2.12866	658.255	0	0		2.12866	399.576	0	0		2.12866	964.381	0	0		2.12866	450.656	0	0
2.15782	336.95	0	0		2.15782	590.378	0	0		2.15782	408.79	0	0		2.15782	985.814	0	0		2.15782	456.038	0	0
2.18698	326.463	0	0		2.18698	535.334	0	0		2.18698	423.536	0	0		2.18698	996.232	0	0		2.18698	463.025	0	0
2.21614	326.794	0	0		2.21614	495.168	0	0		2.21614	433.479	0	0		2.21614	995.32	0	0		2.21614	472.998	0	0
2.2453	337.855	0	0		2.2453	470.356	0	0		2.2453	432.956	0	0		2.2453	980.139	0	0		2.2453	484.511	0	0
2.27446	358.302	0	0		2.27446	458.446	0	0		2.27446	418.345	0	0		2.27446	949.351	0	0		2.27446	496.444	0	0
2.30362	384.743	0	0		2.30362	453.75	0	0		2.30362	391.49	0	0		2.30362	902.778	0	0		2.30362	506.022	0	0
2.33278	412.598	0	0		2.33278	450.475	0	0		2.33278	362.315	0	0		2.33278	841.773	0	0		2.33278	510.357	0	0
2.36194	436.156	0	0		2.36194	442.211	0	0		2.36194	338.532	0	0		2.36194	771.273	0.418	0.418		2.36194	510.572	0	0
2.3911	449.738	0	0		2.3911	426.938	0	0		2.3911	324.415	0	0		2.3911	696.371	5.845	5.845		2.3911	504.139	0	0
2.42026	450.542	0	0		2.42026	405.462	0	0		2.42026	323.27	0	0		2.42026	624.83	16.284	16.284		2.42026	494.669	0	0
2.44942	439.322	0	0		2.44942	382.84	0	0		2.44942	333.37	0	0		2.44942	563.588	32.165	32.165		2.44942	483.206	0	0
2.47858	420.729	0	0		2.47858	364.701	0	0		2.47858	352.547	0	0		2.47858	515.459	50.505	50.505		2.47858	471.951	0	0
2.50774	401.542	0	0		2.50774	353.325	0	0		2.50774	377.78	0	0		2.50774	483.856	67.876	67.876		2.50774	461.102	0	0
2.53689	388.145	0	0		2.53689	347.931	0	0		2.53689	406.47	0	0		2.53689	466.66	82.381	82.381		2.53689	450.463	0	0
2.56605	383.566	0	0		2.56605	344.88	0	0		2.56605	437.716	0	0		2.56605	462.433	93.443	93.443		2.56605	438.464	0	0
2.59521	389.524	0	0		2.59521	337.507	0	0		2.59521	471.491	0	0		2.59521	469.093	101.129	101.129		2.59521	424.291	0	0
2.62437	404.299	0	0		2.62437	319.928	0	0		2.62437	509.607	0	0		2.62437	482.67	107.784	107.784		2.62437	406.967	0	0
2.65353	423.179	0	0		2.65353	290.438	0	0		2.65353	553.972	0	0		2.65353	498.196	114	114		2.65353	387.344	0	0
2.68269	439.29	0	0		2.68269	251.443	0	0		2.68269	606.408	0	0		2.68269	513.227	119.155	119.155		2.68269	367.172	0	0
2.71185	445.514	0	0		2.71185	209.709	0	0		2.71185	669.363	0	0		2.71185	524.82	120.768	120.768		2.71185	349.061	0	0
2.74101	439.391	0	0		2.74101	171.079	0	0		2.74101	743.744	0	0		2.74101	529.928	113.309	113.309		2.74101	337.993	0	0
2.77017	421.809	0	0		2.77017	139.534	0	0		2.77017	829.774	0	0		2.77017	528.098	94.737	94.737		2.77017	334.528	0	0
2.79933	398.109	0	0		2.79933	117.567	0	0		2.79933	933.662	0	0		2.79933	518.794	68.103	68.103		2.79933	345.409	0	0
2.82849	375	0	0		2.82849	104.75	0	0		2.82849	1057	0	0		2.82849	501.5	42	42		2.82849	370	0	0
2.85765	356.839	0	0		2.85765	99.557	0	0		2.85765	1193.03	0	0		2.85765	477.216	22.454	22.454		2.85765	416.691	0	0
2.88681	345.888	0	0		2.88681	100.863	0	0		2.88681	1344.35	0	0		2.88681	447.943	10.448	10.448		2.88681	483.919	0	0
2.91597	341.364	0	0		2.91597	106.359	0	0		2.91597	1501.77	0	0		2.91597	417.68	4.454	4.454		2.91597	578.657	0	0
2.94513	340.039	0	0		2.94513	113.711	0	0		2.94513	1641.63	0	0		2.94513	389.428	1.479	1.479		2.94513	698.263	0	0
2.97429	338.763	0	0		2.97429	121.458	0	0		2.97429	1754.31	0	0		2.97429	367.186	0	0		2.97429	843.013	0	0
3.00345	334.499	0	0		3.00345	128.346	0	0		3.00345	1823.75	0	0		3.00345	350.423	0	0		3.00345	1006.62	0	0
3.03261	325.219	0	0		3.03261	133.68	0	0		3.03261	1834.61	0	0		3.03261	340.588	0	0		3.03261	1178.62	0	0
3.06177	311.137	0	0		3.06177	138.314	0	0		3.06177	1787.93	0	0		3.06177	336.191	0	0		3.06177	1348.82	0	0
3.09093	294.253	0	0		3.09093	143.581	0	0		3.09093	1692.46	0	0		3.09093	336.124	0	0		3.09093	1492.8	0	0
3.12009	278.156	0	0		3.12009	151.67	0	0		3.12009	1561.42	0	0		3.12009	339.995	0	0		3.12009	1600.99	0	0
3.14925	266.793	0	0		3.14925	163.077	0	0		3.14925	1417.89	0	0		3.14925	348.247	0	0		3.14925	1656.53	0	0
3.17841	263.697	0	0		3.17841	176.383	0	0		3.17841	1285.67	0	0		3.17841	360.866	0	0		3.17841	1655.17	0	0
3.20757	272.143	0	0		3.20757	190.933	0	0		3.20757	1181.89	0	0		3.20757	379.402	2.567	2.567		3.20757	1592.51	0	0
3.23673	294.208	0	0		3.23673	204.826	0	0		3.23673	1120.41	0	0		3.23673	406.428	72.722	72.722		3.23673	1478.32	0	0
3.26589	331.39	0	0		3.26589	216.773	0	0		3.26589	1109.3	0	0		3.26589	445.536	335.402	335.402		3.26589	1326.85	0	0
3.29505	382.408	0	0		3.29505	227.17	0	0		3.29505	1152.06	16.149	10.766		3.29505	500.758	951.402	951.402		3.29505	1156.36	0	0
3.32421	441.148	0	0		3.32421	237.238	0	0		3.32421	1251.49	170.584	113.723		3.32421	579.474	1897.71	1897.71		3.32421	989.524	0	0
3.35337	498.572	0	0		3.35337	247.281	0	0		3.35337	1400.98	615.999	410.666		3.35337	690.778	2831.59	2831.59		3.35337	838.937	0	0
3.38253	545.946	0	0		3.38253	257.089	0	0		3.38253	1588.9	1233.8	822.533		3.38253	840.959	3320.57	3320.57		3.38253	711.278	0	0
3.41169	577.113	0	0		3.41169	267.222	0	0		3.41169	1793.47	1626.07	1084.05		3.41169	1037.93	3217.99	3217.99		3.41169	609.33	1.089	0.363
3.44085	591.629	0	0		3.44085	275.073	0	0		3.44085	1973.1	1629.2	1086.13		3.44085	1279.36	2660.36	2660.36		3.44085	530.122	3.21	1.07
3.47001	595.053	0	0		3.47001	278.283	0	0		3.47001	2099.45	1380.26	920.174		3.47001	1557.82	1979.88	1979.88		3.47001	473.091	6.648	2.216
3.49917	594.44	0	0		3.49917	275.793	0	0		3.49917	2159.51	1066.35	710.897		3.49917	1857.24	1376.94	1376.94		3.49917	432.065	12.861	4.287
3.52832	596.67	0	0		3.52832	268.691	0	0		3.52832	2154.66	792.768	528.512		3.52832	2159.26	930.541	930.541		3.52832	407.41	16.242	5.414
3.55748	607.344	0	0		3.55748	258.029	0	0		3.55748	2106.7	582.138	388.092		3.55748	2440.44	635.031	635.031		3.55748	393.577	17.073	5.691
3.58664	630.967	0	0		3.58664	250.003	0	0		3.58664	2038.35	441.864	294.576		3.58664	2679.66	455.227	455.227		3.58664	388.706	12.063	4.021
3.6158	672.393	0	0		3.6158	245.567	0	0		3.6158	1969.02	341.279	227.519		3.6158	2862.03	352.711	352.711		3.6158	387.485	6.774	2.258
3.64496	736.095	0	0		3.64496	247.779	0	0		3.64496	1908.76	267.043	178.029		3.64496	2964.91	302.247	302.247		3.64496	387.902	3.603	1.201
3.67412	827.403	0	0		3.67412	257.419	0	0		3.67412	1855.89	216.375	144.25		3.67412	2984.51	287.309	287.309		3.67412	385.235	1.671	0.557
3.70328	948.971	0	0		3.70328	273.157	0	0		3.70328	1806.63	179.256	119.504		3.70328	2929.18	298.144	298.144		3.70328	375.773	0	0
3.73244	1098.75	0	0		3.73244	293.184	0	0		3.73244	1754.88	153.907	102.605		3.73244	2818.96	321.34	321.34		3.73244	359.265	0	0
3.7616	1263.26	0	0		3.7616	311.248	0	0		3.7616	1694.07	142.447	94.965		3.7616	2679.81	334.644	334.644		3.7616	336.236	0	0
3.79076	1415.82	0	0		3.79076	324.148	0	0		3.79076	1624.56	140.571	93.714		3.79076	2529.84	308.763	308.763		3.79076	310.678	0	0
3.81992	1522.01	0	0		3.81992	332.085	0	0		3.81992	1551.18	143.252	95.501		3.81992	2386.22	232.309	232.309		3.81992	285.773	0	0
3.84908	1553.82	0	0		3.84908	336.217	0	0		3.84908	1480.31	143.637	95.758		3.84908	2255.25	127.773	127.773		3.84908	267.883	0	0
3.87824	1500.92	0	0		3.87824	341.685	0	0		3.87824	1421	135.46	90.307		3.87824	2141.48	38.026	38.026		3.87824	257.268	0	0
3.9074	1376.3	0	0		3.9074	353.438	0	0		3.9074	1380.13	117.261	78.174		3.9074	2048.9	0	0		3.9074	258.549	1.176	0.392
3.93656	1210.81	0	0		3.93656	376.784	0	0		3.93656	1362.1	91.6965	61.131		3.93656	1979.15	0	0		3.93656	272.459	4.638	1.546
3.96572	1036.79	0	0		3.96572	416.021	0	0		3.96572	1368.12	65.8125	43.875		3.96572	1932.31	0	0		3.96572	304.994	14.427	4.809
3.99488	879.147	0	0		3.99488	474.25	0	0		3.99488	1393.02	45.039	30.026		3.99488	1905.1	0	0		3.99488	360.203	49.863	16.621
4.02404	751.673	0	0		4.02404	551.852	0	0		4.02404	1428.86	30.9045	20.603		4.02404	1891.84	0	0		4.02404	451.891	247.983	82.661
4.0532	659.808	0	0		4.0532	647.648	0	0		4.0532	1468.08	20.046	13.364		4.0532	1884.82	0	0		4.0532	595.284	852.513	284.171
4.08236	602.637	0	0		4.08236	756.901	0	0		4.08236	1502.26	11.2515	7.501		4.08236	1873.89	0	0		4.08236	806.939	1875.91	625.303
4.11152	576.729	0	0		4.11152	877.84	0	0		4.11152	1527.57	4.5645	3.043		4.11152	1852.63	0	0		4.11152	1100.66	2977.24	992.414
4.14068	577.009	0	0		4.14068	1005.65	0	0		4.14068	1540.98	0.7755	0.517		4.14068	1819.44	0	0		4.14068	1485.17	3651.55	1217.18
4.16984	596.786	0	0		4.16984	1133.96	0	0		4.16984	1547.32	0	0		4.16984	1779.63	0	0		4.16984	1944.55	3641.06	1213.69
4.199	625.148	0	0		4.199	1255.53	0	0		4.199	1549.55	0.036	0.024		4.199	1740.55	0	0		4.199	2455.02	3032.51	1010.84
4.22816	651.92	0	0		4.22816	1354.05	0	0		4.22816	1547.47	4.443	2.962		4.22816	1713.31	0	0		4.22816	2970.52	2177.14	725.713
4.25732	668.436	0	0		4.25732	1424.31	0	0		4.25732	1544.73	13.9485	9.299		4.25732	1706.89	0	0		4.25732	3444.76	1406.42	468.806
4.28648	671.557	0	0		4.28648	1458.24	0	0		4.28648	1541.86	27.894	18.596		4.28648	1728.29	0	0		4.28648	3842.42	874.773	291.591
4.31564	665.714	0	0		4.31564	1450.73	0	0		4.31564	1539.53	46.032	30.688		4.31564	1778.6	0	0		4.31564	4127.41	554.43	184.81
4.3448	662.292	0	0		4.3448	1405.89	0	0		4.3448	1535.03	63.75	42.5		4.3448	1853.63	0	0		4.3448	4327.58	368.7	122.9
4.37396	670.948	2.396	3.594		4.37396	1335.43	0	0		4.37396	1530.67	78.8535	52.569		4.37396	1945.69	0	0		4.37396	4425.43	268.872	89.624
4.40312	704.032	25.8507	38.776		4.40312	1257.21	2.78	2.78		4.40312	1531.88	89.4345	59.623		4.40312	2045.85	0	0		4.40312	4438.88	206.835	68.945
4.43228	772.376	143.512	215.268		4.43228	1196.61	84.633	84.633		4.43228	1542.59	95.877	63.918		4.43228	2144.02	0	0		4.43228	4386.06	164.04	54.68
4.46144	885.944	501.719	752.578		4.46144	1171.04	339.316	339.316		4.46144	1569.63	99.3075	66.205		4.46144	2233.43	0	0		4.46144	4283.37	126.687	42.229
4.4906	1051.11	1122.04	1683.06		4.4906	1194.25	853.136	853.136		4.4906	1617.15	101.13	67.42		4.4906	2310.46	0	0		4.4906	4146.1	96.597	32.199
4.51975	1267.69	1762.26	2643.39		4.51975	1275.87	1524.53	1524.53		4.51975	1683.14	101.28	67.52		4.51975	2377.28	0	0		4.51975	3991.97	69.687	23.229
4.54891	1525.76	2112.85	3169.28		4.54891	1416.7	2061.96	2061.96		4.54891	1756.65	98.0925	65.395		4.54891	2435.02	0	0		4.54891	3839.76	53.043	17.681
4.57807	1803.06	2118.81	3178.21		4.57807	1621.15	2205.52	2205.52		4.57807	1823.84	93.537	62.358		4.57807	2489.79	0	0		4.57807	3689.01	41.874	13.958
4.60723	2062.56	1925.68	2888.52		4.60723	1882.95	1947.62	1947.62		4.60723	1875.91	87.6	58.4		4.60723	2543.49	0	0		4.60723	3545.65	37.113	12.371
4.63639	2268.22	1620.14	2430.21		4.63639	2183.03	1540.62	1540.62		4.63639	1911.89	82.4685	54.979		4.63639	2599.88	0	0		4.63639	3404.38	35.589	11.863
4.66555	2387.35	1265.11	1897.66		4.66555	2488.9	1201.05	1201.05		4.66555	1941	77.388	51.592		4.66555	2653.44	1.753	1.753		4.66555	3274.69	39.897	13.299
4.69471	2424.26	907.665	1361.5		4.69471	2750.05	958.622	958.622		4.69471	1980.72	70.389	46.926		4.69471	2704.62	22.082	22.082		4.69471	3164.93	45.891	15.297
4.72387	2381.15	658.123	987.185		4.72387	2918.83	793.022	793.022		4.72387	2039.18	61.2255	40.817		4.72387	2759.69	60.773	60.773		4.72387	3081.31	58.206	19.402
4.75303	2282.43	524.738	787.107		4.75303	2984.98	687.615	687.615		4.75303	2123.9	49.485	32.99		4.75303	2825.84	115.149	115.149		4.75303	3036.32	75.339	25.113
4.78219	2154.61	445.845	668.767		4.78219	2963.63	642.747	642.747		4.78219	2234	36.954	24.636		4.78219	2913.04	191.443	191.443		4.78219	3030.49	95.628	31.876
4.81135	2025.2	402.096	603.144		4.81135	2871.28	665.867	665.867		4.81135	2355.1	27.978	18.652		4.81135	3032.79	294.995	294.995		4.81135	3053.55	116.133	38.711
4.84051	1921.55	377.286	565.929		4.84051	2736.59	754.174	754.174		4.84051	2472.47	24.78	16.52		4.84051	3182.55	443.082	443.082		4.84051	3092.21	139.842	46.614
4.86967	1870.32	356.019	534.028		4.86967	2600.79	881.65	881.65		4.86967	2564.64	28.797	19.198		4.86967	3342.73	655.923	655.923		4.86967	3130.29	161.682	53.894
4.89883	1886.06	326.845	490.267		4.89883	2493.12	1023.12	1023.12		4.89883	2631.19	43.41	28.94		4.89883	3478.98	960.598	960.598		4.89883	3155.11	184.842	61.614
4.92799	1975.9	287.559	431.339		4.92799	2436.22	1154.36	1154.36		4.92799	2672.42	69.9855	46.657		4.92799	3535.4	1359.04	1359.04		4.92799	3164.27	208.671	69.557
4.95715	2140.53	243.608	365.412		4.95715	2445.6	1255.01	1255.01		4.95715	2677.38	105.763	70.509		4.95715	3477.44	1801.84	1801.84		4.95715	3168.96	239.01	79.67
4.98631	2369.52	205.081	307.621		4.98631	2525.54	1317.57	1317.57		4.98631	2675.78	141.042	94.028		4.98631	3277.09	2167.62	2167.62		4.98631	3189.58	276.123	92.041
5.01547	2638.78	179.619	269.429		5.01547	2667.66	1350.7	1350.7		5.01547	2677.84	163.002	108.668		5.01547	2907.79	2312.39	2312.39		5.01547	3263.6	319.671	106.557
5.04463	2905.9	172.356	258.534		5.04463	2849.59	1378.44	1378.44		5.04463	2686.71	169.094	112.729		5.04463	2426.74	2164.6	2164.6		5.04463	3404.05	362.454	120.818
5.07379	3110.37	188.072	282.108		5.07379	3023.65	1435.94	1435.94		5.07379	2711.8	165.606	110.404		5.07379	1924.03	1777.99	1777.99		5.07379	3619.04	398.523	132.841
5.10295	3187.54	237.015	355.523		5.10295	3144.22	1556.47	1556.47		5.10295	2742.63	166.714	111.143		5.10295	1466.01	1290.37	1290.37		5.10295	3890.99	422.043	140.681
5.13211	3078.95	341.233	511.849		5.13211	3169.37	1746.35	1746.35		5.13211	2764.97	188.385	125.59		5.13211	1087.81	826.99	826.99		5.13211	4198	435.66	145.22
5.16127	2738.65	533.83	800.745		5.16127	3062.22	2005.94	2005.94		5.16127	2742.39	239.165	159.443		5.16127	801.031	459.428	459.428		5.16127	4504.17	452.781	150.927
5.19043	2174.82	834.467	1251.7		5.19043	2797.89	2286.07	2286.07		5.19043	2633.46	334.476	222.984		5.19043	595.258	208.969	208.969		5.19043	4764.55	491.724	163.908
5.21959	1529.75	1198.08	1797.11		5.21959	2404.1	2541.51	2541.51		5.21959	2413.79	503.143	335.429		5.21959	455.278	66.371	66.371		5.21959	4929.93	587.784	195.928
5.24875	1006.98	1428.43	2142.65		5.24875	1946.97	2715.84	2715.84		5.24875	2078.99	773.927	515.951		5.24875	362.392	6.495	6.495		5.24875	4971.11	779.691	259.897
5.27791	647.955	1366.25	2049.38		5.27791	1516.9	2785.47	2785.47		5.27791	1666.15	1188.16	792.107		5.27791	304.789	0	0		5.27791	4851.61	1132.27	377.423
5.30707	428.408	947.105	1420.66		5.30707	1158.17	2753.11	2753.11		5.30707	1240.36	1826.58	1217.72		5.30707	271.639	0	0		5.30707	4542.38	1713.18	571.059
5.33623	303.645	407.523	611.284		5.33623	888.103	2635.36	2635.36		5.33623	865.212	2512.85	1675.23		5.33623	257.149	0	0		5.33623	4040.9	2601.44	867.148
5.36539	236.592	74.1667	111.25		5.36539	702.78	2441.07	2441.07		5.36539	572.705	2951.87	1967.91		5.36539	257.381	0	0		5.36539	3385.55	3774.14	1258.05
5.39455	204.032	12.0793	18.119		5.39455	586.026	2206.67	2206.67		5.39455	375.195	2960.85	1973.9		5.39455	269.536	0	0		5.39455	2664.71	4984.93	1661.64
5.42371	191.067	0	0		5.42371	521.932	1912.83	1912.83		5.42371	259.508	2523.39	1682.26		5.42371	290.588	0	0		5.42371	1997.39	5761.4	1920.47
5.45287	191.521	0	0		5.45287	496.538	1649.71	1649.71		5.45287	190.759	1830.51	1220.34		5.45287	316.675	0	0		5.45287	1448.7	5835.98	1945.33
5.48203	200.99	0	0		5.48203	497.026	1303.08	1303.08		5.48203	151.009	1162.97	775.311		5.48203	343.691	0	0		5.48203	1034.48	5241.59	1747.2
5.51119	218.824	0	0		5.51119	512.183	897.582	897.582		5.51119	132.846	655.237	436.825		5.51119	364.768	0	0		5.51119	749.758	3956.72	1318.91
5.54034	244.926	0	0		5.54034	532.247	517.25	517.25		5.54034	127.365	312.114	208.076		5.54034	374.897	0	0		5.54034	563.938	2479.16	826.388
5.5695	279.641	0	0		5.5695	546.036	237.398	237.398		5.5695	130.897	123.663	82.442		5.5695	373.985	0	0		5.5695	458.214	1310.73	436.909
5.59866	324.68	0	0		5.59866	546.249	78.713	78.713		5.59866	142.434	38.7975	25.865		5.59866	364.021	0	0		5.59866	405.416	569.46	189.82
5.62782	379.375	0	0		5.62782	532.31	7.262	7.262		5.62782	158.212	5.5635	3.709		5.62782	350.015	0	0		5.62782	393.413	220.626	73.542
5.65698	446	0	0		5.65698	507	0	0		5.65698	171	0	0		5.65698	336	0	0		5.65698	411	75	25

## Sheet: Fig.4_FS2-E_48 h R
nucleolus 1					nucleolus 2					nucleolus 3					nucleolus 4					nucleolus 5
	R	G				R	G				R	G				R	G				R	G
0	71	0	0		0	0	0	0		0	68	0	0		0	55	1	2		0	263	0	0
0.02916	66.314	0	0		0.02916	0	0	0		0.02916	75.722	0	0		0.02916	42.273	2.09	4.18		0.02916	276.052	0	0
0.05832	64.175	0	0		0.05832	0	0	0		0.05832	88.103	0	0		0.05832	29.989	4.108	8.216		0.05832	280.745	0	0
0.08748	64.386	0	0		0.08748	0.165	0	0		0.08748	101.649	0	0		0.08748	20.66	7.404	14.808		0.08748	277.751	0	0
0.11664	67.546	0	0		0.11664	0.887	0	0		0.11664	114.67	0	0		0.11664	15.07	14.5105	29.021		0.11664	267.803	0	0
0.1458	73.215	0	0		0.1458	1	0	0		0.1458	122.763	0	0		0.1458	18.293	27.635	55.27		0.1458	255.164	0	0
0.17496	82.338	0	0		0.17496	1	0	0		0.17496	128.526	0	0		0.17496	25.703	41.4645	82.929		0.17496	244.998	0.4936	1.234
0.20412	94.644	0	0		0.20412	1	0	0		0.20412	131.113	0	0		0.20412	38.689	48.3805	96.761		0.20412	239.338	2.0744	5.186
0.23328	112.028	0	0		0.23328	1	0	0		0.23328	134.629	0	0		0.23328	56.773	43.817	87.634		0.23328	240.562	5.1236	12.809
0.26244	135.21	0	0		0.26244	1	0	0		0.26244	139.067	0	0		0.26244	79.046	30.881	61.762		0.26244	252.001	8.0388	20.097
0.2916	164.494	0	0		0.2916	1.216	0	0		0.2916	148.155	0	0		0.2916	101.04	15.9475	31.895		0.2916	274.634	8.4176	21.044
0.32076	200.579	0	0		0.32076	1.975	0	0		0.32076	161.325	0	0		0.32076	120.66	5.663	11.326		0.32076	305.959	5.9604	14.901
0.34992	238.812	0	0		0.34992	2	0	0		0.34992	181.278	0	0		0.34992	142.89	1.2805	2.561		0.34992	341.738	2.9416	7.354
0.37908	272.724	0	0		0.37908	2	0	0		0.37908	205.356	0	0		0.37908	178.556	0.1575	0.315		0.37908	376.118	1.1612	2.903
0.40824	299.897	0	0		0.40824	2	0	0		0.40824	236.433	0	0		0.40824	225.376	0	0		0.40824	404.668	0.3876	0.969
0.4374	314.322	0	0		0.4374	2	0	0		0.4374	270.448	0	0		0.4374	278.619	0	0		0.4374	425.723	0.0536	0.134
0.46656	315.727	0	0		0.46656	2.57	0	0		0.46656	310.485	0	0		0.46656	336.154	0	0		0.46656	441.178	0	0
0.49572	309.252	0	0		0.49572	3.199	0	0		0.49572	351.242	0	0		0.49572	395.68	0	0		0.49572	450.801	0.0392	0.098
0.52487	295.141	0	0		0.52487	4.423	0	0		0.52487	395.196	0	0		0.52487	451.954	0	0		0.52487	463.206	0.2784	0.696
0.55403	280.119	0	0		0.55403	5.124	0	0		0.55403	441.299	0	0		0.55403	501.002	0	0		0.55403	482.585	0.5648	1.412
0.58319	265.947	0	0		0.58319	6.247	0	0		0.58319	489.371	0	0		0.58319	539.554	0	0		0.58319	509.257	0.8	2
0.61235	253.502	0	0		0.61235	7.66	0	0		0.61235	537.747	0	0		0.61235	564.261	0	0		0.61235	537.457	0.7216	1.804
0.64151	243.578	0	0		0.64151	9.096	0	0		0.64151	583.99	0	0		0.64151	572.36	0	0		0.64151	568.6	0.5516	1.379
0.67067	236.217	0	0		0.67067	10.485	0	0		0.67067	625.093	0	0		0.67067	562.829	0	0		0.67067	603.719	0.3204	0.801
0.69983	229.889	0	0		0.69983	12.474	0	0		0.69983	664.093	0	0		0.69983	536.47	0	0		0.69983	644.373	0.0248	0.062
0.72899	223.422	0	0		0.72899	14.898	0	0		0.72899	696.577	0	0		0.72899	492.871	0	0		0.72899	684.155	0	0
0.75815	216.903	0	0		0.75815	19.133	0	0		0.75815	720.887	0	0		0.75815	438.591	0	0		0.75815	720.797	0	0
0.78731	207.807	0	0		0.78731	25.65	0	0		0.78731	734.5	0.286	0.572		0.78731	385.157	0	0		0.78731	752.237	0	0
0.81647	193.278	0	0		0.81647	37.157	0	0		0.81647	733.577	0.871	1.742		0.81647	359.807	0	0		0.81647	771.611	0	0
0.84563	175.471	0	0		0.84563	56.422	0	0		0.84563	714.376	1.6135	3.227		0.84563	330.614	0	0		0.84563	766.041	0	0
0.87479	152.286	0	0		0.87479	91.923	0	0		0.87479	677.113	1.4895	2.979		0.87479	297.998	0	0		0.87479	736.28	0	0
0.90395	128.589	0	0		0.90395	149.825	0	0		0.90395	617.33	1	2		0.90395	265.801	0	0		0.90395	688.449	0	0
0.93311	106.435	0	0		0.93311	231.279	0	0		0.93311	544.845	0.5	1		0.93311	235.162	0	0		0.93311	632.314	0	0
0.96227	88.25	0	0		0.96227	342.095	0	0		0.96227	461.443	0.1055	0.211		0.96227	208.323	0	0		0.96227	575.591	0	0
0.99143	74.732	0	0		0.99143	472.93	0	0		0.99143	380.32	0	0		0.99143	184.255	0	0		0.99143	532.702	0	0
1.02059	66.275	0	0		1.02059	612.076	0	0		1.02059	305.088	0	0		1.02059	165.669	0	0		1.02059	506.492	0	0
1.04975	61.821	0	0		1.04975	747.352	0	0		1.04975	244.113	0	0		1.04975	151.928	0	0		1.04975	495.144	0	0
1.07891	60.422	0	0		1.07891	852.825	0	0		1.07891	199.49	0	0		1.07891	140.995	0	0		1.07891	491.825	0	0
1.10807	61.67	0	0		1.10807	921.595	2.25267	3.379		1.10807	172.227	0	0		1.10807	132.01	0	0		1.10807	488.32	0	0
1.13723	64.947	0	0		1.13723	944.313	10.286	15.429		1.13723	163.407	0	0		1.13723	121.938	0	0		1.13723	476.969	0	0
1.16639	69.969	0	0		1.16639	913.666	29.3393	44.009		1.16639	167.67	0	0		1.16639	108.246	0	0		1.16639	454.952	0	0
1.19555	75.851	0	0		1.19555	848.806	62.224	93.336		1.19555	185.892	0	0		1.19555	89.807	0	0		1.19555	426.384	0	0
1.22471	84.155	0	0		1.22471	764.155	105.537	158.305		1.22471	214.103	0	0		1.22471	67.658	0	0		1.22471	397.112	0	0
1.25387	94.417	0	0		1.25387	674.809	147.995	221.992		1.25387	247.34	0.1185	0.237		1.25387	44.534	0	0		1.25387	372.632	0	0
1.28303	107.608	0	0		1.28303	596.785	182.737	274.105		1.28303	280.505	0.5515	1.103		1.28303	22.909	0	0		1.28303	356.06	0	0
1.31219	125.119	0	0		1.31219	532.23	201.155	301.732		1.31219	302.057	0.9845	1.969		1.31219	7.502	0	0		1.31219	349.244	0	0
1.34135	146.073	0	0		1.34135	483.191	200.175	300.263		1.34135	307.526	2.2525	4.505		1.34135	1.451	0	0		1.34135	351.812	0	0
1.37051	170.659	0	0		1.37051	446.835	186.701	280.052		1.37051	295.149	3.5515	7.103		1.37051	0	0	0		1.37051	360.615	0.1624	0.406
1.39967	194.905	0	0		1.39967	418.694	164.416	246.624		1.39967	272.763	4.8505	9.701		1.39967	0	0	0		1.39967	372.729	0.3052	0.763
1.42883	215.428	0	0		1.42883	394.719	143.211	214.817		1.42883	244.655	6.5745	13.149		1.42883	0	0	0		1.42883	387.164	0.3504	0.876
1.45799	229.933	0	0		1.45799	373.738	125.486	188.229		1.45799	218.01	8	16		1.45799	0	0	0		1.45799	403.055	0.1376	0.344
1.48715	238.429	0	0		1.48715	354.736	111.937	167.906		1.48715	197.758	10.085	20.17		1.48715	0	0	0		1.48715	418.94	0	0
1.5163	241.514	0	0		1.5163	339.119	102.992	154.488		1.5163	185.093	11.4535	22.907		1.5163	0	0	0		1.5163	434.304	0	0
1.54546	238.891	0	0		1.54546	328.425	96.0327	144.049		1.54546	183.83	12.706	25.412		1.54546	0	0	0		1.54546	449.847	0	0
1.57462	232.248	0	0		1.57462	323.086	91.1893	136.784		1.57462	191.68	12.7115	25.423		1.57462	0	0	0		1.57462	465.008	0	0
1.60378	221.712	0	0		1.60378	326.646	87.2807	130.921		1.60378	208.82	11.1135	22.227		1.60378	0	0	0		1.60378	477.152	0	0
1.63294	207.971	0	0		1.63294	340.718	85.678	128.517		1.63294	227.918	8.763	17.526		1.63294	0	0	0		1.63294	485.469	0	0
1.6621	193.948	0	0		1.6621	362.273	86.636	129.954		1.6621	244.582	5.3685	10.737		1.6621	0	0	0		1.6621	487.834	0	0
1.69126	181.825	0	0		1.69126	392.764	91.182	136.773		1.69126	247.825	2.3865	4.773		1.69126	0	0	0		1.69126	484.804	0	0
1.72042	175.226	0	0		1.72042	430.395	102.891	154.336		1.72042	236.763	0.977	1.954		1.72042	0	0	0		1.72042	479.16	0	0
1.74958	175.387	0	0		1.74958	468.135	117.533	176.299		1.74958	208.443	0	0		1.74958	0	0	0		1.74958	474.608	0	0
1.77874	184.2	0	0		1.77874	502.83	130.833	196.25		1.77874	171.036	0	0		1.77874	0	0	0		1.77874	474.701	0	0
1.8079	202.747	0	0		1.8079	527.838	134.547	201.821		1.8079	129.99	0	0		1.8079	0	0	0		1.8079	479.814	0	0
1.83706	228.766	0	0		1.83706	540.351	125.98	188.97		1.83706	94.515	0	0		1.83706	0	0	0		1.83706	491.152	0	0
1.86622	261.031	0	0		1.86622	544.808	106.689	160.034		1.86622	63.165	0	0		1.86622	0	0	0		1.86622	503.804	0	0
1.89538	294.68	0	0		1.89538	541.761	83.88	125.82		1.89538	40.727	0.2885	0.577		1.89538	0	0	0		1.89538	518.248	0	0
1.92454	325.254	0	0		1.92454	533.274	68.7787	103.168		1.92454	23.99	1.273	2.546		1.92454	0	0	0		1.92454	517.649	0	0
1.9537	350.495	0	0		1.9537	522.124	60.8453	91.268		1.9537	15.876	4.4615	8.923		1.9537	0	0	0		1.9537	498.473	0	0
1.98286	368.954	0	0		1.98286	505.384	61.308	91.962		1.98286	13.68	10.536	21.072		1.98286	0	0	0		1.98286	465.807	0	0
2.01202	381.749	0	0		2.01202	479.012	72.9887	109.483		2.01202	20	15.585	31.17		2.01202	0	0	0		2.01202	428.631	0	0
2.04118	390.206	0	0		2.04118	444.964	89.3913	134.087		2.04118	32.948	16.474	32.948		2.04118	0	0	0		2.04118	395.326	0	0
2.07034	393.263	0	0		2.07034	407.689	106.183	159.275		2.07034	58.753	14.902	29.804		2.07034	0	0	0		2.07034	374.477	0	0
2.0995	389.95	0	0		2.0995	376.085	110.33	165.495		2.0995	91.361	12.098	24.196		2.0995	0	0	0		2.0995	368.769	0	0
2.12866	380.218	0	0		2.12866	352.694	104.311	156.467		2.12866	132.546	10.08	20.16		2.12866	0	0	0		2.12866	379.714	0	0
2.15782	365.038	0	0		2.15782	341.159	90.1613	135.242		2.15782	172.072	8.2115	16.423		2.15782	0	0	0		2.15782	402.512	0	0
2.18698	346.655	0	0		2.18698	344.758	76.06	114.09		2.18698	201.51	7.4435	14.887		2.18698	0	0	0		2.18698	433.183	0	0
2.21614	328.849	0	0		2.21614	360.293	69.3007	103.951		2.21614	215.928	7.464	14.928		2.21614	0	0	0		2.21614	465.371	0	0
2.2453	314.151	0	0		2.2453	382.877	70.774	106.161		2.2453	213.954	8.4795	16.959		2.2453	0	0	0		2.2453	491.212	0	0
2.27446	304.065	0	0		2.27446	410.454	81.0847	121.627		2.27446	205.619	9.9535	19.907		2.27446	0	0	0		2.27446	502.329	0	0
2.30362	297.357	0	0		2.30362	436.171	100.315	150.473		2.30362	193.608	10.8375	21.675		2.30362	0	0	0		2.30362	494.701	0	0
2.33278	292.99	0	0		2.33278	456.47	130.959	196.439		2.33278	185.495	11.2215	22.443		2.33278	0	0	0		2.33278	470.674	0	0
2.36194	286.971	0	0		2.36194	471.348	169.649	254.473		2.36194	181.495	10.4255	20.851		2.36194	0	0	0		2.36194	435.875	0	0
2.3911	279.718	0	0		2.3911	475.533	230.247	345.37		2.3911	182.99	8.4845	16.969		2.3911	0	0	0		2.3911	398.67	0	0
2.42026	272.48	0	0		2.42026	473.76	323.454	485.181		2.42026	185.562	7.1855	14.371		2.42026	0	0	0		2.42026	361.609	0	0
2.44942	267.27	0	0		2.44942	465.873	463.798	695.697		2.44942	184.546	6.629	13.258		2.44942	0	0	0		2.44942	327.116	0	0
2.47858	265.461	0	0		2.47858	454.489	729.966	1094.95		2.47858	174.876	6.598	13.196		2.47858	0	0	0		2.47858	295.753	0	0
2.50774	269.956	0	0		2.50774	446.261	1141.01	1711.51		2.50774	158.567	6.526	13.052		2.50774	0	0	0		2.50774	268.019	0	0
2.53689	277.501	0	0		2.53689	446.912	1704.87	2557.31		2.53689	134.995	5.9045	11.809		2.53689	0	0	0		2.53689	241.652	0	0
2.56605	288.22	0	0		2.56605	468.455	2487.46	3731.19		2.56605	111.464	4.4845	8.969		2.56605	0	0	0		2.56605	219.393	0	0
2.59521	298.556	0	0		2.59521	521.088	3085.4	4628.1		2.59521	89.381	2.392	4.784		2.59521	0	0	0		2.59521	204.521	0	0
2.62437	305.495	0	0		2.62437	614.069	3325.52	4988.28		2.62437	73.866	1.093	2.186		2.62437	0	0	0		2.62437	201.323	0	0
2.65353	310.165	0	0		2.65353	772.244	3046.68	4570.02		2.65353	64.969	0.348	0.696		2.65353	0	0	0		2.65353	210.028	0	0
2.68269	310.804	0	0		2.68269	1009.21	2339.92	3509.88		2.68269	61.66	0	0		2.68269	0	0	0		2.68269	230.459	0	0
2.71185	311.837	0	0		2.71185	1319.33	1560.02	2340.02		2.71185	64.876	0	0		2.71185	0	0	0		2.71185	257.298	0	0
2.74101	316.389	0	0		2.74101	1701.18	945.307	1417.96		2.74101	72.412	0	0		2.74101	0	0	0		2.74101	285.636	0	0
2.77017	328.668	0	0		2.77017	2091	542.355	813.532		2.77017	84.948	0	0		2.77017	0	0	0		2.77017	307.526	0	0
2.79933	353.422	0	0		2.79933	2431.63	287.113	430.669		2.79933	102.01	0	0		2.79933	0	0	0		2.79933	318.454	0	0
2.82849	395	0	0		2.82849	2677	140	210		2.82849	123.5	0.25	0.5		2.82849	0	0	0		2.82849	320	0	0
2.85765	461.958	0	0		2.85765	2753.84	74.224	111.336		2.85765	149.32	0.5	1		2.85765	0	0	0		2.85765	315.734	0	0
2.88681	556.867	0	0		2.88681	2733.37	32.37	48.555		2.88681	176.969	0.5	1		2.88681	0	0	0		2.88681	310.03	0	0
2.91597	686.275	0	0		2.91597	2628.57	6.804	10.206		2.91597	204.753	0.5	1		2.91597	0	0	0		2.91597	304.935	0	0
2.94513	849.745	0	0		2.94513	2441.82	1.73867	2.608		2.94513	227.655	0.5	1		2.94513	0	0	0		2.94513	300.706	0	0
2.97429	1038.74	0	0		2.97429	2211.45	0	0		2.97429	240.32	0.665	1.33		2.97429	6.364	0	0		2.97429	298.656	0	0
3.00345	1238.76	0	0		3.00345	1964	0	0		3.00345	239.345	1.098	2.196		3.00345	26.726	0	0		3.00345	299.299	0	0
3.03261	1415.11	0	0		3.03261	1736.27	0	0		3.03261	224.515	1.593	3.186		3.03261	53.226	0	0		3.03261	314.505	0	0
3.06177	1538.74	0	0		3.06177	1538.61	0	0		3.06177	199.304	3.3735	6.747		3.06177	85.474	0	0		3.06177	347.077	0	0
3.09093	1584.85	0	0		3.09093	1369.55	0	0		3.09093	169.979	7.572	15.144		3.09093	126.381	0	0		3.09093	399.852	0	0
3.12009	1545.66	0	0		3.12009	1236.53	0	0		3.12009	145.015	15.438	30.876		3.12009	171.742	0	0		3.12009	476.12	30.0956	75.239
3.14925	1428.99	0	0		3.14925	1138.46	0	0		3.14925	123.959	27.335	54.67		3.14925	219.903	0	0		3.14925	577.508	159.942	399.855
3.17841	1258.25	0.851	0.851		3.17841	1062.49	0	0		3.17841	111.624	37.6985	75.397		3.17841	267.498	0	0		3.17841	698.317	409.751	1024.38
3.20757	1061.84	18.948	18.948		3.20757	1004.92	0	0		3.20757	102.165	40.3095	80.619		3.20757	307.916	0	0		3.20757	820.94	742.424	1856.06
3.23673	867.231	59.355	59.355		3.23673	956.256	0	0		3.23673	97.51	30.5205	61.041		3.23673	335.818	0	0		3.23673	934.206	1076.47	2691.17
3.26589	695.658	97.158	97.158		3.26589	911.779	0	0		3.26589	93.103	15.165	30.33		3.26589	347.104	0	0		3.26589	1010.55	1297.48	3243.71
3.29505	561.863	118.83	118.83		3.29505	869.657	0	0		3.29505	91.227	4.9795	9.959		3.29505	340.642	0	0		3.29505	1023.61	1345.21	3363.04
3.32421	468.239	133.207	133.207		3.32421	827.137	0	0		3.32421	87.948	1.5565	3.113		3.32421	317.027	0	0		3.32421	969.047	1215.51	3038.78
3.35337	420.852	151.464	151.464		3.35337	787.878	1.14867	1.723		3.35337	86.356	0.603	1.206		3.35337	285.299	0	0		3.35337	865.387	960.382	2400.96
3.38253	413.813	192.083	192.083		3.38253	756.34	0.841333	1.262		3.38253	84.639	0.5	1		3.38253	252.741	0	0		3.38253	743.845	682.919	1707.3
3.41169	450.143	269.956	269.956		3.41169	733.534	0	0		3.41169	85.16	0.58	1.16		3.41169	225.175	0	0		3.41169	626.422	472.954	1182.38
3.44085	536.93	404.905	404.905		3.44085	719.941	0	0		3.44085	87.371	1.335	2.67		3.44085	208.766	0.2745	0.549		3.44085	520.048	331.51	828.775
3.47001	683.125	613.886	613.886		3.47001	713.087	0	0		3.47001	92.809	3.9895	7.979		3.47001	208.139	5.8355	11.671		3.47001	429.954	238.587	596.468
3.49917	894.574	893.789	893.789		3.49917	710.495	0	0		3.49917	101.505	7.0465	14.093		3.49917	227.471	30.6895	61.379		3.49917	357.412	182.634	456.585
3.52832	1168.27	1195.87	1195.87		3.52832	706.433	0	0		3.52832	115.727	11.9435	23.887		3.52832	271.579	101.718	203.436		3.52832	306.315	151.437	378.593
3.55748	1486.19	1455.8	1455.8		3.55748	695.219	0	0		3.55748	133.093	11.8455	23.691		3.55748	345.966	245.382	490.765		3.55748	276.562	135.422	338.556
3.58664	1818.92	1590.37	1590.37		3.58664	674.789	0	0		3.58664	155.536	12.7525	25.505		3.58664	452.379	432.245	864.491		3.58664	253.589	127.264	318.161
3.6158	2130.41	1567.86	1567.86		3.6158	645.983	0	0		3.6158	182.155	7.9795	15.959		3.6158	589.981	603.327	1206.65		3.6158	238.478	120.485	301.212
3.64496	2390.75	1434.83	1434.83		3.64496	612.676	0	0		3.64496	210.062	7.9845	15.969		3.64496	758.112	697.909	1395.82		3.64496	231.514	110.854	277.134
3.67412	2588.11	1208.73	1208.73		3.67412	579.332	0	0		3.67412	238.722	4.8505	9.701		3.67412	925.732	679.033	1358.07		3.67412	233.291	97.708	244.27
3.70328	2684.64	1012.95	1012.95		3.70328	555.345	0	0		3.70328	262.505	6.652	13.304		3.70328	1055.97	562.537	1125.07		3.70328	244.143	81.8736	204.684
3.73244	2678.74	833.539	833.539		3.73244	542.523	0	0		3.73244	282.062	8.763	17.526		3.73244	1116.48	395.033	790.065		3.73244	260.042	65.8992	164.748
3.7616	2572.72	702.158	702.158		3.7616	541.843	0	0		3.7616	291.036	19.554	39.108		3.7616	1107.62	231.018	462.035		3.7616	277.699	51.7764	129.441
3.79076	2392.48	618.727	618.727		3.79076	560.311	0	0		3.79076	293.155	43.7475	87.495		3.79076	1052.07	112.853	225.705		3.79076	291.735	40.664	101.66
3.81992	2183.74	562.542	562.542		3.81992	596.056	0	0		3.81992	284.675	100.616	201.232		3.81992	964.8	45.516	91.032		3.81992	299.102	32.4508	81.127
3.84908	1980.23	537.726	537.726		3.84908	645.981	0	0		3.84908	270.052	213.052	426.103		3.84908	862.353	15.965	31.93		3.84908	297.149	26.1736	65.434
3.87824	1796.42	521.169	521.169		3.87824	711.957	0	0		3.87824	248.67	411.621	823.242		3.87824	758.559	2.8195	5.639		3.87824	288.578	20.9568	52.392
3.9074	1643.46	507.359	507.359		3.9074	799.975	5.15067	7.726		3.9074	225.381	702.114	1404.23		3.9074	668.636	0.2835	0.567		3.9074	279.07	17.3264	43.316
3.93656	1521.27	485.745	485.745		3.93656	904.451	27.4687	41.203		3.93656	208.253	1045.83	2091.66		3.93656	604.002	0	0		3.93656	270.211	14.906	37.265
3.96572	1421.5	452.856	452.856		3.96572	1027.25	61.6213	92.432		3.96572	201.454	1356.04	2712.07		3.96572	559.701	0	0		3.96572	265.351	13.064	32.66
3.99488	1342.54	407.928	407.928		3.99488	1171.89	109.072	163.608		3.99488	214.644	1523.8	3047.59		3.99488	529.573	0	0		3.99488	267.341	12.3168	30.792
4.02404	1268.69	354.603	354.603		4.02404	1337.07	178.179	267.269		4.02404	249.742	1500.92	3001.84		4.02404	507.407	0	0		4.02404	278.43	13.1908	32.977
4.0532	1203.43	299.468	299.468		4.0532	1515.46	267.297	400.945		4.0532	318.49	1306.86	2613.72		4.0532	489.86	0	0		4.0532	300.174	15.1724	37.931
4.08236	1141.73	242.856	242.856		4.08236	1696.7	376.198	564.297		4.08236	419.928	995.067	1990.13		4.08236	474.178	0	0		4.08236	333.65	17.994	44.985
4.11152	1088.73	192.304	192.304		4.11152	1870.54	504.428	756.642		4.11152	559.464	696.848	1393.7		4.11152	470.857	0	0		4.11152	378.587	21.1708	52.927
4.14068	1050.7	151.991	151.991		4.14068	2020.19	624.086	936.129		4.14068	722.299	497.34	994.68		4.14068	478.015	0	0		4.14068	431.784	24.7372	61.843
4.16984	1023.89	120.957	120.957		4.16984	2127.63	722.993	1084.49		4.16984	919.067	376.373	752.747		4.16984	482.406	0.3305	0.661		4.16984	484.13	28.2164	70.541
4.199	1021.83	103.847	103.847		4.199	2188.27	787.886	1181.83		4.199	1104.97	295.232	590.464		4.199	476.189	2.6925	5.385		4.199	524.952	31.5408	78.852
4.22816	1034.01	95.532	95.532		4.22816	2188.17	809.567	1214.35		4.22816	1234.06	250.306	500.613		4.22816	461.146	8.3785	16.757		4.22816	545.971	34.152	85.38
4.25732	1062.49	97.206	97.206		4.25732	2144.42	796.892	1195.34		4.25732	1286.97	227.201	454.402		4.25732	441.814	16.4785	32.957		4.25732	548.564	36.3456	90.864
4.28648	1102.61	107.358	107.358		4.28648	2071.26	751.707	1127.56		4.28648	1273.18	225.858	451.716		4.28648	423.141	25.531	51.062		4.28648	541.45	38.5992	96.498
4.31564	1142.29	123.529	123.529		4.31564	1964.74	675.758	1013.64		4.31564	1203.54	238.866	477.732		4.31564	409.737	34.713	69.426		4.31564	533.555	41.3056	103.264
4.3448	1179.53	146.291	146.291		4.3448	1845.51	583.245	874.867		4.3448	1112.27	266.567	533.134		4.3448	404.025	44.32	88.64		4.3448	531.543	45.1172	112.793
4.37396	1201.75	168.249	168.249		4.37396	1723.47	489.905	734.857		4.37396	1014.89	299.788	599.577		4.37396	406.503	54.686	109.372		4.37396	542.689	50.268	125.67
4.40312	1208.86	187.204	187.204		4.40312	1593.25	398.731	598.096		4.40312	943.067	329.729	659.459		4.40312	415.962	65.1325	130.265		4.40312	571.033	56.2864	140.716
4.43228	1203.58	203.012	203.012		4.43228	1453.45	314.633	471.95		4.43228	890.495	346.531	693.062		4.43228	430.449	74.76	149.52		4.43228	617.095	62.3848	155.962
4.46144	1190.85	216.833	216.833		4.46144	1315.07	242.612	363.918		4.46144	863.948	345.562	691.124		4.46144	447.291	82.09	164.18		4.46144	677.054	67.1124	167.781
4.4906	1175.65	230.65	230.65		4.4906	1178.79	180.093	270.139		4.4906	848.505	329.479	658.959		4.4906	462.054	86.6535	173.307		4.4906	742.545	68.896	172.24
4.51975	1165.15	247.045	247.045		4.51975	1051.97	130.104	195.156		4.51975	845.753	302.263	604.526		4.51975	470.391	88.6805	177.361		4.51975	804.083	66.5648	166.412
4.54891	1163.53	267.196	267.196		4.54891	948.116	91.8447	137.767		4.54891	841.814	272.32	544.639		4.54891	471.048	89.147	178.294		4.54891	856.297	60.5196	151.299
4.57807	1176.2	294.66	294.66		4.57807	865.247	61.1047	91.657		4.57807	842.412	245.989	491.979		4.57807	460.579	90.975	181.95		4.57807	893.129	52.5692	131.423
4.60723	1208.71	330.743	330.743		4.60723	801.806	36.7353	55.103		4.60723	837.402	224.567	449.134		4.60723	438.092	95.228	190.456		4.60723	913.495	44.7056	111.764
4.63639	1265.77	374.829	374.829		4.63639	766.483	19.1407	28.711		4.63639	848.309	208.194	416.387		4.63639	404.022	101.54	203.081		4.63639	916.545	38.8336	97.084
4.66555	1353.71	425.843	425.843		4.66555	746.112	6.04267	9.064		4.66555	868.794	193.212	386.423		4.66555	365.041	108.073	216.146		4.66555	904.765	36.5684	91.421
4.69471	1482.61	471.052	471.052		4.69471	734.505	0	0		4.69471	920.005	181.464	362.928		4.69471	339.365	113.144	226.288		4.69471	879.563	39.0308	97.577
4.72387	1649.69	507.895	507.895		4.72387	731.418	0	0		4.72387	989.876	172	344		4.72387	339.4	115.228	230.457		4.72387	843.815	47.5448	118.862
4.75303	1855.65	535.504	535.504		4.75303	735.145	0	0		4.75303	1086.67	171.124	342.247		4.75303	354.227	117.555	235.109		4.75303	805.983	64.8884	162.221
4.78219	2095.07	562.733	562.733		4.78219	740.898	0	0		4.78219	1197.75	179.036	358.072		4.78219	382.246	122.088	244.176		4.78219	772.194	92.3948	230.987
4.81135	2351.69	604.453	604.453		4.81135	750.407	0	0		4.81135	1312.93	209.376	418.753		4.81135	425.248	132.263	264.526		4.81135	750.183	132.154	330.384
4.84051	2591.81	685.014	685.014		4.84051	771.062	0	0		4.84051	1420.95	263.897	527.794		4.84051	484.692	150.611	301.222		4.84051	746.695	183.163	457.908
4.86967	2757.22	819.179	819.179		4.86967	803.295	0	0		4.86967	1502.16	366.06	732.119		4.86967	558.577	179.993	359.986		4.86967	772.799	239.628	599.07
4.89883	2815.89	1042.27	1042.27		4.89883	848.894	0	0		4.89883	1558.9	513.242	1026.48		4.89883	646.115	221.105	442.209		4.89883	847.794	291.748	729.37
4.92799	2737.45	1372.64	1372.64		4.92799	920.283	0	0		4.92799	1570.01	724.119	1448.24		4.92799	742.478	275.495	550.99		4.92799	949.267	328.53	821.325
4.95715	2521.94	1818.48	1818.48		4.95715	1020.24	0	0		4.95715	1543.17	962.819	1925.64		4.95715	828.503	346.118	692.237		4.95715	1068.09	341.991	854.977
4.98631	2205	2378.36	2378.36		4.98631	1147.14	0.243333	0.365		4.98631	1418.06	1189.11	2378.22		4.98631	886.813	437.69	875.381		4.98631	1186.18	334.483	836.207
5.01547	1831.13	2920.22	2920.22		5.01547	1307.56	5.15067	7.726		5.01547	1236.29	1293.95	2587.91		5.01547	906.123	555.957	1111.91		5.01547	1285.08	318.534	796.336
5.04463	1455.73	3201.97	3201.97		5.04463	1489.33	31.6373	47.456		5.04463	1026.87	1204.04	2408.08		5.04463	881.063	708.26	1416.52		5.04463	1348.09	306.592	766.48
5.07379	1118.81	3032.99	3032.99		5.07379	1667.92	92.228	138.342		5.07379	831.34	985.696	1971.39		5.07379	813.659	908.784	1817.57		5.07379	1370.58	309.669	774.172
5.10295	844.185	2498.96	2498.96		5.10295	1819.24	227.32	340.98		5.10295	675.515	683.196	1366.39		5.10295	713.307	1167.43	2334.85		5.10295	1337.85	338.168	845.419
5.13211	638.724	1796.28	1796.28		5.13211	1906.37	539.387	809.08		5.13211	531.093	388.257	776.515		5.13211	600.516	1428.99	2857.99		5.13211	1228.99	406.238	1015.6
5.16127	493.709	1102.72	1102.72		5.16127	1906.82	1099.27	1648.9		5.16127	397.036	170.376	340.753		5.16127	492.701	1642.18	3284.37		5.16127	1055.31	549.374	1373.43
5.19043	401.394	588.773	588.773		5.19043	1822.01	1939.12	2908.67		5.19043	276.412	49.428	98.856		5.19043	392.854	1783.14	3566.29		5.19043	859.74	795.47	1988.68
5.21959	346.377	272.48	272.48		5.21959	1649.43	2915.89	4373.84		5.21959	182.68	6.433	12.866		5.21959	307.638	1800.51	3601.02		5.21959	668.247	1093.17	2732.93
5.24875	320.236	113.781	113.781		5.24875	1434.32	3502.45	5253.68		5.24875	116.402	0.6805	1.361		5.24875	239.238	1669.89	3339.77		5.24875	492.934	1338.02	3345.05
5.27791	314.438	43.628	43.628		5.27791	1204.67	3518.16	5277.23		5.27791	76.144	0	0		5.27791	188.55	1403.39	2806.78		5.27791	347.202	1442.75	3606.89
5.30707	324.722	14.08	14.08		5.30707	985.906	2897.05	4345.58		5.30707	52.536	0	0		5.30707	155.446	1022.98	2045.97		5.30707	240.521	1333.36	3333.41
5.33623	345.995	3.991	3.991		5.33623	798.485	2009.63	3014.45		5.33623	45.464	0	0		5.33623	155.266	599.841	1199.68		5.33623	170.001	1021.24	2553.1
5.36539	376.907	0.974	0.974		5.36539	647.69	1216.94	1825.42		5.36539	48.278	0	0		5.36539	180.876	266.576	533.152		5.36539	124.31	629.501	1573.75
5.39455	409.651	4.488	4.488		5.39455	533.679	689.463	1034.19		5.39455	62.794	0	0		5.39455	213.022	78.546	157.092		5.39455	90.911	322.832	807.079
5.42371	441.828	11.151	11.151		5.42371	447.947	376.597	564.896		5.42371	83.289	0	0		5.42371	248.918	13.752	27.504		5.42371	65.933	131.239	328.097
5.45287	468.611	20.307	20.307		5.45287	383.167	208.397	312.595		5.45287	113.253	0	0		5.45287	278.065	0	0		5.45287	47.391	39.1768	97.942
5.48203	480.709	29.417	29.417		5.48203	335.599	134.788	202.182		5.48203	142.412	0	0		5.48203	294.269	0	0		5.48203	35.037	6.23	15.575
5.51119	480.715	35.576	35.576		5.51119	300.781	107.019	160.529		5.51119	167.144	0	0		5.51119	293.353	0	0		5.51119	28.788	0	0
5.54034	460.344	40.267	40.267		5.54034	272.86	106.771	160.156		5.54034	179.814	0	0		5.54034	274.974	0	0		5.54034	27.32	0	0
5.5695	428.16	41.959	41.959		5.5695	250.39	131.973	197.96		5.5695	176.732	0.25	0.5		5.5695	236.545	0	0		5.5695	31.454	0	0
5.59866	389.853	42.214	42.214		5.59866	230.538	179.511	269.266		5.59866	160.546	0.5	1		5.59866	193.529	0	0		5.59866	40.309	0	0
5.62782	352.236	38.783	38.783		5.62782	210.456	238.949	358.423		5.62782	135.474	1.884	3.768		5.62782	152.681	0	0		5.62782	54.072	0	0
5.65698	322	30	30		5.65698	188	300	450		5.65698	110	4	8		5.65698	119	0	0		5.65698	72	0	0

## Sheet: Fig.4_FS2-E_5 d R
nucleolus 1					nucleolus 2					nucleolus 3					nucleolus 4					nucleolus 5
	R	G				R	G				R	G				R	G				R	G
0	0	0	0		0	9	0	0		0	238	9	18		0	14	0	0		0	63	0	0
0.02916	0	0	0		0.02916	13.407	0	0		0.02916	267.783	11.7045	23.409		0.02916	21.47	0.7568	1.892		0.02916	107.379	0	0
0.05832	0	0	0		0.05832	16.892	0	0		0.05832	298.521	11.7245	23.449		0.05832	31.52	1.1176	2.794		0.05832	162.195	0	0
0.08748	0	0	0		0.08748	18.148	0	0		0.08748	330.784	8.8325	17.665		0.08748	42.468	1.87	4.675		0.08748	222.234	0	0
0.11664	0	0	0		0.11664	17.243	0	0		0.11664	365.941	5.7365	11.473		0.11664	55.194	2.6268	6.567		0.11664	279.323	0	0
0.1458	0	0	0		0.1458	15.252	0	0		0.1458	403.869	3.505	7.01		0.1458	70.18	3.1848	7.962		0.1458	322.383	0	0
0.17496	0.519	0	0		0.17496	13.464	0	0		0.17496	441.471	2.325	4.65		0.17496	86.755	3.2	8		0.17496	340.796	0	0
0.20412	1.277	0	0		0.20412	13.34	0	0		0.20412	472.747	1.394	2.788		0.20412	103.563	2.8144	7.036		0.20412	337.387	0	0
0.23328	3.85	0	0		0.23328	16.062	0	0		0.23328	486.84	0.6185	1.237		0.23328	120.902	2.4164	6.041		0.23328	316.641	0	0
0.26244	6.641	0	0		0.26244	23.91	0	0		0.26244	478.832	0.1795	0.359		0.26244	137.002	1.6824	4.206		0.26244	288.041	0	0
0.2916	11.601	0	0		0.2916	36.405	0	0		0.2916	446.417	0	0		0.2916	152.088	1.2212	3.053		0.2916	257.43	0	0
0.32076	17.734	0	0		0.32076	54.582	0	0		0.32076	394.75	0	0		0.32076	167.967	0.7916	1.979		0.32076	232.179	0	0
0.34992	27.158	0	0		0.34992	81.485	0	0		0.34992	333.747	0	0		0.34992	182.946	0.3548	0.887		0.34992	216.15	0	0
0.37908	40.375	0	0		0.37908	116.381	0.388	0.582		0.37908	276.819	0	0		0.37908	199.693	0.0196	0.049		0.37908	207.8	0	0
0.40824	57.978	0	0		0.40824	158.58	1.18933	1.784		0.40824	227.292	0	0		0.40824	218.237	0	0		0.40824	203.991	0	0
0.4374	82.334	0	0		0.4374	210.258	2.74733	4.121		0.4374	188.747	0	0		0.4374	241.135	0	0		0.4374	199.178	0	0
0.46656	115.131	0	0		0.46656	277.041	4.15067	6.226		0.46656	158.922	0	0		0.46656	269.703	0	0		0.46656	192.147	0	0
0.49572	157.405	0	0		0.49572	355.591	4.17733	6.266		0.49572	134.542	0	0		0.49572	301.951	0	0		0.49572	181.331	0	0
0.52487	206.246	0	0		0.52487	440.074	2.694	4.041		0.52487	112.887	0	0		0.52487	332.422	0	0		0.52487	167.751	0	0
0.55403	257.239	0	0		0.55403	521.699	0.889333	1.334		0.55403	91.06	0	0		0.55403	352.603	0	0		0.55403	153.015	0	0
0.58319	299.272	0	0		0.58319	548.052	0.0853333	0.128		0.58319	69.962	0	0		0.58319	351.054	0	0		0.58319	139.475	0	0
0.61235	319.489	0.334	0.835		0.61235	522.038	0	0		0.61235	50.759	0	0		0.61235	322.581	0	0		0.61235	127.609	0	0
0.64151	315.487	2.232	5.58		0.64151	447.6	0	0		0.64151	36.61	0	0		0.64151	269.041	0	0		0.64151	116.944	0	0
0.67067	293.804	8.1196	20.299		0.67067	341.431	0	0		0.67067	29.371	0	0		0.67067	201.624	0	0		0.67067	106.31	0	0
0.69983	262.645	16.0884	40.221		0.69983	232.054	0	0		0.69983	27.887	0	0		0.69983	134.109	0	0		0.69983	96.991	0	0
0.72899	233.011	19.9952	49.988		0.72899	140.289	0	0		0.72899	31.514	0	0		0.72899	76.597	0	0		0.72899	87.091	0	0
0.75815	207.928	18.2612	45.653		0.75815	73.777	0	0		0.75815	40.225	0	0		0.75815	34.217	0	0		0.75815	76.867	0	0
0.78731	190.662	12.6472	31.618		0.78731	31.66	0	0		0.78731	52.326	0	0		0.78731	8.601	0	0		0.78731	66.628	0	0
0.81647	178.591	8.9748	22.437		0.81647	10.771	0	0		0.81647	65.299	0	0		0.81647	0.595	0	0		0.81647	57.385	0	0
0.84563	171.16	6.4212	16.053		0.84563	1.871	0	0		0.84563	73.307	0	0		0.84563	0	0	0		0.84563	50.556	0	0
0.87479	165.882	5.8736	14.684		0.87479	0	0	0		0.87479	71.651	0	0		0.87479	0	0	0		0.87479	45.343	0	0
0.90395	161.727	6.174	15.435		0.90395	0	0	0		0.90395	60.699	0	0		0.90395	0	0	0		0.90395	41.824	0	0
0.93311	157.546	6.9336	17.334		0.93311	0	0	0		0.93311	44.48	0	0		0.93311	0	0	0		0.93311	41.158	0	0
0.96227	151.727	8.0884	20.221		0.96227	0	0	0		0.96227	30.962	0	0		0.96227	0	0	0		0.96227	43.323	0	0
0.99143	145.888	8.5976	21.494		0.99143	0	0	0		0.99143	21.592	0	0		0.99143	0	0	0		0.99143	48.482	0	0
1.02059	134.59	8.6976	21.744		1.02059	0	0	0		1.02059	16.092	0	0		1.02059	0	0	0		1.02059	57.333	0	0
1.04975	120.125	8.2744	20.686		1.04975	0	0	0		1.04975	13.449	0	0		1.04975	0	0	0		1.04975	68.993	0	0
1.07891	103.255	8.1752	20.438		1.07891	0	0	0		1.07891	14.075	0	0		1.07891	0	0	0		1.07891	83.406	0	0
1.10807	84.222	8.5052	21.263		1.10807	0	0	0		1.10807	16.963	0	0		1.10807	0	0	0		1.10807	100.25	0	0
1.13723	68.898	10.4852	26.213		1.13723	0	0	0		1.13723	23.163	0	0		1.13723	0	0	0		1.13723	115.6	0	0
1.16639	56.787	14.8588	37.147		1.16639	0	0	0		1.16639	31.841	0	0		1.16639	0	0	0		1.16639	127.712	0	0
1.19555	50.944	22.496	56.24		1.19555	0	0	0		1.19555	42.263	0	0		1.19555	0	0	0		1.19555	136.548	0	0
1.22471	50.081	37.0644	92.661		1.22471	0	0	0		1.22471	52.129	0	0		1.22471	0	0	0		1.22471	140.35	0	0
1.25387	52.513	58.5064	146.266		1.25387	0	0	0		1.25387	60.617	0	0		1.25387	0	0	0		1.25387	138.855	0	0
1.28303	57.928	86.7504	216.876		1.28303	0	0	0		1.28303	65.503	0	0		1.28303	0	0	0		1.28303	132.128	0	0
1.31219	63.361	115.504	288.759		1.31219	0	0	0		1.31219	71.028	0	0		1.31219	0	0	0		1.31219	119.337	0	0
1.34135	66.13	123.15	307.874		1.34135	0	0	0		1.34135	73.639	0	0		1.34135	0	0	0		1.34135	102.303	0	0
1.37051	65.896	110.32	275.799		1.37051	0	0	0		1.37051	79.979	0	0		1.37051	0	0	0		1.37051	82.476	0	0
1.39967	63.089	79.2512	198.128		1.39967	0	0	0		1.39967	85.258	0	0		1.39967	0	0	0		1.39967	62.618	0	0
1.42883	60.212	46.4596	116.149		1.42883	0	0	0		1.42883	90.458	0	0		1.42883	0	0	0		1.42883	45.33	0	0
1.45799	58.887	23.5108	58.777		1.45799	0	0	0		1.45799	94.601	0	0		1.45799	0	0	0		1.45799	32.434	0	0
1.48715	61.307	10.964	27.41		1.48715	0.26	0	0		1.48715	95.603	0	0		1.48715	0	0	0		1.48715	23.006	0	0
1.5163	67.897	4.5796	11.449		1.5163	1.887	0	0		1.5163	94.811	0	0		1.5163	0	0	0		1.5163	16.4	0	0
1.54546	79.498	1.9464	4.866		1.54546	4.644	0	0		1.54546	96.582	0	0		1.54546	0	0	0		1.54546	12	0	0
1.57462	95.381	0.6548	1.637		1.57462	7.196	0	0		1.57462	100.818	0	0		1.57462	0	0	0		1.57462	9.4	0	0
1.60378	115.264	0.268	0.67		1.60378	10.023	0	0		1.60378	113.367	0	0		1.60378	0	0	0		1.60378	7.667	0	0
1.63294	136.636	0	0		1.63294	12.165	0	0		1.63294	135.449	0	0		1.63294	0	0	0		1.63294	7.027	0	0
1.6621	157.917	0	0		1.6621	12.964	0	0		1.6621	167.369	0	0		1.6621	0	0	0		1.6621	6.611	0	0
1.69126	176.092	0	0		1.69126	13.123	0	0		1.69126	213.341	0	0		1.69126	0	0	0		1.69126	6.492	0	0
1.72042	191.927	0	0		1.72042	11.67	0	0		1.72042	266.726	0	0		1.72042	0	0	0		1.72042	7.052	0	0
1.74958	202.119	0	0		1.74958	9.742	0	0		1.74958	327.868	0	0		1.74958	0	0	0		1.74958	7.846	0	0
1.77874	206.908	0	0		1.77874	7.464	0	0		1.77874	388.346	0	0		1.77874	0	0	0		1.77874	8.138	0	0
1.8079	207.59	0	0		1.8079	5.402	0	0		1.8079	443.085	0	0		1.8079	0	0	0		1.8079	8.089	0	0
1.83706	204.779	0	0		1.83706	3.918	0	0		1.83706	488.84	1.8255	3.651		1.83706	0	0	0		1.83706	7.701	0	0
1.86622	201.459	0.3092	0.773		1.86622	2.605	0	0		1.86622	526.921	20.761	41.522		1.86622	0	0	0		1.86622	6.641	0	0
1.89538	197.458	0.9872	2.468		1.89538	2.03	0	0		1.89538	555.501	77.265	154.53		1.89538	0	0	0		1.89538	5.333	0	0
1.92454	196.493	1.8932	4.733		1.92454	1.234	0	0		1.92454	583.791	196.005	392.01		1.92454	0	0	0		1.92454	3.692	0	0
1.9537	196.607	3.1272	7.818		1.9537	1.144	0	0		1.9537	610.518	422.545	845.089		1.9537	0	0	0		1.9537	2.596	0	0
1.98286	198.971	4.7228	11.807		1.98286	1.206	0	0		1.98286	637.039	686.354	1372.71		1.98286	0	0	0		1.98286	1.263	0	0
2.01202	198.382	5.8592	14.648		2.01202	1.861	0	0		2.01202	656.921	896.234	1792.47		2.01202	0	0	0		2.01202	1	0	0
2.04118	194.498	5.45	13.625		2.04118	2.49	0	0		2.04118	660.45	982.912	1965.82		2.04118	0	0	0		2.04118	1	0	0
2.07034	186.757	4.0608	10.152		2.07034	3.67	0	0		2.07034	651.84	954.361	1908.72		2.07034	0	0	0		2.07034	1	0	0
2.0995	177.474	2.4	6		2.0995	5.144	0	0		2.0995	630.162	804.676	1609.35		2.0995	0	0	0		2.0995	1	0	0
2.12866	166.615	1.4984	3.746		2.12866	6.619	0	0		2.12866	598.606	617.452	1234.9		2.12866	0	0	0		2.12866	1	0	0
2.15782	155.868	0.862	2.155		2.15782	8.622	0	0		2.15782	563.26	426.989	853.978		2.15782	0	0	0		2.15782	1	0	0
2.18698	144.483	0.7092	1.773		2.18698	11.394	0	0		2.18698	524.227	271.222	542.444		2.18698	0	0	0		2.18698	1	0	0
2.21614	130.658	0.82	2.05		2.21614	14.367	0	0		2.21614	481.587	175.75	351.5		2.21614	0	0	0		2.21614	1	0	0
2.2453	113.814	1.1636	2.909		2.2453	17.264	0	0		2.2453	440.547	115.846	231.691		2.2453	0	0	0		2.2453	1	0	0
2.27446	96.124	1.6672	4.168		2.27446	18.156	0	0		2.27446	399.917	73.672	147.344		2.27446	0	0	0		2.27446	1	0	0
2.30362	77.004	2.5536	6.384		2.30362	18.077	0	0		2.30362	367.132	48.607	97.214		2.30362	0	0	0		2.30362	1	0	0
2.33278	64.725	4.2352	10.588		2.33278	15.969	0	0		2.33278	340.965	32.928	65.856		2.33278	0	0	0		2.33278	1	0	0
2.36194	57.465	6.5284	16.321		2.36194	12.5	0	0		2.36194	324.368	20.826	41.652		2.36194	0	0	0		2.36194	1	0	0
2.3911	58.495	10.0008	25.002		2.3911	9.371	0	0		2.3911	317.765	8.71	17.42		2.3911	0	0	0		2.3911	1.594	0	0
2.42026	69.345	14.8428	37.107		2.42026	6.773	0	0		2.42026	319.441	0	0		2.42026	0	0	0		2.42026	1.877	0	0
2.44942	92.15	21.4812	53.703		2.44942	5.361	0	0		2.44942	328.383	0	0		2.44942	0	0	0		2.44942	2.249	0	0
2.47858	128.388	28.91	72.275		2.47858	3.948	0	0		2.47858	340.144	0	0		2.47858	0	0	0		2.47858	3.744	0	0
2.50774	177.812	35.3368	88.342		2.50774	2.464	0	0		2.50774	353.645	0	0		2.50774	0	0	0		2.50774	3.774	0	0
2.53689	228.37	37.4792	93.698		2.53689	0.473	0	0		2.53689	364.256	0	0		2.53689	0	0	0		2.53689	3.647	0	0
2.56605	271.769	37.2864	93.216		2.56605	0	0	0		2.56605	369.861	0	0		2.56605	0	0	0		2.56605	2.489	0	0
2.59521	288.442	34.2892	85.723		2.59521	0	0	0		2.59521	371.168	0	0		2.59521	0	0	0		2.59521	2.312	0	0
2.62437	293.751	32.6496	81.624		2.62437	0	0	0		2.62437	367.711	4.0475	8.095		2.62437	0	0	0		2.62437	2.118	0	0
2.65353	283.263	33.1616	82.904		2.65353	0	0	0		2.65353	360.255	10.8335	21.667		2.65353	0	0	0		2.65353	2	0	0
2.68269	268.265	35.4604	88.651		2.68269	0	0	0		2.68269	349.241	14.174	28.348		2.68269	0	0	0		2.68269	2	0	0
2.71185	246.589	38.4396	96.099		2.71185	0	0	0		2.71185	334.421	16.396	32.792		2.71185	0	0	0		2.71185	2	0	0
2.74101	217.016	40.5196	101.299		2.74101	0	0	0		2.74101	316.76	15.776	31.552		2.74101	0	0	0		2.74101	1.555	0	0
2.77017	178.747	40.8856	102.214		2.77017	0	0	0		2.77017	297.581	13.849	27.698		2.77017	0	0	0		2.77017	1.201	0	0
2.79933	133.024	40.0232	100.058		2.79933	0	0	0		2.79933	279.101	11.8635	23.727		2.79933	0	0	0		2.79933	1	0	0
2.82849	88	38.8	97		2.82849	0	0	0		2.82849	263	9	18		2.82849	0	0	0		2.82849	1	0	0
2.85765	54.784	42.396	105.99		2.85765	0	0	0		2.85765	254.965	5.2925	10.585		2.85765	0	0	0		2.85765	1	0	0
2.88681	32.77	47.0812	117.703		2.88681	0	0	0		2.88681	254.806	1.6165	3.233		2.88681	0	0	0		2.88681	1	0	0
2.91597	20.741	53.9096	134.774		2.91597	0	0	0		2.91597	263.42	0.2035	0.407		2.91597	0	0	0		2.91597	1.235	0	0
2.94513	15.432	55.7856	139.464		2.94513	0	0	0		2.94513	279.514	0	0		2.94513	0	0	0		2.94513	1.855	0	0
2.97429	15.307	50.2928	125.732		2.97429	0	0	0		2.97429	300.614	0	0		2.97429	0	0	0		2.97429	2.373	0	0
3.00345	19.612	38.8368	97.092		3.00345	0	0	0		3.00345	320.811	0	0		3.00345	0	0	0		3.00345	4.554	0	0
3.03261	29.39	24.8292	62.073		3.03261	0.304	0	0		3.03261	339.025	0	0		3.03261	0	0	0		3.03261	8.667	0	0
3.06177	46.931	14.0684	35.171		3.06177	0.544	0	0		3.06177	347.941	0	0		3.06177	0	0	0		3.06177	14.272	0	0
3.09093	69.237	6.576	16.44		3.09093	3.886	0	0		3.09093	349.962	0	0		3.09093	0	0	0		3.09093	21.521	0	0
3.12009	93.091	2.7756	6.939		3.12009	7.849	0	0		3.12009	346.223	0	0		3.12009	1.308	0	0		3.12009	29.39	0	0
3.14925	110.748	1.0664	2.666		3.14925	12.541	0	0		3.14925	339.863	0	0		3.14925	8.953	0	0		3.14925	37.618	0	0
3.17841	112.538	0.3672	0.918		3.17841	18.87	0	0		3.17841	334.161	0	0		3.17841	25.074	0	0		3.17841	44.63	0	0
3.20757	99.293	0.0324	0.081		3.20757	24.271	0	0		3.20757	331.49	0	0		3.20757	47.05	0	0		3.20757	48.85	0	0
3.23673	76.021	0	0		3.23673	30.099	0	0		3.23673	330.055	0	0		3.23673	72.657	0	0		3.23673	50.155	0	0
3.26589	49.983	0	0		3.26589	31.95	0	0		3.26589	331.158	0	0		3.26589	98.183	0	0		3.26589	48.16	0	0
3.29505	27.697	0	0		3.29505	30.653	0	0		3.29505	330.879	0	0		3.29505	117.913	0	0		3.29505	41.507	0	0
3.32421	13.582	0.046	0.115		3.32421	27.435	0	0		3.32421	328.039	0	0		3.32421	129.462	0	0		3.32421	32.439	0	0
3.35337	4.888	0.0108	0.027		3.35337	24.283	0	0		3.35337	321.553	0	0		3.35337	133.231	0	0		3.35337	22.72	0	0
3.38253	1.708	0	0		3.38253	23.759	0	0		3.38253	312.131	0	0		3.38253	132.406	0	0		3.38253	13.866	0	0
3.41169	0.276	0	0		3.41169	26.092	0	0		3.41169	301.054	0	0		3.41169	131.974	0	0		3.41169	6.8	0	0
3.44085	0.577	0	0		3.44085	34.581	0	0		3.44085	291.265	0	0		3.44085	136.722	12.3504	30.876		3.44085	3.497	0	0
3.47001	1.342	0	0		3.47001	53.816	0	0		3.47001	285.886	0	0		3.47001	150.101	77.8604	194.651		3.47001	3.981	0	0
3.49917	3.702	0	0		3.49917	84.466	0	0		3.49917	286.323	0	0		3.49917	175.087	247.615	619.038		3.49917	4.781	0	0
3.52832	8.858	0	0		3.52832	136.608	6.914	10.371		3.52832	293.007	0.4725	0.945		3.52832	214.819	531.602	1329.01		3.52832	5.953	0	0
3.55748	17.141	0	0		3.55748	211.233	101.613	152.419		3.55748	305.952	1.213	2.426		3.55748	270.071	870.629	2176.57		3.55748	7.873	0	0
3.58664	27.862	0.4572	1.143		3.58664	306.903	314.171	471.257		3.58664	321.383	0.612	1.224		3.58664	338.533	1157.19	2892.97		3.58664	17.795	0	0
3.6158	38.214	4.1116	10.279		3.6158	423.358	580.745	871.118		3.6158	342.278	0.104	0.208		3.6158	417.74	1305.85	3264.63		3.6158	41.854	5.8065	11.613
3.64496	47.76	17.1296	42.824		3.64496	550.206	774.147	1161.22		3.64496	361.751	0	0		3.64496	513.928	1287.94	3219.84		3.64496	82.501	39.4055	78.811
3.67412	51.15	50.3852	125.963		3.67412	693.855	837.855	1256.78		3.67412	382.166	0	0		3.67412	630.25	1122.63	2806.58		3.67412	144.464	156.059	312.118
3.70328	51.073	130.779	326.948		3.70328	810.76	765.055	1147.58		3.70328	400.938	0	0		3.70328	745.081	889.413	2223.53		3.70328	229.814	372.725	745.45
3.73244	47.208	280.748	701.871		3.73244	877.761	628.603	942.904		3.73244	417.275	0	0		3.73244	836.007	652.687	1631.72		3.73244	335.695	640.053	1280.11
3.7616	43.488	502.142	1255.35		3.7616	898.653	465.699	698.549		3.7616	434.015	0	0		3.7616	887.698	452.12	1130.3		3.7616	454.956	891.733	1783.47
3.79076	42.578	764.444	1911.11		3.79076	862.034	316.833	475.249		3.79076	446.504	0	0		3.79076	898.819	302.078	755.194		3.79076	574.667	1064.83	2129.67
3.81992	44.094	1019.36	2548.4		3.81992	796.047	190.77	286.155		3.81992	457.741	0	0		3.81992	888.214	198.289	495.722		3.81992	675.713	1079.01	2158.01
3.84908	52.947	1213.36	3033.41		3.84908	718.574	87.9273	131.891		3.84908	468.061	0.2985	0.597		3.84908	860.142	129.458	323.645		3.84908	742.951	966.798	1933.6
3.87824	70.457	1320.74	3301.84		3.87824	641.981	17.0707	25.606		3.87824	475.396	0.463	0.926		3.87824	815.286	84.266	210.665		3.87824	769.739	805.694	1611.39
3.9074	104.018	1332.63	3331.58		3.9074	575.069	0.701333	1.052		3.9074	479.088	0.5	1		3.9074	749.889	53.8536	134.634		3.9074	756.874	631.139	1262.28
3.93656	158.892	1262.19	3155.49		3.93656	519.861	0	0		3.93656	481.625	0.469	0.938		3.93656	673.034	31.284	78.21		3.93656	711.266	461.358	922.716
3.96572	242.741	1141.36	2853.4		3.96572	479.342	0	0		3.96572	478.27	0.1595	0.319		3.96572	594.734	13.5896	33.974		3.96572	643.4	314.17	628.34
3.99488	355.024	1012.49	2531.22		3.99488	447.384	0	0		3.99488	474.812	0	0		3.99488	519.281	2.5948	6.487		3.99488	567.606	193.228	386.456
4.02404	482.199	898.912	2247.28		4.02404	417.588	0	0		4.02404	467.943	0	0		4.02404	452.682	0	0		4.02404	492.821	99.694	199.388
4.0532	605.996	800.765	2001.91		4.0532	390.393	0	0		4.0532	459.536	0.013	0.026		4.0532	393.856	0	0		4.0532	424.412	35.357	70.714
4.08236	711.491	715.608	1789.02		4.08236	365.977	0	0		4.08236	449.926	0	0		4.08236	338.738	0	0		4.08236	365.16	5.489	10.978
4.11152	801.705	638.499	1596.25		4.11152	348.059	0	0		4.11152	438.029	0	0		4.11152	290.476	0	0		4.11152	317.806	0	0
4.14068	865.361	564.559	1411.4		4.14068	337.558	0	0		4.14068	424.835	0	0		4.14068	253.275	0	0		4.14068	282.008	0	0
4.16984	900.669	491.167	1227.92		4.16984	332.436	0	0		4.16984	416.685	0	0		4.16984	228.744	0	0		4.16984	256.667	0	0
4.199	902.642	418.474	1046.19		4.199	332.237	0	0		4.199	409.675	0	0		4.199	218.393	0	0		4.199	239.937	0	0
4.22816	881.537	351.628	879.07		4.22816	334.124	0	0		4.22816	409.647	0	0		4.22816	218.644	0	0		4.22816	228.732	0	0
4.25732	839.475	294.762	736.906		4.25732	334.32	0	0		4.25732	414.404	0	0		4.25732	227.719	0	0		4.25732	221.234	0	0
4.28648	785.392	251.678	629.194		4.28648	331.39	0	0		4.28648	424.052	0	0		4.28648	242.083	0	0		4.28648	215.37	0	0
4.31564	724.825	222.857	557.142		4.31564	323.376	0	0		4.31564	442.082	0	0		4.31564	257.405	0	0		4.31564	210.241	0	0
4.3448	662.411	205.744	514.361		4.3448	307.313	0	0		4.3448	462.557	0	0		4.3448	269.283	0	0		4.3448	206.806	0	0
4.37396	603.423	199.573	498.932		4.37396	286.932	0	0		4.37396	492.728	0	0		4.37396	274.984	0	0		4.37396	205.68	0	0
4.40312	551.499	199.791	499.478		4.40312	262.691	0	0		4.40312	525.893	0	0		4.40312	272.861	0	0		4.40312	207.17	0	0
4.43228	507.833	199.998	499.994		4.43228	239.582	0	0		4.43228	565.654	0	0		4.43228	262.876	0	0		4.43228	212.663	0	0
4.46144	473.395	193.978	484.945		4.46144	220.848	0	0		4.46144	609.293	0	0		4.46144	245.813	0	0		4.46144	221.236	0	0
4.4906	450.845	172.143	430.357		4.4906	206.572	0	0		4.4906	652.466	0	0		4.4906	224.518	0	0		4.4906	233.022	0	0
4.51975	438.63	133.387	333.468		4.51975	202.993	0	0		4.51975	693.47	0	0		4.51975	202.259	0	0		4.51975	246.882	0	0
4.54891	433.918	85.6412	214.103		4.54891	206.478	0	0		4.54891	729.927	0	0		4.54891	184.476	0	0		4.54891	261	0	0
4.57807	434.266	43.438	108.595		4.57807	216.534	0	0		4.57807	757.404	0	0		4.57807	173.982	0	0		4.57807	273.949	0	0
4.60723	433.416	15.7912	39.478		4.60723	234.308	0	0		4.60723	777.53	0	0		4.60723	174.481	0	0		4.60723	285.504	0	0
4.63639	431.933	2.7788	6.947		4.63639	253.439	0	0		4.63639	787.899	0	0		4.63639	187.887	0	0		4.63639	292.968	0	0
4.66555	426.263	0	0		4.66555	271.652	0	0		4.66555	786.925	0	0		4.66555	215.888	0	0		4.66555	297.357	0	0
4.69471	417.741	0	0		4.69471	284.385	0	0		4.69471	777.975	0	0		4.69471	257.091	0	0		4.69471	295.854	0	0
4.72387	405.43	0	0		4.72387	289.77	0	0		4.72387	765.318	0	0		4.72387	310.029	0	0		4.72387	287.421	0	0
4.75303	391.375	0	0		4.75303	288.3	0	0		4.75303	768.494	0	0		4.75303	369.815	0	0		4.75303	272.398	0	0
4.78219	375.755	0	0		4.78219	278.213	0	0		4.78219	797.737	0	0		4.78219	434.612	0	0		4.78219	250.921	0	0
4.81135	360.735	0	0		4.81135	265.539	0	0		4.81135	860.077	0	0		4.81135	516.371	0	0		4.81135	225.343	0	0
4.84051	350.581	0	0		4.84051	252.974	0	0		4.84051	963.669	0	0		4.84051	639.907	1.4604	3.651		4.84051	198.303	0	0
4.86967	347.303	5.8052	14.513		4.86967	244.375	0	0		4.86967	1093.12	0	0		4.86967	764.622	18.394	45.985		4.86967	173.673	0	0
4.89883	359.479	21.9784	54.946		4.89883	247.161	0	0		4.89883	1232.2	0.878	1.756		4.89883	866.867	62.6848	156.712		4.89883	157.164	0	0
4.92799	383.767	49.0696	122.674		4.92799	261.985	0	0		4.92799	1371.45	22.2615	44.523		4.92799	952.718	115.191	287.978		4.92799	149.333	0	0
4.95715	427.849	87.4336	218.584		4.95715	294.426	0	0		4.95715	1483.84	81.7835	163.567		4.95715	1016.8	172.729	431.823		4.95715	152.99	0	0
4.98631	487.293	128.105	320.262		4.98631	351.111	0	0		4.98631	1544.99	184.823	369.646		4.98631	1052.51	236.538	591.345		4.98631	170.88	0	0
5.01547	560.389	162.153	405.383		5.01547	444.51	0	0		5.01547	1489.91	341.8	683.6		5.01547	1051.88	309.943	774.858		5.01547	206.637	0	0
5.04463	642.242	182.338	455.846		5.04463	575.713	0	0		5.04463	1329.31	609.442	1218.88		5.04463	976.082	396.52	991.301		5.04463	264.619	0	0
5.07379	734.963	189.648	474.121		5.07379	743.266	0	0		5.07379	1106.51	1075.02	2150.05		5.07379	823.616	499.006	1247.52		5.07379	344.817	0	0
5.10295	837.573	192.273	480.683		5.10295	920.992	0	0		5.10295	854.896	1561.15	3122.3		5.10295	648.767	618.01	1545.03		5.10295	445.992	8.067	16.134
5.13211	943.021	201.324	503.309		5.13211	1051.97	0	0		5.13211	647.737	1745.77	3491.54		5.13211	496.136	746.69	1866.73		5.13211	562.819	44.3435	88.687
5.16127	1028.86	226.518	566.295		5.16127	1136.07	0	0		5.16127	467.346	1579.59	3159.18		5.16127	383.68	871.589	2178.97		5.16127	685.882	113.621	227.243
5.19043	1101.07	274.24	685.601		5.19043	1165.3	24.9353	37.403		5.19043	314.374	1114.09	2228.18		5.19043	277.405	968.547	2421.37		5.19043	800.351	205.195	410.39
5.21959	1144.14	353.292	883.23		5.21959	1122.49	118.167	177.25		5.21959	199.524	609.051	1218.1		5.21959	188.86	990.468	2476.17		5.21959	886.398	317.836	635.671
5.24875	1155.67	466.268	1165.67		5.24875	928.228	257.059	385.589		5.24875	123.832	290.046	580.093		5.24875	124.184	930.006	2325.01		5.24875	938.462	449.748	899.497
5.27791	1123.84	613.87	1534.67		5.27791	667.447	457.733	686.6		5.27791	84.151	135.536	271.071		5.27791	82.871	793.139	1982.85		5.27791	968.077	598.257	1196.51
5.30707	1038.07	784.575	1961.44		5.30707	418.11	725.079	1087.62		5.30707	67.774	53.3105	106.621		5.30707	61.641	596.345	1490.86		5.30707	971.533	755.2	1510.4
5.33623	893.775	958.698	2396.74		5.33623	229.632	1032.94	1549.41		5.33623	71.18	20.18	40.36		5.33623	53.299	381.29	953.225		5.33623	948.808	921.865	1843.73
5.36539	701.384	1106.35	2765.87		5.36539	98.12	1301.97	1952.95		5.36539	92.082	12.433	24.866		5.36539	54.189	196.615	491.538		5.36539	889.183	1077.6	2155.19
5.39455	511.323	1195.32	2988.29		5.39455	22.834	1400.84	2101.26		5.39455	130.519	23.1065	46.213		5.39455	61.26	76.762	191.905		5.39455	783.424	1158.5	2317.01
5.42371	340.131	1192.69	2981.72		5.42371	0.361	1165.95	1748.92		5.42371	186.651	65.7745	131.549		5.42371	69.513	18.2068	45.517		5.42371	656.355	1141.06	2282.12
5.45287	193.179	1096.35	2740.87		5.45287	0	729.825	1094.74		5.45287	254.513	150.481	300.961		5.45287	74.747	0	0		5.45287	516.859	1026.36	2052.73
5.48203	95.169	918.601	2296.5		5.48203	0	312.447	468.671		5.48203	322.036	241.437	482.874		5.48203	74.206	0	0		5.48203	377.298	861.03	1722.06
5.51119	35.644	698.429	1746.07		5.51119	0	69.3507	104.026		5.51119	366.904	294.396	588.792		5.51119	66.39	0	0		5.51119	247.845	658.348	1316.7
5.54034	6.361	484.958	1212.39		5.54034	0	0	0		5.54034	376.492	261.048	522.095		5.54034	54.51	0	0		5.54034	138.276	419.796	839.592
5.5695	0	312.171	780.427		5.5695	0	0	0		5.5695	347.271	180.619	361.238		5.5695	42.118	0	0		5.5695	56.929	198.809	397.618
5.59866	0	190.853	477.133		5.59866	5.638	0	0		5.59866	291.773	113.65	227.299		5.59866	33.072	0	0		5.59866	10.096	52.53	105.06
5.62782	0	119.645	299.113		5.62782	20.677	0	0		5.62782	227.755	83.8995	167.799		5.62782	27.565	0	0		5.62782	6.846	0	0
5.65698	0	78.4	196		5.65698	43	0	0		5.65698	167	68	136		5.65698	26	0	0		5.65698	3.949	0	0
																				5.68614	2	0	0
