# Supplementary material for: Topological stress triggers persistent DNA lesions in ribosomal DNA with ensuing formation of PML-nucleolar compartment
Source: eLife. 2024 Oct 10;12:RP91304. doi: 10.7554/eLife.91304 (PMC11466457; doi:10.7554/eLife.91304)
Supplement: Figure 4—figure supplement 4—source data 1. [file elife-91304-fig4-figsupp4-data1.xlsx]

## Sheet: Fig.4_FS 4-A
% of annexin V positive cells
biological replicate	1A1_ DMSO	1A11_I-PpoI		1H4_DMSO	1H4_I-PpoI
I	4.04	3.76		4.26	4.28
II	2.385	3.24		3.5	3.635

## Sheet: Fig.4_FS 4-B
CFA_% of recovery
	biological replicate	1A11_mock (DMSO 24 h)	1A11 (I-PpoI 24 h)	1H4_mock (DMSO 24 h)	1H4 (I-PpoI 24 h)
experimental replicate I	I	66	4.925	36.1667	1.375
experimental replicate II	I	62	5.025	32.8333	1.29167
experimental replicate III	I	61	4.65	40.5	1.3
experimental replicate I	II	62	3.925	35.3333	1.325
experimental replicate II	II	61.5	3.675	35.1667	1.0875
experimental replicate III	II	58.5	3.9	27.5	0.941667
experimental replicate I	III	62	3.25
experimental replicate II	III	58	3.075
experimental replicate III	III	56	3.375
