# Supplementary material for: Topological stress triggers persistent DNA lesions in ribosomal DNA with ensuing formation of PML-nucleolar compartment
Source: eLife. 2024 Oct 10;12:RP91304. doi: 10.7554/eLife.91304 (PMC11466457; doi:10.7554/eLife.91304)
Supplement: Figure 4—source data 1. [file elife-91304-fig4-data1.xlsx]

## Sheet: Figure 4D
											according GraphPad
53BP1 foci/nucleus											Freq dist (histogram)
1A11 NT	1A11 1d S+D	1A11 1d WO	1A11 2d WO	1A11 5d WO	1H4 NT	1H4 1d S+D	1H4 1d WO	1H4 2d WO	1H4 5d WO		Bin Center	1A11 NT	1A11 1d S+D	1A11 1d WO	1A11 2d WO	1A11 5d WO	1H4 NT	1H4 1d S+D	1H4 1d WO	1H4 2d WO	1H4 5d WO
0	6	2	2	2	0	5	0	2	3		0	91.6303	6.85841	11.9293	23.9437	33.8947	84.3658	5.57377	13.7221	14.7321	30.3483
0	5	3	1	0	0	5	2	3	1		2	8.19529	26.3274	37.4079	50.7042	57.4737	15.0442	22.9508	42.1955	33.0357	53.068
0	0	2	2	0	1	5	2	3	3		4	0.174368	38.2743	37.1134	19.8944	7.68421	0.58997	40	29.3311	33.7054	13.4328
0	3	4	2	2	0	1	1	4	3		6	0	22.5664	11.0457	4.40141	0.947368	0	24.2623	11.6638	13.8393	2.48756
0	3	0	1	1	0	5	2	5	1		8	0	5.30973	2.35641	0.704225	0	0	5.2459	2.74443	4.01786	0.66335
0	1	1	5	2	0	3	2	5	2		10	0	0.663717	0.147275	0	0	0	1.63934	0.171527	0.446429	0
0	5	1	8	1	0	3	2	1	2		12	0	0	0	0	0	0	0.327869	0.171527	0.223214	0
0	4	4	1	0	0	6	1	2	3		14	0	0	0	0.352113	0	0	0	0	0	0
0	8	1	0	0	1	5	2	2	2
0	8	4	4	1	0	3	0	2	1
0	7	4	1	0	0	3	0	3	5
0	3	4	1	0	1	4	8	0	0
0	5	2	0	0	0	0	1	4	2
0	4	1	0	1	0	2	5	2	1
0	2	2	3	3	0	5	4	3	0
0	1	0	1	0	0	4	2	3	2
0	0	1	4	1	0	4	1	1	2
0	6	3	0	0	0	5	1	2	3
0	3	7	0	1	0	4	3	10	2
0	5	3	3	1	0	5	5	4	4
0	1	6	0	1	0	5	4	2	1
0	5	2	2	2	0	5	3	3	1
0	4	2	3	3	1	3	0	5	1
0	3	3	3	1	0	2	2	0	0
1	4	3	3	1	0	1	0	3	1
0	4	1	2	1	0	5	4	0	0
0	6	1	3	0	0	5	0	7	3
0	4	4	1	0	0	0	1	2	1
0	4	0	0	1	0	4	1	7	0
0	4	3	0	1	0	5	3	4	1
0	3	5	1	2	0	2	1	1	1
0	3	1	1	1	0	1	2	1	1
0	3	1	0	5	0	5	4	1	0
0	5	6	0	1	0	3	3	5	3
0	4	1	0	2	0	3	0	6	1
0	5	1	5	4	0	1	1	5	2
0	3	7	1	1	0	0	3	1	1
0	4	4	1	0	0	10	6	6	1
1	6	4	3	1	0	5	3	2	2
0	5	3	0	2	0	4	2	1	0
0	5	2	1	0	0	7	3	3	2
0	2	3	1	1	1	3	1	3	0
0	1	3	2	0	0	1	0	1	2
0	4	2	2	2	0	3	3	0	2
0	0	4	1	0	0	0	2	0	0
0	4	3	1	1	0	3	4	3	0
0	4	1	3	2	1	4	4	4	0
1	1	1	2	3	0	2	2	1	1
0	3	4	0	1	0	6	1	1	0
0	3	1	0	3	1	3	1	2	2
0	3	3	0	1	0	1	2	7	3
0	5	4	4	4	0	7	1	4	0
0	5	2	3	2	0	2	3	3	0
0	7	1	4	2	0	3	3	4	1
0	3	4	0	1	0	4	2	2	1
0	4	1	3	0	0	4	1	1	2
0	0	0	2	2	0	6	3	0	0
0	3	2	1	0	0	4	2	2	0
0	2	0	0	1	0	2	1	3	2
0	5	4	0	0	1	3	4	5	0
0	3	2	2	0	0	2	2	2	0
0	2	4	1	0	0	1	3	0	1
0	4	3	1	0	0	6	4	5	2
0	4	5	2	0	0	5	2	0	2
0	2	4	1	1	0	3	3	3	0
0	3	2	1	2	0	2	2	2	0
0	3	3	3	1	0	4	2	3	1
1	2	0	2	0	0	5	2	0	2
0	2	4	3	2	0	5	3	5	0
0	1	0	5	0	0	4	2	4	0
0	5	6	1	0	0	9	2	2	0
0	2	1	1	2	1	2	0	6	1
0	6	3	0	3	0	3	3	1	2
0	6	0	5	2	0	3	3	7	1
0	5	4	2	0	1	0	4	1	1
0	3	2	1	2	0	4	2	4	1
0	4	1	3	2	0	5	2	1	1
0	7	3	1	2	0	8	3	1	0
0	3	6	3	6	0	2	6	6	3
0	2	2	1	0	1	6	2	3	0
0	3	3	3	1	0	2	3	1	1
0	6	4	2	0	0	1	2	3	1
1	4	1	0	0	3	5	3	1	1
0	5	3	3	1	0	5	3	2	0
0	3	5	3	0	0	8	4	1	2
0	8	1	4	0	0	2	5	0	0
0	3	4	2	1	0	2	5	4	1
0	1	2	1	3	0	4	3	5	1
0	3	0	2	0	0	3	2	5	0
1	2	0	2	2	0	4	3	3	1
0	0	3	3	0	0	6	4	4	0
0	0	3	1	0	0	5	3	3	0
0	2	0	1	0	0	3	3	6	1
0	4	4	4	2	0	4	5	8	3
0	4	0	2	1	0	3	3	4	0
0	1	3	1	2	0	1	5	3	1
0	2	3	0	2	0	1	4	5	1
0	3	5	1	3	0	1	4	2	2
0	6	2	1	1	0	3	3	0	0
0	3	3	2	1	0	4	2	1	3
0	3	1	1	1	3	4	2	0	2
0	4	2	0	1	0	3	2	1	0
0	3	1	2	3	0	1	2	4	1
0	3	3	2	1	1	2	2	0	0
0	7	4	0	1	0	7	1	5	1
0	2	2	0	1	0	3	7	6	0
0	2	1	2	2	0	5	0	2	1
0	4	0	2	3	0	5	1	7	1
1	5	3	3	0	0	3	1	7	0
0	5	1	3	0	0	3	5	0	3
0	4	3	4	0	0	5	3	4	2
0	4	4	0	1	0	5	5	1	3
0	6	0	1	3	0	4	2	2	0
0	3	5	0	0	0	5	2	5	1
0	4	3	6	1	0	4	3	3	8
0	8	3	1	1	0	3	2	4	1
0	7	2	2	1	1	7	5	3	4
0	2	0	1	0	0	1	3	4	2
0	5	4	5	0	0	5	5	3	2
0	3	2	3	0	1	6	6	1	2
0	6	2	1	2	0	4	2	0	3
0	3	0	0	2	0	0	2	6	2
0	2	1	1	1	1	4	3	4	4
0	6	5	1	0	0	8	3	5	0
0	1	0	1	0	0	4	0	3	0
0	5	3	3	2	1	5	2	4	0
0	2	4	0	1	0	6	1	3	5
0	4	1	1	3	0	1	2	2	0
0	4	3	1	1	0	6	0	2	0
0	7	2	1	2	0	2	2	3	4
0	4	7	2	3	0	3	2	1	0
0	1	3	2	0	0	8	4	2	1
0	6	4	1	0	0	8	0	1	0
0	2	5	0	1	0	5	1	2	0
1	0	3	1	2	0	2	2	4	2
1	5	1	1	0	0	4	0	2	2
0	5	0	5	0	0	6	0	3	1
0	4	3	0	1	0	4	3	0	0
0	0	2	2	2	0	4	2	2	1
0	2	3	3	2	0	1	5	0	1
0	6	3	3	0	0	6	2	1	3
0	9	2	0	0	0	3	1	7	2
0	1	4	2	0	0	4	3	6	0
0	4	3	2	0	1	4	0	0	2
0	5	5	2	0	0	3	3	2	0
0	3	8	0	1	0	3	3	0	0
0	3	1	1	1	0	2	1	3	2
0	5	0	2	2	0	2	6	2	0
0	3	2	1	0	0	5	6	0	0
0	3	3	2	0	0	8	2	0	0
0	0	1	3	0	0	0	0	5	1
0	0	3	2	0	1	2	8	5	1
0	1	1	1	0	0	3	3	5	0
0	5	0	1	2	0	2	1	2	1
0	6	3	2	1	0	4	2	0	2
0	6	1	0	0	0	3	3	2	0
1	3	6	0	0	0	0	1	1	4
0	5	1	2	1	1	1	2	1	1
0	3	9	1	2	0	3	3	1	2
0	6	2	0	2	0	5	3	3	4
0	2	3	1	2	0	2	0	1	1
0	1	4	1	0	0	3	4	2	2
0	1	0	2	0	0	3	0	0	2
0	7	2	2	0	1	4	1	4	1
0	6	3	0	0	0	6	3	2	0
0	1	0	0	0	0	0	5	0	2
0	2	2	0	0	0	4	0	0	2
0	1	4	0	0	0	2	3	0	1
0	1	3	1	2	0	4	3	0	2
0	4	1	2	0	1	2	0	4	3
0	1	1	0	0	0	4	2	4	1
0	8	3	4	0	0	8	1	0	0
0	3	2	1	2	1	3	3	0	0
0	9	5	2	0	0	4	2	2	0
0	6	1	0	2	0	5	0	6	3
0	4	3	3	2	0	4	1	0	1
0	2	5	1	0	0	1	2	3	3
0	6	3	2	0	0	4	4	2	1
0	3	4	3	1	0	9	2	4	2
0	4	1	2	2	0	5	1	2	0
0	5	5	3	1	0	6	0	4	1
0	3	1	3	2	1	4	3	3	3
1	3	0	2	2	0	4	0	2	0
0	3	6	0	0	0	6	2	1	1
0	5	1	1	0	0	0	2	2	1
0	1	6	0	0	0	7	3	2	0
0	2	3	0	0	0	4	0	4	1
0	2	2	1	2	0	2	2	3	2
0	2	0	1	1	0	4	3	5	2
0	5	3	0	1	3	4	0	7	2
2	2	3	2	2	0	3	0	1	2
0	0	2	0	2	0	6	2	4	0
0	4	3	3	2	0	1	1	0	5
0	2	0	3	2	1	2	0	4	1
0	3	3	3	1	0	5	3	1	1
0	4	0	1	0	0	6	0	0	0
0	3	5	1	1	1	4	2	3	1
0	6	5	1	2	0	2	2	1	1
0	6	1	4	1	0	6	1	2	4
0	0	1	1	4	0	4	1	5	2
0	2	4	0	0	0	3	0	3	2
0	2	0	3	2	0	4	2	5	2
0	2	1	0	1	0	2	7	7	0
0	3	2	0	1	0	4	4	3	2
0	2	2	0	0	2	2	2	1	2
0	1	1	2	1	1	1	2	4	2
0	2	1	2	1	0	4	4	3	1
1	4	0	1	2	0	4	2	0	0
0	3	6	0	1	0	7	2	5	2
0	5	1	2	2	0	4	2	1	1
0	5	3	1	2	2	1	3	6	0
0	1	2	2	0	0	3	0	3	1
0	6	2	2	0	0	3	6	6	0
0	6	3	2	1	0	4	5	2	1
0	2	5	3	3	0	3	5	0	4
0	6	2	2	0	0	4	3	4	1
0	4	1	2	1	0	5	5	0	2
0	1	4	1	1	0	1	4	6	1
0	2	2	1	2	0	5	3	3	0
0	1	2	0	2	0	2	5	2	0
0	7	4	0	2	0	6	3	3	1
0	5	3	3	2	0	1	0	0	1
1	6	4	0	1	0	5	2	2	1
0	6	4	2	2	0	5	3	1	0
0	2	2	0	2	0	9	1	2	5
0	4	2	5	1	0	0	1	3	3
0	2	1	2	5	0	4	5	2	2
0	0	2	1	1	0	5	1	7	1
0	4	5	3	0	0	3	6	3	3
0	2	2	0	3	0	3	7	6	1
0	2	2	1	0	1	2	5	5	0
0	6	3	1	2	1	0	5	0	5
0	3	8	2	1	0	2	2	4	0
0	9	2	0	0	0	3	2	3	0
0	3	3	2	2	0	3	6	0	0
0	4	0	0	2	0	3	3	7	0
0	3	5	3	0	0	1	6	2	1
0	4	6	1	2	1	3	1	5	0
0	0	3	0	2	0	2	5	1	2
0	4	2	0	2	1	7	0	1	1
0	4	2	0	0	0	2	0	3	1
0	1	1	0	1	0	5	0	4	1
0	4	5	3	1	0	5	0	3	3
0	4	4	3	3	0	5	2	2	1
0	3	2	1	0	0	4	3	1	1
0	8	4	0	1	1	0	1	4	0
0	2	3	3	0	0	3	4	0	0
0	0	3	1	0	0	2	6	2	5
0	5	4	5	1	0	1	1	2	1
0	2	4	4	0	1	0	0	5	1
0	1	5	1	0	0	0	4	2	2
1	5	3	0	1	0	2	0	1	0
0	2	5	5	1	0	3	3	1	2
0	0	2	1	1	0	4	0	3	0
0	5	3	1	2	0	6	4	4	4
0	5	1	0	2	0	4	2	2	1
0	6	2	8	4	0	5	4	2	0
0	4	2	0	1	0	0	3	5	1
0	0	4	2	0	0	5	4	0	2
0	3	1	1	1	0	4	0	6	0
0	2	3	1	0	0	4	5	3	0
0	4	5	0	1	0	5	4	4	0
0	1	2	1	1	0	2	0	0	0
0	3	2	1	2	0	1	0	0	4
0	5	1	2	1	0	7	3	2	2
0	4	1	2	0	0	6	2	2	0
0	5	7	2	3	0	3	3	4	0
0	6	1	0	2	0	4	4	5	2
0	3	4	1	0	0	6	7	2	1
1	2	2	1	2	1	7	3	4	3
1	4	3	3	1	0	2	0	4	1
0	6	3	1	0	0	4	3	1	1
0	3	3	4	0	0	1	5	2	0
0	3	5	2	1	0	6	6	5	0
0	6	2	5	1	0	5	2	1	3
0	1	2	4	1	0	3	5	2	2
1	7	7	2	1	0	5	3	4	3
0	4	2	2	3	0	10	4	1	5
0	6	6	2	0	1	3	0	2	2
0	5	1	4	3	1	11	2	1	2
0	4	0	3	1	0	4	1	1	0
0	6	7	2	1	0	1	2	0	0
0	1	2	6	1	0	4	2	5	2
0	3	0	1	0	0	3	3	8	0
0	6	3	1	1	0	4	1	5	0
0	2	1	1	2	0	3	0	8	2
0	4	4	1	1	0	1	2	2	4
0	4	3	0	0	0	1	0	4	1
0	4	1	0	1	0	4	2	1	0
0	0	3	1	0	0	3	1	3	3
0	0	1	2	1	1	3	6	0	2
0	4	4	2	2	1	4	2	5	1
0	4	4	1	2	1	5	2	2	0
0	1	2	3	0	0	3	4	4	3
0	1	3	0	0	0	4	7	3	1
0	5	5	2	3	2	5	0	2	1
0	0	3	2	2	0	1	0	3	2
0	2	3	3	1	1	3	1	6	2
0	1	3	5	1	0	0	1	3	4
0	5	6	2	1	1	6	5	3	1
0	4	2	1	3	0	1	3	2	3
0	4	0	0	1	0	2	2	0	3
2	4	2	0	0	0	4	1	3	0
0	0	2	4	2	0	5	2	4	3
0	1	4	0	1	0	1	2	2	1
0	1	3	1	2	0		3	0	0
0	0	2	3	2	0		0	5	2
0	2	0	1	2	0		4	3	0
0	2	1	6	0	0		5	6	1
0	1	3	0	1	0		5	3	0
0	2	4	3	2	0		2	4	2
0	2	3	3	0	0		1	4	3
0	3	2	1	2	0		0	2	0
0	6	0	2	0	0		5	1	1
0	0	5	2	1	0		2	5	0
0	5	5	1	1	1		0	3	0
0	1	2	0	1	0		2	4	0
0	4	3	1	1	1		2	2	1
0	0	2	4	1	0		2	2	0
0	0	3	3	1	0		2	4	0
0	7	3	2	0	1		3	2	0
0	2	2	2	2	0		2	0	0
0	0	2	0	2	0		3	2	0
1	8	6	1	4	1		1	3	4
0	2	3	1	1	0		3	2	1
0	3	4	7	1	0		2	5	0
0	4	1	2	0	0		7	4	6
0	2	1	5	2	0		3	3	3
0	5	4	0	2	0		1	7	2
4	3	4	1	1	2		4	3	2
0	3	4	3	1	0		3	0	3
0	5	1	2	1	1		2	4	2
0	4	3	1	1	0		4	1	1
0	0	1	13	0	0		2	6	3
0	4	0	1	3	0		5	1	1
0	1	1	4	2	0		0	2	4
0	4	5	5	0	0		1	0	0
0	3	2	5	1	0		1	0	2
0	5	3	2	1	0		1	4	0
0	3	3	1	0	0		2	3	0
0	3	5	2	0	0		0	0	3
0	5	2	0	1	0		1	1	1
0	1	4	4	1	0		3	3	4
0	2	2	2	0	0		1	3	0
0	2	2	0	0	0		0	11	1
0	6	0	0	1	0		1	3	3
1	1	1	1	1	0		1	3	0
0	3	1	3	0	1		4	1	3
0	2	6	3	0	0		1	3	1
0	2	2	2	0	0		2	2	0
1	2	1	2	0	0		0	2	2
0	2	5	2	1	0		3	5	2
0	5	4	4	0	2		1	5	1
0	0	3	2	1	0		2	4	3
2	4	4	2	0	0		1	0	0
0	1	1	1	1	0		2	3	2
0	3	0	2	1	1		4	5	1
0	2	3	2	3	0		2	4	1
0	3	3	2	3	0		2	9	0
0	4	0	3	2	0		3	6	4
0	1	3	1	1	0		1	2	3
0	4	2	0	2	0		1	4	0
0	8	3	1	1	0		1	4	0
1	5	3	0	1	0		2	6	2
0	3	4	1	2	0		2	1	6
0	3	1	0	1	0		2	3	0
0	5	5	1	0	0		2	1	2
0	4	2	1	0	1		2	3	0
0	2	0	3	0	1		1	0	2
0	3	1	2	1	0		6	0	2
0	3	2	2	0	0		0	3	0
0	0	3	0	1	0		0	1	0
1	3	2	2	2	0		5	3	0
0	7	2	2	0	0		1	2	3
0	5	2	1	2	0		5	1	0
1	6	0	3	1	0		1	1	1
2	5	3	0	0	0		0	6	0
0	3	1	4	1	0		1	2	4
0	8	0	1	1	0		2	4	0
0	4	0	2	1	0		1	2	0
0	1	8	2	2	0		3	6	1
0	3	3	5	1	0		4	2	2
0	5	3	4	0	0		8	0	0
0	5	5	0	0	0		1	3	0
0	3	3	1	1	1		6	8	2
0	6	2	1	0	0		2	3	1
0	4	4	2	1	0		2	3	0
0	3	0	0	2	0		6	3	0
0	3	3	1	1	0		1	2	0
0	1	4	3	0	0		1	2	1
0	3	2	2	0	0		4	4	0
0	3	2	2	1	2		5	2	0
1	5	3	0	3	1		1	4	1
0	8	2	3	0	0		5	4	1
0	5	3	1	5	0		0	2	3
0	3	3	0	0	1		2	4	0
0	4	4	3	0	0		1	3	2
0	1	2	0	1	0		1	5	1
1	1	4	0	0	1		1	0	3
0	2	3	0	0	0		4	4	2
0	4	1	1	2	0		2	2	2
0	4	2	0	0	0		4	4	1
0	6	2	2	1	1		3	1	1
0	1	1	0	0	0		3	3	1
0	5	4	1	2	0		2	5	2
0	4	1	0	2	0		1	3	2
0	3	5	1	1	1		0	2	1
0	6	2	0	0	0		0	3	2
0	3	2	1	0	0		0	2	0
0	3	4	1	1	1		0	3	0
1	1	3	2	0	0		2	6	2
0	5	3	0	1	0		6	3	1
0	2	2	3	1	1		9	2	2
0	5	1	2	0	1		3	2	1
0	3	3	0	2	0		0	0	1
0	8	4	1	2	0		0	0	2
2	6	3	2	2	0		5	3	2
0	0	4	2	0	0		2	0	1
0	6	5	2	2	0		2	3	1
0	5	3	0	0	0		1	0	0
0	4	0	3	1	0		1	3	1
0	8	4	2	0	0		7	0	1
0	2	0	3	0	0		2	4	5
0	2	8	2	2	0		5	3	2
0	3	4	1	0	0		2	0	3
0	2	4	1	2	0		4	3	2
0	2	1	0	1	0		1	3	0
0	2	4	0	0	0		3	2	2
0	4	3	1	2	0		3	4	0
0	4	2	1	1	1		3	1	0
1	6	2	2	0	0		0	5	2
1	3	3	1	2	1		1	3	0
0	2	3	1	0	0		4	7	1
0	3	0	1	1	0		4	0	0
0	4	2	4	0	0		2	5	1
0	4	2	2	0	0		1	3	1
2	1	1	1	0	0		4	0	0
0	5	1	0	2	0		5	0	1
0	3	1	2	1	0		2	7	1
0	2	4	0	0	0		4	4	1
0	2	3	2	0	0		2	3	0
0	4	2	13	3	0		5	1	0
0	3	5	1	1	0		0	3	1
0	4	3	2	2	0		0	0	2
0	7	4	0	0	0		0	1	1
0	1	1	3	1	0		0	2	2
0	0	5	3	2	1		1	3	2
0	3	1	5	2	0		8	2	1
0	2	2	4	2	0		2		1
0	3	3	0	2	0		1		2
0	3	0	4	2	1		1		0
0	4	3	3	0	1		5		2
0		0	3	0	0		2		0
0		4	3	0	0		3		1
0		3	1	0	0		3		0
0		1	4	1	0		3		2
0		0	1	2	0		3		1
0		7	0	2	0		2		1
0		0	3	0	0		1		1
0		2	0	0	0		2		2
0		2	0	0	0		3		2
0		0	3	2	0		4		0
0		1	2	2	1		3		1
1		4	1	2	1		3		2
0		3	2	1	0		3		1
0		3	0	1	0		4		1
0		2	1	0	0		5		2
0		1	7	3	0		1		2
0		1	2	0	0		4		1
0		3	2	2	0		3		2
0		2	0	1	0		4		2
0		1	3	0	0		1		0
0		4	3	3	0		2		0
0		0	2	1	0		3		2
1		2	3	1	0		2		0
0		1	1	1	0		3		0
1		3	4	2	0		4		1
0		4	3	3	0		5		4
0		1	2	1	0		5		0
0		4	0	1	0		2		3
0		3	0	2	0		5		2
0		5	3	0	0		2		2
0		3	1	0	0		5		0
0		5	4	1	0		2		2
0		3	0	2	0		1		3
0		5	0	0	0		2		2
0		0	2	0	0		2		0
0		0	0	3	1		3		2
0		4	1	0	0		1		1
0		3	2	0	0		2		1
0		2	2	1	0		4		2
1		6	5	0	0		4		0
0		4	1	2	0		7		1
0		4	3	1	0		3		1
0		1	0	1	0		4		3
0		0	1	2	0		1		2
1		3	4	1	1		2		2
0		0	1	0	0		2		1
0		2	0	5	0		1		0
0		7	3	1	2		7		0
0		4	0	2	0		3		1
0		2	1	3	3		2		1
0		2	0	2	0		3		4
0		0	0	0	0		2		7
0		5	1	0	0		7		3
0		5	1	1	0		4		2
0		2	0	3	0		3		3
0		2	1	2	0		5		4
0		7	1	0	1		2		2
0		2	2	2	0		1		2
0		3	3	1	0		1		6
0		4	1	1	0		0		1
0		3	0	2	0		3		0
0		0	2	1	1		4		0
0		6	0	0	0		5		0
0		3	1	0	0		0		1
0		0	3	2	0		2		0
0		1	0	0	0		3		0
4		0	0	1	0		4		1
0		7	6	2	1		0		8
0		4	0	2	0		2		5
0		3	2	2	1		0		1
0		0	2	1	0		3		3
0		5	3	1	1		6		1
0		0	1	2	0		6		1
0		6	3	1	0		3		5
0		4	1	2	0		2		1
0		2	5	1	0		2		3
0		4	1	0	0		2		3
0		0	2	0	1		3		4
0		6	0	0	0		2		1
0		2	1	1	0		1		2
0		4	0	0	0		1		2
0		1	1	0	0		2		3
0		4	1	0	0		0		3
0		1	2	1	0		4		1
0		2	4	1	0		7		1
0		2	1	3	0		1		1
0		1	5	0	0		11		0
0		5	0	0	0		5		0
0		4	5	1	0		2		2
0		4	0	0	0		3		3
0		0	2	4	2		4		0
0		1	0	2	1		1		5
0		5	4	1	0		1		1
0		2	5	0	1		3		1
0		4	2	1	0		5		2
0		2	3	1	0		4		0
0		2	1	2	0		6		1
0		2	3	1	1		5		7
0		3	4	1	0		1		4
0		6	1	3	0		6		1
0		1	0	2	0		0		2
0		3	3	0	0		1		1
0		3	0	2	0		4		1
1		5	1	1	0		3		2
0		0	1	0	0		2		3
0		2	4	2	1		3		2
0		2	0	1	0		2		1
0		6	3	1	0		0		0
0		3	2	3	0		3		1
0		3	0	2	1		2		3
0		4	1	0	0		1		1
0		5	1	0	1		0		0
0		0	1	2	0		2		1
1		1	1	3	0		3		1
0		3	1	1	0		3		2
0		0	2	2	0		7		1
0		0		0	0		0		3
0		3		2	0		3		1
0		6		0	0		4		2
0		1		3	0		0		1
0		3		2	0		3		0
0		0		0	0		3		2
0		0		0	0		1		2
0		0		2	1		5		2
0		4		2	1		1		2
0		1		3	0		2		3
0		0		2	0		3		0
0		2		1	0		3		1
0		3		2	0		4		1
0		2		1	0		2		0
1		2		1	0		2		1
0		2		1	0				1
1		4		0	0				4
1		4		1	0				0
0		4		0	0				0
0		5		1	0				0
0		2		1	0				1
0		2		1	0				0
0		3		0	0				1
0		3		2	0				1
0		4		2	0				2
0		2		0	1				1
0		1		1	0				5
0		4		1	1				1
0		1		0	0				0
1		4		1	0				2
1		0		0	0				0
0		5		1	0				1
0		3		2	1				0
0		5		0	0				0
0		4		3	0				1
0		2		1	0
0		0		2	0
0		5		2	0
0		3		1	0
0		7		1	0
0		3		4	0
0		3		1	0
0		4		0	1
0		3		0	0
0		4		2	0
0		5		2	0
0		6		3	0
0		2		0	0
0		5		3	0
1		1		2	0
0		3		2	1
1		5		3	1
0		1		1	0
0		4		2	1
0		0		1	0
0		2		0	0
1		0		0	0
0		1		3	0
0		4		0	0
0		2		1	1
0		3		4	0
0		2		1	0
0		1		0	0
0		3		0	0
0		2		1	0
0		2		2	2
0		1		2	0
0		2		0	0
0		6		1	0
0		1		0	0
0		3		2	0
0		2		0	0
0		4		1	0
0		1		2	0
1		2		1	0
0		0		0	0
0		0		1	1
0		1		2	0
0		0		1	0
0		3		0	0
0		2		5	0
0		2		2	0
0		7		1	0
0		3		0	0
0		0		1	1
1		3		1	1
0		1		2	1
0		0		3	0
1		2		2	1
0		2		0	0
0		2		1	1
0		2		0	0
0		5		2	0
0		4		0	0
0		2		2	0
0		4		0	0
0		2		1	0
0		2		0	1
1		2		0	0
0		3		1	0
0		3		0	1
0		1		0	1
1		2		0	0
0		4		0	0
0		5		1	0
0		3		2	0
0		1		1	0
1		2		2	1
0		4		0	1
0		4		0	0
0		5		1	0
0				0	0
0				1	0
0				0	0
0				2	0
1				1	1
0				0	0
0				3	1
0				0	0
0				2	2
0				0	0
0				1	1
0				1	1
1				0	0
0				2	0
0				2	0
0				1	0
0				1	0
0				3	0
0				0	0
0				2	0
0				2	0
0				1	0
0				1	0
0				2	0
0				2	2
0				2	0
0				1	0
0				3	0
0				1	0
0				2	0
0				1	0
0				6	0
1				2	0
1				1	0
0				1	0
0				2	0
0				1	0
0				0	0
0				2	0
0				2	1
0				0	0
0				1	0
0				2	0
0				0	0
0				1	0
0				3	0
0				2	1
0				1	0
1				1	0
0				0	0
0				1	0
0				1	1
0				1	0
0				0	0
0				0	0
0				1	0
0				1	0
0				0	0
0				0	0
0				0	0
0				3	0
0				2	0
0				1	0
0				1	0
0				0	0
0				3	0
0				0	0
0				1	0
0				4	0
0				0	0
0				1	0
1				0	0
0				2	0
0				1	0
0				1	1
0				1	0
0				1	1
0				2	0
1				0	0
0				4	1
0				1	0
0				2	0
0				2	1
0				2	0
0				2	0
0				0	0
0				2	0
0				0	0
0				0	0
1				0	0
0				0	0
1				0	0
0				3	0
0				2	0
0				0	0
0				0	0
0				1	0
0				4	0
0				2	0
0				0	0
0				2	2
0				5	1
0				1	1
0				1	0
0				1	0
0				2	0
0				1	0
0				2	0
0				1	0
0				1	0
0				1	0
0				3	0
0				0	0
0				0	0
0				1	0
0				2	0
0				0	0
0				1	1
0				1	1
0				1	0
0				2	0
0				1	0
0				1	0
0				2	0
0				0	0
0				0	0
0				1	0
0				0	0
0				2	0
0				0	0
0				0	0
0				0	0
0				1	0
0				2	0
0				2	0
0				1	0
0				1	1
0				2	0
0				2	0
0				1	0
0				1	0
0				0	0
1				0	0
0				1	0
0				1	0
0				1	0
0				0	0
0				1	0
0				2	0
0				1	0
0				0	0
0				0	0
1				1	0
0				0	0
0				1	0
0				1	0
0				0	0
0				1	0
0				0	0
0				0	0
0				1	0
1				3	2
0				2	0
0				0	0
1				0	0
1				1	0
0				3	0
0				3	2
0				2	0
0				0	0
0				0	0
0				0	0
0				2	0
0				3	0
0				3	0
0				1	1
0				1	0
1				1	0
0				3	1
0				0	0
0				1	0
0				2	0
0				1	0
0				0	0
0				0	0
0				0	0
0				0	0
0				1	3
0				1	0
0				2	0
0				1	0
0				2	0
0				1	0
0				0	0
0				2	0
0				0	0
0				1	0
1				5	0
0				0	0
0				2	0
0				2	0
0				1	0
0				2	0
0				1	0
0				3	0
1				0	1
0				3	0
0				2	0
0				1	0
0				1	0
0				0	0
1				1	0
0				1	0
0				0	0
0				1	0
0				0	0
0				1	1
0				0	0
1				2	0
0				0	0
0				0	1
0				2	0
0				2	0
0				0	0
0				1	0
0				1	0
0				0	0
0				0	0
0				1	0
0				0	0
1				0	0
0				0	0
0				2	0
0				2	0
0				2	1
0				2	0
0				0	0
0				0	1
0				0	1
0				0	0
0				0	0
0				2	0
0				0	0
0				1	0
0				0	0
0				1	0
0				2	0
0				2	0
0				1	0
0				1	1
1				1	3
0				1	1
0				0	0
0				1	0
0				1	0
0				0	0
0				1	0
0				2	0
0				3	0
0				3	0
0				0	0
0				1	0
0				1	0
0				3	0
0				0	0
0				0	0
0				0	0
0				1	0
1				0	0
0				1	0
0				2	0
0					0
0					1
0					0
0					0
0					0
0					0
0					1
0					0
0					0
0					0
0					0
1					0
0					0
0					0
0					0
0					1
0					0
1					0
0					0
0					0
0					0
0					0
1					0
0					0
0					0
0					0
0					0
0					0
0					0
0					0
0					0
0					0
0					0
0					0
0					0
0					0
0					0
0					1
0					0
0					0
0					1
0					0
1					0
0					0
0					0
0					1
0					1
1					0
0					0
0					0
1					0
1					1
0					0
0					0
0					1
0					1
0					0
0					0
0					0
0					1
0					0
1					0
0					0
0					1
0					0
0					0
0					1
0
0
0
0
0
0
0
0
0
0
0
0
0
0
0
0
0
0
0
0
0
0
0
0
0
0
0
0
0
0
0
0
0
0
0
1
0
0
0
0
0
0
0
0
0
0
0
0
0
0
0
1
0
0
0
0
0
0
0
0
0
0
0
0
0
0
0
0
0
0
0
0
1
0
0
0
0
0
0
0
0
0
0
0
0
0
0
0
0
2
1
0
0
0
0
1
0
0
0
0
0
0
0
0
0
0
0
0
0
0
0
0
0
0
0
0
0
1
0
0
0
1
0
0
0
1
0
0
0
0

## Sheet: Figure 4E
1A11 % nuclei with PNas							1H4 % nuclei with PNas
biological replicate	S+D 24h	S+D 24h R	S+D 48h R	S+D 5d R	NT		biological replicate	S+D 24h	S+D 24h WO	S+D 48h WO	S+D 5d WO	NT
I	4.92308	5.39682	4.91803	5.49451	0		I	7.46753	10.5431	9.41558		0
II	6.27063	8.66667	6.47249		0		II	13.6667	14.4781	17.6101	13.125	0
III	8.03858	8.75421	14.7059	8.46395	0		III	9.30233	9.9359	9.699	10.7143	0
IV	18.4211	13.0435	17.2727	6.12903	0
* S+D_Shield +doxycyclin (24 h)
