# Supplementary material for: Topological stress triggers persistent DNA lesions in ribosomal DNA with ensuing formation of PML-nucleolar compartment
Source: eLife. 2024 Oct 10;12:RP91304. doi: 10.7554/eLife.91304 (PMC11466457; doi:10.7554/eLife.91304)
Supplement: Figure 5—figure supplement 1—source data 3. [file elife-91304-fig5-figsupp1-data3.xlsx]

## Sheet: Figure5_FS  1-A
WB_detection of phosphorylated p53 (p53phosphoS15) after ATM/ATR inhibition
	log2		DOXO 4h	DOXO 55 4h	DOXO 600 4h	DOXO 24h	DOXO 55 24h	DOXO 600 24h		DOXO 4h	DOXO 822 4h	DOXO 24h	DOXO 822 24h
		I	0	-0.877974	-3.09616
		II	0	-1.00306	-2.02305	0	-0.411559	-2.15261
		III	0	-1.12319	-1.79522	0	0.226102	-1.03806		0	-0.56212	0	-1.7147
		IV	0	-0.642028	-0.530813	0	-1.93482	-1.49491		0	-0.17642	0	-0.48888
	FCH		DOXO 4h	DOXO 55 4h	DOXO 600 4h	DOXO 24h	DOXO 55 24h	DOXO 600 24h		DOXO 4h	DOXO 822 4h	DOXO 24h	DOXO 822 24h
		I	1	0.544131	0.11694
		II	1	0.498941	0.246038	1	0.751811	0.224905
		III	1	0.459077	0.288128	1	1.16967	0.486983		1	0.677305	1	0.304665
		IV	1	0.640812	0.692164	1	0.261554	0.354803		1	0.884896	1	0.712578
	p53P/GAPDH		DOXO 4h	DOXO 55 4h	DOXO 600 4h	DOXO 24h	DOXO 55 24h	DOXO 600 24h		DOXO 4h	DOXO 822 4h	DOXO 24h	DOXO 822 24h
		I	2.21651	1.20607	0.259199
		II	1.16511	0.58132	0.286661	0.453623	3.55876	4.72051
		III	0.101316	0.0465117	0.0291919	2.54169	2.97294	1.23776		0.106205	0.071933	2.20378	0.671416
		IV	0.853227	0.546758	0.590573	3.21619	0.841206	1.14111		0.757136	0.669987	1.22012	0.869433

## Sheet: Figure5_FS 1-B
1A11_concatenated	Number of 53BP1 foci in nucleus_I-PpoI + inhibitors of DNA repair pathways																	GraphPad
S+D 0d WO	S+D 1d WO	S+D 2d WO	S+D 5d WO	S+D DNAPKi 0d WO	S+D DNAPKi 1d WO	S+D DNAPKi 2d WO	S+D DNAPKi 5d WO	S+D BO2 0d WO	S+D BO2 1d WO	S+D BO2 2d WO	S+D BO2 5d WO	S+D DNAPKi BO2 0d WO	S+D DNAPKi BO2 1d WO	S+D DNAPKi BO2 2d WO	S+D DNAPKi BO2 5d WO			Freq_dist_%_(histogram)
2	4	1	2	2	0	3	0	3	3	1	0	6	1	1	0
0	3	2	0	6	2	0	0	3	4	2	1	4	0	3	0
0	0	2	1	2	3	1	1	3	1	4	0	3	1	2	0			Bin Center	S+D 0d WO	S+D 1d WO	S+D 2d WO	S+D 5d WO	S+D DNAPKi 0d WO	S+D DNAPKi 1d WO	S+D DNAPKi 2d WO	S+D DNAPKi 5d WO	S+D BO2 0d WO	S+D BO2 1d WO	S+D BO2 2d WO	S+D BO2 5d WO	S+D DNAPKi BO2 0d WO	S+D DNAPKi BO2 1d WO	S+D DNAPKi BO2 2d WO	S+D DNAPKi BO2 5d WO
0	0	1	0	5	6	4	0	1	3	1	0	5	3	3	0			0	14.4683	21.3933	29.9657	41.0448	2.35405	12.3991	13.3379	25.7991	30.4134	36.3932	43.143	40.9272	6.63655	17.6807	25.9278	29.1765
7	3	3	0	13	7	0	4	1	3	3	1	6	2	2	1			2	32.6876	42.0187	44.6054	44.4918	10.7345	34.3943	32.2737	37.8425	42.2244	43.0544	43.2885	45.3097	23.0021	40.2205	43.9318	47.0588
5	9	3	0	5	1	2	0	4	0	1	0	7	2	5	3			4	29.1014	25.6171	19.5959	11.5494	23.0697	32.5891	28.4727	22.6027	19.2585	16.3688	11.677	10.9381	29.0827	28.6239	23.4704	18.8235
0	1	1	5	8	0	1	1	2	1	2	1	5	3	1	4			6	17.3124	9.21558	4.72741	2.38095	32.8154	14.4418	14.9965	9.13242	6.20079	3.69618	1.74609	2.28178	25.5038	11.2699	5.4664	4.31372
1	4	3	1	11	3	5	1	2	1	0	2	7	2	2	6			8	5.11129	1.59078	0.914983	0.426439	20.9981	4.56057	7.46372	2.56849	1.67323	0.446791	0.109131	0.398406	12.196	1.55165	0.952859	0.470588
3	4	3	2	9	2	3	2	1	3	1	0	4	4	0	1			10	0.948063	0.109709	0.190621	0.0710732	7.29755	0.950119	2.4188	1.08448	0.229659	0.0406174	0.0363769	0.108656	2.67547	0.40833	0.250752	0.117647
2	0	3	1	9	0	4	3	8	0	3	0	6	0	9	0			12	0.288541	0.0548546	0	0.0355366	1.9774	0.380047	0.552868	0.399543	0	0	0	0.0362188	0.660181	0.163332	0	0.0392157
2	5	2	0	8	3	2	3	1	3	1	0	6	3	2	1			14	0.0412201	0	0	0	0.376648	0.0475059	0.138217	0.22831	0	0	0	0	0.104239	0.040833	0	0
4	1	1	4	8	0	2	0	6	1	0	1	4	5	5	0			16	0.0412201	0	0	0	0.235405	0.0475059	0.138217	0.171233	0	0	0	0	0.0694927	0	0	0
0	3	0	0	7	0	3	0	1	0	0	0	4	0	1	5			18	0	0	0	0	0.141243	0.0475059	0.0691085	0	0	0	0	0	0	0	0	0
2	2	1	2	5	5	2	2	2	2	0	0	10	2	0	5			20	0	0	0	0	0	0	0.0691085	0.0570776	0	0	0	0	0	0	0	0
7	1	6	1	7	5	0	0	0	4	2	2	10	0	0	0			22	0	0	0	0	0	0	0	0	0	0	0	0	0	0	0	0
1	1	3	1	3	0	0	1	0	4	1	0	6	4	1	3			24	0	0	0	0	0	0	0	0	0	0	0	0	0.0694927	0	0	0
3	2	0	0	4	2	5	1	2	2	2	0	8	2	6	2			26	0	0	0	0	0	0	0	0	0	0	0	0	0	0.040833	0	0
2	2	5	0	1	2	3	2	2	4	0	0	7	10	6	5			28	0	0	0	0	0	0.0950119	0.0691085	0	0	0	0	0	0	0	0	0
3	1	1	0	5	4	1	3	0	5	1	1	3	0	0	0			30	0	0	0	0	0	0	0	0	0	0	0	0	0	0	0	0
3	1	1	0	4	5	9	1	1	2	0	1	3	0	0	0			32	0	0	0	0	0	0	0	0	0	0	0	0	0	0	0	0
5	1	0	3	4	4	2	1	1	3	1	2	0	2	1	5			34	0	0	0	0	0	0	0	0	0	0	0	0	0	0	0	0
0	5	0	3	4	2	5	6	1	3	2	1	8	1	3	1			36	0	0	0	0	0	0	0	0	0	0	0	0	0	0	0	0
6	0	3	0	2	5	4	2	4	5	2	1	5	4	2	1			38	0	0	0	0	0	0	0	0.0570776	0	0	0	0	0	0	0	0
5	2	0	1	3	7	1	4	1	5	1	0	6	2	3	1			40	0	0	0	0	0	0.0475059	0	0	0	0	0	0	0	0	0	0
4	4	2	0	2	6	4	2	0	0	1	0	6	6	6	0			42	0	0	0	0	0	0	0	0	0	0	0	0	0	0	0	0
4	0	1	3	5	3	3	1	0	3	0	3	6	4	3	0			44	0	0	0	0	0	0	0	0	0	0	0	0	0	0	0	0
3	5	2	1	3	1	8	3	0	1	2	1	13	0	1	1			46	0	0	0	0	0	0	0	0	0	0	0	0	0	0	0	0
4	0	2	0	1	1	3	3	5	4	0	0	4	2	2	0			48	0	0	0	0	0	0	0	0	0	0	0	0	0	0	0	0
4	2	1	2	9	7	5	5	2	3	3	0	0	4	2	0			50	0	0	0	0	0	0	0	0	0	0	0	0	0	0	0	0
0	2	2	0	6	3	0	2	1	2	0	0	1	2	2	3			52	0	0	0	0	0	0	0	0.0570776	0	0	0	0	0	0	0	0
4	7	1	1	5	5	0	0	0	0	0	0	1	0	3	4
2	1	4	2	8	3	1	1	0	1	1	1	2	4	4	1
4	1	0	1	6	0	1	3	2	4	1	1	23	7	4	0
0	1	1	2	4	5	1	0	0	1	3	3	5	4	3	0
3	5	0	0	9	4	2	1	0	0	2	2	11	2	0	0
2	2	1	2	5	2	6	2	1	1	2	1	9	3	6	3
2	7	0	0	7	3	1	1	2	0	0	2	8	0	4	0
1	4	0	1	6	1	2	0	1	3	5	1	7	3	2	1
1	4	1	2	2	4	2	4	0	3	1	0	2	5	5	2
1	4	0	2	4	3	0	1	2	1	2	0	6	0	4	1
2	2	1	0	7	1	3	2	1	0	0	1	7	5	0	0
2	5	0	1	5	2	2	2	3	4	0	1	2	2	0	2
0	3	1	0	6	2	7	1	5	2	1	0	5	6	4	4
1	1	1	0	4	1	0	3	2	0	0	0	7	4	0	0
3	1	2	1	5	4	5	7	5	0	4	4	2	2	3	1
0	3	1	5	8	6	2	0	0	3	0	1	2	4	6	2
1	4	0	2	8	3	3	2	2	3	0	2	8	5	2	2
1	2	0	0	6	6	7	0	3	2	1	1	11	5	2	2
3	5	0	0	6	0	1	4	1	1	4	0	4	4	2	0
2	1	0	1	4	3	1	0	3	0	0	2	3	1	2	2
8	0	0	0	8	4	1	0	3	0	1	1	1	3	3	0
4	4	0	1	6	5	6	2	3	0	1	1	7	0	5	3
2	2	0	0	5	3	2	4	4	1	2	0	0	2	2	1
2	2	1	2	4	8	4	3	0	3	0	0	5	4	0	0
4	1	2	2	8	1	2	0	4	0	1	0	7	0	2	0
0	2	0	3	5	1	1	0	1	2	0	4	3	2	2	0
0	5	4	1	7	5	1	3	3	0	0	6	6	2	4	0
5	3	0	0	8	6	0	3	0	3	0	1	3	2	1	0
6	0	1	0	6	7	7	2	1	1	0	0	4	5	1	0
3	2	0	0	7	13	3	1	0	2	0	2	2	3	5	0
1	0	0	0	0	1	7	0	4	2	0	2	1	2	0	0
1	1	0	2	8	4	2	0	3	3	0	1	7	0	1	0
0	2	0	1	6	1	9	2	0	4	0	2	2	3	1	0
4	3	1	0	5	0	3	1	1	0	0	1	6	2	1	0
2	4	1	1	3	6	1	0	1	2	0	1	5	2	2	3
0	1	3	3	4	4	0	2	3	2	0	3	3	5	3	1
6	0	2	0	6	1	1	0	4	7	3	2	3	2	0	0
5	2	0	1	4	3	4	5	1	1	1	0	8	5	4	0
3	4	2	0	0	4	3	0	2	2	0	1	7	0	5	1
0	1	1	1	6	2	1	0	3	1	0	1	1	0	1	2
2	4	1	0	6	6	3	4	2	0	2	2	3	2	3	0
1	3	3	1	4	7	7	2	1	0	0	0	7	0	4	7
0	3	2	0	6	3	1	3	4	5	2	2	8	2	1	3
6	5	8	2	1	1	3	5	1	1	4	0	6	4	0	2
6	4	2	0	2	3	1	2	1	3	0	4	7	2	6	0
0	8	3	1	5	2	8	2	3	0	3	0	8	4	4	2
5	5	0	3	5	3	3	4	2	2	2	0	5	5	6	0
4	4	4	0	6	4	4	1	1	4	1	0	7	0	1	0
3	0	3	0	7	4	0	4	2	2	1	1	1	3	1	1
0	4	0	1	4	3	3	6	6	0	0	2	4	2	0	3
6	1	0	0	4	2	2	0	1	4	1	1	4	5	4	4
4	2	1	0	5	4	1	0	1	0	0	0	3	3	1	2
2	4	2	3	4	2	4	2	3	0	4	2	3	3	0	3
0	0	1	1	6	0	3	6	4	2	0	2	5	1	0	0
1	1	2	3	6	3	3	1	2	2	0	2	1	0	4	2
5	0	3	2	3	2	3	2	1	0	0	2	1	4	1	0
0	3	4	0	5	3	0	1	0	3	0	1	4	5	1	2
5	4	1	3	6	0	9	4	7	1	0	2	9	2	2	4
4	4	3	0	5	1	4	4	1	0	0	0	6	0	2	2
0	5	0	2	13	6	0	1	0	0	3	0	3	2	3	0
11	3	3	0	4	5	3	0	1	1	2	1	16	4	1	6
3	3	2	0	4	2	5	2	1	3	0	0	6	10	1	1
5	0	3	0	5	1	1	3	2	1	1	1	4	4	3	1
2	2	3	1	10	5	3	4	8	1	2	1	5	0	3	2
1	5	0	2	2	2	1	0	4	0	0	2	3	0	1	3
0	0	2	0	4	1	3	0	0	1	0	2	8	2	4	2
4	6	1	1	4	4	1	3	1	1	2	2	8	0	0	3
9	1	2	0	6	0	2	3	2	1	1	3	9	1	2	1
1	0	2	1	4	3	1	0	0	1	4	0	0	3	3	2
0	1	1	2	5	4	1	0	5	0	3	2	7	1	10	1
5	0	2	0	6	5	1	3	0	4	0	0	5	2	4	0
3	0	1	3	3	0	4	0	1	0	1	2	4	2	2	4
4	1	0	2	3	4	2	3	1	1	1	0	7	2	0	2
5	1	1	1	7	4	2	2	7	2	0	3	8	6	1	3
6	0	2	0	1	0	2	1	4	0	0	0	4	2	4	0
1	3	2	1	4	3	2	4	7	1	3	1	6	0	1	2
2	2	2	0	5	3	3	1	3	2	1	0	8	2	6	1
1	2	3	1	6	7	1	2	0	3	3	1	8	2	2	1
2	3	2	0	5	3	2	8	2	0	3	0	7	1	1	11
0	4	1	0	4	1	4	0	1	4	0	1	10	2	2	2
2	2	0	0	6	5	1	5	4	1	0	0	1	3	3	0
8	1	2	3	7	0	0	0	2	0	0	0	6	2	10	2
2	2	2	0	4	2	2	0	4	1	0	0	6	0	3	1
4	2	1	3	5	2	6	1	0	3	1	0	4	0	0	3
8	0	0	1	7	2	0	3	1	2	1	2	1	3	4	1
1	4	1	3	7	0	3	4	1	4	1	1	6	10	2	3
2	1	0	3	6	1	4	2	2	0	6	1	7	0	2	0
3	2	0	1	3	2	5	2	2	1	0	2	6	2	5	2
1	0	1	1	6	0	3	1	1	0	0	1	13	3	8	2
2	3	4	2	6	2	5	4	5	3	0	2	3	5	5	3
5	1	2	1	4	4	1	0	1	1	1	3	6	2	5	2
4	1	2	1	6	1	5	0	1	1	0	1	5	3	3	0
3	3	1	0	6	2	6	3	1	0	2	0	3	4	4	0
4	3	3	1	1	2	3	0	4	1	1	1	3	2	1	1
2	0	0	0	6	1	4	3	4	0	0	0	6	5	1	1
0	1	0	0	6	3	0	0	0	0	0	0	5	4	0	0
2	2	0	2	5	3	4	1	1	3	1	3	6	1	0	4
4	1	4	0	8	7	5	2	1	3	1	1	4	2	4	1
3	0	3	1	6	6	3	4	3	0	1	2	2	4	0	1
2	1	2	0	5	2	0	1	5	5	0	6	4	1	2	5
0	2	3	1	5	4	4	2	1	4	3	1	8	3	1	1
5	0	0	1	5	5	5	0	1	0	5	0	8	5	4	4
2	1	2	5	5	4	0	2	0	0	0	2	8	8	0	0
7	5	1	0	3	5	3	3	4	3	2	1	5	2	2	1
3	0	2	0	5	2	0	4	2	0	0	0	6	2	0	1
0	3	0	1	3	4	2	4	0	5	2	2	4	4	2	0
3	4	1	1	3	5	7	6	3	0	3	1	5	0	5	0
2	1	1	1	7	2	5	0	0	0	0	0	3	2	0	2
5	3	0	0	8	4	0	0	0	2	1	1	8	3	0	6
1	3	1	2	3	0	4	4	2	2	0	1	4	5	1	6
5	2	1	3	5	0	2	2	1	0	0	0	8	4	3	1
5	5	2	1	4	1	2	2	0	2	3	2	6	2	2	1
5	3	0	0	5	4	5	1	4	0	1	3	7	2	2	0
3	2	0	3	1	0	4	1	7	2	0	4	5	2	2	0
5	1	2	0	2	3	2	1	2	0	0	3	7	5	2	1
2	4	1	2	5	5	4	1	1	5	3	2	8	4	1	0
3	0	1	0	9	0	4	2	0	2	0	0	6	2	3	2
2	0	0	2	5	3	0	3	0	1	2	3	10	2	0	0
4	0	0	0	7	4	2	1	0	8	1	2	1	13	2	0
2	1	0	1	4	4	3	2	0	2	1	0	2	1	0	2
0	1	0	1	4	6	0	2	2	1	0	0	5	0	2	0
1	2	0	1	3	4	1	2	1	4	1	2	11	0	2	2
0	1	0	0	3	3	0	0	5	3	1	0	2	6	0	1
0	1	0	0	5	0	2	5	0	2	2	0	4	0	1	0
4	4	3	0	3	3	0	0	0	0	1	1	7	3	0	3
3	0	3	0	7	6	3	7	0	0	1	1	6	5	4	3
1	1	2	2	3	3	0	8	5	1	0	2	8	4	0	4
3	3	0	0	3	0	0	1	3	0	2	1	4	6	0	0
1	2	0	0	4	0	0	4	2	1	1	2	2	0	1	0
7	0	0	2	1	1	3	2	2	0	3	0	1	1	2	1
5	0	2	0	6	2	0	5	4	0	0	1	6	6	4	3
0	4	4	2	4	1	2	2	2	0	2	0	6	1	1	0
7	1	0	0	3	4	2	1	2	1	1	1	10	7	3	1
5	1	2	0	8	7	2	1	4	1	0	1	5	0	2	0
7	8	1	1	1	1	4	3	3	2	0	2	9	4	1	0
2	2	0	1	10	4	0	0	1	3	2	6	12	5	3	0
1	8	2	2	5	5	2	0	0	1	2	1	6	1	2	2
2	4	0	3	4	3	5	1	2	1	0	1	8	3	4	0
6	3	0	0	5	2	5	0	0	3	1	0	5	1	4	1
3	7	1	0	11	4	4	1	1	0	2	0	4	2	3	3
0	0	0	3	3	4	1	1	0	3	0	4	4	2	4	0
3	0	4	1	6	4	0	1	5	0	0	0	10	1	2	1
2	3	0	2	8	5	2	1	0	0	1	0	3	3	1	4
1	1	1	0	6	2	3	4	0	2	0	0	7	5	3	2
3	5	1	0	4	1	3	0	7	2	0	4	9	4	1	2
5	2	1	0	1	2	5	3	0	0	0	2	3	2	5	2
4	1	0	2	6	5	1	3	0	0	2	1	2	5	1	1
3	3	2	0	3	4	1	2	0	0	2	0	6	3	3	1
1	5	0	2	7	1	2	1	1	2	2	1	6	4	0	4
3	1	2	2	2	0	6	1	5	0	2	2	6	3	7	1
5	1	3	2	2	4	3	5	3	0	1	0	5	6	2	1
2	1	0	1	8	4	3	5	3	1	0	0	5	0	3	1
3	2	5	1	6	1	3	4	0	1	0	0	4	3	1	0
0	4	4	0	5	5	2	1	2	1	0	0	8	0	4	2
0	0	2	1	2	3	3	7	1	0	3	1	7	4	6	2
0	1	3	0	3	1	5	0	2	3	1	0	3	5	7	3
6	1	1	0	12	4	7	3	4	3	3	0	6	1	0	0
3	3	1	2	3	1	3	1	5	0	2	0	3	3	1	0
3	3	1	0	5	0	0	3	5	4	0	1	5	0	3	1
3	1	0	0	3	1	1	2	1	1	0	0	6	4	3	0
2	1	1	0	3	1	2	2	3	2	1	2	2	3	0	0
3	1	0	1	4	2	1	1	1	4	1	0	5	2	0	2
4	3	3	2	9	1	4	4	9	1	2	3	5	6	2	0
0	6	2	1	4	4	0	3	2	1	2	0	4	2	4	2
2	1	0	0	7	5	3	3	1	0	0	1	7	2	0	0
3	5	1	0	6	4	1	2	1	0	1	2	4	2	2	2
9	4	1	0	10	2	4	2	3	0	0	2	6	2	1	1
2	1	0	1	8	2	1	2	5	2	1	0	2	4	0	2
4	1	0	0	4	3	4	0	0	2	0	2	6	3	4	0
3	3	0	0	4	3	7	3	1	1	2	0	4	3	3	3
1	2	1	0	11	3	3	0	5	0	1	0	0	3	2	1
4	0	1	1	5	4	6	4	1	3	0	1	0	2	3	0
2	3	1	1	5	5	0	2	4	1	2	2	7	1	2	1
3	3	2	0	12	1	3	0	0	2	1	0	5	2	3	2
4	1	0	0	9	1	2	2	0	1	1	0	4	5	2	3
3	3	3	1	6	10	2	4	2	4	0	2	6	2	0	0
8	2	1	2	5	4	2	1	1	0	2	0	8	1	0	3
4	1	2	0	7	4	5	2	1	4	3	1	5	1	0	0
1	2	0	0	4	3	1	2	0	1	0	0	0	5	0	1
1	2	0	0	6	0	4	1	1	4	2	0	3	1	1	1
2	2	0	0	5	1	0	4	1	0	0	0	5	3	2	2
2	0	2	2	1	5	2	2	1	1	4	2	8	6	2	0
0	2	2	0	4	4	0	4	4	2	1	1	5	3	2	0
7	1	0	0	6	2	2	4	0	2	0	0	10	6	2	2
1	6	0	2	7	2	4	7	0	2	0	0	9	2	3	1
7	2	3	1	2	0	1	4	3	0	0	3	7	6	6	3
0	4	0	2	7	8	1	1	4	1	0	0	2	11	2	0
1	2	3	0	8	7	7	0	2	0	1	0	8	5	0	0
6	3	0	3	5	4	5	2	2	3	2	1	6	0	2	2
5	2	2	1	2	3	0	2	0	2	0	0	4	3	0	0
3	8	3	1	1	3	0	0	1	1	1	0	2	5	2	1
1	6	1	2	5	1	3	0	2	4	4	1	4	1	0	1
2	1	2	0	4	5	0	2	1	3	0	2	5	2	5	1
3	1	5	0	8	3	2	3	2	4	2	3	3	2	1	2
6	2	2	1	3	2	0	0	0	0	0	1	5	5	7	0
1	3	0	1	4	4	3	0	2	0	0	1	2	2	1	7
4	0	0	2	0	3	5	2	0	2	0	0	6	2	2	1
4	3	2	1	10	2	2	2	0	0	1	1	7	0	1	1
6	0	7	0	4	11	5	0	1	3	0	1	7	1	1	1
7	2	0	1	1	1	1	2	1	0	0	0	6	1	0	0
4	3	0	0	6	4	0	2	4	0	0	0	6	5	2	1
3	0	0	1	6	4	1	1	6	4	4	0	6	3	5	1
2	3	1	3	4	3	6	2	5	1	2	3	2	4	0	0
0	1	2	0	7	2	0	1	1	0	3	1	6	3	0	5
5	1	4	4	6	4	2	0	0	1	2	2	4	10	1	4
2	2	0	0	7	2	0	0	1	6	2	2	5	3	3	2
0	0	1	0	7	3	3	3	10	0	0	1	0	0	4	3
4	5	3	0	6	0	2	5	3	1	0	0	0	1	4	0
3	0	1	0	3	0	9	1	7	0	1	2	4	0	2	0
2	0	4	0	8	3	0	1	1	0	0	1	4	2	0	1
3	1	2	1	5	2	3	6	1	0	0	3	5	6	4	0
5	0	1	2	6	3	3	0	0	0	0	1	1	2	2	1
5	4	0	0	6	3	4	1	0	0	0	0	5	4	0	0
3	1	1	1	6	3	3	0	3	3	3	0	4	0	3	0
2	2	0	0	6	1	0	1	0	1	1	0	3	1	3	1
1	1	2	0	4	7	1	1	0	0	2	0	8	6	3	0
1	5	0	1	2	1	4	0	4	0	3	0	5	4	2	4
0	0	0	2	3	1	4	1	2	2	0	0	8	4	1	1
1	0	1	2	5	3	0	4	3	0	1	2	11	3	1	2
3	5	0	0	5	2	4	2	0	3	1	1	1	4	0	2
5	1	0	0	9	8	3	5	6	2	2	1	0	6	2	0
2	1	2	0	3	1	4	1	1	4	2	0	3	2	3	2
0	4	0	1	8	2	4	0	0	3	2	0	13	1	2	1
4	2	0	2	5	1	5	3	2	2	0	2	8	4	2	0
2	1	2	1	4	1	4	2	2	3	0	0	2	2	1	0
4	1	2	1	2	3	1	1	3	1	0	2	0	2	5	4
5	1	2	0	3	3	3	2	2	0	1	0	3	7	0	0
3	4	4	0	9	3	6	0	1	1	1	2	2	1	1	0
2	1	0	2	5	1	0	2	1	7	0	0	4	3	4	0
0	2	1	1	11	6	4	3	1	1	0	1	5	5	0	0
0	2	2	0	2	0	3	1	1	1	0	0	1	4	0	1
4	1	2	0	5	1	3	0	5	0	2	1	5	3	4	0
8	3	0	2	5	2	6	3	3	0	1	0	7	3	2	0
4	0	2	1	9	1	1	1	1	0	0	2	6	1	3	2
0	1	2	0	8	3	3	0	1	3	0	3	9	9	0	2
0	1	2	2	6	4	4	2	1	3	1	0	2	1	6	0
0	0	0	2	2	7	6	0	2	3	0	0	4	1	0	2
0	0	1	0	5	3	3	0	1	2	0	1	3	3	0	2
0	1	1	0	5	2	2	0	3	5	0	1	5	5	1	5
5	0	2	0	4	5	2	1	0	0	1	1	2	7	4	2
5	1	2	0	2	0	0	0	0	0	1	1	2	0	1	3
1	0	1	2	9	0	4	2	4	1	1	1	4	3	5	1
2	1	4	3	3	4	3	5	0	2	0	0	7	0	2	2
0	1	0	1	6	0	3	3	2	1	3	2	7	1	2	0
4	3	3	0	2	2	3	0	2	4	1	0	3	2	1	0
1	1	1	0	4	5	0	0	1	2	1	0	3	12	0	1
0	4	0	1	0	2	3	3	1	1	2	2	8	2	0	1
2	1	2	4	4	4	5	1	5	1	0	1	5	3	1	1
0	3	0	0	6	4	6	3	0	2	1	3	2	0	2	2
6	0	1	0	11	0	4	2	0	0	1	0	4	1	2	1
7	0	0	1	5	3	1	3	1	3	1	0	5	2	3	1
1	5	1	0	15	2	3	1	3	0	2	2	5	0	2	0
2	1	0	0	8	1	6	2	1	0	4	0	7	2	2	0
1	2	2	1	3	2	5	0	2	7	2	1	10	3	3	5
2	3	4	0	5	6	2	5	2	3	2	0	5	4	2	0
5	1	0	1	3	4	1	0	3	0	2	3	4	4	2	0
6	2	1	0	3	2	0	1	1	1	3	0	3	2	3	1
2	1	0	1	3	4	3	4	7	2	0	0	7	3	3	2
4	3	0	0	1	1	1	2	2	0	1	0	6	3	1	1
7	1	2	3	2	2	3	2	4	4	1	4	4	4	3	1
8	6	2	0	3	4	3	0	0	3	3	2	5	0	2	3
4	3	1	1	6	4	4	5	1	6	1	2	4	1	3	6
6	2	3	0	3	0	3	6	0	2	0	1	2	0	7	1
3	0	2	1	4	4	4	2	3	3	2	0	1	4	2	0
6	3	2	2	5	5	8	3	2	2	0	1	6	2	3	0
1	3	2	0	5	1	1	1	4	4	1	2	6	4	7	0
0	3	1	0	3	5	0	1	3	2	0	0	5	8	1	0
0	2	0	1	7	0	1	3	6	0	3	3	6	0	1	2
6	1	3	1	6	0	6	3	0	1	2	2	5	4	3	1
4	1	1	0	5	3	0	5	5	4	1	2	5	1	3	4
4	2	2	2	6	1	5	1	1	1	4	1	7	1	5	0
5	4	3	2	5	0	4	4	1	1	1	2	5	5	0	4
2	2	2	0	2	2	3	0	3	1	0	1	5	3	2	2
1	3	1	3	7	2	8	1	4	0	0	0	5	4	1	1
4	4	3	2	1	1	1	5	1	1	0	1	8	1	1	4
1	2	4	3	9	3	1	3	4	1	3	3	7	5	3	1
1	6	3	0	6	3	5	2	2	6	0	2	5	1	2	1
1	3	1	0	4	2	3	2	4	1	1	1	6	3	3	3
3	6	3	1	8	9	4	0	2	1	0	1	8	5	0	1
5	1	0	0	2	1	6	1	0	0	2	1	4	6	0	2
0	2	2	1	1	3	3	1	3	3	1	2	2	2	0	0
0	3	3	0	5	5	3	0	3	1	2	1	8	4	2	0
3	0	2	1	8	0	2	3	0	1	0	1	6	3	2	1
1	4	0	2	5	1	0	3	6	1	1	0	7	2	1	2
1	3	0	0	4	3	7	2	2	2	0	3	10	1	2	2
0	2	0	4	9	1	1	3	0	0	0	0	6	7	3	1
0	1	4	1	7	1	0	2	0	0	1	0	4	3	2	0
6	4	2	2	5	4	5	3	5	1	1	2	6	0	4	2
3	3	6	0	6	4	3	0	5	0	3	0	6	7	2	0
2	2	1	1	4	2	0	0	2	0	1	2	8	4	1	2
0	3	1	1	2	2	6	5	0	0	0	1	5	3	4	3
0	4	0	0	5	1	0	2	1	1	2	0	8	4	1	3
5	2	0	1	9	6	2	1	0	1	0	3	5	3	9	3
4	2	1	0	4	1	4	3	0	3	0	0	9	1	1	2
7	3	0	0	12	5	0	2	2	1	2	0	3	2	0	1
0	0	0	5	1	0	4	1	4	3	0	2	7	2	0	3
4	3	1	0	4	2	2	0	6	3	2	0	7	3	1	0
4	2	3	0	2	3	1	4	7	5	0	1	7	4	0	1
0	1	0	1	2	1	1	3	3	2	3	0	3	1	0	1
2	1	0	1	5	2	2	2	7	0	2	0	11	0	0	2
6	3	1	2	5	3	1	1	3	6	2	0	5	4	2	2
3	8	2	0	8	1	1	1	0	0	0	0	1	2	2	2
0	6	0	2	7	4	6	0	0	1	1	0	11	5	1	2
2	3	0	1	6	1	3	4	0	2	0	0	1	2	1	0
0	2	2	1	4	4		3	1	2	2	8	6	0	0	1
4	1	1	2	8	5		0	1	1	0	0	2	3	3	1
5	2	2	1	9	3		2	1	1	2	1	5	2	0	5
2	3	1	2	6	1		0	1	1	0	0	3	1	2	0
3	0	0	0	5	4		3	3	1	3	0	5	0	4	6
0	2	2	0	4	6		2	6	2	0	1	7	0	0	2
4	1	1	0	4	1		1	0	2	1	0	3	0	0	2
3	3	2	2	3	5		1	0	1	0	3	4	2	2	3
0	3	1	2	4	3		2	2	0	2	3	2	3	0	3
4	4	5		5	3		2	2	2	1	1	5	3	4	2
2	3	0		8	5		1	2	0	1	2	5	3	2	5
7	1	0		5	0		4	3	1	0	1	10	4	1	1
1	4	3		6	6		0	4	4	1	0	4	4	2	4
1	3	2		7	5		0	1	0	0	1	8	3	2	1
4	0	2		2	3		4	0	2	3	2	3	1	0	4
4	1	1		1	4		1	1	3	1	3	6	3	3	3
4	1	2		7	1		0	5	1	0	0	7	5	2	1
1	0	1		8	2		2	0	3	0	0	5	0	4	4
4	6	1		7	2		0	3	2	0	1	5	1	0	0
1	5	2		6	0		2	4	1	1	0	2	1	7	1
3	1	0		18	1		1	1	3	1	1	2	3	0	1
1	0	3		5	5		4	8	4	1	0	9	2	4	2
0	3	8		3	4		1	1	0	0	0	3	6	3	0
5	2	0		6	0		3	4	0	3	0	6	4	0	0
3	2	3		6	6		5	2	1	1	1	6	3	0	2
5	6	1		7	4		5	2	2	0	0	8	6	0	2
1	2	5		9	5		1	0	0	3	0	5	1	1	5
5	5	0		10	4		2	0	0	5	0	4	2	0	1
4	4	3		4	9		4	0	1	5	0	7	4	3	0
6	0	2		7	6		2	1	2	1	1	5	1	3	5
2	4	1		7	7		0	1	2	0	3	1	0	5	6
0	2	0		3	5		1	2	1	3	1	4	0	5	1
2	2	0		5	3		0	1	1	2	0	8	3	2	0
1	1	3		4	6		3	3	2	0	1	3	5	5	0
0	1	2		4	2		0	4	2	0	1	7	7	2	0
4	0	0		8	0		3	4	3	3	0	0	0	3	0
2	0	2		4	3		1	4	0	1	2	2	4	3	6
0	3	0		6	2		2	3	4	0	0	9	2	2	4
5	1	1		5	1		1	1	1	1	1	6	5	4	4
7	3	4		6	2		6	1	1	0	1	4	1	3	0
6	5	1		5	0		3	1	1	0	0	5	1	1	2
6	6	1		3	3		9	0	3	0	0	4	2	3	0
4	1	1		4	2		4	2	0	3	3	6	5	0	1
0	3	5		5	6		1	0	1	2	0	4	2	5	0
2	4	1		4	5		0	0	0	2	0	7	26	5	4
3	1	2		5	7		1	3	3	0	2	3	2	3	2
6	2	0		4	0		7	3	2	2	3	5	3	5	2
1	3	0		5	4		6	0	1	0	4	2	2	4	3
2	0	3		6	4		1	1	0	1	0	3	4	8	7
2	2	1		4	3		2	3	0	3	0	6	7	1	4
2	5	3		4	4		3	5	0	4	2	6	8	7	4
5	3	1		5	3		3	5	0	1	0	5	0	2	2
4	2	1		6	2		0	3	3	0	2	4	1	3	1
2	1	1		2	6		2	4	1	2	0	5	3	3	2
3	1	1		6	8		1	1	2	0	0	12	1	3	1
5	2	0		6	8		2	1	0	2	0	3	6	3	0
3	5	2		6	2		7	0	0	2	1	4	2	2	1
4	0	0		13	3		1	3	1	5	0	7	2	0	1
5	1	2		4	0		0	2	4	1	0	3	0	0	3
3	3	2		4	8		0	1	2	0	1	2	6	2	0
1	0	1		6	1		6	0	0	0	2	12	2	0	0
2	1	3		6	5		0	3	2	1	1	2	1	4	0
6	3	2		6	4		1	5	1	1	1	3	1	2	0
0	0	2		6	3		3	7	7	0	0	6	1	5	2
2	6	1		5	4		4	4	0	4	0	5	3	6	3
2	0	4		3	7		1	2	0	2	1	5	5	0	4
5	2	1		7	0		1	4	5	2	0	4	1	0	4
2	1	1		7	1		0	2	2	1	1	1	2	0	0
3	5	5		5	1		3	0	1	1	0	0	2	2	3
5	3	1		10	4		2	4	1	0	2	6	5	2	1
1	1	3		5	3		1	6	2	2	2	10	2	4	0
3	0	0		5	7		0	0	0	2	0	10	5	3	2
3	0	3		4	1		5	2	2	3	0	4	4	2	1
0	3	3		11	5		0	0	1	0	0	4	0	1	4
4	3	1		2	2		0	2	1	0	2	10	5	3	0
4	2	1		4	4		1	4	0	0	0	2	5	3	0
6	7	0		7	5		2	5	4	3	0	8	3	0	0
1	0	0		5	1		2	0	1	2	5	4	1	1	0
1	2	1		6	2		1	2	2	3	4	3	4	2	2
4	2	0		1	3		1	0	3	1	3	3	0	1	0
6	5	2		3	3		4	3	0	0	0	8	6	0	0
7		2		6	0		1	0	6	1	2	2	9	0	0
3		3		5	1		2	0	0	0	1	6	2	5	2
2		2		8	0		2	2	0	0	0	8	0	5	2
2		4		6	3		1	0	2	1	0	0	0	1	3
4		2		5	7		3	4	1	0	0	5	5	0
6		4		3	0		3	3	0	0	3	5	2	2
1		3		7	3		0	1	5	0	1	4	0	6
1		3		5	7		4	1	3	0	0	10		2
3		1		7	4		3	3	4	2	0	4		7
1		1		5	7		4	1	0	0	3	6		3
2		4		7	2		5	2	3	0	2	4		0
0		3		8	2		4	0	1	3	1	7		2
0		4		7	3		0	2	2	0	0	4		3
3		1		8	1		2	1	5	3	2	4		4
1		1		4	7		0	0	0	0	0	3		7
2		2		6	3		1	3	0	0	3	9		1
1		1		5	5		2	0	4	1	1	2		5
0		0		7	2		9	0	2	2	2	4		2
0		3		7	4		0	0	2	0	0	0		3
4		4		7	5		4	4	0	3	1	3		3
0		2		7	5		0	2	1	1	1	7		1
2		0		6	2		2	5	0	0	1	7		0
4		4		7	4		5	0	4	2	0	5		3
5		0		3	1		1	0	2	0	0	3		2
8		1		1	4		3	2	2	2	1	7		4
2		1		8	3		1	2	7	0	0	6		4
6		0		6	0		0	4	1	4	2	3		7
5		0		7	5		0	1	5	0	2	7		2
4		6		6	5		2	1	0	0	0	5		3
2		3		5	0		2	3	2	1	0	6		4
5		0		7	2		2	1	2	1	0	4		4
5		4		4	7		3	4	1	2	0	5		0
0		2		5	5		5	1	2	3	1	5		4
6		2		5	3		0	0	0	0	2	3		3
2		1		6	1		0	1	0	1	0	1		5
2		3		9	1		1	0	1	0	3	6		6
0		4		7	5		2	1	1	0	0	3		6
5		2		8			0	6	0	0	1	7		3
0		1		6			0	1	2	0	2	4		3
2		0		12			0	2	1	0	2	5		1
5		0		7			4	3	2	0	1	6		2
2		2		0			1	3	2	2	4	2		4
1		2		3			2	0	3	0	0	1		5
1		1		9			10	4	4	0	0	10		0
3		2		2			4	1	2	2	2	4		1
2		1		1			1	2	7	3	4	5		4
3		2		5			1	3	0	0	0	0		0
2		6		8			0	1	0	0	2	2		6
5		0		3			2	0	6	0	3	6		2
8		3		8			4	2	4	1	0	4		0
2		1		7			2	6	4	2	2	0		2
5		0		6			0	0	0	0	2	4		5
2		2		7			3	4	0	5	0	3		4
0		0		9			3	2	3	0	1	3		0
0		3		2			5	0	4	0	0	5		0
2		1		8			0	1	1	2	0	4		3
3		0		4			0	2	1	1	0	6		2
2		3		6			0	2	1	1	0	6		3
5		2		0			0	2	3	0	1	1		2
6		5		7			2	0	1	1	0	1		0
0		0		7			3	0	0	0	2	4		1
1		1		5			5	3	1	2	1	5		8
8		2		0			0	0	0	2	1	3		3
2		2		7			0	0	0	4	1	5		1
2		3		2			3	3	1	4	1	5		2
2		1		3			0	5	1	2	1	6		2
11		0		1			1	0	1	0	2	6		0
4		0		3			3	1	1	1	2	4		0
6		1		1			4	1	0	0	1	4		3
0		0		4			0	4	1	1	1	7		4
3		4		7			0	2	4		0	5		5
		0		5			1	0	3		4	2		4
		0		4			2	4	3		2	6		4
		1		8			3	1	1		0	6		2
		0		4			2	1	0		0	3		1
		4		6			0	0	0		1	6		3
		4		5			1	1	5		2	3		3
		4		5			4	3	1		1	6		1
		0		2			2	5	2		4	3		4
		0		7			3	4	1		1	6		0
		2		3			3	0	1		3	6		3
		0		1			2	5	4		0	5		0
		3		4			5	3	0		0	3		2
		1		4			1	2	2		1	3		0
		2		2			0	4	4		5	1		5
		1		4			1	2	1		0	6		1
		0		5			3	0	1		3	4		4
		0		7			0	2	3		0	4		0
		0		8			5	1	4		0	1		4
		2		5			1	2	0		0	5		2
		4		3			3	0	0		0	8		1
		5		3			0	0	1		4	1		6
		0		8			3	4	1		1	4		1
		0		2			3	1	0		0	8		3
		3		6			1	3	2		0	4		3
		1		10			0	2			1	5
		0		9			3	2			2	2
		2		6			0	0			2
		3		2			0	3			1
		4		10			0	4			0
		0		1			7	3			2
		1		6			0	1			1
		3		4			1	0			5
		0		6			1	1			1
		2		7			1	4			1
		4		4			2	4			3
		1		5			2	0			0
		4		7			0	1			1
		0		5			7	0			2
		0		6			9	0			1
		1		11			0	3			3
		3		10			4	0			2
		0		3			2	0			0
		0		8			1	1			1
		0		10			4	2			2
		0		5			1	0			0
		1		4			2	0			4
		2		7			1	0			0
		5		11			1	2			0
		0		6			5	0			0
		4		9			0	2			1
		0		5			0	4			0
		1		7			2	5			0
		2		4			0	3			0
		0		6			3	3			0
		4		3			0	4			1
		1		5			0	1			1
		1		1			2	1			0
		4		5			2	2			2
		1		5			0	2			0
		1		7			0				0
		1		4			2				0
		2		5			0				0
		5		9			0				2
		0		12			2				2
		2		4			0				1
		1					0				0
		1					2				3
		1					1				0
		0					1				0
		0					0				0
		0					0				1
		2					4				2
		2					0				0
		2					1				3
		6					2				2
		2					2				0
		1					0				1
		2					3				1
		1					3				2
		0					1				0
		3					0				7
		2					4				0
		2					1				4
		3					0				4
		0					0				1
		1					3				5
		3					6				1
		3					3				0
		2					3				0
		0					1				1
		1					2				5
		2					1				2
		0					0				2
		1					2				2
		0					1				2
		2					2				0
		2					2				1
		3					3				1
		0					0				0
		6					3				4
		0					3				0
		3					0				1
		1					4				1
		3					1				1
		0					0				1
		1					3				0
		2					0				0
		0					0				1
		1					4				2
		3					3				2
		2					1				0
		2					3				0
		0					0				0
		1					2				0
		3					0				3
		0					0				0
		1					7				1
		1					3				1
		1					2				0
		0					3				2
		2					0				0
		1					2				1
		0					8				0
		0					1				1
		3					0				0
		3					6				0
		1					0				3
		3					2				2
		0					3				1
		0					3				2
		2					2				0
		2					0				0
		3					2				2
		1					1				0
		4					3				0
		2					2				1
		2					0				4
		0					0				2
		1									0
		1									0
		4									0
		0									5
		1									0
		0									3
		3									0
		0									0
		0									0
		0									1
		0									2
		1									0
		0									0
		0									0
		1									1
		1									0
		0									0
		0									0
		0									4
		0									0
		2									0
		0									2
		2									3
		0									4
		5									2
		2									1
		2									0
		2									5
		2									0
		0									6
		0									2
		1									3
		1									0
		1									2
		3									1
		2									0
		1									3
		0									1
		2									1
		3									0
		2									1
		1									2
		2									3
		0									2
		0									2
		0									5
		6									1
		3									1
		3									0
		0									1
		1									1
		3									0
		1									2
		0									2
		0									1
		0									0
		0									0
		3									0
		0									5
		0									0
		3									1
		3									0
		0									1
		0									5
		1									0
		7									0
		2									2
		0									1
		2									2
		1									1
		3									2
		0									0
		0									0
		5									0
		2									2
		0									0
		2									5
		0									3
		1									0
		1									2
		2									3
		3									0
		1									0
		2									2
		2									1
		6									1
		5									0
		1									1
		1									0
		0									1
		2									0
		1									3
		1									1
		1									3
		0									0
		0									0
		3									3
		1									0
		2									1
		0									0
		1									2
		1									2
		1									2
		2									0
		0									1
		0									0
		0									0
		2									2
		2									1
		1									2
		4									2
		2									1
		2									0
		0									1
		0									1
		1									1
		0									1
		0									1
		3									0
		1									1
											2
											0
											1
											3
											1
											0
											0
											0
											0
											1
											1
											0
											2
											2
											2
											1
											2
											1
											3
											1
											4
											1
											0
											1
											1
											4
											2
											1
											0
0	3	1	1	10	12	8	3	0	1	4	0	4	2	1	0
0	2	2	2	7	3	2	5	3	0	1	0	2	4	1	0
4	4	2	0	5	8	7	14	1	1	1	0	4	2	1	6
5	6	2	0	6	11	6	2	2	3	0	1	4	1	2	1
1	4	2	1	5	6	2	3	0	2	3	0	6	5	2	0
1	2	3	0	7	4	6	2	1	1	4	1	1	2	0	1
2	6	1	2	8	4	2	4	7	2	0	1	3	0	2	2
1	4	2	2	2	1	6	6	3	2	0	0	4	2	0	5
5	2	1	0	6	4	9	4	1	1	4	1	2	3	2	0
4	2	0	1	6	7	7	3	0	3	2	2	3	0	2	0
1	3	4	3	6	2	5	10	0	2	0	0	2	4	3	1
4	0	1	1	8	5	0	7	0	3	1	0	4	1	1	1
4	2	7	0	10	5	7	3	0	3	1	6	1	2	1	0
1	0	2	1	6	2	3	5	2	1	2	2	2	3	0	5
1	0	5	2	5	2	6	5	2	2	0	1	1	1	0	5
4	0	1	4	7	2	7	10	3	1	5	0	4	1	0	1
3	1	2	4	8	6	4	3	4	2	0	2	5	3	1	0
4	0	2	2	7	3	4	8	3	1	0	0	4	4	0	2
2	0	1	0	6	8	0	9	0	0	0	4	1	0	1	0
5	3	2	0	5	12	3	4	4	0	1	0	1	0	0	3
4	4	8	1	5	5	3	2	1	2	1	0	3	3	0	1
1	0	1	1	6	9	1	5	1	0	0	0	3	0	0	0
8	1	3	5	9	7	10	4	2	1	0	0	0	3	3	1
1	1	5	0	6	2	10	2	1	5	2	1	3	0	2	0
7	1	1	4	8	8	2	3	2	1	1	0	2	2	5	2
0	0	1	2	8	6	5	5	3	2	0	2	0	2	0	1
9	3	3	5	8	6	4	2	5	6	0	0	1	2	2	2
5	2	3	2	8	4	5	5	1	0	1	0	0	1	1	0
2	0	0	2	6	6	5	3	2	0	0	3	0	2	0	5
0	2	3	3	4	3	1	7	1	0	2	2	2	2	0	3
3	4	1	1	9	8	3	6	2	1	2	1	3	0	3	1
4	0	1	1	7	8	3	2	1	1	0	0	1	6	0	2
1	7	0	3	9	5	5	0	1	2	0	0	2	4	1	1
7	1	3	1	8	5	5	6	2	7	0	3	5	1	0	0
2	0	1	0	6	7	5	2	2	3	3	5	4	0	3	0
2	1	6	3	8	3	4	5	4	0	0	3	4	5	2	2
3	0	2	5	7	3	5	3	2	5	4	1	4	2	3	0
4	1	1	1	7	3	28	3	6	0	0	2	0	3	0	0
0	0	1	3	8	8	7	5	3	0	1	2	5	5	2	1
1	2	1	3	7	1	7	11	3	0	2	0	2	1	1	4
4	4	4	0	6	0	8	3	1	2	1	1	2	1	2	1
6	0	2	0	8	12	4	13	0	1	0	4	0	2	4	1
6	1	3	7	6	4	8	2	1	1	1	2	0	3	1	1
2	2	0	0	8	7	3	6	3	2	4	2	6	2	2	2
2	0	1	6	9	3	2	0	4	0	0	0	1	7	1	4
5	2	3	4	9	28	4	2	5	2	2	0	4	0	0	1
0	1	0	0	7	6	5	6	2	2	2	0	3	5	0	0
2	2	2	1	5	5	1	38	4	1	4	2	1	3	1	0
1	2	1	4	6	5	3	5	9	0	0	1	0	0	3	0
2	2	1	0	9	4	0	0	0	0	2	0	1	2	0	0
6	5	5	2	7	3	3	6	1	0	2	0	4	0	1	0
0	2	1	1	10	5	6	3	1	0	3	2	5	0	0	0
0	0	2	2	8	7	8	4	2	1	3	0	2	3	0	0
5	0	0	1	4	4	3	2	1	1	2	2	4	0	0	3
3	4	0	1	3	5	3	3	0	0	1	2	0	4	4	6
4	2	3	3	9	5	7	6	0	0	0	1	2	2	2	3
6	6	1	1	8	4	1	15	6	1	3	0	4	0	1	1
2	4	5	0	9	6	7	6	0	4	4	0	1	1	2	6
7	2	6	0	9	3	0	2	2	0	0	0	4	1	1	4
4	1	1	0	10	5	5	0	0	0	1	2	3	5	0	2
4	3	1	3	7	3	3	4	3	0	0	0	5	3	2	0
5	0	7	1	8	6	4	9	0	1	1	0	7	2	1	0
3	3	0	1	7	3	11	2	1	4	2	2	0	6	0	5
3	0	2	0	9	4	4	6	5	2	0	0	0	0	0	0
4	1	4	2	8	4	3	6	0	2	1	3	2	5	0	3
4	1	2	1	4	5	9	1	4	3	4	1	4	1	0	3
0	0	4	2	7	5	5	4	0	0	1	0	0	4	0	2
3	4	3	3	9	4	6	8	8	2	0	0	5	2	3	2
0	3	5	4	4	4	5	2	0	0	2	1	0	2	2	1
2	1	3	1	6	4	1	7	3	1	0	1	2	2	0	3
8	0	0	2	5	8	9	2	1	0	2	0	3	3	1	4
1	1	4	0	6	7	7	6	8	3	6	0	1	2	0	2
2	2	3	0	8	1	6	3	2	2	0	0	2	1	1	3
3	2	3	1	6	7	8	3	0	0	0	1	0	2	0	3
2	0	4	0	10	3	6	8	6	1	0	0	4	1	3	2
0	0	2	0	7	0	8	3	3	3	2	0	3	3	0	1
3	2	0	0	9	7	1	4	6	1	2	2	2	0	2	0
1	5	1	2	7	6	4	0	0	1	0	2	2	0	0	0
5	0	0	4	7	3	6	5	3	0	1	0	6	3	0	3
7	2	6	1	6	6	5	1	6	1	0	2	7	5	3	3
6	5	3	5	7	2	2	2	3	3	3	0	0	3	4	4
1	4	4	0	6	5	2	8	0	3	3	1	1	1	0	1
2	4	2	0	5	4	9	7	0	4	3	0	5	0	2	0
1	0	2	3	2	8	2	6	1	2	0	2	2	0	5	0
4	2	3	0	7	7	9	6	5	0	2	0	5	2	0	0
0	2	0	0	6	9	6	3	2	3	1	6	0	4	4	1
3	2	5	3	7	5	2	5	1	0	3	0	4	3	3	0
2	0	3	2	8	1	8	5	1	1	0	2	3	2	0	3
2	2	2	2	8	3	7	3	0	3	0	1	2	2	4	0
2	0	2	0	9	5	3	2	3	1	0	1	3	1	0	0
3	0	2	2	7	4	1	6	2	1	0	0	0	1	0	1
1	3	4	2	11	8	5	3	0	0	3	0	2	5	1	0
3	0	0	1	4	5	3	6	1	0	1	1	1	2	2	2
6	1	0	2	12	3	5	6	3	1	2	0	6	0	0	0
8	3	0	1	7	0	2	3	2	1	3	0	1	0	1	1
2	6	1	1	5	2	2	4	3	1	1	0	3	4	2	1
4	7	0	0	4	4	7	6	6	2	0	4	4	1	1	8
5	2	0	12	5	1	8	5	6	2	0	0	3	1	1	1
4	8	3	1	11	6	8	6	4	0	0	2	5	2	4	1
1	0	2	2	9	7	6	13	1	1	3	2	0	5	1	1
0	1	4	2	7	6	7	1	1	0	0	0	4	4	1	4
5	6	3	2	6	4	7	4	1	1	1	2	4	5	0	0
4	0	0	6	9	6	9	1	1	2	0	0	2	0	1	0
0	0	1	0	4	6	1	2	0	2	6	0	7	4	4	3
6	1	0	1	7	1	3	9	2	3	0	1	4	1	2	2
1	2	0	2	7	3	3	1	7	1	3	1	3	3	0	0
1	0	2	1	4	18	7	0	1	1	3	2	0	11	1	3
5	0	4	2	7	6	4	5	1	1	2	6	1	8	1	2
1	0	3	3	6	6	10	2	3	3	3	3	1	0	2	0
3	1	1	0	6	7	6	1	0	0	2	0	7	1	1	5
0	0	1	1	7	5	5	6	2	0	1	1	5	3	3	0
1	2	0	0	5	7	4	4	1	0	2	1	5	1	0	1
5	1	2	0	8	5	6	6	2	0	4	4	3	4	2	2
1	2	2	1	9	6	5	7	0	1	6	2	5	3	0	1
2	1	1	1	3	5	4	0	2	1	0	1	6	0	4	0
2	0	2	0	7	4	3	3	3	0	0	3	5	6	2	1
0	4	4	0	8	3	2	15	2	0	1	0	0	0	0	0
2	4	4	0	8	1	7	51	1	1	5	1	4	2	2	0
3	2	2	3	10	28	7	3	2	0	1	4	7	0	0	1
0	1	4	0	6	7	8	3	0	0	1	3	1	1	1	4
4	6	0	1	6	4	1	19	1	1	0	1	7	3	3	3
1	5	0	0	10	1	1	5	2	0	0	0	0	0	1	4
0	1	4	0	4	5	1	1	3	0	1	3	2	3	2	3
2	1	0	0	5	3	9	3	0	0	2	0	4	4	0	0
3	1	1	1	6	9	9	3	0	4	0	0	4	2	1	0
9	3	5	0	6	6	5	3	1	0	0	1	5	3	2	3
2	0	4	0	5	10	6	3	2	0	1	0	0	1	0	0
1	0	3	2	6	11	5	3	1	0	0	1	1	0	0	3
5	2	3	0	7	4	10	1	3	1	1	0	3	0	3	0
5	0	0	3	7	2	3	6	5	0	0	1	3	5	1	3
2	2	0	1	9	5	7	6	6	0	2	2	6	3	1	0
1	5	5	1	5	4	1	3	2	0	0	0	3	3	2	3
1	4	3	2	5	10	6	4	5	2	1	0	4	0	2	3
1	4	1	5	7	1	7	3	1	0	0	0	5	4	2	2
4	1	1	0	9	5	1	5	4	0	1	0	1	2	2	3
6	2	3	1	6	2	3	5	0	1	0	3	2	1	1	2
8	0	0	2	9	3	7	3	1	4	1	1	0	0	1	1
1	5	3	2	12	3	2	5	1	2	0	1	6	1	2	0
7	2	1	2	9	1	1	6	1	2	2	3	6	1	2	2
2	3	4	1	2	5	5	1	1	1	0	0	5	1	3	3
1	0	0	4	4	6	8	3	0	0	1	3	4	4	2	1
0	5	0	0	6	4	9	0	0	1	1	2	4	2	0	2
2	4	3	1	3	5	4	5	1	0	1	3	2	0	1	3
0	3	4	2	8	6	10	4	2	0	3	0	3	2	6	1
1	0	5	2	11	11	4	5	3	1	1	0	2	2	1	4
3	0	2	3	5	4	2	9	4	2	2	0	2	1	1	1
3	3	5	0	11	6	5	6	2	2	3	0	6	2	2	0
3	2	2	0	8	8	5	1	4	2	3	1	5	0	1	0
3	5	1	0	8	4	1	2	1	0	0	2	5	0	2	3
4	4	3	0	7	2	10	3	2	1	1	0	4	3	0	1
6	5	2	0	6	4	20	3	0	1	2	1	7	2	4	5
5	1	3	2	4	2	3	0	2	3	1	3	2	0	3	4
0	0	5	0	6	6	6	4	1	1	0	0	6	5	5	0
5	2	2	0	6	0	2	0	2	0	2	0	3	1	4	4
2	2	3	1	7	5	5	0	6	0	0	0	2	3	2	0
3	0	3	1	7	6	4	1	3	1	3	0	3	0	0	0
1	1	0	0	9	4	3	1	4	2	1	2	3	2	3	0
1	6	4	3	9	3	3	0	0	0	0	1	8	4	0	3
7	2	1	1	9	7	9	1	2	0	0	1	1	3	2	2
1	0	1	4	4	3	5	1	2	1	0	1	4	1	1	0
2	2	2	1	6	6	6	0	3	0	4	2	1	1	1	0
5	0	4	1	8	7	1	2	3	1	1	0	3	1	2	2
1	3	1	1	8	7	6	0	5	0	0	2	2	2	2	1
4	5	3	1	6	4	1	10	3	0	1	1	4	1	0	0
1	0	3	0	1	3	12	0	0	1	0	2	0	5	1	0
6	2	3	1	10	3	7	1	3	4	0	0	2	2	0	1
5	1	0	6	6	1	7	0	0	1	1	0	0	1	1	2
4	1	1	0	5	6	6	3	3	0	2	2	0	4	0	1
2	3	2	3	2	5	0	0	3	0	2	0	7	5	1	1
7	1	3	0	9	5	6	5	9	0	0	3	2	2	1	2
6	3	5	1	5	7	6	8	2	2	2	3	0	0	3	0
1	5	1	1	4	6	3	3	5	0	1	1	3	0	0	0
7	2	2	4	7	3	3	7	2	0	0	2	3	2	0	1
1	0	3	1	8	3	4	2	2	0	0	1	4	3	1	0
5	7	6	0	14	8	7	0	7	2	3	5	4	3	0	2
4	1	4	1	9	5	4	5	1	1	0	1	1	1	0	0
5	5	0	6	8	4	3	5	3	1	1	4	6	1	1	0
0	0	3	2	5	8	5	1	0	0	3	3	2	2	1	1
3	0	1	3	6	3	4	7	1	0	3	0	3	0	0	5
5	3	4	4	3	2	7	10	1	0	0	3	4	4	0	4
0	1	2	1	10	6	4	4	0	2	0	0	5	3	0	1
3	1	3	3	7	2	3	5	2	0	0	1	0	0	3	3
3	4	0	0	8	5	5	2	7	0	1	2	4	0	5	0
6	2	1	0	9	7	5	5	3	0	4	0	2	4	3	2
1	3	0	2	11	7	3	1	0	2	1	0	2	1	3	0
1	1	5	3	8	4	4	2	2	0	0	0	1	0	3	5
4	4	0	4	7	0	5	1	0	2	3	0	0	5	1	0
1	2	2	2	4	7	3	3	3	0	0	1	4	4	5	1
1	3	1	0	6	6	3	12	1	3	5	1	6	2	3	0
2	0	0	1	9	3	13	5	2	1	2	1	2	3	2	0
3	2	2	1	6	9	4	4	0	4	1	4	3	3	3	0
4	2	0	1	3	2	11	7	0	3	0	0	7	0	2	0
1	2	2	0	5	6	9	7	2	1	1	3	9	5	3	3
6	0	1	1	6	3	7	4	0	0	3	2	1	0	0	5
6	0	3	1	8	8	2	3	2	3	0	0	8	0	0	3
7	4	1	2	7	3	5	0	3	0	1	1	1	3	3	0
2	3	2	1	6	6	6	7	2	0	2	3	2	3	4	0
5	2	2	1	9	2	2	2	2	0	2	2	0	2	3	1
5	1	0	0	10	7	0	2	1	1	1	1	3	4	2	3
6	4	2	0	7	9	1	1	1	2	1	4	0	1	2	3
2	2	1	1	6	2	8	7	4	0	2	0	5	0	0	1
1	3	0	2	8	6	5	0	1	0	3	2	4	4	1	0
1	2	1	0	8	7	2	3	2	1	2	0	0	3	1	1
3	3	3	1	5	5	15	1	0	1	1	3	2	0	0	4
4	0	0	1	10	7	8	2	0	0	0	2	1	3	1	2
1	2	3	1	9	8	5	1	2	1	0	0	1	4	3	1
2	0	0	0	6	7	3	8	0	0	4	2	2	1	2	2
0	1	0	2	6	4	4	7	4	2	0	3	4	1	2	8
0	2	1	2	7	4	4	6	0	2	2	1	4	3	0	4
3	2	0	4	4	3	3	2	2	2	1	1	2	1	1	6
5	2	4	1	14	5	0	3	3	1	2	1	4	3	0	2
4	0	1	4	4	6	5	4	1	0	1	2	3	2	0	4
4	1	1	4	5	0	0	3	0	2	1	0	4	2	0	1
4	2	0	1	6	2	5	6	2	0	0	1	1	3	0	2
4	1	0	0	7	5	4	0	0	1	2	0	5	1	2	6
7	0	1	2	5	4	7	3	1	0	1	1	1	3	0	4
6	5	0	1	8	7	5	5	1	0	0	0	4	0	2	0
8	0	3	2	4	3	4	4	2	1	1	2	2	0	5	0
3	4	1	5	6	6	5	6	2	0	0	1	4	2	0	4
5	0	1	3	8	7	4	0	0	3	0	2	6	2	2	4
1	5	4	3	7	3	4	4	0	0	0	0	7	1	0	2
1	5	0	4	12	5	5	3	0	2	3	1	2	0	2	1
5	0	4	0	8	1	6	3	4	0	0	3	5	3	2	0
1	4	1	1	10	4	4	3	2	2	0	2	0	0	0	1
7	0	2	3	9	7	2	4	0	1	1	1	8	2	0	1
0	1	1	1	5	2	3	5	6	1	0	2	2	3	3	0
7	1	0	0	18	2	7	8	1	1	0	2	3	7	1	2
2	1	1	1	11	10	1	4	2	1	1	1	3	1	1	1
3	3	2	0	7	4	1	11	4	1	2	3	0	2	1	0
2	2	2	2	8	4	4	7	0	0	1	0	3	3	0	4
4	3	0	3	6	0	9	3	0	1	1	0	5	0	2	0
4	1	0	1	6	8	7	2	2	0	0	4	6	4	1	0
3	3	6	0	10	5	0	9	4	2	1	4	5	1	2	3
5	0	6	1	4	2	0	3	3	3	1	2	0	2	0	2
7	4	3	2	9	5	9	3	1	2	0	0	4	3	1	6
3	0	0	0	9	2	5	2	0	0	0	0	2	1	1	3
2	5	1	5	6	7	4	5	2	0	1	2	6	4	3	0
3	7	2	0	8	5	1	5	4	0	1	0	5	5	1	1
0	0	5	1	5	6	5	4	0	0	2	1	5	3	0	1
2	1	3	0	15	0	7	5	5	1	3	1	3	3	3	1
3	2	2	2	4	6	8	4	1	1	0	0	5	1	1	0
0	0	3	2	5	5	8	5	1	0	1	0	1	0	1	0
8	7	1	0	12	9	8	1	5	1	0	3	5	5	3	1
0	3	3	1	10	8	2	5	0	1	1	0	2	3	1	1
4	4	2	3	5	7	5	1	4	0	1	1	1	0	0	2
5	3	5	6	5	10	1	5	0	0	0	0	1	1	1	2
5	1	1	1	10	6	6	10	1	0	3	0	3	2	1	0
3	8	4	1	7	5	5	2	6	2	1	0	0	1	4	0
0	0	2	0	5	15	2	6	1	1	0	2	3	2	1	0
1	4	1	4	6	4	3	1	5	0	1	0	1	3	1	3
6	4	2	3	7	4	5	3	0	1	3	1	4	1	0	0
3	2	1	4	6	2	5	4	2	0	3	0	1	0	3	0
1	2	3	2	12	2	7	1	0	4	3	2	4	6	0	1
5	2	0	1	3	7	14	11	4	0	0	1	2	2	1	1
1	0	3	0	6	9	8	4	1	4	0	0	5	5	1	0
4	0	1	1	3	7	3	7	0	0	3	0	3	4	4	0
7	4	0	0	7	6	1	3	2	1	0	2	6	1	0	2
4	1	1	3	8	8	5	4	0	1	2	1	3	3	3	0
6	3	0	0	5		2	6	4	0	0	1	0	0	1	1
5	4	2	0	3		4	3	0	1	0	1	4	4	1	0
1	3	5	0	4		1	4	4	0	0	1	4	5	4	0
4	4	2	2	8		6	1	1	1	0	1	1	4	1	2
4	3	2	1	6		3	3	0	0	0	2	4	1	1	2
0	1	1	1	7		8	3	0	1	1	0	5	5	0	2
6	3	4	2	8		4	6	6	2	3	1	0	3	0	2
3	3	2	2	5		4	5	1	0	0	1	3	1	0	1
0	3	5	2	6		0	11	1	1	4	0	7	0	0	5
4	0	1	1	2		4	4	1	0	0	1	0	1	0	2
0	4	0	1	5		1	4	4	2	0	0	2	3	0	1
3	0	5	1	7		2	3	4	1	3	0	3	0	2	0
3	3	2	0	6		4	2	3	0	2	1	6	0	4	4
2	3	3	3	7		4	4	2	2	0	3	2	3	0	1
3	2	1	0	5		8	4	2	2	2	0	5	0	1	1
5	1	2	2	8		6	1	2	3	3	3	1	0	3	4
0	2	3	1	9		2	3	0	0	5	0	5	2	1	1
2	1	3	3	7		5	0	2	1	0	1	5	6	0	1
3	3	0	3	11		3	2	2	3	0	0	5	1	1	2
4	4	1	6	9		7	3	1	2	2	0	1	3	3	0
0	4	5	2	8		2	5	2	0	0	2	1	4	2	2
5	0	0	0	9		2	2	1	2	1	1	2	0	1	1
2	2	0	3	7		6	0	0	0	2	0	4	2	5	0
1	3	1	3	3		7	5	3	0	1	1	1	1	3	4
1	1	1	1	6		6	0	8	0	1	4	2	1	0	3
3	2	1	4	3		4	6	1	0	4	0	7	7	2	1
5	1	2	0	6		6	6	2	2	0	4	6	1	1	1
8	1	4	0	5		5	11	5	4	0	1	6	1	3	0
2	5	1	1	8		4	9	2	0	2	1	4	0	2	0
2	6	3	2	7		6	6	1	0	1	4	4	6	2	1
0	2	2	1	3		7	4	1	1	1	0	2	2	2	2
0	0	1	3	8		4	4	5	0	1	3	2	0	0	2
6	4	2	2	7		6	0	0	2	1	1	4	0	3	0
5	2	2	1	8		2	4	3	1	0	1	0	1	0	1
4	0	4	3	7		8	6	3	1	5	3	4	0	2	1
3	0	3	0	5		6	3	1	0	0	0	2	2	1	2
1	3	1	3	1		1	2	2	0	0	3	3	3	4	1
2	2	0	2	5		4	5	6	0	1	1	5	0	2	3
0	0	0	3	8		1	9	1	1	0	3	4	2	6	2
5	4	1	1	5		7	2	0	2	2	1	4	4	1	5
3	5	3	0	7		7	2	8	0	0	0	3	4	1	2
0	2	0	1	4		2	2	0	4	6	2	1	3	2	4
4	4	0	0	5		4	1	0	0	2	1	4	2	2	2
2	2	0	3	8		4	5	2	2	3	3	6	3	0	2
0	3	5	0	8		9	5	3	1	3	0	1	3	1	2
1	0	2	1	11		9	10	7	0	2	3	5	1	3	2
0	1	0	2	7		9	5	1	0	0	0	4	6	0	0
4	1	0	2	6		3	13	3	3	0	1	5	4	0	2
2	0	0	0	5		8	7	2	0	0	0	0	0	2	1
4	0	0	2	10		8	11	1	0	1	2	2	1	1	1
3	1	1	0	4		12	4	3	0	2	5	1	1	5	3
9	5	0	2	9		15	2	0	0	0	1	10	2	2	3
2	0	1	1	9		9	0	5	1	0	4	2	1	3	0
6	0	3	0	9		7	6	2	1	2	2	6	2	3	1
4	2	0	0	11		8	16	3	2	2	2	6	5	0	1
5	2	5	2	10		2	3	0	0	4	0	0	1	3	2
2	4	1	2	3		3	4	2	1	5	0	1	1	1	3
1	1	3	0	1		12	3	2	0	0	0	1	4	2	2
7	4	5	2	6		7	4	1	0	0	2	4	1	0	5
4	3	1	0	8		4	3	3	2	0	0	6	1	3	1
2	0	1	2	8		5	0	2	0	2	0	1	2	0	0
1	1	1	0	5		2	0	3	1	0	4	4	4	2	3
4	3	2	2	5		3	6	3	0	1	0	2	1	1	0
3	0	2	2	7		4	9	5	1	0	0	2	2	5	4
0	2	0	2	7		6	4	1	3	0	0	15	4	0	1
2	3	3	5	8		0	2	1	0	0	0	0	5	1	0
6	2	3	1	7		5	4	5	0	0	1	1	0	2	0
2	1	9	0	8		7	5	0	0	1	1	5	2	0	0
0	3	2	1	5		4	5	3	0	2	1	6	2	2	1
2	1	2	4	6		7	3	1	1	1	1	3	6	0	2
5	3	2	0	6		7	0	1	0	0	1	2	1	2	2
4	1	3	2	6		4	0	3	2	0	1	1	5	0	5
6	3	2	1	8		2	0	2	0	0	0	2	3	8	1
2	4	2	2	6		8	7	2	0	0	0	0	4	1	3
4	1	6	0	6		5	4	2	0	0	0	0	0	4	7
3	4	1	2	1		2	0	2	0	0	1	3	2	0	1
4	1	3	0	4		7	0	0	0	0	3	3	2	2	4
2	5	0	3	0		4	0	5	2	0	3	1	5	1	0
1	1	2	2	5		8	0	4	0	2	3	2	7	3	5
7	5	2	0	6		6	2	0	0	2	2	3	4	2	0
6	2	2	1	9		2	1	0	0	1	0	1	3	1	1
5	4	0	1	4		3	0	2	2	0	1	1	1	0	1
3	2	0	2	5		4	0	2	3	0	1	2	0	1	2
3	1	2	2	2		2	6	2	0	1	0	1	3	2	1
3	4	4	3	6		4	5	0	0	1	0	0	4	2	2
2	2	3	3	15		6	0	4	1	1	0	3	4	0	3
5	4	0	8	8		6	3	2	2	3	0	2	4	3	1
2	3	0	2	2		11	0	2	1	1	2	0	1	0	3
1		3	1	3		8	1	3	1	0	0	4	0	2	4
5		4	2	11		6	8	3	5	0	0	4	5	1	0
0		5	1	8		5	8	2	3	4	2	4	1	0	2
3		1	1	6		8	6	2	0	0	0	4	4	0	5
0		3	2	4		3	2	0	1	2	1	0	4	2	0
1		0	0	7		5	3	2	0	0	0	3	4	0	2
3		1	0	7		8	4	0	2	0	2	2	1	3	1
2		4	3	4		4	6	4	0	0	2	8	1	1	1
3		2	3	7		4	1	5	1	0	2	2	2	3	2
8		0	0	4		4	3	2	4	2	0	5	4	2	0
0		1	1	10		2	7	0	0	0	1	3	2	2	2
1		2	0	5		6	4	0	0	1	0	2	0	4	1
2		3	1	7		8	2	2	2	3	1	1	0	0	6
3		3	2	4		10	1	2	0	0	2	2	3	1	2
1		2	0	8		2	4	0	1	1	0	2	4	4	1
0		1	1	7		3		0	0	0	0	2	6	1	5
0		1	0	10		4		2	2	0	1	5	0	0	2
0		1	1	1		2		1	0	1	1	3	4	1	3
4		1	0	5		6		3	1	1	4	5	1	2	1
0		2	2	7		1		0	2	0	2	6	0	0	5
0		3	0	10		4		0	3	1	3	3	3	6	2
1		2	2	9		5		0	1	0	0	6	3	1	1
1		1	3	10		4		2	3	0	0	1	0	1	2
5		4	0	8		4		0	1	0	0	3	4	1	2
3		1	1	10		5		1	1	0	4	6	0	4	2
1		3	2	5		5		4	2	2	0	5	3	1	2
1		0	3	10		4		2	3	1	1	4	0	1	3
3		4	2	7		7		2	2	0	0	1	2	0	2
0		2	1	5		5		1	1	2	1	0	0	1	0
7		0	0	5		7		0	1	0	4	3	0	0	3
3		0	1	3		1		1	4	0	3	6	1	2	2
0		0	2	1		8		4	0	1	1	2	0	2	0
0		2	2	0		4		1	0	2	5	1	0	2	0
5		2	0	5		3		3	3	3	0	1	1	4	1
5		4	3	7		9		2	2	0	0	5	3	0	1
0		1	0	5		5		0	0	0	2	1	3	0	1
3		2	6	5		6		4	0	0	1	4	2	2	0
1		2	1	6		4		2	2	3	1	4	2	1	2
8		3	1	8		5		3	2	0	1	4	4	1	2
5		2	2	6		3		1	3	1	2	5	4	1	3
8		3	4	8		3		0	1	2	1	1	2	3	1
7		0	2	6		7		6	0	1	1	4	5	2	3
2		3	1	9		1		0	1	0	1	4	5	2	8
4		1	4	7		7		1	0	2	2	8	2	3	1
10		2	0	8		5		1	0	0	2	4	2	1	1
1		2	2	8				1	1	1	1	1	0	3	3
1		1	5	9				1	2	0	3	3	3	2	0
4		1	0	8				1	1	0	0	4	2	1	1
1		0	0	8				0	1	1	2	4	2	2	2
2		0	5	8				0	2	1	0	0	5	2	0
3		3	3	6				0	0	0	2	3	2	2	1
0		4	3	6				2	3	1	0	0	1	2	2
6		2	2	4				5	1	1	3	2	2	5	0
4		0	4	10				0	1	2	2	5	6	0	2
0		1	2	6				2	0	0	0	2	5	3	1
1		0	3	6				0	1	2	0	6	2	2	5
0		1	1	3				7	0	0	4	0	2	1	0
0		2	0	4				3	0	2	0	6	1	4	1
0		3	2	11				1	0	0	1	5	1	1	2
4		4	0	6				2	0	1	1	2	0	2	2
2		4	0	5				2	0	1	0	3	1	4	0
4		2	1	7				4	1	2	1	5	2	2	2
3		7	0	8				1	0	1	0	4	6	0	1
10		0	1	8				1	1	1	0	0	0	2	0
0		1	2	3				1	1	4	0	2	3	0	0
2		1	2	7				0	2	0	1	5	1	2	0
6		2	1	4				0	3	3	1	3	5	0	1
2		0	2	4				0	0	6	2	6	1	2	0
3		0	3	7				1	4	0	0	3	6	0	0
4		3	2	3				0	0	1	3	1	2	2	1
1		0	1					0	0	0	1	0	6	0	0
2		2	2					0	2	0	0	1	0	1	0
1		1	1					1	4	1	3	4	1	0	1
0		0	1					2	2	2	3	3	7	3	1
0		0	0					5	0	0	4	4	2	0	2
1		2	1					1	0	0	2	1	0	0	2
1		3	0					3	4	4	1	4	5	0	0
3		1	2					0	3	3	0	3	6	2	3
3		1	7					7	2	1	1	0	0	3	4
1		1	2					5	0	3	2	1	0	0	1
2		4	3					0	3	0	3	3	1	0	3
3		4	1					1	0	6	1	4	3	4	0
4		2	9					3	0	0	0	5	2	2	3
1		2	4					5	0	0	1	1	1	0	2
5		2	2					3	2	2	1	3	2	1	4
3		4	4					1	0	3	1	3	1	0	1
3		1	4					1	1	1	2	0	2	2	2
6		3	0					1	1	2	1	5	1	1	1
2		2	2					5	0	1	7	5	1	2	2
0		2	8					1	0	2	2	1	5	4	2
0		2	2					5	0	3	1	2	3	0	2
4		2	1					4	0	1	0	0	4	0	1
6		2	2					5	0	1	0	3	0	0	2
4		1	1					1	2	1	1	0	2	1	0
2		2	4					0	0	1	1	5	3	0	0
0		0	3					1	0	0	1	5	1	1	1
4		0	1					2	0	2	1	1		1	2
3		3	5					2	1	0	0	2		0	0
4		1	0					2	1	4	0	1		2	1
2		2	5					4	1	0	1	3		0	0
0		3	1					3	0	4	4	3		0	3
10		1	2					0	0	3	0	0		0	0
2		4	2					2	3	1	1	2		0	0
3		5	0					2	4	0	5	5		3	2
1		0	1					6	1	4	0	2		1	0
5		1	0					0	1	2	5	4		1	1
6		2	0					1	2	2	2	2		3	1
6		0	2					3	5	0	0	0		1	0
2		1	1					5	2	2	0	1		0	1
3		3	1					0	1	0	2	1		0	2
4		2	1					1	0	1	0	4		3	3
2		5	3					1	1	0	1	0		2	0
6		1	6					3	1	0	1	6		4	0
1		6	4					3	0	2	2	4		0	2
0		1	4					3	1	1	1	2		0	0
3		1	0					0	1	4	0	6		2	3
5		2	2					0	0	1	0	2		5	2
6		5	0					4	1	1	0	4		0	1
6		1	0					3	0	0	1	0		3	1
2		2	2					0	3	1	1	1		1	3
2		8	0					2	0	0	1	5		0	1
5		1	1					4	0	2	0	4		1	1
0		1	0					0	0	0	0	2		1	2
0		4	0					2	1	1	0	1		0	0
0		5	5					2	0	0	0	3		3	3
3		1	0					3	2	2	2	1		1	4
9		5	4					1	0	0	0	3		2	3
4		3	1					1	0	0	0	4		1	1
5		4	1					7	0	0	3	5		1	1
3		1	3					3	2	3	0	5		1	1
3		0	1					0	3	3	0	4		2	2
5		3	0					3	0	3	1	1		0
6		1	1					6	2	1	0	0		0
1		6	5					2	1	0	2	6		0
0		6	1					0	0	0	0	5		0
3		1	3					2	0	4	0	0		1
5		1	3					7	2	2	2	2		0
0		1	2					5	1	0	2	2		3
3		7	0					4	0	3	0	1		1
0		1	2					0	0	2	4	6		1
1		2	2					2	0	2	0	3		1
6		1	3					0	4	1	1	2		2
5		0	0					1	2	0	1	5		0
3		4	1					0	0	1	0	1		1
3		3	0					4	0	1	0	0		2
4		4	0					5	1	2	1	4		0
4		1	0					0	0	0	0	6		0
4		2	0					3	1	0	1	0		4
		9	1					1	3	2	2	2		5
		3	1					1	1	0	0	0		1
		2	3					1	0	0	1	0		4
		2	3					3	0	1	0	1		2
		5	0					0	0	1	0	7		4
		0	1					2	0	0	2	3		0
		0	2					2	1	2	0	3		0
		0	1					1	2	2	2	6		2
		2	3					2	0	1	2	6		0
		3	2					0	0	1	2	4		2
		2	2					2	0	3	0	1		1
		6	3					3	2	2	0	4		3
		1	2					1	0	0	0	3		2
		2	3					0	0	2	0	6		1
		0	0					1	1	1	0	4		2
		2	1					2	0	1	0	4		6
		2	2					2	1	0	3	2		3
		2	3					1	3	3	4	0		0
		1	0					0	0	1	0	5		0
		0	1					2	1	2	0	3		0
		2	3					3	0	0	1	1		0
		3	1					5	0	0	0	1		1
		1	3					2	0	1	3	2		2
		3	0					0	2	2	2	2		4
		4	1					1	3	0	0	6		0
		0	2					0	1	1	0	1		1
		3	1					5	0	0	1	2		0
		1	0					2	0	1	0	3		2
		1	4					3	3	3	0	1		0
		3	3					0	0	0	0	7		0
		0	0					0	3	5	1	0		0
		3	0					0	3	2	3	5		0
		1	3					6	0	1	0	3		1
		3	2					0	0	2	2	0		2
		0	3					3	5	0	7	2		3
		5	1					1	0	3	0	0		1
		1	4					0	0	1	1	2		2
		1	0					0	1	0	0	4		0
		0	0					3	1	1	0	3		0
		5	2					6	3	1	4	2		0
		2	0					1	0	2	0	0		2
		0	3					4	4	2	0	5		1
		3	1					5	2	3	0	1		0
		2	2					1	1	0	0	4		0
		1	5					1	2	0	1	1		1
		4	0					1	0	2	4	2		0
		2	4					3	0	0	4	3		3
		3	1					4	1	0	1	3		0
		5	3					1	0	0	0	0		0
		2	3					5	0	0	1	3		0
		1	2					6	1	3	2	3		1
		1	3					0	0	0	1	3		4
		4	0					0	0	0	1	4		1
		0	4					10	0	0	4	4		0
		0	1					5	2	0	2	1		1
		3	0					0	0	1	1	5		2
		3	1					4	0	1	0	6		4
		0	2					2	3	2	0	0		0
		9	1					3	0	1	0	0		3
		4	0					8	0	0	1	2		1
		0	1					0	2	0	2	5		1
		4	4					1	0	4	1	1		1
		1	4					0	3	0	0	3		2
		0	0					0	0	1	1	2		0
		1	0					3	4	2	0	7		0
		0	1					1	1	0	0	1		0
		4	0					2	1	4	0	1		1
		0	0					0	0	1	0	1		0
		0	0					0	1	1	0	7		0
		0	0					1	1	4	0	3		1
		2	0					2	0	1	0	0		2
		5	2					4	0	0	1	2		1
		2	0					3	0	3	0	7		0
		0	3					0	0	0	2	1		3
		3	2					6	1	3	0	1		3
		2	3					1	3	2	0	2		0
		1	0					1	0	0	0	2		1
		0	4					1	0	0	1	5		2
		2	3					0	0	1	2	1		1
		1	1					4	0	1	1	5		0
		1	3					1	0	1	1	3		3
		0	0					2	0	1	2	0		4
		2	1					2	0	1	2	0		0
		4	1					1	1	0	2	1		4
		3	3					1	0	0	2	6		0
		1	0					7	2	1	1	1		1
		3	2					0	0	7	4	2		1
		3	2					1	2	0	3	5		4
		3	4					2	1	0	0	5		0
		5	3					0	1		1	4
		0	0					0	4		4	5
		1	1					0	0		2	6
		2	0					0	1		1	2
		2	5					5	0		0	0
		0	0					0	0		0	7
		1	0					1	0		0	4
		0	0					0	0		1	3
		1	0					4	3		1	2
		6	0					0	0		2	4
		1	1					0	0		0	3
		0	3					0	3		0	3
		2	2					0	1		3	1
		2	0					4	1		1	3
		2	1					1	2		1	3
		0	0					2	1		2	2
		1	1					0	1		1	5
		1	2					2	1		1	1
		7	0					2	4		0	5
		0	2					2	1		0	4
		7	0					5	0		1	0
		1	0					0	0		1	3
		1	1					2	0		2	3
		0	0					1	0		1	2
		0	7					0	0		0	3
		2	0					2	2		1	4
		1	2					3	2		2	1
		3	1					2	0		0	4
		3	0					0	0		1	3
		6	2					5	3		2	2
		0	1					0	0		1	0
		2	0					0	3		2	3
		3	1					2	2		6	2
		5	1					2	3		1	2
		0	3					4	4		7	3
		0	0					4	0		0	4
		2	0					1	1		0	4
		2	2					1	3		0	6
		0	2					1	0		0	3
		3	0					2	2		0	4
		4	0					0	2		0	2
		2	0					2	0		0	3
		1	0					2	1		1	10
		1	7					0	2		3	2
		2	3					3	1		1	1
		0	3					4	2		1	0
		1	0					0	0		0	0
		4	2					1	0		1	7
		0	2					0	2		4	4
		1	0					0	1		0	6
		1	1					2	0		1	2
		0	0					5	0		1	0
		1	1					2	1		1	5
		0	2					3	0		0
		0	0					2	1		3
		2	1					7	0		1
		0	2					3	0		1
		0	2					1	2		6
		2	1					1	2		4
		0	0					2	0		1
		1	0					2	0		1
		3	1					0	2		2
		3	0					4	0		0
		0	0					1	1		0
		1	1					0	1		0
		1	0					0	0		2
		1	0					0	0		2
		3	3					4	2		1
		2	1					0	1		0
		1	3					1	1		0
		2	1					0	2		2
		1	2					0	0		0
		3	1					2	0		3
		5	1					0	0		0
		1	2					2	0		2
		5	1					5	0		3
		0	3					1	5		0
		0	0					6	2		0
		7	1					0	0		1
		2	2					1	0		1
		0	0					1	1		1
		2	0					1	3		0
		0	0					0	2		1
		0	1					0	0		1
		2	0					3	5		0
		4	3						2		2
		1	2						3		0
		2	1						0		0
		1	1						1		2
		2	2						1		1
		1	3						3		0
		2	4						0		1
		1	0						1		1
		1	1						1		2
		1	0						1		0
		3	6						0		0
		5	1						0		4
		4	1						0		1
		1	1						2		1
		3	5						0		2
		1	2						0		2
		2	1						1		3
		3	3						1		0
		0	1						1		1
		6	2						0		2
		2	0						1		0
		1	2						4		0
		1	2						3		0
		2	1						2		2
		1	1						0		0
		0	0						0		3
		3	0						0		3
		1	0						2		1
		2	1						0		1
		4	1						0		2
		2	0						0		1
		1	5						0		1
		1	1						2		4
		5	2						1		3
		0	0						2		2
		4	1						0		1
		1	1						0		0
		3	2						2		2
		2	3						2		2
		0	2						0		0
			2						0		2
			3						0		1
			0						3		2
			3						0		0
			3						0		2
			2						1		2
			0						2		0
			2						0		0
			1						1		1
			1						0		4
			2						1		5
			0						2		1
			0						0		2
			3						0		1
			0						0		0
			2						0		1
			0						4		0
			3						2		0
			0						2		0
			0						1		1
			0						4		1
			3						3		0
			3						1		3
			2						4		2
			2						1		0
			3						2		0
			1						1		1
			2						1		2
			5						0		2
			1						2		0
			1						0		1
			1						0		0
			3						1		1
			0						1		4
			0						0		1
			1						2		0
			0						0		2
			0						0		0
			2						1		4
			0						1		1
			0						1		1
			0						0		0
			5						3		2
			4						1		0
			2						1		0
			0						1		0
			2						2		2
			1						0		0
			5						0		1
			1						2		3
			1						1		1
			3						0		0
			3						0		2
			2						1		0
			2						1		1
			0						0		1
			1						2		8
			1						0		2
			0						0		2
			1						1		3
			0						2		0
			0						4		5
			1						3		0
			0						0		1
			0						1		2
			0						3		2
			1						0		0
			3						2		1
			1						2		1
			5						4		0
			3						3		0
			1						0		0
			2						3		0
			2						1		0
			0						0		2
			3								1
			3								1
			0								2
			4								1
			0								0
			0								3
			3								0
			2								2
			1								2
			3								0
			3								1
			0								2
			1								2
			1								0
			0								0
			0								1
			2								1
			1								0
			0								4
			0								0
			2								1
			3
			3
			3
2	4	0	0	7	2	1	1	2	0	0	0	8	2	0	4
1	3	0	1	6	4	2	0	6	4	0	3	5	4	2	2
3	4	1	1	5	3	3	1	2	0	1	0	3	4	1	0
5	0	0	2	6	4	0	2	1	1	0	0	6	1	3	1
5	1	0	0	4	5	2	2	2	0	0	1	1	4	4	0
1	2	0	1	2	6	2	3	0	0	2	1	7	4	2	1
0	6	0	0	8	3	2	0	0	0	2	5	7	3	2	3
1	2	0	0	5	1	1	0	2	0	0	1	0	0	0	0
4	2	1	1	4	0	2	3	1	1	5	2	0	2	3	1
5	1	2	1	2	0	1	1	2	2	1	0	6	3	1	1
1	2	0	0	5	0	3	3	2	0	0	6	6	2	3	0
5	0	1	2	4	4	3	4	0	1	0	6	0	2	2	3
6	1	1	0	4	0	3	1	1	3	1	3	3	2	1	1
1	3	1	1	7	3	0	6	0	0	2	3	4	1	1	5
0	2	4	3	7	3	0	2	0	1	0	2	2	2	1	0
2	0	3	0	4	0	3	0	0	0	0	0	6	1	2	2
1	2	1	1	6	2	2	0	0	1	1	0	1	4	0	3
3	0	4	1	6	4	4	3	0	4	0	2	0	2	1	1
4	2	2	2	6	3	7	0	3	0	0	2	1	1	1	4
1	5	0	1	7	0	2	2	0	3	0	1	3	0	0	6
3	2	0	0	13	3	2	0	4	0	0	0	6	3	0	3
2	2	0	2	5	3	2	1	0	3	0	2	6	3	0	1
6	3	2	1	7	4	0	2	1	2	1	1	5	3	0	1
5	0	3	0	4	2	0	3	0	0	5	2	6	2	0	1
5	2	1	3	5	0	2	5	0	0	0	0	0	2	0	1
2	0	1	2	10	1	3	2	3	2	1	3	6	1	0	4
5	0	1	0	7	2	1	1	0	1	0	2	8	5	2	2
0	3	2	1	12	2	0	4	2	0	2	1	2	1	1	1
2	0	1	0	3	4	1	1	2	0	0	0	6	1	1	0
4	0	0	1	3	4	0	4	5	2	0	0	4	1	1	2
4	0	0	1	8	4	0	2	2	1	0	1	4	0	6	4
1	0	0	3	9	0	1	3	0	1	3	0	5	1	3	2
0	1	4	0	6	3	1	0	0	0	2	1	2	0	2	1
0	2	1	1	5	5	5	0	0	2	3	3	5	3	0	0
7	5	2	1	5	3	1	4	0	3	0	0	0	2	0	1
4	2	3	0	8	1	2	1	0	0	0	1	0	3	3	2
0	2	1	0	2	5	3	2	0	0	4	1	2	0	3	1
0	0	1	4	9	1	4	0	1	0	0	0	23	2	3	0
7	0	2	0	4	1	6	3	1	0	0	0	8	2	4	3
3	0	2	2	6	1	1	0	0	2	1	0	5	2	1	1
3	2	0	0	5	4	3	1	3	1	0	1	3	1	0	2
5	3	0	0	6	2	1	4	0	2	0	0	3	0	2	0
4	3	4	0	1	3	0	5	1	1	0	0	1	0	2	1
3	4	0	1	4	4	1	2	0	1	1	1	3	2	2	2
3	2	5	0	2	6	3	2	5	0	1	1	1	2	1	2
2	0	3	0	3	0	5	0	0	0	0	0	3	2	0	2
6	1	0	0	9	3	1	1	0	0	0	0	5	1	1	2
1	1	0	3	0	3	1	1	0	0	0	0	7	6	1	0
3	2	1	0	5	5	0	3	1	2	1	1	7	1	0	1
4	0	0	0	11	4	0	3	0	2	3	0	3	1	2	5
4	3	0	0	7	0	4	0	6	1	3	0	5	0	2	2
3	0	5	0	5	2	1	0	0	5	0	0	5	4	0	0
4	1	0	1	4	3	2	7	1	0	1	0	3	2	2	0
2	2	0	0	10	2	4	0	0	1	0	1	4	4	1	2
5	1	1	0	4	2	4	2	2	5	1	0	3	1	2	0
1	0	3	0	5	6	2	4	0	4	0	0	8	3	0	2
5	1	2	1	4	0	0	1	3	3	1	0	6	2	2	0
5	2	1	1	7	1	2	1	4	1	3	0	6	5	0	0
5	3	1	2	5	3	0	0	1	2	1	0	5	2	1	3
0	0	5	0	3	4	0	1	2	1	0	2	7	1	3	2
2	2	0	0	5	5	2	0	1	0	0	0	3	1	0	2
4	0	3	2	5	2	1	0	1	3	1	2	6	2	2	0
9	0	0	1	3	0	1	0	1	2	3	1	0	0	1	0
5	1	0	0	5	4	1	1	2	1	1	1	0	1	4	3
2	2	3	0	8	2	1	1	3	5	0	1	6	3	5	3
1	0	0	1	6	6	3	2	0	1	3	1	3	2	3	2
2	1	1	1	6	39	0	1	4	1	0	1	4	3	3	1
2	0	3	1	2	5	4	3	0	0	2	1	7	1	4	3
0	3	1	0	6	3	3	3	1	0	2	2	6	0	0	0
2	1	0	1	4	2	2	1	1	1	2	2	7	1	2	0
0	0	0	1	4	4	3	2	1	1	2	1	8	4	2	3
1	3	3	0	11	2	1	1	6	1	3	3	7	4	3	0
2	1	1	0	4	4	4	3	0	0	1	0	2	3	1	2
5	0	0	1	7	4	2	1	1	2	2	3	3	5	1	1
3	0	5	2	6	0	0	1	2	1	0	0	3	1	3	1
3	1	1	0	3	4	2	1	3	1	1	2	5	5	4	2
1	4	5	1	11	9	2	3	0	3	3	0	6	1	2	0
4	2	1	2	6	5	4	2	0	0	3	0	5	0	0	3
6	3	2	0	5	2	4	1	1	1	0	0	3	1	2	1
1	1	1	0	7	0	3	1	3	0	2	0	0	1	0	0
1	0	0	0	4	0	2	5	1	1	1	1	4	1	1	0
4	3	1	2	8	6	0	2	0	1	0	0	2	1	0	2
4	2	0	0	5	2	3	0	2	2	0	5	5	3	2	1
0	1	0	0	7	2	0	1	2	0	0	1	9	1	1	3
4	1	0	0	0	1	2	1	3	0	1	2	5	2	0	3
6	0	0	0	5	0	2	1	0	1	1	2	9	0	1	2
3	5	0	0	7	1	0	0	2	3	0	1	2	1	4	0
4	0	3	0	6	3	4	2	3	0	2	2	1	0	3	0
0	1	1	2	3	4	4	1	4	0	2	0	9	2	0	4
6	3	0	0	4	3	4	0	3	0	1	0	6	1	2	2
2	2	0	1	3	1	1	3	0	0	0	0	7	3	3	1
5	1	1	0	10	3	0	3	3	3	3	1	8	1	4	0
2	0	2	0	8	1	0	3	1	1	0	0	0	4	0	0
0	0	2	0	3	2	2	1	1	0	2	0	3	0	3	0
3	1	0	0	3	2	3	3	2	1	0	1	8	1	2	0
1	5	0	1	4	2	2	2	0	1	1	1	4	4	3	0
0	3	0	0	4	4	2	0	2	2	1	2	7	5	4	3
2	3	2	4	3	2	0	2	5	0	0	1	4	0	3	1
9	4	0	0	4	0	2	5	0	2	0	0	2	1	0	0
4	0	1	1	5	2	1	1	4	0	2	0	4	4	1	5
5	3	1	0	3	0	3	4	3	1	0	1	3	0	2	3
6	4	0	1	5	5	0	4	1	3	0	2	5	0	0	0
3	1	1	0	2	1	5	2	1	1	0	1	7	0	1	3
0	1	1	2	2	3	4	1	3	2	2	0	6	1	2	0
4	1	2	0	3	1	2	1	0	1	2	0	1	1	0	2
1	0	0	0	2	1	5	2	1	0	1	0	7	2	1	3
4	1	3	0	5	2	2	1	1	0	0	1	1	0	1	6
2	0	0	0	1	4	6	0	0	1	0	1	5	3	1	2
5	0	0	0	4	4	0	1	1	1	0	1	4	2	0	0
1	2	2	2	5	1	1	2	1	1	0	0	6	3	3	5
4	0	2	2	4	5	4	1	0	0	0	2	6	5	2	2
2	0	2	0	6	5	3	1	3	3	0	0	5	2	0	2
0	2	0	0	5	4	3	1	3	0	0	1	6	4	3	4
0	1	0	2	3	1	5	0	1	0	1	2	2	4	2	2
4	0	0	0	4	3	2	0	1	2	1	0	6	2	3	3
1	0	0	2	4	3	3	3	0	3	3	0	7	3	2	5
3	1	2	0	6	2	6	2	2	0	1	0	4	1	0	4
4	0	0	0	7	1	1	3	1	0	6	0	1	7	2	3
2	1	1	1	4	2	0	0	0	0	0	2	0	0	0	0
5	4	0	2	2	3	0	5	1	3	0	0	2	2	1	0
9	1	0	0	5	4	0	0	3	0	2	0	4	3	2	2
4	2	0	1	2	2	2	5	0	0	6	2	2	2	1	3
3	1	2	0	6	2	5	4	0	4	1	2	4	3	4	0
3	2	0	2	4	0	1	0	3	0	0	0	6	1	0	1
4	2	0	0	8	1	1	0	5	2	0	1	0	2	0	2
4	1	0	1	2	3	6	1	3	3	3	0	4	1	0	0
3	2	0	2	4	3	4	0	2	0	0	0	2	4	2	3
0	1	1	0	6	0	4	2	3	1	0	0	4	0	2	2
4	1	2	2	8	0	3	0	2	2	1	1	5	2	0	3
0	3	1	2	3	0	0	5	2	0	0	0	4	1	1	0
6	1	0	1	5	5	2	2	5	0	0	1	3	1	0	1
3	2	1	3	6	2	1	0	0	0	2	0	5	0	3	3
1	1	3	2	5	6	5	3	2	0	1	0	3	4	5	1
4	0	0	3	5	4	1	3	2	0	1	2	6	1	1	3
4	5	1	1	6	1	0	2	1	0	3	2	11	2	1	2
6	0	0	1	6	3	0	1	1	1	2	2	4	0	3	1
0	2	0	0	6	1	0	2	3	2	1	3	8	0	3	1
2	0	0	0	7	3	4	2	2	0	1	0	2	0	3	0
4	3	0	0	6	1	3	1	0	0	1	0	2	2	1	0
5	1	2	0	5	3	0	3	3	0	1	0	7	5	2	1
2	4	0	0	3	2	4	4	0	1	2	0	7	2	0	2
1	1	0	1	7	3	2	0	2	3	0	1	5	3	5	3
3	0	0	0	4	0	4	0	0	0	1	0	11	1	3	5
3	0	1	0	2	0	4	0	0	0	0	2	6	3	2	0
8	7	1	0	8	2	3	2	5	0	3	1	4	3	2	0
1	0	4	2	5	5	2	4	4	0	2	1	5	5	1	0
1	5	1	0	5	1	0	0	4	1	1	3	2	3	2	1
3	0	0	3	7	6	1	0	0	0	0	0	9	0	4	2
8	1	0	0	4	0	0	4	0	0	3	0	5	1	2	1
5	2	0	1	4	4	4	1	1	1	1	0	8	3	0	1
1	2	1	0	3	4	3	1	3	2	1	0	3	0	2	2
5	1	2	1	6	5	6	1	0	0	0	0	2	6	0	2
1	0	2	1	4	0	1	0	3	0	2	5	4	2	2	1
4	0	0	2	4	3	3	0	0	0	1	2	3	2	2	2
4	0	2	3	3	6	1	2	0	1	2	1	0	3	9	1
2	3	1	1	5	8	2	0	0	2	0	0	2	4	0	7
1	1	0	0	7	5	6	1	1	1	0	1	5	3	5	0
3	1	0	2	5	4	2	0	2	0	0	0	10	2	4	1
4	0	0	2	5	4	1	1	1	2	1	0	1	0	3	1
0	0	0	1	5	4	4	0	0	5	1	0	5	2	2	2
5	2	0	1	2	1	2	2	3	0	4	2	2	4	1	1
1	5	0	2	4	1	5	0	0	1	0	0	7	3	3	2
1	1	3	1	8	3	1	1	0	0	0	0	1	4	2	2
3	1	2	1	7	0	1	1	1	2	2	0	6	1	1	4
1	4	3	3	2	6	3	0	2	1	0	1	2	0	0	0
3	2	2	1	7	1	2	0	2	2	0	2	4	3	1	4
5	2	1	3	5	0	0	1	2	0	1	0	2	2	0	1
4	6	1	0	4	4	4	1	1	1	0	0	3	3	0	3
3	1	0	2	1	0	5	3	2	5	0	2	4	3	2	3
1	2	0	1	5	3	2	1	2	1	0	0	2	2	1	1
6	5	1	0	6	1	1	0	0	1	0	1	4	3	1	2
3	1	0	0	7	4	1	0	2	1	3	0	8	0	4	2
0	2	1	0	7	0	3	0	0	4	1	1	1	4	2	4
5	2	0	0	1	2	4	0	4	0	1	0	0	0	3	0
3	3	1	3	2	5	3	0	2	0	2	0	5	2	3	1
0	2	0	0	8	2	3	0	0	1	0	3	3	1	4	0
4	0	0	0	7	2	4	0	4	0	1	0	5	2	1	4
0	0	0	2	5	0	0	0	2	2	0	3	4	2	4	0
2	1	0	1	5	2	3	1	1	1	0	0	3	0	5	4
3	3	3	0	4	1	2	0	4	0	0	5	6	0	3	2
3	0	0	0	7	1	0	0	1	3	2	0	7	1	3	0
3	1	0	1	5	4	2	0	2	1	0	0	3	3	0	1
4	1	2	0	2	3	3	0	0	1	2	0	2	2	2	3
1	1	0	1	3	0	4	0	1	2	0	0	5	1	1	2
1	2	0	1	5	1	2	0	6	1	1	0	2	0	2	1
1	1	2	0	7	2	0	0	3	1	0	0	5	0	2	3
3	5	0	2	5	4	3	0	1	2	2	0	3	1	1	2
1	0	4	0	9	0	2	0	2	1	0	1	0	0	0	0
1	2	1	1	4	1	2	0	1	2	0	0	2	7	0	0
1	1	2	0	5	0	1	0	3	1	0	3	3	2	3	3
4	0	3	0	5	2	1	2	1	2	2	2	1	3	3	0
6	0	3	2	6	1	1	1	0	1	0	2	7	0	0	1
5	2	1	2	3	3	5	0	1	5	0	0	4	3	2	0
4	0	2	0	5	0	5	1	5	2	2	1	3	2	2	0
2	1	2	3	4	2	1	0	0	4	1	2	1	1	3	0
0	2	0	0	7	3	0	0	7	4	3	4	4	0	0	2
6	3	1	3	8	3	1	2	0	2	1	1	8	1	1	0
4	2	2	1	2	5	0	4	0	1	0	0	6	0	0	2
0	1	3	0	4	1	2	4	4	0	0	2	6	4	0	0
5	2	1	1	2	5	3	2	0	1	1	0	2	1	0	2
1	4	0	0	4	1	1	0	1	0	3	0	5	0	0	0
0	0	3	0	9	1	3	2	0	1	0	3	2	3	2	0
0	0	0	3	6	0	1	0	1	1	1	3	2	1	0	2
4	2	2	4	5	3	2	0	0	1	0	1	3	4	5	0
6	4	2	0	2	1	2	1	0	0	0	0	7	2	0	3
4	8	0	1	2	4	1	0	2	2	0	0	3	3	2	0
3	0	2	0	6	2	3	2	1	2	0	3	7	4	2	1
4	1	2	2	6	1	1	2	2	0	1	0	6	0	5	2
1	0	0	0	4	3	0	1	0	5	1	2	7	4	3	3
1	1	0	2	1	5	1	2	5	2	0	1	1	1	3	0
2	3	0	0	5	3	3	0	1	0	1	1	3	0	1	0
0	2	3	0	4	0	3	2	1	0	1	0	7	8	0	3
5	1	0	1	6	4	0	2	1	1	0	0	1	0	4	4
5	2	1	2	2	3	2	1	3	0	1	0	7	2	3	3
0	4	0	0	4	0	2	0	2	2	0	0	6	2	0	2
7	1	2	1	4	1	2	2	1	1	1	1	2	3	1	0
1	2	0	0	6	4	5	0	0	0	0	0	4	1	1	2
3	1	1	0	6	3	1	4	1	0	0	0	6	0	0	2
3	2	1	2	7	0	0	0	0	0	0	0	8	1	5	0
1	0	4	2	4	0	1	2	0	0	0	1	4	0	0	0
3	0	2	3	5	0	2	2	0	1	1	0	5	0	0	3
0	1	2	1	1	4	5	6	2	1	0	0	7	1	0	5
4	2	1	0	1	2	3	4	1	0	2	0	3	2	2	2
3	2	0	1	4	0	0	5	0	0	2	0	3	1	2	0
4	4	0	1	8	1	7	1	6	0	1	0	5	0	4	1
2	3	4	2	6	2	4	1	0	0	1	0	4	0	2	6
1	0	0	2	6	5	0	2	2	0	0	0	8	4	3	4
5	1	5	0	3	4	2	5	2	0	1	0	7	2	0	2
5	2	1	1	4	1	3	2	1	1	1	3	7	2	2	0
6	0	2	0	5	7	5	7	0	0	1	2	2	0	5	0
1	3	3	0	3	0	1	2	1	2	0	0	1	2	3	2
6	3	0	1	3	3	4	0	0	4	0	0	5	3	5	1
1	0	4	0	2	4	3	1	1	0	0	0	4	2	1	1
3	0	0	0	5	1	2	2	1	1	0	0	5	3	4	3
4	1	1	2	2	6	5	2	0	0	2	0	6	1	0	3
2	2	1	0	3	2	3	3	0	1	2	1	5	1	1	0
3	2	1	0	2	4	1	0	1	0	0	2	5	0	1	2
0	1	0	0	5	2	4	1	0	0	2	0	5	3	3	0
1	1	0	0	3	4	9	1	3	0	1	0	2	2	1	0
0	1	2	0	3	1	6	0	0	1	0	1	7	3	0	0
1	5	5	0	6	2	1	2	6	0	1	1	5	1	0	1
4	0	4	1	6	1	4	5	3	2	0	0	7	3	0	0
4	0	3	0	5	0	4	0	3	0	1	1	3	3	2	0
2	1	3	0	2	2	0	4	0	1	0	2	6	3	2	1
0	1	1	0	6	2	5	1	1	0	2	1	7	0	2	0
2	5	0	0	4	5	4	3	1	0	1	1	7	2	6	2
2	0	0	0	4	3	2	2	0	1	2	0	6	2	4	2
2	1	2	1	0	0	2	3	0	1	1	0	11	0	1	3
0	2	1	1	2	4	0	3	1	2	1	1	6	0	0	0
2	4	0	1	4	1	4	1	1	1	0	0	4	3	0	2
2	0	2	1	2	1	2	2	2	0	0	3	4	1	4	6
1	1	2	2	3	2	3	1	1	2	0	0	6	2	0	0
0	0	6	1	4	2	5	5	0	1	2	0	7	6	2	2
0	1	1	1	11	3	1	0	0	0	1	2	8	1	4	0
1	1	0	0	9	3	4	0	6	0	0	1	7	1	0	1
1	0	1	1	5	0	0	4	0	2	1	0	2	1	0	0
3	1	1	0	7	0	1	3	1	0	0	1	1	3	4	1
10	2	1	1	4	2	1	4	2	2	2	1	6	0	1	0
2	1	2	0	7	2	3	2	3	4	0	2	10	5	1	0
3	2	0	0	4	0	3	2	2	0	1	0	4	2	2	6
0	0	3	1	7	2	3	0	0	1	0	0	7	2	1	0
5	0	0	0	2	3	3	1	0	0	0	0	4	2	2	0
0	0	1	2	5	0	2	1	0	2	0	0	0	1	0	4
2	1	0	1	0	0	4	0	0	0	1	1	2	0	3	1
5	2	0	2	3	3	2	1	0	3	0	0	7	6	0	0
1	3	0	0	0	0	1	1	1	1	0	1	2	0	0	1
3	3	8	0	7	2	3	2	0	0	1	0	0	2	1	6
5	1	0	1	6	2	2	1	3	1	0	1	2	4	1	2
5	4	2	4	8	1	1	2	1	1	2	1	0	4	7	4
3	3	2	1	7	4	2	2	2	0	0	0	6	0	2	1
2	2	1	1	5	1	6	8	2	2	0	2	4	1	1	0
2	3	5	1	2	4	1	2	1	0	2	0	1	2	2	1
0	1	1	2	3	1	2	2	2	2	0	0	3	1	0	4
2	1	2	0	1	2	2	3	6	2	1	3	8	2	2	4
1	0	1	0	5	2	2	2	0	0	0	0	3	3	5	2
2	4	2	1	0	4	3	3	1	2	0	4	2	1	4	0
5	1	0	1	0	3	3	2	0	0	0	2	5	1	4	1
3	3	4	1	10	0	0	4	1	1	4	1	1	0	4	3
3	2	2	3	2	1	3	0	0	1	1	1	6	3	4	1
0	6	1	0	0	1	2	0	2	2	0	1	1	3	1	2
1	0	2	3	3	3	3	2	3	2	2	0	3	0	0	2
1	3	4	0	4	6	4	3	2	0	4	0	5	3	3	2
1	2	2	1	3	3	1	5	1	0	1	1	2	1	3	1
4	2	0	2	4	2	5	2	2	0	0	0	3	5	2	1
8	3	2	0	3	2	3	3	1	1	0	1	2	4	0	3
1	0	2	0	6	2	1	3	0	1	2	0	6	2	0	1
6	1	1	0	8	1	3	0	0	1	2	1	3	2	0	2
1	6	0	3	5	1	3	2	2	1	0	1	5	1	4	1
2	1	3	1	8	3	1	4	1	0	0	1	2	1	2	2
0	6	2	1	6	3	2	2	1	2	3	0	5	0	0	0
3	0	1	1	8	5	5	0	0	0	1	1	1	3	2	0
4	1	1	0	4	1	4	1	0	0	0	1	0	1	3	2
5	1	1	3	6	4	5	0	4	0	3	1	3	3	1	0
5	3	0	0	7	1	0	5	0	0	1	0	6	4	3	1
1	3	0	1	1	6	0	7	0	0	0	0	7	1	1	2
4	2	1	2	5	2	2	1	0	2	0	1	1	1	0	0
2	5	3	2	8	0	0	1	0	0	0	1	4	1	3	3
1	2	2	0	7	8	0	2	4	0	0	1	3	2	1	3
3	0	1	1	9	3	4	2	0	0	0	0	3	1	0	1
4	2	2	4	0	0	4	1	1	1	4	0	5	1	1	2
2	1	0	0	0	5	1	0	4	1	2	0	1	1	3	1
1	1	3	0	9	1	1	1	1	1	2	0	2	2	1	1
0	1	1	2	6	3	0	1	1	2	0	1	7	3	3	2
2	1	3	0	6	3	0	1	1	0	0	0	2	3	2	2
4	0	2	2	3	5	0	0	1	2	3	2	4	3	0	1
7	1	2	2	3	4	2	0	1	1	1	0	4	3	0	2
5	1	2	1	2	3	1	3	1	2	2	1	5	2	2	1
0	3	1	0	8	2	0	3	3	1	1	0	3	1	1	2
2	2	1	0	9	8	1	2	3	4	2	0	6	5	2	1
1	1	2	0	6	2	0	3	6	0	0	2	7	1	2	4
4	4	6	1	6	0	2	0	6	2	1	1	7	2	3	2
0	0	1	2	4	1	0	0	1	3	4	0	1	0	0	1
4	1	2	1	5	2	4	0	0	0	1	0	7	2	0	0
5	4	2	1	1	0	2	1	4	0	1	1	8	2	3	2
1	2	1	0	9	1	2	0	1	0	2	3	4	3	2	1
4	0	0	0	4	3	2	2	4	4	0	1	10	1	2	2
3	2	7	1	8	3	0	0	0	1	0	0	1	1	3	1
3	2	2	2	6	2	7	4	1	0	1	1	5	0	4	0
2	4	1	2	6	3	3	0	0	0	1	0	6	1	1	1
0	2	0	0	5	2	1	0	0	0	0	0	4	1	2	3
1	0	0	0	5	0	4	0	0	0	2	1	2	2	2	2
4	0	4	0	6	2	3	0	2	0	1	1	6	3	0	3
3	0	0	4	5	1	1	0	1	1	0	0	5	0	1	2
2	0	7	0	5	0	2	0	9	0	1	3	1	3	0	0
6	0	0	0	4	7	0	0	1	2	0	0	9	1	1	0
7	3	1	0	4	1	3	0	4	0	0	0	4	4	2	0
4	0	0	0	6	0	3	2	1	1	1	0	4	5	1	0
4	2	1	0	9	3	2	1	1	2	0	0	7	2	2	0
2	3	0	0	5	1	2	0	1	1	1	0	2	3	3	1
6	0	2	1	6	2	0	4	2	0	1	0	6	0	0	2
3	0	0	1	5	4	0	1	3	1	0	1	7	0	4	0
2	0	0	1	9	4	2	2	1	2	0	0	4	2	1	0
4	1	1	0	2	2	3	4	0	0	0	2	5	0	2	2
2	3	3	2	0	6	2	1	1	0	0	0	5	0	0	2
2	2	1	1	1	1	1	0	3	2	2	1	8	2	3	1
0	1	1	0	5	2	2	0	2	2	3	3	5	1	4	3
0	2	0	0	6	0	0	1	4	0	0	0	3	4	0	1
0	1	6	3	6	2	2	3	2	0	0	0	2	3	3	1
1	0	0	2	6	3	3	2	0	1	0	0	4	3	0	3
2	0	3	1	7	0	2	0	3	3	1	0	5	1	0	2
2	1	1	0	3	2	2	3	0	0	0	1	7	3	3	9
5	0	0	2	6	4	4	0	3	3	4	1	3	1	3	3
2	2	6	1	12	3	0	0	2	5	0	1	7	3	1	3
4	2	0	1	1	4	2	6	3	2	0	0	5	3	4	0
5	0	2	0	4	3	1	2	0	1	1	2	1	0	3	0
0	3	0	1	7	4	3	2	0	0	0	3	5	4	0	4
4	3	5	0	6	3	4	4	0	1	2	3	6	0	4	0
2	5	0	1	4	0	1	2	0	1	1	2	4	6	4	4
4	0	2	2	0	1	0	1	0	1	0	5	9	0	3	2
0	6	1	0	7	2	3	0	2	0	2	1	7	5	2	2
3	2	2	0	9	3	2	0	4	5	0	1	1	0	1	2
4	1	1	1	11	1	0	2	0	0	3	1	7	3	5	4
0	2	1	0	2	2	2	5	0	1	1	0	7	3	0	1
3	2	0	0	8	0	1	4	1	3	2	3	6	3	1	2
1	0	0	2	3	4	2	0	5	0	1	0	1	0	2	1
1	3	0	1	6	0	3	2	1	2	0	0	3	1	2	1
2	0	1	0	5	2	0	0	4	5	0	0	3	2	0	4
4	0	0	0	3	2	5	0	0	0	0	1	4	1	2	1
1	0	0	0	3	3	5	4	0	0	0	1	6	0	2	2
2	0	1	2	2	2	0	3	0	0	0	0	6	1	4	1
1	1	0	0	7	2	2	1	1	2	2	0	7	0	0	0
2	1	0	2	5	4	0	2	2	1	0	4	5	0	1	4
1	1	3	2	6	3	2	2	1	0	0	0	8	2	1	0
0	3	1	1	7	5	3	4	5	10	0	1	2	6	0	2
2	0	1	3	6	3	1	2	0	2	0	0	5	5	0	1
4	1	1	1	4	4	0	2	0	0	0	3	0	0	3	1
0	2	5	1	7	3	4	0	0	5	0	1	7	2	0	3
0	1	0	3	5	2	3	1	3	0	0	0	4	0	0	0
1	1	2	1	6	5	1	0	3	1	1	2	2	4	0	0
1	4	2	0	5	0	0	3	2	0	0	0	6	0	3	2
5	0	3	2	3	3	0	2	2	0	0	0	4	2	1	1
0	2	2	0	7	3	1	5	3	0	1	2	4	3	4	2
7	2	6	0	5	2	3	0	0	2	2	2	1	2	1	1
1	1	0	2	7	1	1	0	7	2	0	0	4	2	0	0
0	6	0	0	4	4	2	3	3	1	2	0	6	1	0	3
0	0	1	0	7	4	1	1	1	1	5	0	7	2	2	1
5	1	0	1	3	5	4	0	0	0	0	0	2	0	3	4
2	1	0	3	1	0	4	2	0	1	0	0	7	3	1	2
2	6	0	0	3	2	5	1	2	0	0	0	6	0	2	0
4	0	0	0	4	2	3	3	1	0	0	0	2	0	1	1
2	3	1	0	2	0	2	3	5	1	1	0	2	2	3	0
3	0	0	0	4	0	0	0	4	1	0	0	7	2	1	2
1	0	2	2	8	3	3	4	0	0	3	3	6	1	0	1
3	0	2	1	6	4	2	1	0	4	1	0	2	4	2	0
1	0	0	2	5	3	0	3	0	1	5	1	6	4	1	0
3	2	3	0	4	4	2	3	6	2	1	0	4	2	2	3
5	3	1	2	8	0	7	3	0	2	1	0	6	1	1	1
3	0	1	2	6	1	0	0	2	2	1	0	4	0	1	2
0	5	0	1	8	1	3	2	2	4	1	0	0	1	5	0
1	0	0	0	4	1	1	0	0	1	0	1	4	1	1	0
2	0	2	1	1	1	0	2	4	0	0	0	5	2	1	1
2	4	6	0	5	2	1	4	0	1	2	1	7	5	0	1
2	1	1	0	5	1	3	4	1	1	0	1	0	0	3	3
2	3	0	0	8	5	2	2	0	1	2	1	1	1	2	0
0	4	0	5	9	2	4	0	1	2	0	1	3	1	0	0
3	0	1	1	5	1	0	0	1	4	1	0	0	3	3	2
4	0	3	0	0	2	0	3	1	0	0	3	7	0	1	2
2	0	0	0	0	1	3	2	1	3	1	1	0	4	2	2
2	1	1	0	7	2	3	1	4	4	1	1	0	0	2	3
4	1	0	0	4	0	0	4	3	0	0	1	6	5	0	2
3	2	1	0	8	2	2	3	2	1	0	2	6	3	3	1
5	2	0	1	3	4	1	1	1	1	0	0	1	2	1	1
2	0	0	2	4	4	3	2	0	1	0	1	1	0	3	0
1	1	0	0	2	3	2	0	4	2	1	0	5	2	1	0
3	1	0	4	6	2	3	1	1	1	0	0	4	4	2	1
0	1	6	0	4	1	4	0	7	0	2	2	5	2	2	1
0	0	3	1	2	3	1	5	2	3	2	0	4	2	4	1
2	0	2	2	3	0	4	0	3	3	0	0	6	3	3	0
1	1	1	0	4	0	4	2	2	3	1	2	4	3	1	0
5	2	0	2	3	3	2	0	3	1	0	0	1	4	2	1
2	3	0	1	3	0	5	2	7	0	0	0	9	8	2	3
0	1	2	0	7	2	0	0	4	0	1	2	10	2	2	4
0	4	3	2	5	3	0	1	0	0	0	0	5	0	1	0
1	2	4	0	7	4	3	0	0	1	0	2	1	3	4	0
1	1	0	0	5	0	5	0	2	5	2	0	4	1	6	0
0	2	0	0	3	2	2	3	1	1	0	0	3	0	2	2
0	0	3	1	7	3	0	2	1	4	0	0	6	3	1	3
0	2	0	2	8	4	1	1	2	0	1	1	1	0	2	1
[truncated: 1,520 more rows]

## Sheet: Figure5_FS  1-C
1A11_% nuclei with PNAs
I-PpoI (24 h + recovery)	0d R	1d R	2d R	5d R	DNA PKi 0 d R	DNA PKi 1 d R	DNA PKi 2 d R	DNA PKi 5 d R	B02 0 d R	B02 1 d R	B02 2 d R	B02 5 d R	DNA PKi+B02 0 d R	DNA PKi + B02 1 d R	DNA PKi + B02 2 d R	DNA PKi + B02 5 d R
I	12.8205	13.6364	11.4286	7.7821	12.2642	19.2469	15.7895	11.0132	8.1448	7.6555	3.86266	2.43902	8.95522	12.3853	11.9149	7.82609
II	9.09091	9.32203	5.36913	5.78231	8.41751	12.6667	9.83051	6.33333	1.55763	1.24611	1.71233	1.60256	3.21543	4.30769	3.49206	5.19878
III	10.6452	17.2507	13.6364	7.21003	12.3028	13.0293	13.9456	10.9718	5.43807	5.2459	5.90164	3.0303	4.51613	12.3839	9.83051	9.1195

## Sheet: Figure5_FS 1-D
WB RAD51 KD
	log2		siNC1d	esiRAD51 1d
		I	0	-4.51103
		II	0	-3.68664
		III	0	-4.48933
	FCH		siNC1d	esiRAD51 1d
		I	1	0.0438574
		II	1	0.0776624
		III	1	0.0445224
	rad/Tub		siNC1d	esiRAD51 1d
	original data	I	2.02377	0.0887574
		II	2.82047	0.219044
		III	0.90983	0.0405078

## Sheet: Figure5_FS  1-E
Detection of LIG4 mRNA after LIG4 KD
		log2		siNC 1d	esi Lig4 1d
			I	0	-3.29
			II	0	-2.405
			III	0	-2.22167
			IV	0	-2.53333
				siNC 1d	esi Lig4 1d
			I	1	0.102238
			II	1	0.188809
			III	1	0.214394
			IV	1	0.172739
