# Supplementary material for: Topological stress triggers persistent DNA lesions in ribosomal DNA with ensuing formation of PML-nucleolar compartment
Source: eLife. 2024 Oct 10;12:RP91304. doi: 10.7554/eLife.91304 (PMC11466457; doi:10.7554/eLife.91304)
Supplement: Figure 5—figure supplement 2—source data 1. [file elife-91304-fig5-figsupp2-data1.xlsx]

## Sheet: Figure5_FS 2-C
% of nuclei with >35 gH2AX foci/nucleus
I-PpoI (SD--> Shield doxycyclin)	1d SD siNTpool	I1d SD B02 siNTpool	1d SD esiRAD51	I1d SD esiLIG4	1d SD B02 esiLIG4	1d SD siNTpool	I1d SD B02 siNTpool	1d SD esiRAD51	I1d SD esiLIG4	1d SD B02 esiLIG4
147-II	0.25641	0	4.87805	5.79151	6.78733	0	0	14.0845	7.07547	9.0535
147-III	1.01833	0.862069	6.17977	6.91057	13.6126	0.581395	0.655738	16.3265	16.4609	9.52381
147-IV	1.9685	1.12359	13.4615	7.27273	11.4094	5.91133	1.38408	21.3836	24.4681	13.5
147-V	0	0.657895	11.1111	0.934579	14.8936	5.24691	1.24224	28.1879	22.5664	25.3968
Mock (DMSO)	1d DMSO siNTpool	1d DMSO B02 siNTpool	1d DMSO esiRAD51	1d DMSO esiLIG4	1d DMSO B02 esiLIG4	1dR DMSO siNTpool	1dR DMSO B02 siNTpool	1dR DMSO esiRAD51	1dR DMSO esiLIG4	1dR DMSOB02 esiLIG4
147-II	0	0	2.04082	2.07715	6.25	0	0.17331	2.53807	1.12994	2.92208
147-III	1.95036	1.66205	4.5977	3.68098	12.987	0.263852	0.650054	15.5797	9.7561	10.6742
147-IV	7.69231	5.95238	8.33333	7.82123	12.069	5.53506	4.68165	23.0769	16.2162	16.4179
147-V	1.33333	1.77515	2.77778	6.72269	27.2727	0.107991	0.238095	20.0627	5.51724	5

## Sheet: Figure5_FS 2-D
% of nuclei with 0-2.5 gH2AX foci/nucleus
I-PpoI (SD--> Shield doxycyclin)
biological replicate	1d SD siNTpool	I1d SD B02 siNTpool	1d SD esiRAD51	I1d SD esiLIG4	1d SD B02 esiLIG4	1d SD siNTpool	I1d SD B02 siNTpool	1d SD esiRAD51	I1d SD esiLIG4	1d SD B02 esiLIG4
147-II	31.7949	61.017	60	55.5985	61.9909	53.4413	57.3846	45.3521	50.4717	51.0288
147-III	15.0713	26.2931	57.3034	71.5447	69.1099	23.2558	32.7869	47.3469	46.0905	61.3095
147-IV	6.69291	11.985	9.61538	0.909091	26.8456	2.70936	18.6851	0	10.6383	21
147-V	18.232	40.7895	55.5556	61.6822	64.8936	15.7407	29.1926	33.557	32.7434	37.5661
