# Supplementary material for: Topological stress triggers persistent DNA lesions in ribosomal DNA with ensuing formation of PML-nucleolar compartment
Source: eLife. 2024 Oct 10;12:RP91304. doi: 10.7554/eLife.91304 (PMC11466457; doi:10.7554/eLife.91304)
Supplement: Figure 5—source data 1. [file elife-91304-fig5-data1.xlsx]

## Sheet: Figure 5B
% of nuclei with PNas after ATM/ATR inhibition
biological replicate	MOCK 24h	ATMi ( 60009) 24h	ATRi 24h	ATMi (55933) 24h
23-revize1- I	15.9	2
23-revize1- II	17.22	2.96
23-revize1- III	14.82	1.29
24-03-1	21.43	1.1	1.84
24-03-2	14.2361		1.06383
PV_146-1	11.076		1.94805
24-03-3	8.9701	1.3289	0.977199	1.10701
24-03-4	9.44882			1.14068
24-03-5	13.5593			2.86885

## Sheet: Figure 5D
1H4_concatenated	Number of 53BP1 foci in nucleus_I-PpoI + inhibitors of DNA repair pathways																GraphPad
S+D 0d R	S+D 1d R	S+D 2d R	S+D 5dR	S+D DNAPKi 0d R	S+D DNAPKi 1d R	S+D DNAPKi 2d R	S+D DNAPKi 5d R	S+D BO2 0d R	S+D BO2 1d R	S+D BO2 2d R	S+D BO2 5 d R	S+D DNAPKi BO2 0d R	S+D DNAPKi BO2 1d R	S+D DNAPKi BO2 2dR	S+D DNAPKi BO2 5d R		Freq_dist_%_(histogram)
0	1	1	3	7	4	3	6	0	1	0	0	4	3	0	0
0	1	3	4	6	0	1	0	0	1	2	1	2	3	4	0
4	2	1	1	7	1	3	1	1	2	0	3	0	5	3	0		Bin Center	S+D 0d R	S+D 1d R	S+D 2d R	S+D 5dR	S+D DNAPKi 0d R	S+D DNAPKi 1d R	S+D DNAPKi 2d R	S+D DNAPKi 5d R	S+D BO2 0d R	S+D BO2 1d R	S+D BO2 2d R	S+D BO2 5 d R	S+D DNAPKi BO2 0d R	S+D DNAPKi BO2 1d R	S+D DNAPKi BO2 2dR	S+D DNAPKi BO2 5d R
6	3	2	4	4	6	5	1	5	1	1	1	4	3	3	2		0	17.1129	25.8615	32.8321	35.3134	3.44698	13.905	24.1021	29.0674	29.9252	39.8756	40.3554	49.0826	7.22417	26.4103	26.9103	33.3179
2	1	2	0	6	2	2	1	2	1	1	0	7	5	3	2		2	33.4498	44.405	45.7931	46.2094	17.0476	37.4515	45.5104	44.9334	40.5059	41.8663	42.7828	41.5793	25.5692	41.5751	45.1458	47.0425
1	5	0	3	3	5	2	0	0	4	2	0	9	0	3	3		4	29.414	21.7762	17.0784	14.2435	30.4609	31.0078	20.7939	19.3379	21.197	15.0544	14.0442	7.7654	28.1524	23.5897	21.0779	15.1571
1	3	2	0	7	3	0	0	3	1	1	3	6	1	2	1		6	15.2503	6.74956	3.58038	3.51165	29.8614	12.4031	6.80529	5.0868	6.94692	2.79938	2.16732	1.50721	23.2049	6.52015	5.50019	3.78928
1	0	2	0	6	2	1	0	6	0	1	1	5	3	4	4		8	3.95809	1.10124	0.644468	0.361011	14.837	3.97287	2.26843	1.25151	1.06876	0.37325	0.563502	0.0655308	11.0771	1.4652	1.07051	0.554529
1	3	0	0	6	2	0	1	4	3	0	0	3	1	2	1		10	0.620877	0.106572	0.0716076	0.361011	3.44698	0.872093	0.330813	0.242229	0.285002	0.0311042	0.0866927	0	3.63398	0.14652	0.036914	0.0462107
3	2	1	1	5	0	3	0	3	1	0	1	6	2	2	5		12	0.194024	0	0	0	0.749344	0.193799	0.047259	0.0807428	0.0356252	0	0	0	0.875657	0.03663	0.110742	0
5	1	2	0	9	2	2	1	3	5	0	2	7	4	1	5		14	0	0	0	0	0.149869	0.0968992	0.094518	0	0.0356252	0	0	0	0.131349	0.03663	0	0
2	6	1	0	8	3	4	1	4	4	4	2	0	6	3	2		16	0	0	0	0	0	0	0	0	0	0	0	0	0.0875657	0.03663	0.036914	0
3	0	2	0	2	4	4	0	1	3	0	1	5	3	4	2		18	0	0	0	0	0	0.0484496	0	0	0	0	0	0	0	0	0.036914	0
4	4	0	2	5	3	0	0	3	3	2	0	6	6	0	3		20	0	0	0	0	0	0	0	0	0	0	0	0	0.0437828	0.03663	0	0.0462107
8	5	0	3	6	4	5	1	3	1	2	0	2	4	1	4		22	0	0	0	0	0	0.0484496	0	0	0	0	0	0	0	0	0	0
4	1	0	0	6	2	5	0	2	0	0	1	4	5	0	1		24	0	0	0	0	0	0	0	0	0	0	0	0	0	0	0	0
2	3	3	1	4	2	0	1	2	0	3	0	6	3	4	0		26	0	0	0	0	0	0	0.047259	0	0	0	0	0	0	0	0	0
3	5	2	0	4	1	3	2	3	0	1	2	1	6	0	5		28	0	0	0	0	0	0	0	0	0	0	0	0	0	0.0732601	0.036914	0.0462107
5	5	4	2	5	1	1	4	1	1	0	0	6	4	4	2		30	0	0	0	0	0	0	0	0	0	0	0	0	0	0	0.036914	0
7	4	2	1	6	5	1	3	2	1	4	1	2	0	3	1		32	0	0	0	0	0	0	0	0	0	0	0	0	0	0.03663	0	0
3	0	0	0	5	2	3	1	4	4	0	3	0	3	5	2		34	0	0	0	0	0	0	0	0	0	0	0	0	0	0.03663	0	0
1	1	1	1	5	1	4	0	1	1	0	1	4	0	3	4
8	2	3	6	8	6	1	5	0	2	1	3	5	2	4	2
6	5	0	1	4	5	0	6	1	0	1	0	2	3	1	2
2	5	1	1	1	3	0	3	0	0	1	4	5	3	3	3
2	1	1	1	7	3	1	2	3	4	0	0	3	2	1	1
4	1	1	1	0	7	1	0	0	1	0	0	1	6	1	2
6	4	2	1	6	5	0	2	1	3	0	1	2	4	4	2
0	2	2	0	1	6	1	3	0	2	0	0	3	3	3	0
4	0	1	0	5	0	0	0	6	3	2	0	3	0	2	4
5	2	4	0	3	8	3	1	6	1	0	1	4	4	1	1
0	1	3	3	4	4	0	0	7	0	0	0	5	2	5	3
2	3	1	1	5	2	5	4	3	4	1	1	3	3	0	0
3	2	1	5	5	1	2	2	3	0	1	0	7	4	2	2
1	1	2	1	7	1	4	0	4	2	0	0	6	2	2	3
1	4	7	2	4	1	1	0	2	1	1	0	9	5	7	6
1	4	1	2	6	2	1	0	3	1	1	1	6	5	4	5
4	6	1	1	6	1	0	4	1	9	3	0	4	2	2	1
4	4	4	2	7	1	3	1	0	1	1	0	6	4	2	0
2	2	4	0	4	2	0	0	2	2	2	1	9	4	4	0
1	0	3	2	8	2	3	2	4	4	0	1	1	2	0	2
3	3	1	0	6	4	3	3	0	1	1	0	2	9	0	2
5	0	0	4	3	2	0	1	3	3	0	2	4	3	4	2
0	4	1	2	4	4	4	0	2	4	1	2	1	4	0	3
3	6	5	0	8	4	3	2	1	5	1	0	4	1	3	2
3	3	0	0	7	4	4	1	3	1	0	1	7	2	3	2
5	4	0	0	2	1	1	0	2	0	1	1	0	4	0	2
6	2	1	1	5	1	5	1	0	1	1	0	7	0	5	1
2	4	1	1	0	2	0	4	0	0	4	1	3	3	7	4
0	2	2	2	11	3	0	2	0	2	2	0	2	2	2	0
2	6	1	0	2	10	1	3	0	3	0	0	5	4	1	5
5	3	5	1	4	1	3	1	4	3	0	0	3	5	2	0
1	3	0	2	6	0	3	6	3	1	2	0	5	2	6	0
6	1	1	1	4	2	3	0	0	0	0	1	2	0	3	1
0	3	3	3	5	3	0	0	4	3	0	0	6	5	4	3
0	2	1	1	2	5	2	1	1	1	1	0	2	6	0	1
0	2	1	0	1	2	3	0	0	2	2	1	4	2	2	1
3	5	2	1	2	1	4	1	3	1	1	1	1	2	1	3
4	2	5	1	7	2	1	1	7	4	0	0	5	1	0	2
6	3	1	1	3	3	0	2	4	0	3	0	5	4	2	1
0	0	0	1	7	6	4	3	0	0	1	2	4	1	3	0
4	2	5	1	3	2	5	2	4	3	0	0	10	3	3	1
3	1	0	0	4	3	2	6	2	1	3	2	6	5	0	0
5	6	2	0	3	1	0	1	4	1	2	0	4	3	1	4
1	2	1	1	7	2	1	3	3	0	2	0	5	2	6	1
7	1	2	3	7	1	2	2	1	0	0	0	7	2	4	1
4	7	1	0	8	7	4	0	1	2	1	0	8	13	0	2
2	3	3	0	7	5	0	1	2	2	1	1	5	2	4	0
0	0	1	0	11	7	0	1	0	0	0	0	5	4	0	2
1	0	3	3	8	1	1	1	0	7	0	0	7	3	5	3
5	1	1	2	4	7	4	4	0	4	0	0	2	2	3	3
4	2	1	1	6	5	3	0	1	0	0	2	1	6	0	0
4	3	1	3	6	4	3	3	0	0	3	1	8	1	1	0
1	0	0	3	1	4	3	2	5	0	2	2	7	5	2	0
4	2	3	1	4	0	1	1	5	1	0	1	7	2	4	0
5	3	4	2	5	2	4	1	6	1	1	1	4	2	2	6
3	3	1	1	3	3	0	3	0	0	0	0	5	1	0	0
2	2	1	0	5	2	5	6	3	4	3	0	7	3	1	1
7	1	2	0	5	1	5	0	1	2	0	2	7	4	0	4
6	0	1	1	4	4	3	4	0	0	4	3	7	2	4	0
6	7	6	1	6	2	4	0	4	0	1	0	8	5	4	2
3	1	2	1	7	1	5	1	1	3	0	0	1	0	2	5
1	0	0	0	7	3	3	3	6	3	2	1	8	1	2	2
7	4	1	2	6	4	4	1	3	2	1	1	6	1	0	3
2	0	1	0	7	3	5	3	0	1	0	0	2	4	1	0
10	5	0	1	8	3	2	2	2	1	1	1	1	1	2	3
5	2	0	3	6	2	2	0	2	0	1	0	5	2	3	3
1	3	1	2	4	4	0	1	5	3	2	1	8	2	2	4
8	1	1	0	6	0	4	1	2	0	2	2	5	5	1	2
5	2	1	1	7	3	3	4	2	0	0	1	5	3	2	2
0	5	1	2	7	1	0	4	3	3	0	1	3	8	0	2
6	0	1	2	5	3	0	1	3	3	2	2	2	2	4	0
0	5	4	2	4	4	4	0	5	0	4	0	3	3	3	1
0	0	2	3	6	7	2	1	1	0	4	1	8	0	1	0
6	3	3	0	7	3	4	1	5	0	0	0	2	6	1	0
4	0	0	1	7	3	5	5	1	2	5	0	4	1	1	0
2	2	1	1	6	4	4	4	4	1	0	0	8	0	4	0
6	1	0	0	2	5	2	4	5	1	1	1	2	2	0	0
0	3	0	2	8	3	4	2	2	2	2	3	5	5	1	2
4	2	4	0	4	3	0	1	1	1	2	2	12	3	1	0
1	3	4	0	2	2	1	4	1	0	0	1	5	4	4	0
5	2	3	3	10	5	2	0	4	1	4	1	5	0	4	0
2	3	5	0	5	1	7	1	1	0	4	0	8	2	5	2
2	3	2	2	4	5	3	0	1	2	1	0	12	3	1	1
5	4	3	3	0	0	5	2	2	4	2	0	2	8	0	1
1	5	0	1	1	6	0	0	4	5	0	0	3	2	3	0
7	2	1	0	6	3	3	4	4	4	2	1	5	3	6	2
2	1	2	1	10	2	2	3	4	2	1	3	0	5	4	0
0	3	4	0	5	6	2	1	4	1	0	1	3	2	4	2
6	2	0	1	3	2	2	0	3	1	0	0	3	7	2	0
6	3	3	2	6	4	0	2	2	3	1	0	3	1	4	1
3	1	2	2	4	1	0	2	2	1	0	1	2	1	5	1
4	0	0	1	0	3	5	2	2	2	1	3	2	0	0	2
2	0	3	1	2	0	0	3	5	0	1	0	2	1	5	10
0	5	4	1	4	1	1	4	1	2	0	1	4	2	0	0
2	0	1	0	4	3	2	0	3	2	1	0	6	3	3	0
0	0	2	0	7	1	0	1	4	1	1	1	6	0	0	1
5	2	0	2	5	1	2	2	2	1	4	0	1	7	0	3
2	2	0	5	9	4	0	1	0	0	1	1	7	5	2	4
1	6	1	3	6	2	0	3	5	1	0	2	11	7	2	1
3	0	2	0	5	6	3	2	3	0	0	0	4	1	1	4
1	2	1	1	3	2	6	1	0	4	0	0	0	1	0	5
7	0	1	1	5	3	6	0	4	0	2	1	8	4	2	4
1	0	2	0	2	2	0	2	3	2	1	0	2	33	1	4
4	5	2	1	3	1	0	5	0	0	1	0	4	1	6	1
1	0	3	3	4	4	4	2	0	2	2	0	3	2	4	5
5	1	3	1	6	3	0	7	4	4	0	3	1	1	1	2
0	1	0	1	6	0	1	1	1	0	2	0	3	2	2	1
0	2	5	2	4	7	4	1	1	6	0	1	1	3	2	2
6	3	4	2	6	5	3	2	4	0	6	0	9	1	3	4
6	0	1	1	8	3	5	8	0	1	0	3	4	3	2	3
4	0	3	0	3	0	4	0	1	1	0	1	6	1	1	1
3	4	0	0	5	2	2	0	3	3	3	0	2	3	5	2
3	0	3	2	7	1	3	1	6	1	1	0	6	0	2	1
4	3	2	4	6	3	0	2	2	0	2	1	5	2	5	3
6	1	1	1	5	4	1	0	5	2	2	1	6	1	1	2
5	4	1	0	2	1	1	4	4	2	3	2	4	3	2	1
2	0	3	0	4	2	0	7	0	1	1	3	5	3	1	3
3	0	2	2	3	5	1	1	1	1	0	0	3	5	4	2
0	2	4	2	4	7	1	0	3	0	0	4	8	0	5	1
5	1	0	2	4	4	0	0	1	6	0	2	5	2	4	0
6	0	4	1	7	8	5	0	2	1	0	0	4	2	0	3
7	0	1	0	4	4	2	0	3	1	3	1	4	4	0	2
2	0	3	1	5	4	3	4	0	4	1	2	11	3	3	2
4	0	4	9	4	1	2	1	4	0	0	1	6	1	0	4
8	1	2	1	3	12	1	0	3	3	0	1	5	2	0	2
2	1	6	3	8	5	2	2	2	4	0	2	9	3	1	0
8	2	2	3	0	0	0	2	4	4	4	2	6	2	2	0
4	1	0	1	5	7	1	1	3	2	0	1	6	4	1	4
5	5	3	3	2	2	2	1	5	3	2	1	4	3	1	3
4	5	3	2	4	4	2	2	5	1	0	0	3	4	0	2
1	3	0	2	3	2	0	0	0	3	5	1	6	3	0	5
5	0	4	0	5	3	1	0	0	2	1	0	10	3	1	5
0	3	3	6	7	2	3	2	0	1	0	1	4	3	3	2
0	3	4	0	2	3	3	2	3	0	0	0	5	6	0	2
6	0	7	1	6	5	1	5	3	2	1	1	10	3	3	3
1	4	2	3	6	1	2	0	2	0	0	0	3	5	2	1
5	3	3	0	5	8	3	0	1	4	1	0	8	6	4	5
2	2	1	1	6	2	1	0	9	1	1	1	2	3	1	0
8	0	0	1	3	2	4	6	9	1	1	0	4	2	0	5
0	0	4	2	4	5	3	0	3	1	0	0	6	3	2	2
11	0	3	1	8	4	2	2	2	2	0	0	5	1	1	2
3	2	7	0	4	4	1	1	0	4	0	3	4	1	1	3
4	1	0	4	7	6	0	0	0	2	0	3	6	3	0	1
6	3	0	3	5	6	5	3	3	0	0	3	4	3	1	2
0	3	1	0	7	1	3	0	1	3	1	0	3	4	0	3
1	2	0	0	4	1	2	2	2	1	4	1	3	3	5	2
6	0	2	0	4	2	3	1	3	3	2	0	4	1	0	2
2	0	1	0	4	2	1	0	5	0	1	2	3	2	1	0
0	0	0	2	6	2	3	2	5	0	1	2	7	2	4	1
6	2	1	4	8	2	1	0	4	1	1	3	5	3	0	0
6	5	1	1	6	4	1	1	1	1	4	0	3	7	0	2
6	2	0	2	2	0	6	0	0	3	1	1	5	5	1	3
2	3	2	1	4	3	2	2	1	6	1	2	6	7	0	0
4	2	0	0	7	4	1	0	0	1	0	0	6	6	1	2
3	1	0	0	11	3	0	2	2	0	0	1	6	5	3	2
5	3	1	1	6	4	4	9	4	3	2	2	5	2	2	1
4	3	2	0	7	8	3	1	2	1	0	0	3	4	2	0
3	4	3	2	5	1	0	0	0	0	1	0	1	2	0	0
5	7	0	2	6	4	0	5	4	1	1	0	11	2	0	5
1	1	3	4	6	4	3	1	0	1	1	0	7	4	2	5
6	0	2	0	6	1	0	0	4	0	2	2	9	0	1	1
2	5	4	4	9	4	0	0	3	1	4	2	8	1	0	1
5	5	1	3	5	4	3	0	6	2	1	0	5	2	4	2
5	3	4	5	6	5	0	5	2	1	0	0	2	8	8	4
3	3	2	0	4	4	5	3	5	0	0	1	3	1	2	1
2	0	4	2	9	6	2	1	3	3	1	0	3	4	1	0
4	5	2	3	9	7	5	0	2	1	0	0	7	3	2	4
0	4	0	0	11	4	1	0	0	0	1	2	6	4	4	1
1	5	2	2	1	2	2	0	5	1	0	3	2	2	1	3
3	2	2	0	7	0	2	0	1	0	3	3	2	2	4	3
2	1	2	3	6	2	1	0	0	1	1	0	3	7	0	2
2	4	3	0	5	3	1	3	2	1	0	1	6	1	1	2
1	3	4	1	4	3	3	2	1	0	0	2	5	1	1	0
4	3	0	1	5	4	0	2	0	0	0	1	7	0	5	0
5	2	4	0	4	5	3	1	1	0	5	2	4	1	4	3
2	5	4	0	4	1	1	1	0	0	2	1	4	1	0	3
7	2	0	0	4	3	0	0	4	0	0	1	3	6	6	2
1	3	0	0	3	1	0	2	4	0	1	0	4	3	0	6
1	1	0	2	3	3	0	2	1	2	0	0	5	0	2	2
5	0	1	0	6	2	0	1	2	0	1	0	4	4	7	1
5	1	0	0	5	0	2	1	4	3	0	2	5	3	4	2
4	0	1	0	7	8	3	0	2	1	1	1	6	4	2	0
4	1	0	1	4	7	2	0	7	1	0	0	6	1	3	0
1	5	0	7	5	2	6	0	1	3	0	0	9	4	1	3
3	5	5	1	4	1	1	0	1	0	1	0	2	3	0	6
2	3	2	0	5	3	3	0	3	1	0	0	4	5	5	1
0	1	1	0	4	1	2	0	1	0	1	0	3	6	2	1
6	0	3	1	2	0	5	0	5	1	0	1	5	3	6	1
0	5	1	2	7	2	2	3	1	2	2	5	9	3	2	1
6	7	2	2	5	3	3	1	6	1	0	0	4	1	3	0
1	6	2	1	4	3	1	0	2	0	2	0	8	2	1	0
1	3	4	1	6	3	5	0	0	2	4	0	7	5	2	2
0	5	2	0	4	8	5	0	1	2	1	1	4	4	2	1
3	0	3	1	9	3	3	0	0	1	1	2	5	2	0	2
0	2	3	1	4	5	2	0	0	0	1	1	5	3	3	1
6	0	2	3	3	3	6	3	0	0	0	0	4	1	3	0
0	0	0	0	4	3	2	0	5	0	2	2	6	5	1	2
4	4	1	0	3	2	3	0	6	2	8	0	7	1	6	0
4	0	3	2	10	2	2	0	3	0	2	5	2	3	1	1
7	3	4	0	7	2	2	0	2	1	0	0	1	5	1	4
4	0	0	4	7	4	3	0	0	1	1	1	6	4	3	8
0	5	1	0	6	2	4	0	0	2	0	0	0	4	7	2
1	1	0	1	3	3	1	2	1	3	0	1	7	5	0	0
4	8	3	0	4	1	3	2	8	3	0	0	2	3	4	0
7	2	1	0	0	9	6	2	1	2	0	2	5	4	1	2
0	2	1	3	4	2	3	1	0	3	5	1	5	4	2	3
0	6	0	2	7	3	4	4	1	2	0	1	3	1	4	6
9	2	1	0	6	4	4	2	0	2	0	0	3	1	1	0
0	2	0	4	8	5	1	0	1	4	1	0	5	2	5	0
4	1	2	0	8	3	0	0	4	0	1	0	1	2	3	0
1	3	0	1	8	3	5	4	5	0	2	0	2	2	7	0
0	1	1	2	8	4	0	6	0	0	2	2	3	1	0	6
4	4	4	0	3	1	2	2	1	3	0	1	4	3	1	7
5	1	6	0	3	1	2	4	3	4	3	0	3	3	2	1
2	4	1	1	6	2	1	2	0	1	0	0	6	0	0	0
3	3	2	3	1	5	3	0	5	2	2	0	15	2	3	1
8	5	4	2	8	3	2	1	2	3	0	0	1	0	6	0
5	0	1	1	4	0	3	2	2	1	2	2	5	4	1	1
1	2	1	3	7	2	3	1	5	0	3	0	4	1	0	0
5	4	1	2	4	0	1	1	3	2	1	0	7	7	2	3
2	0	2	2	3	0	3	1	1	7	1	0	3	6	2	2
3	3	3	0	1	7	2	4	0	0	1	0	4	3	2	3
4	2	1	0	2	6	3	1	3	2	0	1	7	0	3	1
7	2	0	0	5	2	0	2	0	0	0	1	1	4	6	3
4	1	0	4	6	0	0	0	2	0	2	0	7	2	5	1
3	1	1	2	6	4	4	8	2	4	0	0	7	3	2	0
2	3	0	2	3	0	3	0	2	0	0	1	2	3	17	4
5	3	2	3	7	4	1	1	0	0	0	1	8	2	2	0
0	3	0	1	6	6	0	0	4	0	5	2	5	1	3	6
4	2	3	0	4	1	3	1	2	1	5	1	1	5	3	0
3	0	4	3	6	1	3	1	0	3	0	0	5	2	4	1
4	2	2	1	12	1	3	1	0	6	1	3	5	5	5	2
4	2	1	4	4	2	5	3	0	3	1	0	2	7	1	0
5	3	3	0	0	4	1	1	2	3	3	4	5	3	0	0
2	2	0	0	5	5	1	4	1	0	1	0	1	3	1	0
2	4	6	1	6	8	2	2	1	1	2	1	8	1	0	3
5	2	3	0	7	4	1	4	0	0	3	0	5	0	1	0
0	4	4	1	6	3	8	2	6	2	1	1	8	1	0	1
7	1	0	1	5	6	2	3	1	0	0	0	5	1	2	0
1	1	3	0	2	7	1	2	0	0	0	0	7	2	0	0
5	4	7	1	7	5	3	1	2	0	0	1	2	0	1	2
4	4	4	1	7	5	1	2	4	2	0	2	6	0	2	5
0	1	0	3	13	2	2	3	1	2	0	0	3	0	0	6
7	4	4	1	3	3	1	2	2	3	0	1	5	1	1	0
1	3	1	4	4	3	4	6	0	2	2	1	8	0	4	0
2	2	0	0	7	1	0	0	4	2	3	2	1	2	0	0
6	0	0	3	5	3	6	0	7	0	3	2	2	4	2	0
5	1	3	2	5	0	0	1	0	3	1	1	4	1	1	1
3	2	3	3	4	5	1	0	0	1	0	0	1	4	2	0
0	5	0	3	6	5	3	0	1	2	2	1	3	2	3	4
4	1	2	2	3	1	4	0	4	5	1	1	8	0	5	4
2	3	3	1	10	4	4	1	4	0	1	0	2	2	2	2
3	1	3	1	9	1	3	0	1	1	0	1	5	4	2	1
1	4	1	3	8	5	2	4	1	0	1	0	1	8	4	2
4	0	0	2	6	4	1	1	3	2	0	1	3	0	1	1
4	1	2	1	5	4	1	1	1	0	0	2	4	1	3	0
0	0	3	0	3	3	0	1	0	0	0	0	2	8	8	3
1	3	3	0	5	4	1	0	2	0	0	1	6	5	2	1
4	1	0	1	4	3	1	2	3	2	0	0	11	4	2	2
0	1	1	1	6	1	4	0	0	3	4	1	3	2	1	2
4	4	3	2	3	4	0	1	3	3	3	0	6	4	0	0
8	2	1	0	6	4	2	1	2	3	1	0	9	0	8	1
4	6	0	2	4	2	1	1	0	3	0	0	7	1	3	3
5	2	2	1	2	3	4	3	2	0	1	0	4	3	2	1
3	2	2	2	5	0	2	6	4	1	0	1	20	3	1	0
7	1	0	1	3	4	0	1	1	3	0	0	6	6	0	4
2	1	2	0	1	2	1	0	0	2	0	0	14	2	2	2
3	2	3	1	8	0	3	0	3	4	2	0	4	1	1	5
6	0	1	1	2	4	2	5	6	0	0	1	5	1	3	7
7	0	4	3	1	5	0	0	0	1	0	2	5	0	2	2
6	2	0	1	3	1	4	1	4	0	2	0	11	3	3	0
5	1	1	4	5	4	1	1	0	0	0	1	5	5	0	1
4	0	3	0	6	7	0	1	0	3	0	2	2	2	1	7
4	4	2	0	8	1	2	5	1	2	2	3	6	1	3	0
1	2	1	2	4	2	2	0	1	0	3	0	8	1	3	4
5	2	1	1	3	0	1	0	0	4	0	3	4	1	3	2
4	1	1	1	6	5	3	5	1	0	1	0	1	1	6	1
3	1	0	1	3	6	0	1	1	4	3	3	7	3	2	0
4	2	1	0	3	5	1	2	1	0	2	3	8	2	2	0
10	2	3	2	8	5	3	1	1	4	0	1	7	5	0	3
1	5	2	0	6	4	1	1	2	0	0	3	8	2	0	1
1	8	1	0	7	3	2	3	0	1	3	0	7	3	2	0
3	2	0	1	6	2	1	0	0	0	2	0	6	0	6	0
0	3	0	1	2	5	4	0	0	2	1	1	9	4	2	1
1	5	0	2	8	6	4	1	3	0	3	2	3	2	5	1
4	1	1	1	6	1	6	2	1	0	0	1	3	5	0	1
7	3	0	2	7	1	3	0	1	0	0	0	6	2	1	5
3	1	1	0	6	4	2	0	1	0	2	2	4	4	4	2
4	1	0	1	6	9	6	2	3	2	3	0	6	5	0	1
2	6	1	2	11	0	2	3	4	4	1	3	6	4	0	1
1	2	0	1	7	3	3	2	5	2	0	0	3	1	2	4
4	1	2	3	5	5	2	0	2	2	1	0	5	6	4	0
8	2	3	0	3	3	4	1	0	0	1	2	4	1	3	0
1	3	3	3	9	4	2	2	3	2	0	0	2	4	6	2
4	1	2	0	1	1	4	2	2	0	1	0	6	4	2	4
1	3	3	1	6	1	4	1	3	0	1	0	6		2	2
1	3	0	2	11	1	2	0	2	1	2	1	9		1	0
2	5	1	0	5	3	6	7	4	1	3	1	6		2	0
1	2	1	4	5	2	1	1	0	2	1	4	1		1	0
6	3	2	0	4	4	0	2	1	1	0	0	9		2	0
4	2	2	3	5	0	4	4	0	6	0	1	8		5	3
0	3	1	2	4	1	1	1	0	3	1	3	6		3	0
3	4	0	3	7	2	1	0	1	1	1	0	4		6	1
0	0	0	2	5	5	2	3	1	0	0	1	5		1	0
3	0	0	0	6	7	2	0	1	1	0	2	3		0	4
5	0	7	4	6	21	1	2	0	4	0	1	3		3	0
1	5	2	1	7	5	0	3	1	2	1	0	4		3	0
4	3	4	0	4	2	6	1	8	1	0	1	4		4	2
6	1	2	0	5	3	2	0	0	1	2	0	8		4	0
0	1	3	1	5	2	4	1	2	6	0	1	7		3	2
4	1	2	3	6	5	3	3	2	1	0	0	4		0	1
0	5	4	1	10	5	4	1	1	0	1	2	0		2	3
1	1	0	4	5	2	1	3	10	0	0	0	4		2	0
4	4	4	2	9	2	3	5	1	0	1	2	2		7	0
1	4	0	0	6	7	0	0	4	5	2	2	9		3	2
2	4	1	2	3	3	1	1	6	1	4	2	4		0	3
1	2	4	0	6	2	2	1	0	1	3	1	4		2	3
2	1	0	3	2	1	0	0	1	1	1	0	5		3	1
3	2	0	0	1	1	6	1	0	3	0	0	6		5	0
1	1	0	0	4	3	3	3	2	0	2	1	9		1	0
0	7	2	1	6	2	2	2	8	0	0	5	6		2	0
5	0	1	1	5	3	1	1	4	2	2	4	5		3	3
1	5	1	0	10	5	2	1	3	0	1	0	2		3	4
3	1	5	0	5	4	1	1	0	1	2	2	7		0	0
0	3	2	2	5	1	0	1	4	1	1	0	7		1	2
2	3	3	1	5	3	1	0	4	2	1	0	6		3	0
0	0	2	0	8	1	0	2	3	0	0	2	6		2	1
0	2	5	2	6	5	4	1	0	0	1	0	1		4	3
4	4	0	1	6	2	1	3	0	1	0	0	4		4	3
7	2	0	1	3	2	3	7	1	0	1	1	5		3	0
4	7	3	1	0	0	3	0	3	2	1	0	5		5	2
0	2	2	0	4	4	2	0	1	0	0	0	3		6	0
2	6	0	2	7	1	5	4	2	0	0	1	4		1	5
6	4	1	0	5	2	2	1	2	3	0	0	5		0	1
5	2	3	0	8	4	0	1	0	4	1	0	6		3	2
3	1	0	0	6	1	4	0	1	0	1	3	3		1	0
2	1	2	2	8	0	7	1	2	1	0	2	7		1	5
0	5	2	1	4	3	0	8	5	0	1	2	3		0	8
2	1	1	0	1	3	0	1	3	0	3	2	6		1	1
7	2	2	0	7	3	1	2	1	0	2	0	7		6	0
4	5	3	1	4	4	0	3	2	0	0	4	5		2	1
3	2	3	1	12	3	1	2	6	1	0	2	6		6	0
5	4	0	0	2	3	0	2	4	2	2	0	7		6	4
3	4	1	5	7	1	3	1	2	1	1	0	5		2	0
1	0	1	2	3	4	2	2	1	2	0	1	6		1	4
2	6	1	1	7	5	3	1	0	0	0	1	9		3	0
2	1	2	2	7	4	0	1	1	0	0	1	3		2	1
3	6	4	2	0	3	1	1	3	1	5	0	4		0	1
6	2	0	3	5	7	1	5	4	1	5	2	2		6	3
0	4	0	4	6	1	0	1	3	2	0	2	11		4	2
3	1	0	1	9	2	0	8	2	0	0	0	4		3	2
0	0	1	3	6	5	1	1	0	0	0	1	5		2	2
5	1	2	2	8	0	0	3	1	2	4	1	2		3	0
3	1	2	2	8	5	3	0	3	1	2	1	4		0	2
1	0	2	1	6	7	3	4	4	2	0	2	12		7	5
1	6	1	2	5	4	8	5	2	5	3	0	5		4	2
6	2	2	0	7	6	2	2	0	0	2	1	2		0	2
7	2	0	6	6	4	7	2	2	1	0	2	5		3	0
2	3	1	0	3	6	1	0	2	6	0	0	3		0	1
3	1	1	0	8	0	2	3	0	4	2	0	12		3	5
8	4	2	1	6	1	2	0	1	2	1	2	1		2	1
6	2	2	0	5	2	2	1	3	0	0	1			7	6
3	3	0	0	0	0	2	3	0	4	0	0			6	3
3	3	0	2	5	5	2	0	2	8	2	2			0	1
7	3	4	5	5	4	0	0	0	2	2	1			1	2
5	3	2	1	7	6	4	2	0	3	1	0			2	3
4	0	0	0	0	3	2	2	1	3	0	0			2	0
0	4	1	3	4	1	5	5	4	0	0	3			3	1
2	5	1	0	4	0	1	3	0	2	2	0			4	5
2	5	1	0	7	3	1	3	0	0	3	0			5	1
4	1	1	3	6	3	3	6	0	1	4	0			0	0
7	0	0	1	11	2	0	0	2	1	0	0			0	0
1	2	0	1	2	2	3	0	1	1	0	0			5	3
5	3	2	1	3	4	0	5	0	0	0	1			0	4
3	4	2	8	5	4	2	1	0	3	0	0			1	1
5	2	1	0	12	1	3	3	1	1	0	0			5	1
3	5	0	0	4	0	0	4	0	3	0	0			0	2
0	1	2	1	9	2	0	4	2	2	0	2			4	20
5	2	0	6	6	8	4	3	4	8	3	0			0	5
3	2	4	0	5	1	0	1	1	0	3	2			0	3
5	3	0	2	3	6	2	4	1	1	1	0			28	2
1	1	1	3	7	5	3	3	3	4	1	0			0	5
6	0	1	4	7	2	3	0	1	0	1	1			2	6
3	5	1	2	9	2	4	2	1	0	3	1			0	2
6	5	1	0	6	0	1	2	0	1	3	1			6	1
4	2	4	0	4	0	4	0	4	4	0	0			0	1
4	3	1	2	2	4	1	1	1	1	0	0			4	3
4	5	0	0	6	6	1	3	0	0	0	2			1	2
2	6	4	3	3	4	3	5	1	0	0	2			4	1
0	1	1	0	4	3	1	0	4	0	1	3			2	28
0	3	4	0	3	5	7	0	1	4	1	2			5	2
3	3	4	2	8	1	4	3	0	1	0	1			0	3
6	0	1	2	1	1	0	2	0	3	3	4			1	1
2	1	1	0	4	0	2	4	2	1	1	4			2	2
0	0	1	2	4	6	0	0	5	3	1	2			0	2
3	1	4	2	1	4	2	4	2	4		2			1	3
8	4	3	1	11	3	2	1	0	4		1			3	1
5	2	6	5	6		0	0	1	2		0			2	0
0	4	0	2	8		3	1	9	1		1			1	3
8	0	2	2	3		6	0	0	0		2			6	2
4	0	0	2	2		6	0	4	1		0			3	1
3	0	4	2	3		2	1	1	4		2			7	1
3	2	3	5	2		1	0	4	1		0			4	0
7	2	0	2	3		4	1	2	0		2			0	0
2	1	3	2	0		2	1	1	5		1			2	0
1	0	1	2	4		4	1	1	0		0			0	2
0	2	4	2	4		1	6	2	1		1			4
4	3	1	2	1		0	0	6	1		0			6
4	2	0	0	9		3	0	2	3		1			2
3	1	2	0	2		1	0	3	1		0			1
5	3	1	0	3		0	0	3	5		0			4
5	5	1	3	5		1	1	1	3		2			1
5	0	0	1	3		0	3	3	0		0			3
2	2	6	2	4		3	0	6	0		1			3
2	3	1	0			1	0	6	1		1			1
6	3	2	2				1	4	1		2			0
8	3	3	0				3	1	0		2			4
1	4	1	3				3	0	1		1			2
8	6	1	1				0	2	1		0			5
0	0	0	0				6	0	0		0			1
3	2	4	2				0	3	5		1			5
1	2	3	0				0	1	1		4			5
3	4	1	0				1	2	1		2			0
5	2	2	2				1	1	1		1			1
1	4	3	1				0	6	0		2			2
3	2	3	1				2	2	2		0			6
0	5	3	1				1	2	2		1			1
3	5	3	1				4	2	0		1			2
3	0	2	0				2	6	0		0			4
7	0	0	0				1		5		0			4
3	0	2	0				0		4		0			1
5	1	2	0				1		0		4			0
0	1	0	2				3		0		2			5
3	1	2	1				6		0		0			5
6	1	0	0				1				0			2
5	1	0	0				0				1			6
0	2	1	0				0				0			4
6	4	0	1				3				1			4
4	3	2	0				0				1			1
4	2	0	0				3				0			3
3	1	2	1				2				2			0
3	0	4	0				1				1			4
5	1	2	0				1				1			1
4		1	2				1				1			2
1		2	3				0				1			2
7		1	3				0				0			1
6		3	3				3				2			3
		2	0				0				0			0
		2	3				1				5			3
		1	0				0				0			3
		5	1				3				1			0
		3	0				4				2			3
		1	0				2				1			3
		0	0				1				0			0
		1	1				0				3			3
		2	0				2				1			4
		0	1				3				0			1
		4	3				0				1			0
		0	0				2				2			1
		1	3				0				0			2
		3	0				2				0			3
		2	2				1				0			1
		3	0				5				0			1
		1	3				1				1			0
		2	2				1				4			2
		3	0				1				4			1
		2	0				2				0			1
		1	1				0				2			2
		0	3				3				0			0
		1	1				3				2			0
		6	0				3				0			4
		1	4				3				0			1
		1	5				1				0			0
		1	0				0				0			2
		1	2				3				0			2
		1	3				4				0			2
		2	0				3				0			4
		0	0				5				3			5
		3	1				4				1			2
		4	6				2				1			1
		2	1				2				0			2
		2	1				1				1			1
		2	1				0				0			3
		3	1				0				0			5
		1	1				4				1			0
		0	2				7				0			2
		1	2				1				0			0
		3	3				0				2			4
		0	2				2				0			1
		5	0				2				0			2
		1	0				1				1			2
		0	1				1				0			4
		3	6				0				0			2
		2	0				1				1			3
		4	0				0				4			2
		0	0				2				1			7
		3	0				0				0			0
		2	3				2				1			7
		0	0				1				0			4
		2	1				0				1			2
		2	1				1				0			3
		3	1				3				0			3
		4	0				7				1			0
		3	0				3				0			3
		1	0				0				0			1
		5	6								0			3
		3	0								0			1
		2	0								0			0
		0	0								0			2
		1	1								0			3
		5	0								1			3
		2	0								0			2
		1	1								0			1
		1	4								0			2
		0	3								0			0
		0	0								2			4
		0	3								0			3
		0	0								0			4
		3	1								0			3
		5	3								1			1
		0	1								1			5
		0	1								0			4
		1	1								2			3
		2	4								0			4
		1	0								0			1
		0	3								0			4
		0	0								0			4
		1	0								0			2
		0	0								0			2
		0	1								1			1
		3	1								0
		7	1								0
		6	3								0
		4	1								5
		0	0								0
		3	0								1
		0	2								0
		1	1								0
		2	0								0
		0	0								0
		0	3								0
		1	3								1
		0	1								1
		4	2								0
		1	0								0
		3	1								0
		1	0								0
		0	0								2
		2	2								0
		0	2								2
		3	3								2
		1	1								2
		0	0								1
		1	4								0
		3	0								0
		5	1								0
		1	3								0
		2	0								0
		2	3								0
		7	0								2
		0	0								0
		3	0								0
		5	1								2
		0	1								0
		5	1								0
		1	0								0
		1	2								0
		0	3								0
		3	0								0
		3	2								0
		3	4								0
		1	1								3
		1	0								1
		1	0								1
		0	0								2
		1	0								3
		5	1								0
		2	5								0
		1	0								1
		2	0								1
		0	1								0
		4	1								0
		3	2								0
		2	1								0
		2	0								0
		3	2								4
		0	1								0
		0	1								1
		2	3								2
		2	3								0
		1	1								0
		1	1								1
		3	1								2
		0									1
		3									0
		2									1
		0									0
		0									0
		0									0
		3									1
		1									2
											0
											0
											0
											2
											0
											2
											2
											2
											0
											0
											1
											2
											0
											1
											0
											1
											1
											1
											0
											1
											0
											0
											0
											1
											3
											0
											1
											1
											1
											3
											0
											3
											2
											2
											2
											0
											1
											1
											1
											0
											1
											5
											4
											0
											0
											0
											0
											1
											0
											1
											2
											0
											1
											0
											1
											2
											0
											0
											1
											5
											1
											0
											1
											3
											1
											0
											1
											1
											1
											2
											3
											0
											3
											1
											1
											0
											0
											1
											1
											0
											2
											1
											1
											1
											1
											0
											1
											0
											0
											3
											1
											1
											4
											1
											0
											0
											1
											0
											1
											1
											1
											0
											3
											0
											1
											1
											0
											1
											2
											3
											3
											0
											2
											2
											1
											0
											0
											2
											1
											1
											2
											1
											2
											0
											1
											1
											0
											2
											1
											1
											1
											1
											5
											2
											0
											0
											1
											0
											1
											0
											1
											0
											0
											2
											1
											0
											3
											0
4	3	3	0	2	1	2	3	0	1	2	0	3	2	0	1
3	2	2	2	11	3	0	2	0	2	0	2	1	2	2	1
0	1	4	1	5	6	0	1	2	2	0	0	0	3	1	0
1	1	1	3	2	10	2	2	1	1	0	0	7	3	2	1
4	1	2	1	0	0	1	0	1	1	1	0	3	4	1	2
0	3	0	1	6	2	1	1	3	3	3	1	0	0	0	3
5	1	1	0	4	2	1	1	2	0	2	2	7	1	0	0
1	1	1	1	2	3	2	1	6	2	1	1	3	0	0	0
3	1	0	3	4	0	0	1	1	3	0	1	0	2	2	1
4	0	3	2	0	1	3	0	2	0	4	1	5	2	2	0
2	4	3	0	1	0	4	1	0	1	0	5	0	2	0	1
0	2	0	1	3	0	2	0	0	1	0	0	5	2	0	1
1	4	3	2	0	0	2	0	0	0	0	1	1	4	2	0
6	1	0	0	4	2	0	1	2	0	1	3	7	2	0	2
1	1	0	3	4	3	1	1	2	2	2	2	2	1	0	1
1	0	0	2	6	1	5	2	1	2	0	0	1	2	2	0
2	4	4	5	0	4	1	1	4	0	1	3	5	0	1	2
2	1	4	0	5	5	0	2	4	0	3	1	3	0	3	1
3	2	0	0	6	1	0	4	1	2	0	0	1	1	2	1
4	0	3	3	7	0	0	0	0	2	1	0	1	4	1	1
0	0	3	3	3	4	2	0	2	0	0	0	0	1	1	0
0	1	0	1	2	4	2	3	1	0	2	0	7	3	0	0
4	1	0	0	9	3	1	1	0	3	2	0	6	5	0	4
0	1	0	2	8	3	6	1	1	0	0	2	5	2	0	0
3	1	1	1	8	1	4	0	2	1	3	3	8	0	0	0
2	1	1	0	3	3	1	0	3	0	0	2	4	4	1	0
1	1	2	2	6	3	2	2	1	1	4	0	2	0	0	1
0	1	1	3	3	0	1	1	3	0	4	0	6	4	1	2
2	1	2	0	8	1	3	4	0	0	0	0	4	3	5	1
0	3	1	1	4	5	1	2	4	1	4	0	3	4	3	2
1	3	2	1	2	6	3	0	1	4	4	2	4	2	0	2
2	0	5	2	2	3	5	2	1	0	0	2	2	2	2	0
3	2	0	3	6	1	2	1	3	1	0	0	5	3	3	0
1	3	2	2	4	0	1	1	0	2	0	1	2	2	1	1
5	1	2	0	4	5	4	1	0	1	2	0	6	1	1	3
4	1	0	0	3	3	3	5	1	0	1	2	7	1	2	2
0	0	1	1	5	0	1	2	2	2	2	1	1	4	2	3
5	2	0	0	1	3	2	1	6	0	0	0	4	0	0	1
5	2	1	1	0	0	0	1	0	0	2	1	2	4	2	0
3	2	0	2	1	2	0	3	2	0	3	2	0	3	0	2
3	2	6	1	8	0	3	3	0	0	3	0	3	3	1	0
3	2	1	1	3	1	0	1	2	0	0	0	1	0	0	3
5	0	0	3	4	3	0	1	0	1	0	1	5	1	5	2
1	2	1	1	2	3	2	1	0	1	3	0	3	2	4	0
4	0	0	1	6	0	3	1	2	0	1	1	1	2	1	2
6	3	0	0	4	6	3	3	0	0	2	1	4	5	1	0
1	4	1	0	4	4	0	3	0	0	0	2	2	2	2	4
4	5	3	3	2	0	5	1	0	1	1	0	1	0	0	1
2	2	3	2	4	3	2	2	1	0	1	3	4	0	4	1
3	2	0	1	7	0	0	2	5	3	1	0	1	2	2	0
6	5	0	0	7	5	2	0	2	0	0	0	0	1	0	1
0	2	3	0	5	3	0	2	4	2	0	1	2	3	2	2
4	2	3	1	7	5	5	1	1	2	0	0	4	3	1	1
1	2	0	0	5	6	3	0	1	1	0	0	4	2	0	0
3	1	2	2	5	0	1	0	6	2	1	0	4	0	0	2
3	3	0	0	5	2	3	0	1	0	1	0	1	2	0	3
4	3	1	1	4	2	0	2	3	0	2	1	2	3	3	7
5	1	3	1	3	3	1	1	0	2	0	0	3	1	2	1
3	2	0	5	1	6	3	1	0	1	1	0	2	3	0	0
1	0	1	2	4	1	3	0	0	1	0	0	1	6	1	0
3	6	3	0	3	4	6	0	1	0	1	0	5	1	1	0
3	2	2	0	0	2	0	0	2	2	1	0	1	1	2	2
6	1	3	0	6	0	3	0	1	3	0	2	2	1	2	2
4	1	2	0	3	2	3	2	4	1	0	0	3	2	0	0
3	3	0	0	1	2	3	0	1	3	1	1	1	1	1	4
3	2	1	4	3	4	6	0	1	5	3	2	1	0	1	2
2	0	2	0	0	1	0	0	3	1	0	0	5	0	2	0
5	5	0	1	4	1	3	3	4	1	0	3	6	2	3	0
6	2	3	0	5	2	2	2	1	0	1	0	0	2	0	1
3	7	0	0	1	3	1	3	2	1	0	2	1	0	1	3
3	1	2	3	3	5	0	0	5	0	1	2	7	3	0	0
4	1	2	0	5	1	2	0	1	2	1	0	0	1	2	2
3	3	2	1	6	0	1	0	3	0	1	3	1	0	1	1
3	1	0	6	4	0	1	0	3	3	4	5	3	2	1	1
4	4	2	0	0	2	2	1	2	1	2	4	0	2	0	1
5	2	1	2	0	2	2	0	0	2	0	1	4	2	1	0
0	3	0	5	3	4	1	0	3	0	0	1	3	1	1	0
4	1	0	1	3	1	0	0	0	2	2	1	2	0	0	0
3	2	1	5	3	1	0	1	2	4	2	1	1	1	2	0
3	1	2	2	3	1	1	0	2	1	0	0	4	0	1	1
3	1	0	0	8	0	0	2	2	0	0	1	0	1	0	1
4	0	4	1	1	2	3	2	2	2	1	4	1	5	1	2
0	1	1	1	2	1	2	1	1	0	0	1	3	0	1	3
1	3	2	0	5	2	3	2	0	1	0	0	5	3	1	0
11	0	0	2	6	0	0	0	2	1	0	0	2	2	1	2
4	2	0	2	3	1	1	2	2	1	1	0	5	2	1	2
3	1	3	1	0	1	3	2	2	1	1	2	0	0	2	2
4	4	3	0	3	4	2	1	4	4	0	1	5	2	2	2
2	1	1	0	5	0	5	0	3	0	4	1	1	2	0	2
4	1	0	0	5	2	1	1	0	1	1	0	3	0	2	0
1	2	1	5	8	1	1	1	6	0	0	1	1	3	3	2
1	3	1	0	1	1	1	0	1	2	1	1	1	1	0	2
3	3	0	2	3	4	1	1	2	0	3	1	3	2	4	1
1	7	2	1	2	1	2	1	0	1	0	0	1	5	0	1
0	0	2	1	2	0	2	0	2	4	1	2	7	0	0	0
6	0	7	0	3	3	1	1	1	1	1	0	6	2	0	0
4	0	0	2	4	2	0	1	5	1	0	1	10	1	1	0
1	2	0	0	3	0	3	2	0	4	0	0	0	0	0	0
2	0	0	0	5	1	1	1	1	2	3	0	5	4	2	1
0	3	0	0	1	2	1	3	0	0	0	0	2	0	2	4
0	5	2	2	4	3	1	0	2	0	0	0	0	2	1	5
2	1	0	1	5	0	3	3	0	2	4	0	2	1	2	2
2	1	0	1	6	3	3	2	0	0	2	1	1	2	0	0
3	1	0	2	3	0	2	1	2	2	1	2	1	3	3	0
2	1	1	1	2	2	3	4	2	1	1	1	1	4	1	0
0	6	1	0	6	0	1	4	0	0	4	2	2	0	2	4
3	1	1	2	4	0	1	0	3	2	2	0	0	1	0	1
0	2	2	2	1	1	5	1	1	2	3	0	3	0	2	0
5	5	2	0	1	1	1	2	4	1	1	2	3	1	3	3
2	2	1	3	3	1	0	2	0	0	2	2	4	1	3	1
2	0	2	2	4	2	1	0	0	1	1	1	1	3	1	2
2	3	2	1	3	5	2	0	0	4	2	4	4	3	6	1
5	2	0	1	3	0	2	2	3	1	1	1	4	3	2	0
0	1	2	2	5	3	3	1	3	0	4	0	2	0	1	0
4	3	1	4	6	5	3	4	4	1	1	2	6	2	6	0
6	2	0	0	4	2	1	2	1	2	2	0	1	0	3	1
3	1	2	0	1	2	0	4	1	0	1	2	5	8	1	2
4	1	3	1	1	2	1	1	2	2	0	1	0	2	2	0
2	3	2	0	9	3	1	6	2	2	2	1	0	2	1	1
1	2	0	1	2	1	2	0	1	1	0	1	3	0	2	1
1	3	0	0	1	3	1	3	3	1	1	0	6	0	3	2
1	0	3	0	5	2	3	0	3	4	0	0	6	0	1	2
2	2	0	1	6	1	1	1	3	3	0	0	3	1	0	2
2	0	2	1	3	3	2	2	4	0	0	0	3	1	1	2
3	2	0	0	4	3	3	2	3	1	0	0	3	4	3	0
5	0	0	2	2	2	1	1	0	1	0	1	1	4	1	3
0	0	1	1	9	2	4	0	5	1	2	0	6	1	4	3
1	6	1	3	4	1	0	1	1	1	0	0	3	0	1	2
0	0	1	3	1	4	2	3	0	0	1	0	1	1	1	0
1	6	2	1	0	4	0	2	1	3	0	3	7	1	0	0
5	2	2	2	12	1	3	2	0	0	2	1	1	1	3	5
3	4	2	6	7	1	0	0	1	1	2	0	4	0	3	1
2	1	2	0	1	0	0	0	3	0	1	0	4	2	0	2
0	4	2	1	5	3	1	4	1	0	1	0	1	3	2	1
3	1	3	2	4	2	0	0	0	0	0	0	2	1	1	1
4	0	0	0	0	1	1	1	0	1	0	2	2	1	0	0
3	1	2	3	2	2	2	1	2	0	3	3	6	0	6	1
0	1	1	0	5	1	1	0	0	1	1	1	9	1	0	0
4	0	0	0	4	3	0	0	1	0	0	0	2	2	1	2
0	1	0	2	4	3	1	0	2	1	0	0	1	4	2	2
5	1	2	1	6	0	0	0	3	4	3	2	3	2	3	2
3	0	1	0	3	1	2	4	2	2	0	4	3	1	0	0
4	5	1	0	5	8	1	0	1	1	2	1	4	0	2	0
6	0	0	1	5	2	0	2	1	0	0	0	0	1	0	0
5	0	1	2	4	2	2	2	2	2	3	0	3	4	4	3
1	3	1	1	3	1	1	0	1	4	2	1	3	0	4	1
5	3	3	1	2	3	2	3	3	1	1	2	7	0	0	1
0	3	0	4	5	7	0	3	0	2	1	1	3	3	3	2
0	1	0	1	6	0	0	1	2	0	4	1	5	0	2	0
2	4	1	1	3	0	0	0	2	0	2	1	0	1	0	0
4	0	1	2	3	6	0	0	5	2	0	0	1	1	1	1
7	2	5	0	6	2	2	1	1	1	4	1	1	3	4	3
11	4	3	0	6	2	2	0	0	0	1	1	4	4	0	0
0	0	5	2	4	4	1	0	1	1	5	0	4	0	0	2
2	3	0	0	4	3	0	1	0	0	1	0	6	1	3	1
5	1	1	0	7	3	0	0	5	0	0	1	5	2	0	1
0	4	2	0	8	0	0	1	2	0	0	0	6	6	2	4
2	1	1	1	0	9	2	2	0	0	2	1	1	2	4	3
3	3	1	1	4	5	0	0	0	0	2	0	5	1	0	0
1	4	2	4	4	1	1	1	3	1	1	2	0	1	2	0
0	0	4	8	2	2	2	0	3	0	3	0	1	0	1	2
3	2	4	0	3	5	1	2	1	0	1	4	3	2	0	2
0	7	3	0	7	8	2	7	0	0	3	0	5	4	1	2
4	0	1	1	2	2	1	2	0	0	0	0	1	4	0	0
5	1	0	0	2	1	0	3	1	0	0	0	8	1	2	3
6	4	3	4	4	5	0	1	0	2	0	2	3	2	2	2
0	0	3	1	5	5	0	0	1	0	4	0	4	0	5	0
0	1	0	4	6	2	3	3	3	0	1	2	3	2	0	0
2	1	3	1	5	2	0	0	1	0	3	0	3	2	2	1
0	0	4	2	1	5	2	2	0	2	0	0	6	0	4	6
0	1	4	0	3	3	1	0	2	0	2	0	0	0	0	0
0	1	2	0	3	6	2	2	6	0	0	1	0	0	4	2
1	7	0	4	5	1	2	4	3	3	2	1	4	1	4	1
4	0	1	0	4	0	3	1	3	2	0	0	9	6	1	0
2	1	0	2	7	4	0	2	5	3	1	0	3	4	0	1
2	0	2	0	5	0	1	3	3	4	1	0	3	2	4	1
6	3	2	1	2	2	0	1	0	1	0	0	3	2	0	4
5	0	0	1	2	2	0	0	4	4	4	0	4	3	0	1
0	4	0	1	6	1	4	0	1	0	3	0	4	3	0	2
1	2	2	1	3	0	0	0	3	1	1	1	4	4	1	0
1	0	2	2	4	3	2	1	0	0	0	1	0	2	0	3
0	2	1	2	7	4	1	3	0	0	2	1	5	0	1	0
4	0	1	0	6	1	5	1	7	1	0	0	3	1	0	1
2	3	2	4	4	2	1	0	0	2	2	3	5	0	0	2
1	3	4	4	2	4	0	2	3	2	3	2	4	1	0	1
2	4	1	0	4	5	1	3	2	1	0	2	3	2	3	0
2	0	2	9	3	2	2	1	0	0	0	1	6	1	0	0
0	1	0	1	5	0	2	0	1	2	0	3	0	1	1	0
3	1	0	0	3	0	0	0	4	4	0	0	4	3	1	2
4	1	2	1	0	1	0	1	0	0	0	0	1	0	0	2
2	1	0	0	5	1	3	1	0	2	1	0	2	2	0	2
2	1	1	0	4	5	0	0	0	3	1	0	1	1	1	4
6	0	1	2	2	1	3	2	2	2	1	0	6	4	0	2
2	1	2	3	3	1	2	0	1	3	0	1	2	0	1	1
3	1	3	3	6	3	3	0	2	1	2	1	6	0	3	3
4	0	3	4	2	4	0	0	3	0	0	2	1	1	2	1
1	3	1	1	3	2	2	0	6	0	2	1	4	2	1	1
0	1	0	1	2	1	0	1	2	0	3	2	5	2	1	1
3	0	0	3	2	2	2	1	0	0	2	2	4	1	0	1
5	2	0	1	2	1	1	4	4	1	2	5	3	0	2	2
3	3	3	2	1	3	2	0	2	0	2	0	2	3	1	1
3	4	1	1	2	1	5	1	2	2	1	0	4	2	1	2
0	5	0	1	2	2	1	1	0	2	0	0	5	4	0	0
0	1	0	2	2	0	0	1	4	2	2	1	0	1	2	0
0	6	0	0	0	2	0	0	1	2	3	0	3	2	2	0
2	0	0	1	5	1	0	1	1	5	0	1	3	0	2	0
1	4	0	3	2	4	0	0	0	2	0	3	1	2	0	1
2	3	0	0	0	0	3	2	5	0	3	0	3	0	0	1
0	5	0	1	3	1	3	0	2	3	2	3	6	1	0	0
0	2	1	1	2	1	1	4	0	1	1	4	4	3	3	0
1	4	0	1	2	2	0	2	3	3	1	0	4	3	2	0
1	2	1	1	5	4	0	2	1	2	4	3	1	2	0	0
7	0	1	0	5	0	0	0	0	2	1	0	3	0	0	1
0	3	6	4	4	7	2	0	0	1	3	2	1	4	1	0
0	1	5	1	8	2	2	2	3	0	2	2	2	2	1	0
0	0	0	0	1	1	1	2	1	3	3	1	1	6	1	3
3	3	0	0	2	2	2	1	1	1	0	1	5	0	0	0
0	2	2	3	7	0	1	2	1	4	0	0	5	4	0	0
4	0	1	4	3	2	0	0	0	2	1	1	2	1	0	0
0	4	2	0	0	1	2	1	1	0	1	0	0	1	1	0
1	1	1	1	2	5	0	1	3	3	3	1	2	2	2	2
5	4	1	1	8	1	0	1	4	0	0	2	1	1	2	0
5	2	2	0	2	0	0	0	2	0	1	0	1	1	2	0
5	3	0	3	7	1	2	0	4	1	0	3	3	2	1	0
1	1	0	2	4	1	4	0	0	0	2	1	5	1	0	1
1	0	1	1	5	2	1	1	4	2	4	3	1	4	0	0
0	3	6	2	5	2	0	2	1	2	0	1	1	3	0	0
3	1	4	0	4	2	0	0	2	0	2	1	2	1	1	0
4	2	2	4	5	0	0	0	0	0	0	0	0	6	0	0
4	2	0	1	4	0	3	2	0	2	3	2	1	0	1	1
8	1	2	0	0	0	0	1	1	1	0	2	2	1	1	1
3	1	0	4	4	0	1	0	3	3	0	0	1	0	2	1
2	3	1	0	4	2	1	1	2	0	4	1	1	2	0	1
7	4	4	0	6	1	5	2	6	1	0	1	4	0	1	5
3	2	0	2	3	0	2	1	2	4	1	0	2	3	3	0
1	3	2	0	0	1	1	7	2	5	0	2	0	5	2	2
6	2	7	0	3	5	1	1	3	1	1	0	3	0	1	1
5	0	2	4	7	0	0	2	0	0	2	1	3	3	0	2
8	2	3	1	4	1	0	1	3	3	2	0	5	3	0	1
2	0	1	1	2	2	0	2	1	2	3	3	6	2	3	2
2	0	1	0	7	1	3	1	0	3	2	2	4	3	0	2
2	2	1	0	5	1	1	2	1	3	1	0	5	3	1	0
0	6	3	0	2	0	2	0	1	2	0	1	2	0	2	1
3	5	0	3	2	0	0	0	0	0	4	1	6	1	2	0
2	1	1	0	8	4	4	0	0	0	1	0	1	2	0	1
1	3	2	0	1	0	6	3	0	2	5	0	4	2	1	1
4	0	0	1	2	1	0	1	1	2	2	0	5	3	4	0
2	1	2	1	3	7	1	0	3	1	0	0	4	2	1	0
4	3	0	5	5	2	6	0	3	3	1	0	0	0	0	2
0	4	1	1	4	3	1	0	0	1	4	2	1	1	1	0
2	3	4	0	3	2	3	0	5	3	0	0	3	2	1	0
0	1	4	0	2	4	1	0	0	1	4	2	4	0	0	0
1	3	0	4	7	1	3	2	4	2	2	0	5	0	5	0
0	0	1	2	2	1	0	0	7	0	0	0	0	1	1	0
5	5	2	1	7	4	2	2	0	0	1	1	7	1	1	0
0	6	1	6	5	4	2	0	1	0	0	0	8	0	0	1
3	7	0	0	5	2	3	1	1	3	1	2	4	0	0	1
1	4	4	1	5	2	1	1	6	1	6	2	4	6	0	1
2	2	0	4	5	4	3	2	0	2	0	1	3	1	1	0
1	2	4	1	5	2	0	1	1	4	0	1	5	0	0	2
1	4	2	0	5	0	1	1	0	1	2	3	5	1	2	0
3	3	0	2	2	3	0	1	2	0	2	4	1	1	1	1
1	2	0	2	3	0	1	0	2	0	3	0	4	2	0	1
6	0	2	1	5	3	2	0	6	2	0	0	3	3	2	0
2	6	0	5	5	2	2	0	2	0	1	0	3	1	1	0
2	3	2	0	1	1	1	0	0	0	2	4	0	0	0	1
3	1	1	0	1	2	3	0	2	1	0	1	7	3	1	3
1	1	0	0	4	3	0	1	6	0	0	0	5	0	2	2
3	1	0	0	2	4	2	0	3	5	3	0	4	1	1	4
3	3	5	0	7	1	0	0	0	0	0	1	2	1	2	0
3	2	0	2	3	4	0	1	4	1	1	0	2	0	4	0
3	0	0	2	3	2	3	0	2	0	2	1	2	3	0	0
0	1	0	3	5	0	0	0	4	0	0	0	2	2	1	1
2	0	1	0	3	3	0	1	1	1	1	0	5	4	1	0
1	4	1	0	3	2	0	2	3	0	2	1	3	0	1	0
4	2	2	0	1	3	2	0	5	0	1	1	3	3	1	1
4	0	2	0	5	2	1	0	0	1	0	0	1	0	3	5
0	1	1	3	1	6	0	1	2	1	0	0	4	1	1	1
4	0	1	2	3	2	0	0	1	2	3	1	2	1	1	1
4	0	0	1	1	1	2	1	2	0	0	0	3	0	5	1
3	3	0	5	6	1	0	0	2	0	0	1	6	3	2	4
0	2	1	1	0	0	7	1	0	0	1	0	4	2	0	0
2	0	2	0	5	5	0	3	6	2	1	0	1	2	1	0
2	2	0	0	7	5	0	2	5	2	4	6	2	1	1	2
0	1	0	1	4	0	2	3	0	1	1	0	5	2	2	2
1	3	1	1	1	4	4	0	4	1	1	0	0	1	2	2
1	0	1	1	0	6	1	0	3	2	1	1	0	1	0	1
3	0	1	1	2	1	8	2	5	0	1	0	0	4	3	3
5	3	0	0	2	2	2	2	1	0	2	2	1	4	0	1
0	0	1	0	4	5	1	0	0	0	1	0	8	0	0	0
4	2	2	2	0	0	2	1	2	0	0	0	5	1	1	1
5	1	0	2	5	2	2	2	0	3	1	5	2	6	0	1
1	0	1	0	0	3	1	0	0	0	2	0	1	0	2	0
2	3	1	0	3	6	1	1	4	1	3	0	1	2	1	1
6	5	3	1	5	0	1	4	4	1	1	1	4	0	1	0
2	3	4	0	1	2	1	0	2	2	3	4	3	1	1	1
0	0	1	1	3	2	0	3	2	3	2	2	2	2	1	0
2	1	2	0	4	1	2	4	1	2	0	4	5	0	3	0
4	2	1	2	5	1	2	0	4	0	2	1	1	1	2	0
3	1	2	0	3	4	2	2	3	2	0	2	1	4	1	4
2	1	3	1	3	3	1	1	1	4	1	1	2	1	0	1
4	3	0	1	6	3	4	1	1	0	1	1	2	2	0	1
6	4	0	2	5	4	0	0	1	0	7	3	5	1	0	1
3	3	3	0	3	3	3	0	3	3	3	2	5	2	4	1
3	1	1	4	5	2	3	1	1	2	0	0	4	0	1	0
3	1	4	0	3	2	4	2	0	1	1	0	2	1	1	0
4	3	4	0	2	1	2	0	2	2	0	1	2	4	0	0
3	2	1	1	2	3	2	1	0	2	0	0	3	4	1	0
4	4	3	1	7	0	4	0	0	2	0	0	2	2	0	1
2	1	1	5	7	1	1	0	1	0	0	0	1	3	0	2
4	1	4	1	1	3	4	1	0	0	1	1	1	1	3	0
1	3	1	4	6	3	0	0	0	0	0	0	1	1	2	2
5	3	3	3	3	2	0	3	3	0	0	3	1	3	0	1
2	1	0	1	3	1	2	0	1	0	0	0	2	0	1	2
2	0	2	3	2	5	1	0	3	3	2	0	2	1	1	3
4	3	2	0	2	2	1	1	0	1	0	2	1	2	0	3
12	2	2	1	6	2	0	1	1	1	2	0	0	2	2	0
4	4	3	2	6	2	1	3	2	0	0	2	4	0	0	0
2	1	1	1	0	2	0	0	1	0	0	0	2	3	1	3
0	3	0	3	0	5	1	2	0	2	1	0	2	1	1	1
5	0	3	0	4	1	3	2	2	3	1	0	1	0	0	0
0	1	1	1	4	0	0	1	1	0	0	1	3	1	0	0
3	3	0	0	6	0	0	0	5	4	0	1	2	3	2	0
1	1	0	0	3	4	2	0	2	0	0	0	1	0	0	0
4	1	1	2	3	1	2	1	0	1	0	0	2	0	4	0
1	1	1	0	2	3	3	0	7	3	0	0	1	1	2	0
2	0	4	2	5	0	2	0	4	2	1	2	6	0	2	5
3	4	2	1	0	4	4	0	1	1	1	2	3	3	0	2
4	0	0	4	4	0	5	1	2	1	0	1	1	1	3	1
3	0	2	2	5	0	2	4	0	4	0	1	5	5	1	2
6	4	4	1	1	2	2	1	2	2	1	6	4	3	0	0
3	1	3	2	7	3	1	0	14	0	0	3	1	0	1	0
10	3	0	1	3	0	0	3	2	0	0	1	4	2	0	0
7	1	0	0	4	1	1	2	1	1	3	0	1	3	2	1
1	0	2	2	0	1	4	0	0	0	2	0	0	5	2	3
4	1	0	0	6	0	1	3	0	0	3	2	7	0	0	4
5	0	1	1	8	0	1	0	3	3	1	2	0	6	1	2
2	0	1	0	8	3	2	0	1	2	0	2	1	4	0	0
0	1	2	3	0	1	2	1	4	1	0	1	7	3	1	0
3	2	0	3	1	4	6	3	2	0	1	0	3	3	2	1
2	4	0	0	2	1	2	0	2	0	1	2	1	5	0	2
3	3	0	2	5	5	1	0	0	4	2	0	4	2	1	0
0	1	1	2	5	0	0	0	3	1	0	0	3	4	4	0
1	3	1	1	3	5	1	0	2	1	0	0	2	0	3	2
0	1	2	1	2	0	1	1	1	4	1	0	1	4	2	3
2	3	0	0	1	0	2	5	6	3	3	0	3	1	4	2
4	1	1	0	3	3	4	2	3	0	2	1	2	0	0	0
2	2	0	0	4	0	0	3	4	2	0	1	3	0	3	0
1	1	0	1	2	0	0	2	3	0	2	0	6	1	0	0
3	0	2	2	5	2	4	0	2	1	0	0	1	0	0	1
4	0	1	4	2	2	0	3	3	0	1	0	5	1	1	0
0	2	2	2	2	1	0	3	2	0	3	0	2	2	4	0
3	1	0	1	0	3	5	0	0	2	1	0	1	0	2	2
1	3	3	2	3	3	1	3	6	0	4	0	3	2	0	1
3	3	0	0	1	1	0	1	0	2	3	1	1	0	0	0
0	2	0	3	2	3	1	3	0	0	3	0	0	0	0	2
1	2	3	2	2	3	0	4	4	0	3	1	3	0	0	0
2	5	3	1	4	3	2	4	1	2	1	2	0	3	0	1
1	2	2	0	10	0	0	2	3	0	0	0	2	7	4	0
1	1	2	0	2	2	3	3	1	0	0	3	4	1	1	2
1	0	0	1	4	1	0	0	5	0	0	1	1	2	0	3
0	2	0	1	2	3	2	0	2	3	1	0	5	4	4	0
3	3	0	0	7	0	1	1	0	0	1	0	2	4	3	2
1	4	1	1	5	3	1	5	4	0	2	1	1	0	0	2
4	2	3	1	6	3	2	1	2	0	1	1	2	0	1	0
10	0	4	1	5	2	1	6	2	2	1	5	3	4	4	2
4	0	1	1	1	2	4	2	0	0	0	1	5	1	1	0
3	4	1	3	0	0	3	0	0	1	0	0	3	4	2	0
0	1	1	3	5	4	1	0	4	3	0	2	6	1	1	1
4	2	0	1	2	3	0	1	2	0	3	2	6	1	2	1
5	3	0	1	8	6	0	2	1	0	0	1	2	0	1	3
1	0	0	6	3	0	2	0	4	1	0	1	1	4	0	0
3	1	1	2	4	2	3	1	5	1	3	3	5	0	1	1
3	2	1	0	1	0	0	0	2	0	3	1	1	2	1	1
5	1	1	0	5	3	1	2	0	2	0	1	3	2	0	0
0	1	2	1	4	2	1	2	2	0	0	1	2	0	2	0
0	2	1	2	3	3	3	3	3	0	7	1	0	3	2	0
5	2	1	2	2	0	0	4	4	3	0	0	1	1	2	1
4	0	0	2	4	6	0	0	1	2	0	1	7	3	1	0
2	3	2	5	3	0	1	2	0	1	4	2	4	0	1	0
4	1	2	9	1	0	2	1	1	4	1	1	0	0	1	0
3	1	2	1	2	1	3	2	2	1	1	1	1	1	0	0
1	3	0	4	3	0	3	3	4	3	1	1	4	3	0	1
1	2	0	4	4	0	1	1	1	2	0	0	4	5	1	0
1	0	0	1	8	0	0	1	4	1	0	2	6	1	4	0
5	0	3	2	8	1	0	1	2	2	1	0	1	1	0	0
2	2	0	1	0	1	2	2	4	0	3	5	5	3	0	0
2	2	2	3	4	5	3	0	0	2	1	0	0	4	3	0
7	0	1	1	2	1	0	2	0	0	0	2	4	0	0	2
3	2	3	0	1	1	2	2	3	0	2	0	3	3	3	0
2	1	1	5	4	3	3	1	0	0	0	1	3	1	0	2
7	4	1	2	3	4	2	2	1	2	1	1	4	0	2	0
3	2	1	1	3	2	0	4	0	2	0	0	7	0	0	1
0	1	0	0	3	1	1	0	1	1	3	0	4	0	3	1
3	2	0	3	0	0	1	1	1	3	3	1	6	0	3	0
4	0	1	0	7	2	3	0	0	1	2	0	1	2	0	1
1	1	2	0	3	4	0	0	1	2	1	0	4	0	2	3
5	1	0	1	5	3	4	1	0	0	3	2	2	4	3	2
4	5	2	2	13	0	2	1	1	1	1	0	9	1	2	1
3	6	4	4	2	2	0	2	1	0	1	0	5	0	0	5
5	2	3	2	10	5	0	0	1	0	2	1	1	0	1	2
3	1	3	3	1	2	1	1	2	1	1	4	6	0	0	1
0	3	2	6	0	0	1	1	3	0	2	1	5	2	0	1
2	2	3	2	0	3	0	7	0	0	4	1	0	1	1	1
0	0	1	2	3	1	1	1	1	2	0	1	4	2	2	0
5	2	1	0	3	3	1	0	3	0	0	0	1	1	0	1
0	2	1	3	1	4	0	4	0	2	3	0	2	1	0	0
4	0	2	0	5	2	0	3	0	0	3	3	3	1	0	4
2	4	2	1	4	2	3	1	0	0	4	0	2	1	1	0
3	0	1	0	8	0	0	1	2	1	0	0	4	3	1	0
0	0	2	1	8	2	1	0	0	4	1	0	6	0	0	1
0	2	4	2	3	0	0	4	0	4	1	0	8	0	0	0
8	1	1	4	6	1	0	1	1	4	0	0	2	0	0	1
3	2	1	0	4	5	0	0	0	0	2	3	4	4	0	3
4	2	1	3	3	5	0	0	6	3	0	1	5	4	3	0
0	0	0	3	3	3	2	3	4	1	1	1	4	2	2	0
5	0	1	0	4	3	1	1	3	1	2	0	3	1	2	0
4	3	0	2	5	1	0	2	0	0	1	1	4	4	0	1
1	1	0	3	3	1	1	0	4	2	1	0	5	4	0	0
5	4	0	0	2	1	1	0	0	2	1	0	3	2	0	5
5	2	1	0	6	0	1	1	1	0	1	1	1	1	1	1
5	1	7	3	5	0	0	0	1	2	2	1	2	3	2	3
4	6	4	2	2	0	0	1	4	1	0	3	5	2	0	1
2	1	1	1	3	1	2	0	1	1	1	1	6	1	0	0
0	1	0	1	8	0	0	1	3	1	0	2	7	1	1	1
5	0	1	3	2	2	1	0	2	2	0	2	2	1	1	3
3	2	1	4	6	3	1	0	1	1	1	1	7	1	0	0
0	0	1	1	1	1	0	0	1	1	0	2	3	1	2	3
4	1	0	0	4	0	2	4	4	0	6	1	0	0	1	2
2	0	3	0	4	1	3	0	0	2	3	1	4	4	3	0
5	4	1	4	4	5	1	2	1	2	0	0	3	4	0	1
2	2	1	0	0	2	2	0	4	1	1	3	3	0	2	0
1	3	1	2	5	1	1	3	3	0	4	0	2	2	0	2
6	1	0	1	1	1	1	2	4	0	2	2	2	1	0	3
0	1	0	1	6	0	2	3	2	2	2	0	5	3	3	1
5	2	2	0	4	0	1	2	2	0	1	1	2	3	2	1
2	1	3	4	3	0	3	2	0	0	0	1	3	3	0	3
3	3	1	2	7	0	4	2	2	4	0	3	3	0	1	1
2	1	4	1	6	4	5	0	1	0	1	1	1	1	1	1
0	1	1	3	10	4	0	2	6	0	0	1	1	1	3	1
2	1	3	1	8	3	0	1	5	1	4	0	1	1	0	2
1	3	4	0	0	1	0	2	1	1	2	0	5	3	1	3
4	0	0	2	4	1	2	0	4	1	3	1	7	0	0	0
3	3	1	1	2	3	2	0	1	0	1	2	2	2	1	2
4	0	0	0	0	2	0	0	0	0	2	0	0	3	3	1
2	4	3	2	4	2	2	0	5	2	2	3	4	1	1	2
0	4	5	0	3	2	3	0	4	3	0	0	1	0	2	0
0	8	1	1	8	2	2	0	0	2	1	0	7	2	1	0
3	0	1	0	1	2	2	5	1	1	3	0	5	2	0	3
5	0	2	0	6	3	2	0	3	3	2	0	3	2	1	2
4	1	4	1	4	4	1	4	2	1	4	1	3	2	1	0
5	4	0	1	8	4	0	0	1	4	0	1	0	0	2	2
1	2	1	0	1	1	1	4	1	2	3	1	3	3	0	1
1	2	2	0	3	1	0	0	7	3	3	0	5	2	2	1
8	2	2	2	2	1	1	1	3	0	1	1	4	5	3	2
3	2	4	3	1	0	1	0	0	1	0	1	8	1	2	4
8	4	1	0	9	4	4	1	4	1	0	1	3	0	0	0
3	1	0	1	1	5	0	0	0	0	2	0	0	2	0	1
1	3	1	0	1	4	2	0	2	1	2	2	1	0	2	0
3	1	4	2	2	3	4	2	6	4	4	0	5	3	0	0
1	1	2	0	1	3	1	5	3	1	2	0	5	2	0	0
6	4	2	0	2	3	2	3	2	1	1	1	1	0	5	0
4	7	1	0	1	0	0	2	1	3	0	3	1	1	2	0
7	0	2	0	6	2	2	0	1	1	2	0	5	1	1	0
0	0	0	0	3	0	3	0	7	0	3	4	1	0	1	6
1	0	1	3	2	4	1	0	2	0	1	3	0	4	0	1
0	4	2	1	1	2	2	2	1	0	0	2	3	2	0	1
3	2	0	1	6	4	0	2	0	1	1	4	3	1	1	3
1	2	4	1	2	2	3	1	1	2	0	6	0	0	0	1
2	1	0	0	4	1	0	5	4	1	2	0	1	4	5	1
4	1	0	1	3	2	0	1	4	4	0	0	2	0	1	2
1	2	1	0	5	0	2	0	0	0	0	0	2	2	2	0
3	3	1	2	2	1	1	3	4	0	6	0	1	2	1	0
0	0	1	0	2	0	0	0	1	0	2	1	1	0	1	0
1	0	3	1	7	0	2	3	4	4	5	0	2	0	0	1
4	0	2	0	4	0	1	3	3	2	1	0	1	2	0	0
2	2	3	0	2	5	1	2	3	3	4	0	0	2	0	1
2	0	2	3	7	3	0	0	3	0	3	0	3	0	0	0
2	2	0	0	6	3	1	1	1	2	1	0	3	4	1	3
3	1	0	1	6	3	0	0	2	0	2	0	2	1	2	1
0	0	2	1	3	1	3	0	5	3	0	1	6	0	0	0
0	1	0	0	2	2	0	1	1	2	1	0	1	0	0	0
0	0	0	1	2	0	0	0	1	0	0	1	6	0	1	2
0	3	2	0	3	1	0	0	2	1	0	2	0	0	1	1
1	1	1	1	4	4	0	0	1	0	0	1	1	0	2	0
0	1	3	0	6	0	0	0	1	0	1	1	4	1	0	1
2	0	2	2	1	2	0	3	2	1	0	0	1	0	2	1
0	4	0	2	7	1	0	1	3	1	0	0	1	0	0	1
4	1	1	0	8	2	0	2	4	0	0	0	1	1	0	0
0	3	2	2	10	1	1	2	2	2	0	0	1	1	2	4
4	4	1	2	8	3	4	1	3	0	0	0	2	1	1	2
4	1	2	3	3	0	1	1	1	0	1	0	1	2	1	1
5	2	1	4	0	2	0	1	2	0	1	1	3	1	2	0
1	1	4	3	0	0	0	1	0	0	5	0	1	1	0	1
1	1	1	0	4	1	0	0	3	1	4	0	3	1	0	0
1	6	0	0	2	3	3	0	6	0	0	0	1	2	0	4
0	2	0	1	7	3	3	2	5	1	1	0	5	1	3	2
1	1	3	0	7	1	0	1	5	1	1	0	0	0	3	0
4	1	0	0	2	5	0	1	6	0	1	0	1	1	2	3
2	2	1	1	9	2	0	1	2	1	3	2	0	1	1	1
4	4	0	1	2	8	1	0	0	3	0	0	3	3	3	1
3	1	0	1	2	0	3	2	2	0	4	2	5	4	0	4
3	2	0	1	6	2	1	1	1	2	0	1	1	1	0	2
3	1	2	1	6	6	2	0	4	0	0	1	0	2	1	3
1	1	1	1	3	4	0	2	4	1	1	3	4	0	3	3
2	0	2	2	5	1	2	1	5	4	1	0	2	0	1	1
3	0	1	2	7	0	0	1	2	3	0	0	2	1	0	0
0	4	2	1	7	1	3	0	5	1	0	0	0	5	0	1
2	3	1	1	1	0	2	0	5	1	2	1	8	4	5	1
0	0	0	1	3	2	1	2	1	5	0	0	7	2	0	0
0	0	5	3	6	2	1	1	3	0	1	0	1	5	4	1
7	4	4	2	2	0	0	7	2	0	0	0	0	1	3	2
4	0	0	0	2	5	1	0	1	0	4	1	12	3	1	4
0	4	0	2	3	4	1	0	1	1	0	2	4	0	3	0
5	2	3	1	8	0	0	1	2	3	3	1	1	0	1	0
3	0	3	0	5	2	1	2	2	2	1	0	2	3	0	2
3	1	1	2	5	1	1	2	0	0	2	0	5	2	1	0
0	2	0	0	4	1	3	0	2	0	3	5	3	1	0	1
2	3	0	1	2	2	1	4	3	0	3	1	3	0	1	5
4	2	1	1	2	5	0	1	1	2	1	0	1	0	1	0
2	6	2	2	6	4	0	4	0	0	1	1	4	2	1	0
5	1	0	2	7	3	1	2	3	0	0	1	1	1	1	1
0	2	3	0	1	4	6	1	4	0	2	1	0	2	5	0
6	1	2	4	4	4	2	2	2	2	2	1	3	2	1	0
6	1	1	4	2	2	8	1	0	1	1	1	4	0	1	3
3	1	1	1	7	1	5	0	1	0	0	2	0	3	1	0
5	1	7	2	2	2	1	0	3	4	2	1	0	2	3	1
1	1	1	2	4	1	1	0	0	0	0	0	4	1	0	1
1	2	0	1	6	4	2	3	0	0	0	0	1	2	0	0
1	2	1	2	3	0	0	1	1	3	2	0	1	4	2	2
5	2	1	0	4	3	2	3	0	2	1	2	1	2	0	4
3	4	2	0	1	0	1	0	1	1	3	0	2	2	0	1
4	1	2	1	4	4	0	3	0	0	1	0	1	3	2	0
2	3	1	0	10	3	4	1	5	1	0	0	4	1	1	1
1	2	0	0	3	2	1	1	1	1	3	0	4	4	2	1
0	8	3	1	8	1	1	1	4	3	0	4	3	2	1	3
2	6	2	0	6	3	0	0	3	2	1	3	7	5	2	0
5	2	0	1	6	2	4	2	6	0	1	0	0	3	0	0
1	3	3	1	3	3	2	1	0	3	5	0	1	1	2	0
2	4	0	0	2	4	1	2	0	1	1	1	0	2	1	2
6	5	0	2	1	2	1	1	2	0	1	2	2	16	1	1
3	0	2	0	3	2	2	1	0	1	1	0	5	0	1	0
4	1	1	1	3	2	3	0	2	0	0	0	0	2	0	3
6	2	1	4	1	2	1	2	4	2	4	1	4	0	0	1
0	0	3	1	1	2	2	0	1	0	4	2	4	2	2	0
0	1	0	2	4	0	2	0	1	0	0	0	4	5	2	6
8	0	4	0	8	4	0	1	0	2	1	0	0	4	1	2
2	5	1	1	2	1	2	2	2	3	1	1	1	2	0	0
3	3	1	1	3	1	2	0	1	0	0	1	1	4	1	1
5	1	3	4	1	1	0	1	2	1	1	2	1	1	0	2
2	2	1	1	2	1	0	1	1	3	1	1	5	0	2	0
2	4	3	0	3	0	5	0	0	2	1	0	2	1	3	1
0	0	0	0	3	2	3	1	1	0	0	0	4	2	0	2
5	0	0	1	6	6	0	0	2	0	3	0	10	0	2	1
0	3	2	0	7	1	2	1	4	1	0	0	1	1	0	3
0	0	1	2	5	1	0	2	2	4	0	0	5	2	4	1
5	1	1	3	5	3	1	3	5	2	2	0	3	2	0	1
5	0	2	3	4	1	1	0	1	2	0	0	2	2	2	2
2	2	0	0	3	1	4	1	4	4	2	0	5	1	1	1
0	5	1	0	3	1	1	0	0	0	1	0	1	1	2	5
6	3	0	1	3	0	0	3	3	0	0	3	4	2	0	2
1	0	2	4	3	3	0	1	3	0	1	1	0	0	1	0
0	1	0	1	7	2	2	1	0	2	1	1	5	3	1	1
3	0	1	2	3	5	3	0	1	3	0	0	5	4	1	0
3	4	0	1	1	1	2	0	5	0	2	0	4	0	2	0
1	0	3	1	5	0	4	0	5	3	1	0	4	2	2	2
6	3	2	2	0	2	4	1	2	1	0	1	2	0	3	0
0	1	2	1	6	3	3	1	2	0	2	2	3	1	0	0
4	5	1	0	2	0	3	3	1	3	0	0	5	4	1	2
6	3	4	0	4	2	2	0	0	1	1	0	7	3	2	1
3	0	2	2	1	2	1	0	0	1	0	1	2	1	4	0
5	5	2	0	14	5	0	2	4	1	3	0	3	3	2	1
0	5	3	1	4	1	2	2	6	2	2	1	0	2	0	0
0	1	2	1	1	2	1	1	0	0	1	0	4	0	0	0
2	3	0	0	4	0	0	0	5	0	1	0	4	0	1	0
0	0	2	1	8	2	1	0	1	5	1	1	1	0	2	1
2	2	1	0	6	2	2	3	3	0	2	3	1	4	1	2
1	0	1	2	5	1	1	2	4	1	0	0	3	4	3	0
4	0	1	0	5	3	2	2	3	0	1	0	2	0	1	2
1	1	2	3	4	1	1	0	1	3	1	1	3	0	0	0
1	2	0	0	2	2	3	2	1	0	1	0	3	3	3	0
3	4	1	5	6	4	5	4	0	2	3	0	0	5	2	0
1	0	0	1	2	8	0	2	5	5	2	0	5	0	0	1
3	2	1	2	1	3	3	0	5	1	1	1	6	2	0	0
2	2	0	1	2	2	0	0	3	3	1	1	10	5	0	0
2	3	1	0	3	4	0	1	1	0	0	3	5	0	3	1
1	0	1	2	3	1	1	2	1	1	2	3	4	3	0	2
3	0	4	2	1	1	2	1	0	3	3	2	2	12	0	1
1	1	0	4	2	3	2	2	0	3	0	1	4	0	0	0
2	0	1	0	5	5	0	0	0	1	0	0	1	0	3	0
6	4	1	1	3	0	2	4	2	0	1	0	5	2	2	1
3	1	0	1	6	2	1	1	3	2	2	0	5	0	1	1
2	3	0	0	3	5	2	0	0	0		2	1	5	0	1
1	3	1	6	8	4	0	1	4	0		1	1	4	0	1
4	3	0	0	4	4	0	1	1	0		0	4	1	1	0
2	2	1	3	7	2	1	2	1	4		0	1	0	3	1
0	0	1	1	1	3	1	4	2	5		0	3	1	0	2
2	4	5	1	5	3	0	0	5	1		1	3	5	1	0
3	5	5	0	3	2	1	1	0	2		0	0	2	0	0
3	5	1	0	5	4	5	1	2	0		2	1	0	1	6
2	1	0	9	5	1	3	1	3	4		1	2	1	0	3
0	1	3	4	4	0	4	0	0	0		1	7	1	1	0
1	1	2	2	6	2	0	0	1	0		0	4	1	0	0
3	1	2	3	1	0	2	2	2	0		4	2	5	2	0
2	1	0	0	6	0	0	5	1	2		1	1	2	0	0
5	1	5	2	2	4	1	2	1	0		4	2	1	2	0
0	1	3	0	7	4	2	0	1	0		4	3	1	1	1
1	0	2	0	1	1	0	1	0	0		1	1	5	0	0
2	0	2	3	1	2	0	3	3	0		0	4	1	0	0
2	3	0	3	4	2	4	1	5	0		0	5	2	2	1
1	1	1	4	4	0	1		1	2		2	2	4	0	0
2	0	0	0	5	3	2		1	1		0	4	0	4	0
3	2	0	1	3	4	0		5	1		2	0	2	0	0
1	0	2	1	2	2	0		1	0		0	1	2	0	0
7	1	2	1	1	3	1		1	1		1	3	5	0	1
0	0	0	0	1	2	1		1	0		2	9	2	1	0
4	2	0	1	5	1	3		4	1		2	3	2	0	2
0	2	1	0	6	1	2		2	2		5	0	1	3	0
0	2	0	4	1	3	1		1	0		1	5	1	1	1
0	1	7	0	4	3	0		1	0		0	0	3	1	0
6	0	1	2	2	4	1		0	2		4	1	0	0	0
3	2	3	1	1	1	1		5	3		0	1	0	2	3
3	1	3	3	2	2	2		2	1		0	7	0	3	0
2	2	2	3	5	0	1		1	0		0	0	0	3	3
0	4	3	0	4	3	3		0	0		1	3	1	3	2
2	5	0	2	3	1	2		4	1		1	5	2	0	0
2	0	2	1	1	0	0		0	4		2	4	4	0	0
1	0	1	1	4	1	2		1	3		0	3	4	0	0
0	1	2	2	4	2	3		2	1		0	7	1	4	2
0	3	1	1	6	1	1		0	0		2	2	0	6	1
2	0	1	1	5	3	1		0	0		2	4	2	0	1
1	0	0	2	6		1		0	1		0	4	0	3	1
0	2	2	1	3		1		0	4		1	0	2	2	2
2	2	3	0	6		2		2	0		1	0	0	2	2
4	0	1	0	5		2		2	0		1	1	1	0	1
2	1	0	1	7		0		4	0		2	4	0	0	1
1	1	2	2	3		1		0	1		1	6	0	0	0
2	1	0	2	1		0		0	1		0	7	1	0	1
0	0	1	0	4		0		0	2		0	0	0	1	0
1	2	1	1	4		0		1	0		0	3	1	2	0
3	3	0	0	1		2		0	5		1	2	2	2	0
1	2	3	1	4		2		0	1		1	0	4	0	0
3	1	0	2	4		2		0	1		2	3	0	4	1
2	1	2	5	5		3		4	0		0	4	2	0	1
1	3	0	1	2		1		1	0		2	3	1	4	1
2	4	1	1	0		3		5	0		0	1	3	3	1
4	2	0	0	3		5		3	0		5	8	1	2	0
2	2	4	4	7		0		1	0		0	6	2	2	0
0	0	3	0	6		3		0	2		1	4	2	1	0
3	1	1	2	0		1		0	0		0	2	3	1	0
0	1	5	0	2		1		0	0		1	1	0	1	2
7	3	2	0	2		0		0	0		3	3	0	1	3
3	3	2	1	3		1		7	0		0	3	0	3	2
4	4	0	2	3		3		0	0		1	5	0	4	8
1	2	0	0	6		0		6	0		0	7	2	0	2
7	0	2	0	1		0		0	2		3	1	2	2	0
1	1	7	1	1		0		1	3		0	3	0	2	0
5	5	5	2	2		2		1	1		0	1	2	1	3
4	2	4	0	3		0		1	1		0	4	2	3	1
0	0	2	0	3		1		0	0		1	4	0	1	1
3	1	0	2	1		0		0	2		0	7	5	0	2
1	1	5	2	11		2		3	1		2	3	4	0	0
5	0	0	1	8		2		4	1		0	0	1	0	0
0	2	0	2	2		0		2	0		1	5	0	2	3
1	1	2	5	2		1		6	0		1	0	5	3	2
3	2	2	1	2		1		3	1		4	4	1	4	0
0	1	1	0	6		4		0	0		0	4	1	0	1
3	5	6	2	0		5		1	0		1	0	1	0	2
2	2	0	0	2		3		0	0		1	6	3	6	1
3	0	0	1	7		1		2	0		0	4	0	0	1
0	2	1	2	3		1		0	1		0	3	1	1	2
0	0	1	2	1		2		2	0		1	0	0	1	1
4	2	0	0	5		2		0	5		1	1	1	3	0
0	2	0	0	5		1		2	3		2	3	0	0	0
0	0	4	0	5		0		2	5		3	2	0	0	1
0	1	2	1	1		9		4	1		0	1	3	2	0
1	5	1	0	2		1		3	0		0	1	2	0	1
1	4	0	1	2		1		4	0		0	1	2	0	1
3	0	0	0	0		0		0	2		0	4	4	0	0
1	1	1	0	0		2		0	1		2	7	3	1	3
1	0	1	0	1		2		4	0		0	3	2	0	0
4	5	2	2	0		0		2	2		0	3	0	3	0
1	0	6	0	1		1		0	0		0	3	1	1	1
3	7	0	1	2		0		4	0		0	4	4	3	1
3	5	1	1	4		0		1	2		0	1	0	0	2
3	1	5	1	5		2		2	2		1	0	5	0	1
1	0	1	1	8		0		1	0		0	1	5	0	0
2	4	6	1	4		3		2	0		0	5	3	0	2
6	2	1	2	7		2		1	3		0	1	1	1	1
3	1	2	2	4		1		0	1		3	4	2	1	1
2	1	0	0	1		0		3	0		2	4	6	0	3
1	0	4	2	2		1		2	5		0	0	4	0	2
0	0	3	0	0		3		3	0		1	2	1	1	2
0	0	4	0	3		6		4	2		3	5	5	0	0
4	0	1	3	0		2		4	1		1	4	1	1	1
5	0	2	2	2		2		6	0		1	4	1	1	1
1	0	1	0	5		1		0	5		1	3	3	1	0
3	2	5	0	3		3		0	3		4	6	1	3	1
0	0	1	0	5		2		3	0		1	2	1	0	0
4	4	3	0	0		1		3	0		0	0	1	0	3
6	1	1	0	3		0		4	0		0	2		0	2
5	0	0	5	3		1		1	3		0	7		2	0
3	1	1	0	4		3		1	0		4	1		2	3
1	2	2	4	4		2		3	3		1	1		3	1
3	1	1	0	5		2		4	0		1	7		0	1
9	2	1	0	0		2		1	3		2	0		3	2
3	0	2	1	5		4		0	0		0	4		3	2
5	1	3	2	1		4		3	2		0	3		1	0
1	4	3	1	6		1		0	1		0	2		1	0
0	3	0	0	5		3		0	1		0	0		0	0
1	2	2	0	2		0		2	0		4	2		0	1
5	0	1	0	4		2		5	1		2	5		1	1
0	1	3	0	8		7		0	2		1	2		0	2
3	1	1	0	2				0	3		0	4		0	0
4	0	0	2	6				0	0		2	3		3	0
0	0	1	1	0				2	1		1	4		3	1
4	2	1	1	5				2	1		4	6		7	2
0	2	0	1	4				5	6		0	3		1	0
2	3	0	1	7				5	3		0	0		0	1
2	4	2	0	1				0	2		1	3		2	0
3	0	2	1	9				0	0		3	6		0	0
0	2	3	1	4				1	2		3	3		2	0
5	0	3	0	2				3	1		1	0		0	5
1	1	0	1	3				2	0		3	1		0	1
1	1	1	0	8				4	1		0	3		2	1
3	4	2	0	2				5	0		1	2		3	1
1	1	2	2	3				2	0		1	4		0	2
1	2	1	2	6				0	2		1	2		2	2
2	0	1	1	6				4	2		1	7		1	2
5	4	0	0	6				2	0		0	4		1	3
2	3	0	0	5				3	1		0	2		0	2
0	2	2	1	2				3	2		2	4		2	0
0	5	6	1	3				2	0		1	3		3	0
6	3	1	0	6				1	0		0	5		1	1
2	4	0	0	0				2	0		3	2		2	1
5	2	0	2	1				5	0		0	7		0	2
4	1	0	0	4				0	3		0	6		0	1
1	5	2	0	5				3	1		3	5		1	2
0	2	2	3	4				1	0		0	7		1	1
1	3	1	4	0				2	3		0	0		2	1
4	6	3	0	4				0	0		2	5		3	0
2	2	0	3	3				4	0		0	5		1	0
1	2	0	2	6				0	0		2	4		1	2
3	3	0	0	1				1	2		2	2		1	0
0	4	0	0	2				2	2		2	6		0	3
5	1	2	3	4				0	0		1	1		0	2
1	1	1	0	2				2	0		0	5		0	1
5	2	0	1	1				0	0		0	5		2	2
0	0	1	0	10				0	1		0	6		0	1
2	1	1	0	1				2	3		0	0		1	0
0	3	1	4	9				0	1		2	4		1	0
0	0	3	0	3				0	0		1	3		1	0
0	1	1	1	7				2	2		0	14		1	0
5	3	1	2	2				3	0		0	3		1	0
3	3	0	4					2	1		0	5		0	0
1	3	0	1					0	0		0	0		0	0
2	0	2	1					5	2		1	2		0	0
2	3	1	0					1	0		0	2		0	0
7	2	1	1					0	0		0	2		0	1
4	0	1	5					1	0		2	0		0	2
4	0	0	1					3	0		0	0		1	0
2	0	0	3					1	0		1	3		1	1
5	0	1	0					0	0		0	4		2	4
5	1	4	2					1	0		1	2		2
0	0	4	1					1	1		1	2		1
0	3	1	1					4	0		1	6		1
2	1	1	1					3	0		1	4		0
4	3	2	1					0	0		0	4		1
0	0	1	2					1	0		0	3		0
8	4	3	0					1	0		1	0		0
1	0	1	2					0	0		1	2		0
2	3	3	1					2	3		0	3		2
1	0	1	2					1	0		0	2		0
0	2	2	2					2	2		1	6		0
2	3	1	0					3	0		0	1		2
1	3	2	4					2	0		0	1		3
0	2	1	2					1	0		0	3		0
3	3	0	1					0	1		1	2		0
5	2	0	0					0	0		1	1		1
2	0	4	3					0	0		0	0		1
2	2	1	1					1	3		3	1		5
0	0	0	3					0	0		0	2		0
0	1	0	2					0	2		2	0		1
1	2	0	0					0	6		2	1		1
0	1	1	2					1	3		1	1		3
2	0	3	0					2	3		0	2		2
5	1	0	2					0	0		0	1		3
4	1	2	3					2	1		0	3		2
2	0	2	0					2	0		1	3		2
2	3	2	1					1	4		0	2		1
0	0	1	3					4	0		0			1
4	4	0	1					1	0		2			0
3	0	3	4					2	0		3			3
1	0	3	0					4	3		0			3
0	0	0	1					3	0		0			2
4	1	0	3					1	0		4			0
0	2	2	2					2	2		0			2
1	1	0	3					0	0		0			2
3	1	1	1					0	0		0
1	2	0	2					1	1		0
3	5	3						3	1		0
4	0	3						2	2		1
7	1	3						1	2		0
0	7	0						0	0		0
1	2	0						2	3		0
1	3	2						4	0		2
5	3	1						2	0		2
1	1	3						2	0		0
3	6	1						0	0		0
4	0	0						2	1		0
2	4	0						8	1		0
2	0	2						1	0		1
1	6	0						0	0		0
2	2	0						2	3		0
2	2	2						4	3		0
0	3	0						4	0		2
8	2	2						3	0		1
0	0	0						0	1		0
0	1	0						3	0		0
2	2	1						1	1
1	0	1						0	2
6	4	0						2	0
1	3	1						3	0
4	2	0						0	2
2	0	0						2	1
0	1	1						0	1
2	2	1						0	0
4	2	1						4	2
5	2	1						5	2
4	0	4						0	3
4	1	5						6	3
3	0	5						0	1
3	3	1						2	2
6	4	0						0	1
2	2	2						3	0
2	1	0						2	3
1	1	2						1	1
6	3	1						0	0
1	2	1						4	0
0	0	0						2	4
3	1	1						1	2
0	0	0						2	0
2	0	1						0	1
0	0	1						4	0
0	2	0						1	0
7	0	3						4	0
4	0	0						6	1
0	10	2						1	0
4	1							1	0
3	0							3	1
5	5							0	2
0	0							2	0
6	2							0	1
2	0							1	0
3	5							2	1
5	2							6	1
1	0							3	3
2	1							0	0
5	0							3	0
3	1							2	1
5	2							1	1
0	0							3	2
3	3							3	1
3	1							5	2
4	4							0	0
5	1							0	2
6	0							3	0
1	3							0	1
3	0							6	0
3	3							1	1
1	4							0	0
0	0							2	0
1	3							2	1
4	1							2	2
6	8							1	0
2	0							0	0
3	0							0	0
3	3							0	1
0	0							5	2
3	1							4	0
0	0							0	0
3	0							2	0
3	4							0	1
2	0							6	0
3	2							3	1
0	1							4	0
1	1							3	0
1	0							3	0
3	2							3	0
1	0							0	1
0	1							0	1
2	0							0	2
0	0							6	0
5	0							5	0
2	0							2	1
4	0							0	1
4	1							3	1
4	1							7	2
1	4							1	0
5	0							1	1
7	1							1	0
2	5							4	3
2	1								0
3	1								0
2	4								1
3	5								0
6	1								0
1	2								1
0	0								0
0	1								2
1	1								0
2	4								2
1	0								0
6	3								1
1	0								2
1	3								4
3	0								0
4	1								5
1	2								1
4	2								2
0	1								0
5	0								1
3	3								1
3	0								1
0	1								1
0	2								4
4	1								0
0	2								0
1	1								2
2	6								0
0	4								2
0	1								0
0	5								0
1	1								0
3	6								0
3	2								0
3	2								0
2	0								1
2	3								1
1	0								1
8	0								2
5	1								3
5	1								3
5									0
4									0
6									0
4									0
4									0
2									1
0									2
1									1
3									1
0									0
3									2
4									0
0									0
1									3
6									5
1									3
4									0
6									0
0									1
5									0
1									2
6									0
4									5
3
3
0
7
1
0
1
3
1
7
4
3
2
3
3
3
2
3
3
0
5
2
0
5
1
1
2
3
3
1
0
0
4
6
2
3
1
2
1
0
3
2
0
1
0
5
5
3
4
0
4
3
0
0
3
3
0
2
2
0
0
1
3
1
2
1
1
3
0
2
3
0
0
3
3
3
1
4
1
3
7	0	0	0	3	3	2	0	1	0	2	2	4	1	1	1
1	2	2	0	3	5	0	0	2	0	1	1	5	0	2	0
2	0	2	1	3	2	2	0	4	2	0	0	2	0	3	2
0	0	0	1	2	3	2	4	2	0	1	2	0	0	1	0
4	6	1	4	3	0	0	0	1	1	0	0	2	1	5	2
5	0	3	3	6	4	0	0	0	0	0	0	3	0	3	0
1	0	1	0	6	4	2	0	0	0	3	1	3	1	0	0
6	5	0	2	2	2	3	1	1	4	0	2	1	0	0	0
0	1	0	1	4	2	1	5	1	0	0	0	2	2	0	3
1	1	0	1	8	5	5	2	1	0	2	1	4	1	5	2
9	2	0	0	3	2	2	1	3	0	1	0	9	1	1	2
1	0	1	0	7	1	5	1	3	1	0	0	1	0	2	1
5	0	4	2	3	4	1	2	1	2	3	0	1	0	2	0
2	0	1	2	5	1	0	1	0	1	0	0	3	2	2	4
3	2	0	0	3	2	7	1	0	0	3	2	6	0	3	1
4	0	0	2	6	1	3	4	4	0	1	0	5	3	2	0
3	2	0	2	5	1	0	0	1	2	1	0	6	0	0	1
1	0	0	1	6	0	4	3	2	0	0	0	0	0	0	3
4	1	2	2	3	1	1	3	1	2	4	0	1	0	2	2
4	2	1	1	4	1	0	5	0	0	2	2	2	0	2	1
1	1	0	0	5	3	2	2	2	2	0	1	2	0	3	1
0	3	3	0	7	2	2	2	1	1	0	0	6	1	2	2
1	1	0	0	0	3	2	0	2	0	1	1	1	1	2	0
0	1	1	1	6	5	0	0	2	1	1	0	1	1	3	4
2	4	1	3	5	2	3	0	0	0	1	0	4	1	0	1
7	1	2	0	3	7	4	0	1	0	0	0	3	0	5	0
2	1	1	4	4	4	3	1	2	0	0	0	0	0	0	3
1	1	0	3	6	2	2	1	2	2	0	1	1	2	1	3
0	2	0	2	5	4	8	1	6	2	0	0	4	3	1	0
2	2	0	1	8	1	3	0	0	1	4	0	4	0	2	2
1	2	2	2	7	4	1	0	0	0	0	0	3	0	1	0
5	0	0	1	6	3	4	1	10	0	2	0	2	2	2	2
2	1	1	3	6	2	1	0	1	3	1	0	0	0	1	3
0	0	0	0	6	7	5	0	2	0	1	0	8	2	2	3
2	2	3	1	7	5	1	1	1	0	1	0	4	3	6	1
4	3	1	1	4	4	1	0	0	0	2	1	4	2	0	1
3	0	0	0	2	3	1	1	1	0	0	0	4	1	1	0
2	0	1	5	3	10	7	2	5	3	0	0	1	2	2	0
1	3	1	0	2	5	0	0	1	0	1	0	4	1	1	1
0	0	0	2	3	1	0	1	1	0	0	0	4	3	0	0
3	1	0	3	6	4	4	0	4	2	2	1	6	0	1	1
1	0	2	1	5	1	4	2	2	1	0	0	5	1	1	1
0	1	2	0	2	1	1	3	2	4	0	0	8	1	0	1
8	2	0	0	8	5	0	1	1	0	0	0	8	0	0	1
0	0	1	2	7	1	5	2	1	2	0	0	6	1	1	1
3	2	0	1	0	3	0	1	1	1	1	0	7	0	0	2
3	2	1	1	5	5	3	1	0	0	0	0	5	0	0	3
1	1	2	1	2	0	2	1	1	2	1	0	8	0	0	1
2	0	1	4	2	4	1	0	2	0	2	0	5	1	2	4
6	2	2	1	5	1	0	2	0	0	0	0	4	0	4	1
1	0	1	0	5	3	2	3	0	2	2	0	7	0	4	2
5	2	2	1	5	0	1	2	0	0	3	0	9	3	2	0
2	1	0	1	3	3	1	1	3	0	0	2	5	0	4	0
3	0	2	1	5	3	2	2	0	0	2	2	4	3	4	2
5	2	1	0	6	2	0	0	1	1	3	0	1	0	2	0
0	0	2	0	9	5	1	0	0	4	2	1	1	0	3	1
1	4	1	2	5	0	3	0	0	2	0	2	3	3	0	2
0	3	0	0	8	4	2	3	2	0	2	0	7	1	1	0
0	0	0	0	5	0	4	0	0	2	1	1	6	1	3	0
1	1	0	0	3	5	1	0	1	2	0	2	5	1	0	3
3	2	0	1	5	4	2	0	1	0	1	1	8	1	0	0
3	3	0	1	3	3	3	1	2	0	0	1	5	2	3	2
5	3	0	1	10	1	2	1	2	0	4	1	5	1	2	1
5	1	5	0	5	3	2	1	0	2	2	0	2	0	3	4
6	1	1	0	6	0	0	1	0	0	0	0	6	0	2	3
4	4	0	0	7	3	4	0	2	1	3	0	1	1	4	4
6	0	0	3	0	2	2	1	1	1	2	0	4	2	3	2
0	0	2	6	5	0	0	3	0	0	1	0	4	1	1	0
0	2	0	2	3	3	0	2	0	0	3	1	1	2	3	0
1	0	1	4	3	2	3	2	3	1	0	1	3	1	1	0
0	4	2	0	8	4	5	1	1	0	1	0	0	3	2	0
4	2	0	0	4	3	0	1	0	0	2	0	3	0	1	0
6	2	1	2	9	4	2	0	0	1	0	0	4	0	2	3
6	1	3	3	6	3	1	1	0	2	5	1	6	2	1	1
2	0	2	5	5	3	0	0	1	2	0	2	2	0	4	0
4	1	0	0	5	1	2	0	0	1	2	0	7	0	2	2
3	2	1	5	7	1	1	1	0	1	1	0	6	0	3	1
2	1	2	1	1	3	1	1	0	0	3	0	1	0	2	3
9	2	1	1	5	0	5	0	2	0	1	0	2	2	0	1
3	0	2	1	6	1	1	3	1	2	0	0	1	0	2	0
4	2	0	2	0	4	0	1	0	1	3	0	6	1	3	0
3	1	1	2	2	7	0	0	0	3	0	0	1	0	1	1
8	2	3	4	4	4	3	1	1	0	2	0	5	0	3	2
3	1	0	0	6	5	5	1	0	4	0	1	2	0	0	0
1	0	1	3	7	2	1	1	1	3	1	0	3	2	1	1
4	1	0	2	2	2	0	0	3	0	3	0	6	1	0	1
0	1	0	0	6	7	2	0	2	1	3	0	7	1	3	0
5	4	0	3	5	2	1	3	1	0	0	0	10	1	0	2
3	1	0	2	5	4	2	0	0	0	2	0	9	0	2	2
6	0	0	1	4	2	0	0	0	0	3	0	6	0	1	2
1	2	0	0	5	0	1	1	1	0	1	0	0	0	2	1
2	0	2	2	4	2	0	0	4	1	2	1	3	0	1	0
5	0	2	3	5	4	2	1	3	0	3	0	4	0	0	1
3	2	0	0	3	1	2	1	0	0	0	1	4	0	1	0
4	2	0	0	2	2	2	3	2	0	4	0	7	1	5	0
1	2	1	0	9	5	0	1	0	0	1	0	5	1	0	1
10	1	3	0	1	0	1	1	2	2	0	0	2	0	0	1
1	0	1	1	5	3	0	0	1	0	0	1	4	3	4	0
2	6	3	0	6	1	2	2	1	0	4	1	3	2	1	1
2	0	1	0	7	4	0	3	4	0	0	0	4	0	0	0
4	0	1	1	3	3	2	1	1	1	1	0	6	1	2	0
0	1	0	0	7	5	2	0	0	1	3	0	2	0	1	5
0	1	0	3	6	1	4	1	1	1	0	3	8	4	1	0
0	1	0	1	7	1	2	2	3	3	0	1	6	0	0	3
0	2	0	1	6	2	1	2	1	1	1	0	2	0	0	1
2	3	4	1	10	5	1	0	0	2	2	0	5	0	2	0
5	1	1	0	6	11	2	6	0	0	3	1	1	0	0	0
2	1	4	1	4	2	1	4	2	1	0	0	7	2	1	1
5	0	2	0	8	4	4	0	1	1	0	0	3	1	3	2
2	0	1	1	10	4	0	0	0	1	0	0	2	0	0	1
7	1	0	1	7	3	0	1	8	1	1	0	1	2	2	1
2	2	0	6	2	0	1	3	0	0	0	0	5	0	1	1
6	0	2	0	6	2	1	2	3	1	1	3	3	1	1	4
2	0	1	1	5	5	4	1	0	1	1	0	7	1	1	1
1	0	1	2	4	0	1	0	0	3	0	3	1	3	3	0
6	3	0	0	4	2	0	4	2	0	0	1	7	0	0	0
5	0	1	3	5	3	0	0	0	0	1	0	1	0	0	0
2	2	2	2	1	1	1	2	2	0	3	1	8	2	1	1
0	0	0	1	5	2	2	0	3	2	0	0	2	0	3	0
5	1	0	0	6	3	1	1	0	0	1	0	5	1	2	3
4	0	0	1	4	1	4	3	0	1	2	0	3	0	3	2
2	0	0	1	8	1	0	0	0	0	1	1	6	0	3	5
1	0	3	0	5	1	1	2	3	0	1	0	7	2	0	2
0	6	3	3	7	0	0	4	3	4	1	0	9	2	2	2
3	0	4	2	5	8	0	1	2	0	3	0	1	0	0	1
1	0	0	2	2	0	1	1	1	1	1	0	5	2	0	2
4	0	0	2	1	0	4	2	0	2	1	0	4	0	1	4
6	2	0	1	6	3	2	0	0	0	1	1	0	0	3	2
3	1	1	0	6	3	0	3	1	3	2	0	5	2	3	1
6	0	1	0	3	3	1	1	0	2	0	0	12	1	1	1
1	1	0	6	5	2	1	1	1	0	0	0	3	2	2	2
4	0	0	0	5	1	0	1	0	0	0	0	1	2	1	1
4	0	0	4	3	4	3	0	0	0	2	1	7	1	1	0
3	1	1	0	11	0	5	2	2	0	0	2	6	0	1	1
3	1	3	0	2	1	6	2	2	1	1	0	4	1	3	2
5	1	0	2	2	0	0	2	1	0	0	0	10	1	1	1
2	1	0	0	4	3	5	0	0	1	0	1	2	0	0	1
4	0	0	0	5	3	4	2	1	0	5	0	2	0	4	0
1	1	2	2	7	1	0	0	0	0	3	0	5	1	0	1
2	1	2	2	2	2	1	0	2	2	0	0	1	2	0	2
0	0	1	1	5	1	1	1	1	1	0	0	0	1	1	0
0	0	3	1	3	0	2	1	3	2	0	2	10	1	1	7
3	0	1	3	4	1	5	0	1	3	0	0	3	0	2	3
2	1	0	0	1	3	1	1	0	2	2	0	7	2	0	1
3	3	0	0	3	0	1	0	1	0	2	0	4	2	1	1
5	0	0	0	4	4	4	2	0	1	0	0	5	0	2	0
2	0	2	0	7	4	3	0	0	0	0	0	4	0	0	1
1	0	2	1	5	6	0	1	0	3	1	0	0	1	0	2
3	4	2	4	5	1	1	3	0	2	0	0	2	1	1	4
6	0	2	4	4	0	1	2	1	2	1	0	4	2	4	3
2	2	2	0	8	5	2	0	0	0	0	0	1	5	0	1
1	1	0	2	5	5	1	1	2	0	0	0	6	1	2	0
0	2	0	0	3	4	5	0	0	3	0	1	4	0	3	3
6	1	1	3	3	4	0	0	1	0	0	0	7	2	2	1
3	0	0	0	7	4	1	4	4	0	1	1	1	2	2	2
2	0	5	3	7	0	1	2	0	1	0	0	4	1	3	2
4	2	0	0	4	2	1	1	1	0	2	0	0	0	3	1
2	1	1	0	8	3	1	0	0	0	1	0	1	0	6	1
3	0	4	0	4	3	0	1	0	0	0	0	4	0	0	1
2	1	1	1	7	1	1	0	6	1	0	2	3	0	3	0
6	0	1	0	5	4	2	6	0	1	2	0	5	0	0	1
5	0	0	0	6	1	0	1	1	0	0	0	5	1	0	1
3	0	2	3	1	1	0	2	1	0	1	1	5	0	1	2
10	0	0	0	5	0	1	1	0	0	1	0	2	0	4	0
4	3	1	1	4	4	4	1	0	0	1	0	8	0	4	2
2	1	0	2	4	4	4	0	2	1	0	0	4	2	0	0
5	2	1	1	7	2	1	3	2	0	0	0	1	0	2	0
0	1	4	0	4	3	1	1	0	0	3	0	2	0	1	0
2	0	2	0	6	5	3	1	1	2	1	0	7	0	1	0
4	0	2	1	4	0	0	3	0	2	4	0	3	1	4	2
2	1	2	4	0	3	1	0	0	0	0	1	4	0	1	0
3	2	1	2	2	3	2	0	1	3	1	0	2	0	0	0
4	2	1	1	7	2	0	0	3	2	0	0	5	2	2	1
6	1	3	1	11	5	0	1	0	0	0	0	5	1	3	5
4	0	0	2	4	0	1	0	2	2	0	1	3	1	2	1
3	1	1	3	6	0	1	1	1	2	0	1	1	1	2	8
0	0	0	2	5	0	2	0	3	2	1	0	5	1	2	2
7	1	0	3	4	5	0	1	0	3	0	0	2	1	2	4
0	1	0	4	5	6	0	2	1	1	2	0	2	4	2	3
2	2	0	0	2	0	2	6	0	0	1	0	2	1	4	4
9	2	2	1	6	0	3	0	1	0	2	0	1	0	3	4
0	1	0	1	3	4	0	1	2	4	0	0	1	0	0	2
[truncated: 1,857 more rows]

## Sheet: Figure 5E
1H4__% nuclei with PNAs
biological replicate	S+D 0d R	S+D 1d R	S+D 2d R	S+D 5dR	S+D DNAPKi 0d R	S+D DNAPKi 1d R	S+D DNAPKi 2d R	S+D DNAPKi 5d R	S+D BO2 0d R	S+D BO2 1d R	S+D BO2 2d R	S+D BO2 5 d R	S+D DNAPKi BO2 0d R	S+D DNAPKi BO2 1d R	S+D DNAPKi BO2 2dR	S+D DNAPKi BO2 5d R
23-05_I	13.7168	10.4545	13.1222	9.21053	15.4545	14.4231	29.2453	12.6183	5.2381	7.55556	4.7619	3.18182	6.42202	10.1322	7.17703	11.0619
23-05-II	7.86026	11.5044	8.62069	2.52366	7.07965	13.5135	7.62712	8.96861	0.460829	4.71698	3.50877	1.98413	2.12766	4.89796	3.94737	3.93013
23-05-III	8.78378	5.22876	8.10811	7.04698	9.44625	12.0521	11.0032	10.596	1.82927	1.47493	1.30719	1.80723	4.90798		6.10933	7.71605
23-05-IV	7.87037	10.8504	9.63173	3.42679	13.9535	11.0119	12.8205	12.2642	3.82166	5.72289	6.50155	3.41615	2.17391	7.64526	8.77743	4.71698

## Sheet: Figure 5G_DMSO
1H4_concatenate	MOCK (DMSO)											GraphPad							GraphPad
												Freq_dist_(histogram)							Freq_dist_(histogram)
1d DMSO esiRAD51	1d DMSO esiLIG4	1d DMSO esiLIG4 B02	1d DMSO siNTpool	1d DMSO siNTpool B02	1dR DMSO esiLIG4 b02	1dR DMSO esiLIG4	1dR DMSO esiRAD51	1dR DMSO si NT pool	1dR DMSO si NT pool B02			Bin Center	1d DMSO esiRAD51	1d DMSO esiLIG4	1d DMSO esiLIG4 B02	1d DMSO siNTpool	1d DMSO siNTpool B02		Bin Center	1dR DMSO esiLIG4 b02	1dR DMSO esiLIG4	1dR DMSO esiRAD51	1dR DMSO si NT pool	1dR DMSO si NT pool B02
0	9	0	0	0	12	6	10	1	1			0	57.1429	62.2449	56.4417	57.1429	72.9592		0	50	51.2755	42.1384	67.0918	72.7041
0	18	7	3	0	0	1	0	0	1			5	11.9898	10.9694	9.5092	20.6633	11.9898		5	20.6633	18.6225	23.5849	21.6837	15.051
3	16	0	0	0	4	1	4	0	1			10	10.7143	7.39796	1.84049	9.43877	3.57143		10	9.69388	8.16327	8.80503	4.84694	5.10204
0	0	18	4	0	3	5	0	0	1			15	4.84694	4.84694	3.68098	4.59184	2.55102		15	5.10204	3.06122	2.51572	1.78571	3.31633
13	0	0	0	0	2	14	1	0	0			20	4.59184	3.82653	6.13497	2.80612	3.31633		20	1.27551	4.08163	2.83019	0.255102	1.27551
9	1	0	0	0	0	0	5	0	0			25	2.80612	2.29592	5.82822	0.765306	1.27551		25	2.04082	4.08163	3.77359	1.02041	0.255102
0	15	0	3	1	1	3	28	0	0			30	2.29592	1.53061	3.98773	1.78571	2.04082		30	2.04082	2.04082	1.88679	0.765306	1.27551
11	21	51	0	0	0	1	0	0	0			35	1.27551	1.02041	2.14724	0.765306	0.255102		35	0.510204	1.27551	0.314465	0	0.510204
2	0	1	1	0	0	22	7	14	0			40	0.255102	1.78571	1.53374	1.53061	1.02041		40	0.765306	1.78571	0.628931	0.510204	0
0	6	2	4	0	2	24	0	1	0			45	0.765306	0.765306	1.84049	0	0		45	2.04082	1.02041	1.25786	0.255102	0
24	2	2	2	0	2	4	0	0	0			50	0.765306	1.27551	1.22699	0	0		50	1.53061	0.510204	0.943396	0.510204	0.510204
1	0	19	0	9	9	1	4	2	5			55	0.255102	0.255102	0.613497	0.255102	0.510204		55	0.255102	0.510204	0.314465	0.510204	0
29	9	0	0	8	1	0	13	6	1			60	0.765306	0.255102	1.53374	0	0		60	0.510204	0.255102	1.25786	0	0
0	48	1	12	0	6	0	64	1	6			65	0.255102	0.255102	0	0	0.255102		65	0.510204	0.510204	1.25786	0	0
9	0	1	0	1	10	0	5	0	5			70	0.510204	0.255102	0.920245	0	0.255102		70	0.510204	0.510204	1.88679	0.255102	0
5	0	0	0	22	0	0	70	0	0			75	0.510204	0.255102	0.306748	0.255102	0		75	0.255102	0.510204	0.943396	0.255102	0
1	0	24	0	0	22	8	0	11	0			80	0	0	0.613497	0	0		80	0.255102	0.510204	0.628931	0.255102	0
0	0	30	3	1	0	8	0	0	2			85	0	0.255102	0	0	0		85	0.255102	0.510204	0.628931	0	0
1	10	0	1	0	14	1	0	0	1			90	0	0.255102	0.306748	0	0		90	0.255102	0.255102	0.314465	0	0
10	0	25	19	0	0	0	0	0	0			95	0.255102	0	0.306748	0	0		95	0.255102	0.255102	0.314465	0	0
0	17	17	0	8	0	2	1	0	0			100	0	0	0.613497	0	0		100	0.255102	0	1.25786	0	0
0	8	0	1	0	7	8	0	0	0			105	0	0.255102	0.306748	0	0		105	0.255102	0.255102	0.314465	0	0
35	9	40	3	0	19	1	0	0	5			110	0	0	0.306748	0	0		110	0.510204	0	0.314465	0	0
0	19	22	0	17	31	0	3	3	0										115	0	0	0.314465	0	0
0	14	22	0	0	18	1	2	0	0										120	0	0	0	0	0
10	0	0	3	1	0	0	14	11	1										125	0.255102	0	0.628931	0	0
31	0	0	0	1	0	0	0	0	3										130	0	0	0.943396	0	0
0	13	1	0	0	0	1	0	3	0
0	15	3	0	0	1	1	0	11	0
0	11	3	3	0	12	0	1	0	0
0	0	1	2	0	12	0	1	10	1
13	1	0	5	2	3	0	11	0	0
0	25	33	6	2	23	0	1	7	0
8	1	0	0	1	3	1	27	0	3
0	6	0	8	1	0	0	0	12	1
11	0	14	1	10	4	14	0	11	1
0	13	0	0	0	0	16	0	0	0
25	30	4	0	0	16	5	44	7	0
27	0	0	3	1	0	0	0	17	0
1	40	18	0	0	2	0	0	0	0
1	2	0	2	12	0	1	0	0	0
18	1	0	1	0	0	2	3	0	0
3	0	0	0	0	1	2	0	0	0
1	22	0	0	0	0	19	3	7	0
15	1	7	1	0	10	3	1	4	1
11	0	0	1	0	1	2	12	2	2
5	0	0	1	12	6	0	2	1	0
8	0	0	1	1	1	7	0	1	0
0	3	1	0	0	1	11	0	4	0
12	21	0	0	6	0	0	0	0	1
1	0	1	0	0	0	0	0	0	12
4	0	20	0	15	0	0	4	1	0
1	35	15	1	0	28	1	0	0	6
6	14	2	0	0	17	0	0	0	0
48	0	9	6	5	12	23	6	0	0
0	14	6	1	0	25	0	4	3	0
8	19	1	0	0	3	1	3	1	0
0	1	0	14	0	0	20	1	2	0
10	0	0	6	0	1	20	0	0	0
11	1	29	9	1	1	3	2	0	0
11	2	6	0	0	0	0	4	4	0
8	0	1	0	0	0	1	0	0	0
7	1	30	0	0	2	1	1	4	0
16	9	35	0	0	0	0	23	7	0
0	1	1	9	0	31	1	0	0	0
0	0	0	5	0	29	0	1	2	0
2	0	17	0	11	0	1	2	5	1
8	2	0	0	1	2	3	0	0	0
1	0	2	2	6	0	0	22	5	1
0	5	14	0	3	21	30	4	1	1
1	40	1	0	0	46	5	2	0	9
1	30	20	0	1	0	0	1	0	0
15	0	0	0	0	0	0	1	0	0
8	0	0	0	1	0	10	0	0	1
1	7	2	4	0	0	0	76	2	21
1	31	0	0	0	5	29	13	17	0
7	0	1	0	0	1	1	0	0	0
1	1	13	7	0	31	1	1	1	2
1	14	0	0	0	0	0	0	1	0
0	0	0	0	0	14	0	0	2	0
2	39	0	6	1	7	8	29	3	0
10	2	1	4	2	28	0	1	0	0
5	22	26	1	24	0	2	3	3	0
0	5	20	2	0	0	0	2	0	0
0	8	12	1	1	0	1	6	2	0
26	4	7	0	0	0	0	25	0	3
0	1	12	0	0	4	0	11	0	3
0	21	29	3	0	0	7	0	1	3
0	0	0	0	3	1	0	7	4	2
0	0	28	6	2	1	24	0	0	1
0	0	2	0	0	0	1	0	3	0
10	4	23	3	0	6	1	0	2	0
20	1	0	1	0	0	2	5	0	4
18	0	18	0	0	11	26	0	2	0
3	0	61	0	21	3	5	4	6	0
0	0	0	0	2	43	2	0	0	1
0	1	51	0	0	4	20	75	2	4
4	0	0	9	13	2	1	0	1	10
3	0	4	0	0	1	0	2	10	0
15	0	1	29	1	0	5	9	0	1
0	4	0	0	6	5	8	25	1	0
0	7	0	0	5	1	2	0	1	0
0	0	0	0	1	1	0	87	1	6
1	0	1	0	1	0	0	1	0	2
0	0	2	0	1	2	26	0	1	1
27	1	0	0	1	1	6	6	11	0
2	0	0	0	4	61	4	0	2	4
30	17	1	5	30	3	4	2	0	10
0	1	56	0	1	3	1	1	4	0
1	10	25	0	1	0	9	5	0	2
1	0	1	0	0	23	1	7	2	2
8	1	1	1	1	0	11	2	2	3
2	2	92	11	0	0	4	3	4	28
0	42	3	0	0	1	1	1	0	0
0	2	0	0	17	4	3	11	6	2
5	6	1	0	0	2	2	126	1	2
0	0	0	0	30	1	0	128	0	1
0	0	4	2	0	42	0	2	0	0
0	1	14	0	30	0	1	2	0	2
2	0	102	1	0	0	2	71	0	4
43	0	68	0	20	7	0	30	1	0
1	2	110	10	1	0	14	8	1	3
0	0	0	8	18	5	5	2	1	19
0	0	0	6	0	0	2	0	6	1
25	5	1	0	4	3	27	4	0	2
0	0	3	0	0	40	2	0	4	1
3	12	1	26	4	5	19	1	0	1
0	0	33	39	22	2	0	101	0	16
0	0	0	18	1	8	105	0	0	8
0	0	29	0	0	2	42	0	1	3
95	29	3	0	68	50	4	128	2	1
2	0	0	1	0	0	96	1	2	0
9	0	20	1	22	2	4	5	0	2
0	0	1	3	0	0	2	9	0	0
0	4	1	0	18	0	0	0	1	2
0	1	0	0	30	0	0	0	4	1
10	0	0	0	29	4	0	103	1	0
0	0	0	1	3	0	34	0	0	1
18	1	0	0	0	3	3	1	1	0
0	3	71	1	0	1	5	0	7	0
0	0	0	42	1	23	2	91	1	0
0	1	1	9	0	3	2	2	0	0
4	22	44	0	24	1	2	3	0	14
0	35	5	0	1	0	0	5	16	0
18	1	0	0	0	1	5	50	1	0
1	73	0	0	2	0	11	2	0	0
1	2	1	0	0	0	1	23	1	0
3	0	2	12	15	45	2	0	1	0
5	0	1	14	0	0	1	19	2	0
1	0	0	0	0	0	1	5	0	0
8	0	0	4	0	3	0	23	0	0
2	0	2	3	0	0	0	3	3	0
1	2	0	0	4	3	1	1	0	9
0	0	0	0	2	40	0	116	2	2
1	2	0	0	0	1	1	3	0	0
8	2	28	15	0	1	0	2	1	6
5	88	0	37	0	0	1	98	3	14
0	0	79	15	0	7	1	0	0	3
48	0	2	0	0	1	8	98	0	0
0	2	1	16	6	1	0	3	0	0
7	1	1	1	0	2	1	7	4	0
1	0	17	4	1	0	73	0	0	0
0	4	76	5	1	1	0	98	1	0
9	0	0	0	1	0	0	0	0	2
2	8	1	1	6	2	2	26	1	3
0	0	0	13	1	1	1	0	2	0
0	14	21	9	0	3	2	6	0	1
2	9	23	12	1	1	1	1	0	1
18	9	1	4	0	69	2	125	0	0
0	1	0	0	0	3	0	2	1	0
2	20	1	17	25	1	2	0	3	0
1	1	2	22	1	0	0	23	0	1
0	0	27	4	6	1	1	19	2	0
1	0	1	1	1	89	39	3	0	1
1	4	0	7	0	59	49	0	0	0
0	1	0	5	0	0	0	10	11	2
16	0	1	2	1	1	4	4	2	0
0	0	0	0	0	0	0	0	0	0
14	4	1	10	0	2	57	2	0	4
0	0	0	0	0	6	0	4	1	1
5	3	44	0	2	4	85	1	0	33
1	0	99	0	4	110	12	7	0	29
18	1	3	1	0	6	3	0	3	8
0	17	0	1	11	0	3	0	1	0
0	103	0	1	18	3	0	3	2	1
0	0	0	10	1	6	2	5	1	1
10	26	37	3	4	44	1	14	0	2
17	0	2	5	2	1	79	12	28	0
1	0	3	15	0	14	20	11	1	1
0	1	31	0	0	0	70	26	26	0
0	15	0	3	0	0	1	0	2	1
1	0	72	11	0	2	1	0	0	1
75	1	0	0	0	3	0	9	0	1
17	0	25	28	7	1	2	5	7	25
1	2	0	14	0	2	35	4	10	1
1	63	2	4	2	6	22	8	4	7
0	2	9	21	1	5	2	86	3	2
4	0	0	5	8	7	4	80	0	4
2	0	22	31	54	36	6	19	6	10
18	1	4	3	42	43	7	3	1	2
2	3	1	4	39	14	78	4	2	1
19	4	107	1	2	0	2	72	12	8
2	4	0	5	0	6	3	14	1	3
2	11	6	22	2	0	3	3	1	4
0	1	1	6	2	0	1	130	1	3
0	2	40	7	65	9	28	2	3	2
50	25	2	4	3	101	23	7	13	13
2	0	24	25	6	5	40	5	40	1
2	1	1	0	0	50	10	26	75	2
55	0	0	0	2	48	1	8	56	4
1	0	4	3	2	109	11	10	27	51
0	0	3	1	0	12	5	1	3	4
61	3	1	6	15	6	43	5	3	2
5	1	61	17	2	1	11	5	6	21
0	7	0	2	1	10	2	54	68	3
1	46	0	31	1	8	1	110	32	2
77	35	23	33	2	11	2	17	55	1
1	0	1	2	1	77	4	4	5	3
46	2	29	29	3	106	9	3	31	9
0	0	1	3	1	13	2		2	3
11	1	0	2	1	67	5		7	5
30	3	2	3	2	0	1		13	8
2	4	2	1	0	2	1		1	0
6	1	0	2	8	49	3		1	0
31	69	0	1	4	66	62		3	5
0	23	94	0	3	71	3		7	0
69	2	3	3	3	6	2		3	10
0	0	62	0	1	10	2		47	10
2	2	23	2	0	44	7		1	1
2	0	39	2	0	1	92		12	30
1	86	3	28	0	0	0		0	0
0	2	0	5	0	10	2		0	0
1	2	1	17	0	2	0		5	17
0	0	1	5	1	3	1		1	1
1	3	2	76	17	1	2		1	19
66	2	0	2	1	0	21		0	6
4	0	1	0	2	10	0		3	13
2	1	4	20	53	0	4		0	0
0	0	0	11	19	7	1		3	2
2	1	22	0	1	2	4		2	8
0	0	1	15	1	6	1		0	3
4	12	0	1	2	93	11		49	30
19	0	0	0	0	9	26		0	2
3	8	35	4	0	8	5		3	2
0	3	12	32	6	12	6		2	5
17	50	1	6	2	6	2		3	0
1	0	13	55	1	13	5		1	10
4	0	0	1	1	5	13		3	2
3	0	14	0	3	8	9		1	4
1	5	1	41	3	1	4		2	2
59	1	0	20	2	3	7		1	11
1	2	26	6	3	1	17		1	0
0	0	1	39	1	0	64		1	3
4	0	1	2	0	2	11		81	0
0	44	60	3	0	4	13		0	14
6	59	2	0	39	5	10		4	0
1	3	11	1	3	6	4		1	6
15	0	3	6	12	85	72		2	1
0	2	1	2	1	10	44		2	2
29	1	3	2	1	3	50		14	0
30	1	56	5	8	3	13		0	3
59	2	1	25	4	0	67		3	0
6	0	1	0	0	28	73		9	4
0	2	0	3	3	127	7		52	2
9	52	19	3	1	10	2		0	2
69	3	24	3	0	1	7		1	14
1	0	1	4	2	8	7		5	5
4	0	0	5	1	5	5		10	30
3	0	1	40	1	1	5		26	2
1	2	0	14	0	9	11		3	1
18	1	0	4	2	3	19		0	1
3	3	0	9	0	2	27		1	0
1	2	0	11	0	4	9		1	1
0	1	4	8	0	10	4		4	1
33	0	0	3	1	6	5		0	8
35	34	1	7	32	5	2		0	2
0	2	80	11	5	8	7		2	0
0	0	1	8	0	0	7		0	48
1	0	39	9	0	79	25		6	2
0	0	3	5	7	1	17		0	2
1	0	32	6	2	1	0		24	1
1	0	27	19	9	11	6		22	7
0	0	20	9	1	7	0		4	6
0	1	52	9	5	44	4		1	2
2	2	1	2	4	1	0		2	2
29	1	0	8	32	6	44		5	1
1	6	2	15	3	2	1		4	4
0	8	5	8	3	9	3		1	4
3	0	4	7	22	8	3		2	7
19	0	2	13	0	4	57		4	2
1	25	2	20	0	14	12		4	3
30	0	0	11	3	3	12		4	2
36	1	1	3	5	5	85		6	1
0	0	18	1	18	6	0	1	0	36
1	2	32	3	0	11	1	6	0	4
3	30	45	2	0	0	23	44	0	0
0	3	49	1	2	1	23	2	4	1
9	7	32	2	20	0	0	2	10	0
0	4	0	0	2	0	17	45	0	0
21	5	18	0	2	4	23	4	8	0
0	0	14	0	17	16	0	64	5	0
1	1	59	1	0	3	17	1	1	2
0	0	0	6	1	2	0	0	7	7
0	0	1	0	0	1	1	6	0	13
7	3	33	0	0	2	1	4	0	1
1	42	25	0	0	15	2	5	0	13
6	1	0	9	3	0	4	7	0	0
8	0	25	37	25	1	1	3	5	0
43	10	3	1	1	1	18	9	0	2
25	40	1	0	0	0	2	0	2	0
11	53	0	0	1	1	42	11	0	2
0	9	43	22	0	1	6	0	6	1
18	10	39	0	0	4	5	1	4	17
16	0	32	0	0	8	3	39	1	14
25	0	19	0	0	26	37	3	0	1
1	0	26	1	0	7	30	32	4	0
13	15	46	0	0	1	1	0	2	0
19	14	2	1	2	36	0	11	0	0
8	2	24	1	1	1	1	1	4	0
24	12	20	0	40	1	0	4	0	1
1	4	21	0	1	1	6	35	0	2
2	11	17	0	15	6	1	8	3	0
7	16	3	1	0	2	21	18	10	0
0	8	23	0	0	2	0	0	7	2
1	0	43	8	3	2	2	0	10	1
7	0	35	0	0	3	1	2	1	3
14	11		1	0	2	11	49	0	1
0	0		8	1	3	39	7	4	2
1	0		8	1	0	9	60	4	0
0	45		0	18	0	29	4	0	1
21	9		0	1	13	3	4	6	1
0	0		38	1	0	2	0	0	1
1	1		0	0	2	0	69	0	0
0	0		7	0	4	0	11	1	2
0	12		4	1	16	7	30	0	0
19	0		1	1	2	9	0	0	0
0	38		13	3	1	2	8	1	1
0	1		3	1	1	1	13	0	12
25	0		0	1	23	1	93	7	0
9	0		0	30	2	20	39	3	0
13	23		1	6	0	0	9	0	3
12	0		0	1	1	21	2	6	0
7	0		3	34	1	1	46	3	0
1	1		0	2	15	0	1	0	1
0	0		15	1	1	0	8	0	1
1	4		5	1	23	3	61	0	0
0	0		7	1	11	8	8	7	2
1	1		0	0	0	1	3	1	20
0	2		0	0	0	0	60	0	0
0	24		9	3	4	0	0	3	1
9	0		2	1	11	1	3	0	1
0	0		1	1	3	2	67	0	16
14	0		10	2	10	10	27	1	2
11	0		7	0	7	1	7	0	2
1	22		8	0	1	2	68	2	1
2	1		7	0	10	1	78	0	0
0	5		1	0	16	0	27	0	3
42	50		6	23	4	34	29	1	9
1	10		2	4	2	1	6	2	1
0	10		6	0	25	0	4	2	5
33	49		1	0	1	2	0	1	0
12	0		1	1	14	5	10	0	3
27	22		9	1	2	28	2	1	0
8	2		4	0	2	12	0	0	0
0	0		0	0	1	25	8	0	1
0	0		0	1	0	1	4	2	1
5	0		0	0	1	39	13	2	1
1	0		0	0	1	28	19	8	0
10	7		0	0	43	0	18	1	0
0	0		9	15	49	13	9	2	0
5	7		0	10	31	5	22	0	0
22	32		0	0	0	1	48	0	0
9	6		2	2	49	43	64	0	9
16	0		0	0	1	1	2	39	4
1	18		0	1	54	10	0	2	0
2	2		0	0	6	3	0	0	2
2	19		0	0	1	1	4	5	3
0	0		2	0	15	0	73	0	5
5	0		1	0	4	0	4	0	0
11	14		1	6	21	26	68	1	0
0	0		19	1	8	5	1	0	0
6	25		0	0	1	36	1	1	0
0	0		0	0	2	21	3	0	0
7	17		0	0	14	38	0	2	1
0	11		2	0	14	7	0	1	0
1	1		2	0	9	1	8	3	2
0	0		14	7	13	23	4	0	1
0	0		1	0	0	20	4	0	2
0	0		0	0	3	3	20	0	2
12	0		0	0	0	32	6	3	0
4	23		0	0	0	0	61	2	0
16	20		12	0	1	12	6	2	1

## Sheet: Figure 5G_I-PpoI
											GraphPad							GraphPad
1H4 (Shiled doxycyclin)											Freq_dist_(histogram)							Freq_dist_(histogram)
1d SD esiRAD51	1d SD esiLIG4	1d SD esiLIG4 B02	1d SD siNT pool	1d SD siNT pool B02	1dR SD esiLIG4 B02	1dR SD esiLIG4	1dR SD esiRAD51	ID=1dR SD si NT pool	ID=1dR SD si NT pool B02		Bin Center	1d SD esiRAD51	1d SD esiLIG4	1d SD esiLIG4 B02	1d SD siNT pool	1d SD siNT pool B02		Bin Center	1dR SD esiLIG4 B02	1dR SD esiLIG4	1dR SD esiRAD51	ID=1dR SD si NT pool	ID=1dR SD si NT pool B02
0	22	6	4	0	35	35	52	2	1		0	48.5788	45.7071	54.2929	17.9293	35.101		0	43.4344	35.2941	30.5556	23.7374	32.5758
0	16	28	5	5	0	1	18	2	1		5	14.9871	11.1111	15.6566	44.1919	37.8788		5	23.7374	19.9489	14.6465	34.8485	41.1616
7	2	14	5	1	20	9	2	5	2		10	8.26873	11.6162	4.54545	20.4546	17.4242		10	8.08081	12.2762	13.6364	21.4646	17.1717
3	4	0	2	0	0	4	13	3	5		15	10.5943	12.6263	3.78788	11.1111	5.30303		15	4.0404	7.16113	9.84849	10.8586	4.79798
30	2	4	0	4	0	2	30	1	2		20	5.16796	7.32323	3.0303	3.28283	3.28283		20	3.0303	1.79028	6.56566	4.29293	2.27273
0	2	0	4	1	0	0	7	2	7		25	2.32558	4.29293	2.27273	1.76768	0.50505		25	1.76768	3.06905	3.53535	1.51515	0
0	0	30	4	2	1	6	2	4	3		30	1.55039	1.76768	4.0404	0.757576	0.252525		30	2.0202	2.30179	2.52525	0.50505	0.757576
4	1	28	4	1	2	1	7	5	6		35	3.10078	1.51515	1.0101	0	0		35	2.27273	2.55755	2.0202	1.51515	0.252525
17	39	3	1	3	1	1	9	2	4		40	1.29199	0.50505	3.28283	0.50505	0		40	1.26263	3.58056	1.51515	0.50505	0
67	20	30	3	0	25	5	1	5	6		45	0.258398	0.252525	1.0101	0	0		45	1.0101	1.79028	2.27273	0.252525	0
1	1	46	2	1	1	1	4	5	3		50	0.516796	0.50505	1.76768	0	0.252525		50	0.50505	1.53453	1.26263	0.252525	0.252525
0	4	22	2	0	2	1	10	4	6		55	1.03359	0.757576	1.26263	0	0		55	0.757576	0.767263	0.252525	0	0.252525
13	0	0	6	2	0	17	0	7	1		60	0	0.50505	1.51515	0	0		60	1.26263	1.02302	1.51515	0	0
0	32	6	4	4	13	5	0	0	3		65	0.516796	0.252525	0.757576	0	0		65	1.0101	1.02302	1.0101	0	0.50505
18	3	0	13	4	8	4	2	4	4		70	0.775194	0.252525	0.50505	0	0		70	1.51515	1.53453	1.76768	0	0
0	33	26	2	2	17	1	1	3	0		75	0.258398	0	0.50505	0	0		75	0.757576	0.255754	1.26263	0.252525	0
18	20	1	3	18	1	1	0	1	3		80	0	0.252525	0.50505	0	0		80	1.0101	0.511509	1.26263	0	0
0	1	0	3	0	36	1	1	6	0		85	0.775194	0	0.252525	0	0		85	1.0101	0.255754	0.50505	0	0
0	1	5	20	1	0	1	0	3	28		90	0	0.252525	0	0	0		90	0.252525	0.255754	1.26263	0	0
0	1	0	0	5	21	1	8	4	0		95	0	0	0	0	0		95	0.252525	1.02302	0	0	0
0	0	1	1	3	15	0	3	4	1		100	0	0	0	0	0		100	0	1.02302	0	0	0
3	0	41	5	4	2	0	2	2	0		105	0	0.252525	0	0	0		105	0.50505	0	0.252525	0	0
0	24	0	4	0	2	0	15	2	1		110	0	0.252525	0	0	0		110	0	0	0.252525	0	0
33	15	0	7	2	9	0	7	11	3		115	0	0	0	0	0		115	0	0.511509	0.50505	0	0
1	11	0	3	1	3	2	10	0	4									120	0.252525	0.255754	0.252525	0	0
0	17	0	5	1	19	27	2	3	4									125	0	0	0.50505	0	0
13	1	24	4	11	0	5	0	4	3									130	0	0	0.50505	0	0
1	0	12	1	1	35	1	1	0	0									135	0.252525	0	0	0	0
0	18	1	8	4	7	2	1	0	0									140	0	0	0	0	0
1	16	1	1	3	2	16	1	3	1									145	0	0	0.252525	0	0
0	1	41	2	0	49	17	1	1	1									150	0	0.255754	0	0	0
0	0	36	2	5	0	3	13	0	0									155	0	0	0	0	0
7	0	0	4	3	3	2	1	3	0									160	0	0	0.252525	0	0
0	4	0	4	1	6	0	0	3	15
23	1	2	2	0	0	8	3	3	2
34	2	0	10	4	0	0	0	3	3
0	31	1	3	19	15	1	1	1	10
1	12	24	8	0	1	3	49	1	1
0	1	0	0	6	2	44	8	2	0
9	0	2	6	1	2	0	4	11	0
1	1	0	1	1	18	8	0	0	2
35	2	27	3	6	2	16	70	0	1
14	11	20	1	1	1	0	41	0	3
0	0	29	2	3	6	1	4	0	3
0	0	24	3	5	1	12	1	3	2
13	34	17	4	0	0	13	8	7	3
0	4	1	5	1	3	8	2	8	1
0	0	0	6	1	12	6	19	1	1
0	34	0	7	2	8	9	9	3	3
0	0	8	3	3	35	11	35	3	0
14	20	30	0	2	0	53	0	6	0
1	6	0	2	1	10	39	9	3	3
0	16	0	5	2	0	14	65	2	3
0	1	0	5	10	8	30	0	0	2
14	3	0	6	3	11	25	0	0	3
0	16	1	4	2	3	1	0	5	2
1	26	0	3	2	19	16	0	6	4
5	31	0	1	0	4	0	12	1	3
0	0	1	7	3	1	12	0	7	1
14	24	3	5	1	3	3	0	6	5
0	1	10	12	2	35	1	3	5	2
1	0	52	4	0	42	1	12	0	3
6	2	39	11	3	0	1	5	1	5
2	0	41	2	20	0	3	32	1	0
1	4	0	0	0	11	3	3	8	2
9	22	17	4	0	57	16	3	0	5
4	0	2	5	0	28	7	0	6	10
20	9	0	1	0	0	29	60	3	2
0	2	0	9	0	2	1	63	3	2
0	16	23	1	3	1	2	0	1	5
9	17	26	3	8	1	0	8	2	1
1	27	2	1	1	42	0	7	0	0
1	0	1	1	1	7	1	2	8	1
0	9	0	6	1	13	0	12	1	4
0	0	1	3	0	0	9	5	0	5
3	36	0	10	0	0	1	3	0	3
3	0	0	4	8	19	1	16	4	0
0	2	0	7	0	0	0	32	0	0
0	15	28	2	1	0	16	12	2	3
0	0	0	3	1	0	0	0	2	0
0	1	0	2	8	0	0	1	1	1
0	0	0	4	0	1	0	3	3	5
0	23	0	6	0	0	2	18	2	3
0	0	22	0	2	0	1	13	8	4
0	1	4	3	2	1	1	14	2	0
0	0	1	3	4	1	13	45	2	4
0	1	0	0	0	4	1	2	3	7
1	0	0	3	6	5	3	1	1	4
0	1	1	1	8	2	13	12	6	0
1	2	0	6	9	0	1	7	1	0
1	0	0	3	5	25	1	2	2	2
34	0	0	8	2	5	2	23	1	2
0	0	34	6	7	3	9	1	1	0
0	25	14	2	2	9	0	0	2	7
0	0	2	3	5	3	0	11	0	3
0	0	0	0	3	0	0	11	1	0
0	5	29	6	1	0	10	0	2	1
1	0	0	3	0	5	1	1	2	0
0	1	33	9	2	0	40	0	2	5
3	2	2	28	3	0	94	1	0	9
84	5	31	5	7	4	9	83	1	3
1	1	2	9	9	2	3	0	4	11
0	3	0	0	23	2	9	5	10	2
0	70	0	8	2	1	3	0	7	17
0	0	0	1	3	1	12	71	4	5
9	3	1	0	9	6	66	0	0	8
3	0	42	12	4	1	5	1	1	2
0	112	50	4	2	121	8	0	13	1
0	31	3	10	1	1	35	19	0	0
0	3	0	5	6	4	1	1	3	7
3	20	1	7	5	1	2	2	12	5
0	4	0	4	3	0	1	4	5	3
38	2	1	12	10	1	7	11	1	5
5	0	0	10	5	0	26	17	5	0
3	0	1	14	1	0	0	1	7	4
14	1	42	7	6	3	2	2	4	10
0	1	1	1	8	0	91	0	4	4
0	1	1	9	9	5	1	0	0	5
0	50	0	15	0	1	150	70	2	0
0	1	0	7	3	1	2	5	2	1
0	1	84	6	8	1	2	92	14	4
1	28	0	8	0	1	1	17	7	13
4	1	0	2	3	0	3	59	9	12
0	2	0	2	48	2	4	4	8	5
5	2	0	7	0	5	1	23	4	6
0	2	0	7	0	2	68	107	4	7
0	2	11	5	3	1	0	44	5	1
2	22	5	8	6	106	84	3	12	10
0	0	67	8	0	2	3	126	3	12
0	0	0	8	17	0	5	0	3	2
3	3	1	18	3	10	0	7	5	14
6	32	58	10	0	1	2	9	35	10
0	1	1	1	3	61	11	0	3	1
1	0	1	5	3	0	1	5	1	8
0	54	0	3	8	0	1	127	16	0
16	2	0	3	3	32	1	77	11	5
0	0	3	5	10	7	8	0	17	5
0	3	4	0	0	0	16	11	1	2
0	1	1	16	8	9	24	2	8	8
20	0	3	16	4	0	1	22	6	5
0	104	30	5	2	3	59	0	6	5
0	2	0	13	8	1	0	0	7	11
5	10	59	10	4	1	0	39	1	2
1	3	3	5	2	8	120	0	11	6
0	1	0	5	3	1	9	2	4	2
0	0	26	2	3	3	2	0	0	8
0	0	2	4	4	4	12	11	0	3
26	8	0	12	7	0	23	0	9	19
18	7	1	9	16	11	1	1	5	9
18	3	39	12	7	1	1	0	1	1
1	6	5	9	4	0	3	2	7	4
0	1	60	3	5	2	1	7	9	8
0	0	0	4	2	6	5	5	3	0
0	4	1	7	5	2	2	3	3	5
4	48	1	17	2	3	14	5	1	2
0	34	1	9	11	6	1	5	4	1
86	0	7	5	1	0	7	1	17	1
11	0	0	12	13	1	5	1	8	6
0	0	0	0	11	12	6	2	14	1
0	0	0	1	10	81	9	7	11	4
1	2	1	6	6	4	1	0	8	6
15	5	0	3	1	2	6	11	7	6
4	1	1	23	4	3	100	1	3	1
0	0	2	13	2	1	1	2	11	12
23	1	4	6	3	15	1	11	4	5
3	7	0	6	6	1	40	6	3	3
0	0	0	6	8	2	74	15	2	4
1	0	36	1	2	2	1	0	4	5
1	1	0	5	2	84	100	23	4	3
7	0	79	13	4	5	0	59	10	5
6	2	3	5	17	0	4	10	4	4
36	2	42	4	12	59	0	0	5	2
8	2	1	6	4	1	0	29	6	12
0	0	2	2	3	1	2	3	3	0
10	2	0	5	19	3	0	1	14	2
0	1	2	4	8	0	4	2	10	1
0	1	7	23	2	2	115	0	8	1
0	19	1	17	11	0	0	3	5	14
0	10	2	4	3	26	8	17	0	0
0	1	0	6	9	13	0	0	4	2
0	0	0	3	7	5	7	0	2	6
0	1	0	5	17	0	1	1	10	1
1	0	3	3	7	0	2	81	3	0
4	0	0	11	1	0	1	0	11	4
0	3	0	2	5	2	3	5	8	7
0	2	0	12	1	4	19	114	21	0
0	11	0	25	2	2	50	7	7	1
21	5	2	25	1	1	3	0	2	0
15	0	1	6	24	1	5	2	2	0
3	1	1	8	8	1	4	2	17	9
70	1	0	4	7	2	33	6	0	1
0	1	0	0	16	21	5	1	0	4
1	1	0	8	9	0	23	0	5	2
68	2	1	6	9	3	6	51	4	3
4	3	0	4	4	0	6	7	7	4
2	3	0	14	0	68	8	6	3	2
0	34	0	12	3	2	0	7	3	64
3	3	48	6	8	8	3	77	1	2
15	6	0	14	8	2	10	89	12	14
2	25	39	40	12	6	2	17	6	5
10	10	18	18	4	135	13	14	11	10
77	12	30	29	8	1	3	9	20	15
0	17	9	12	11	5	10	12	10	21
9	15	15	6	2	72	12	28	18	66
11	10	0	12	9	10	1	44	13	22
7	15	0	4	2	17	4	14	16	4
4	8	0	6	10	2	6	16	25	3
14	12	13	11	10	7	17	17	11	4
15	11	14	13	18	72	11	122	13	11
15	13	17	14	5	6	1	10	9	4
3	14	13	10	3	9	6	14	4	28
5	17	21	14	8	11	1	38	13	7
36	18	7	15	3	76	64	16	9	6
9	12	45	9	2	4	8	9	13	2
18	11	8	12	8	5	10	12	19	34
18	17	41	14	0	3	11	31	5	2
6	19	2	22	8	8	6	14	12	6
16	60	4	6	10	12	14	19	9	8
8	17	3	8	8	18	8	26	25	4
3	16	73	14	10	3	2	13	5	7
3	9	3	9	10	3	8	22	42	0
13	14	6	23	10	0	5	40	16	5
1	13	8	19	10	66	4	25	22	4
1	24	1	13	2	11	0	4	7	9
3	21	0	6	5	0	22	13	11	2
3	13	16	17	3	0	41	8	42	2
57	15	0	7	12	3	14	12	8	3
4	12	7	10	8	2	35	15	12	11
13	20	1	11	1	82	4	13	10	8
5	3	1	8	4	7	45	15	14	9
15	12	3	11	8	3	15	18	23	4
65	9	3	17	10	3	5	19	22	8
6	12	2	3	4	1	16	22	6	2
19	9	72	9	13	1	0	79	13	9
6	18	58	11	7	11	4	33	11	8
11	80	2	7	17	36	34	34	13	2
27	17	2	11	3	1	18	15	25	4
25	91	10	21	6	68	11	32	33	8
16	13	6	12	5	1	12	132	8	15
23	5	4	42	14	3	4	83	0	12
5	4	8	14	2	23	12	9	2	2
17	14	2	10	11	5	40	19	15	11
39	15	4	13	5	4	72	8	10	3
14	64	0	13	13	4	55	17	9	16
19	10	3	11	4	5	12	37	20	6
16	9	21	12	5	12	14	22	8	4
15	15	19	2	13	9	38	16	15	5
0	12	8	16	7	85	4	9	17	14
10	11	30	17	1	30	41	18	28	8
13	15	7	11	5	1	46	69	34	6
57	13	9	13	4	7	39	23	16	13
13	45	13	18	4	17	7	12	2	6
11	8	9	20	10	49	8	15	0	7
86	14	29	15	19	7	25	22	37	8
16	41	14	14	9	65	49	8	21	6
14	11	22	0	7	7	47	19	9	20
22	14	12	0	6	6	3	17	16	10
4	21	12	17	7	2	71	14	9	3
53	20	8	5	0	4	44	17	16	20
2	24	8	13	18	10	8	23	10	5
70	54	3	9	9	20	5	16	2	14
12	18	55	18	5	6	68	22	12	2
5	20	3	14	5	6	2	22	14	14
5	25	24	13	2	3	41	21	14	11
10	17	4	5	12	14	5	117	2	2
41	22	2	8	19	18	6	17	8	5
3	18	1	10	7	32	33	160	11	6
1	22	5	9	3	11	2	72	10	9
0	8	0	23	0	5	32	110	19	10
35	25	1	4	13	5	59	25	8	5
13	15	2	6	8	14	2	12	11	8
0	23	7	21	6	3	27	25	9	7
5	17	3	11	14	13	3	7	21	7
2	10	2	13	3	4	3	33	6	5
7	17	3	10	14	3	25	130	17	6
13	17	6	6	3	9	5	24	1	5
3	13	4	6	13	6	50	29	10	8
20	12	79	14	18	30	5	16	9	8
12	20	6	11	13	2	14	10	19	10
12	18	0	8	21	2	8	20	26	3
8	12	39	2	11	44	14	19	11	15
11	60	4	17	19	6	17	17	20	2
9	16	6	17	6	0	27	26	15	6
11	19	2	5	8	0	22	25	10	2
21	11	4	9	5	5	41	10	13	9
15	14	0	17	9	11	96	11	16	6
15	26	3	16	13	1	29	19	7	10
28	14	1	9	4	1	26	17	5	12
19	5	0	16	4	8	30	14	21	3
18	16	69	19	5	5	22	78	11	5
17	16	1	18	0	1	16	22	12	9
18	13	4	29	8	6	28	19	13	6
12	9	3	11	14	1		26	12	10
14	12	0	13	13	4		44	9	50
38	5	66	8	1	0		22	14	7
16	15	17	4	1	5		6	16	6
27	8	18	19	4	33		15	15	12
10	0	3	7	2	79	2	2	7	13
1	2	3	7	2	3	31	1	5	6
45	0	58	5	3	9	0	8	11	2
20	0	44	5	0	2	8	92	15	0
30	8	1	10	3	4	42	1	10	1
0	3	73	4	0	27	40	10	7	19
12	2	1	7	1	13	2	4	3	8
15	2	22	8	9	44	10	2	15	9
1	3	7	7	2	3	8	12	4	5
14	5	28	16	4	1	17	4	3	5
4	0	0	4	7	0	4	67	6	12
1	1	0	3	5	73	9	3	8	2
41	0	63	6	4	36	7	4	12	9
28	0	0	4	3	0	0	81	5	10
0	1	8	5	0	0	2	6	5	3
1	0	0	2	6	24	12	4	6	0
7	0	1	1	6	0	4	91	10	56
2	2	0	7	6	18	10	1	9	3
2	1	0	6	12	0	38	5	4	3
0	0	18	2	1	105	2	1	5	3
28	13	0	3	31	0	17	34	7	5
13	2	0	5	0	47	69	0	7	9
37	0	2	10	0	38	114	40	20	8
9	8	1	14	1	2	43	2	9	8
18	0	0	8	13	7	59	0	24	1
26	2	47	7	7	0	20	12	5	21
0	2	2	8	1	80	1	29	3	0
0	21	21	7	2	4	1	30	7	31
15	2	7	5	6	55	1	61	17	1
9	0	2	1	6	0	6	1	3	6
0	10	17	4	5	3	36	3	6	13
32	0	53	3	4	28	3	1	15	4
2	0	0	9	8	0	1	0	5	3
1	0	50	3	1	23	3	43	4	3
0	0	0	5	7	6	0	5	5	6
0	0	0	5	1	14	2	1	7	5
2	6	0	7	17	66	102	10	5	19
4	2	0	3	7	34	34	0	5	1
6	23	0	12	1	3	0	12	3	10
0	0	0	4	3	0	19	1	7	0
1	0	1	5	4	1	1	9	7	17
33	0	2	2	5	2	54	12	7	1
1	4	50	6	0	0	15	21	1	4
0	0	0	7	1	0	1	60	5	12
0	1	1	2	2	39	2	143	10	8
36	26	4	7	1	70	4	0	10	1
2	25	0	5	4	1	6	91	4	7
0	0	40	5	7	74	12	67	37	4
12	0	6	2	1	43	1	44	12	5
0	15	59	2	4	0	4	1	30	3
0	0	1	2	22	4	94	54	35	15
1	28	0	3	2	61	79	76	8	0
2	2	2	9	1	5	3	1	10	6
17	7	1	4	6	87	9	74	7	7
2	0	3	3	6	5	4	1	7	5
1	21	5	6	3	0	94	0	0	8
1	3	53	4	3	6	9	22	14	1
1	1	0	3	20	58	70	3	14	4
1	10	11	5	3	2	9	2	10	7
0	0	0	1	10	83	25	80	9	8
2	0	0	5	7	69	28	1	4	9
2	0	0	0	10	0	2	36	4	3
48	56	0	10	11	1	5	0	3	17
0	0	0	5	12	5	45	8	4	18
0	12	1	6	2	93	2	2	3	9
0	21	1	1	0	3	0	27	2	5
0	8	0	7	4	1	1	5	8	10
33	0	0	6	4	0	5	0	22	7
12	24	0	4	7	4	60	5	73	5
50	0	0	9	0	0	1	1	6	7
55	3	49	2	3	63	3	1	10	1
1	3	0	3	3	19	65	5	15	5
1	17	39	25	8	2	1	11	15	6
4	0	4	4	5	6	64	1	12	0
0	1	0	9	3	2	102	34	8	3
27	1	4	4	3	9	1	43	12	11
1	15	2	5	1	1	1	11	52	3
1	12	1	3	0	4	1	14	8	1
0	0	30	5	5	10	31	71	47	3
4	0	3	7	5	0	15	12	22	12
9	0	0	1	9	55	2	12	1	5
1	0	1	2	3	2	1	1	2	5
0	16	57	4	0	31	52	4	10	4
0	11	1	3	2	4	33	50	8	8
18	0	3	0	2	61	81	0	2	0
12	0	1	11	7	6	3	2	8	2
1	1	28	1	2	38	5	43	6	2
6	0	16	1	6	17	50	3	14	5
3	5	5	7	3	0	3	16	6	1
37	21	53	6	2	92	0	59	5	5
	1	0	3	4	31	52	0	3	0
	18	0	12	0	2	35	42	6	10
	2	49	3	8	1	1	50	10	7
	1	0	4	1	1	40	4	2	0
	0	0	8	1	0	4	71	2	0
	0	0	1	5	0	1	8	17	1
	0	0	11	2	14	1	43	6	5
	8	2	12	2	0	0	8	18	0
	17	5	16	3	4	0	75	2	0

## Sheet: Figure 5H
% nuclei with PNAs
biological replicate	esipool 1d	sipool B02 1d	esiRad51 1d	esiLIG4 1d	esiLIG4 + B02 1d	esipool 1dR	sipool B02 1dR	esiRad51 1dR	esiLIG4 1dR	esiLIG4 + B02 1dR
147-I (S1+S2)	0		4.21738	2.97447		0		6.51159	0.909385
147-II (S1+S2)	0.2	0	9.89137	10.0881	9.19897	0	0	10.2434	7.43548	8.17143
147-III	0	0	8.69565	9.67742	10.628	0	0	9.95671	19.7044	18.0095
147-IV	0.483092	0	10.7843	5.44555	10.274	0.487805	0	10.2941	13.7097	16.6667
147-V	0	0		12.0603	9.61538	0	0	19.8953	9.79381	8.46561

## Sheet: Figure 5I
% nuclei with PNAs
biological replicate	esipool 1d	sipool B02 1d	esiRad51 1d	esiLIG4 1d	esiLIG4 + B02 1d	esipool 1dR	sipool B02 1dR	esiRad51 1dR	esiLIG4 1dR	esiLIG4 + B02 1dR
147-I (S1+S2)	14.3384		15.8226	37.0801		20.1107		29.0155	44.4767
147-II (S1+2)	16.2	5.61774	17.8501	28.2	14.5366	14.4786	5.8	27.5129	41.2121	26.2176
147-III	16.2562	7.07547	14.2222	18.0952	13.7778	16.6667	7.76699	24.3119	31.068	25
147-IV	14.6552	10.7843	11.8227	23.7624	13.0435	16.6667	8	17.7419	32.0652	26.1147
147-V	18.4211	2.51256	21.7054	34.6939	20.8861	15.8416	4.92611	32.9949	39.8268	9.79021
147-VI	16.0976	2.46305	10.4938			14.9533	4.45545	17.7034
