# Supplementary material for: Topological stress triggers persistent DNA lesions in ribosomal DNA with ensuing formation of PML-nucleolar compartment
Source: eLife. 2024 Oct 10;12:RP91304. doi: 10.7554/eLife.91304 (PMC11466457; doi:10.7554/eLife.91304)
Supplement: Figure 6—figure supplement 1—source data 1. [file elife-91304-fig6-figsupp1-data1.xlsx]

## Sheet: Figure6_FS 1-C
I-PpoI 1d	Total fluorescence DAPI	Mena fluorescence yH2AX		Total fluorescence DAPI	Mena fluorescence yH2AX		Total fluorescence DAPI	Mena fluorescence yH2AX		Total fluorescence DAPI	Mena fluorescence yH2AX		Total fluorescence DAPI	Mena fluorescence yH2AX		1d R from I-PpoI	Total fluorescence DAPI	Mena fluorescence yH2AX		Total fluorescence DAPI	Mena fluorescence yH2AX		Total fluorescence DAPI	Mena fluorescence yH2AX		Total fluorescence DAPI	Mena fluorescence yH2AX		Total fluorescence DAPI	Mena fluorescence yH2AX
142-II 1d SD	1d SD siNT pool	1d SD siNT pool		1d SD siNT pool B02	1d SD siNT pool B02		1d SD esiRAD51	1d SD esiRAD51		1d SD esiLIG4	1d SD esiLIG4		1d SD esiLIG4 B02	1d SD esiLIG4 B02			ID=1dR SD si NT pool	ID=1dR SD si NT pool		ID=1dR SD si NT pool B02	ID=1dR SD si NT pool B02		1dR SD esiRAD51	1dR SD esiRAD51		1dR SD esiLIG4	1dR SD esiLIG4		1dR SD esiLIG4 B02	1dR SD esiLIG4 B02
	4192488	42.5974		4.49953e+06	27.8501		4095421	32.1913		5896660	64.1164		4.00216e+06	28.4771		142-II 1d R from I-PpoI	3233780	37.7197		3534122	29.9191		7678607	60.3332		6.14924e+06	138.474		7565084	133.279
	4174747	37.0952		4422951	39.9449		5260288	34.1538		6.84101e+06	54.4645		6337431	52.5759			2821082	84.8344		3189018	24.9742		7815867	205.004		2823343	28.7988		3526288	28.589
	4567953	30.2649		3900608	30.3983		7.91177e+06	33.4722		4282483	49.9778		5635952	174.588			4016091	52.1234		3437350	39.6515		4093623	37.6943		3095976	33.9682		5363174	140.521
	4331568	26.7461		4228777	24.9999		4353501	46.8854		4670342	54.6608		4085817	38.8457			3.85946e+06	46.2689		4071888	37.4135		6.11602e+06	207.763		3792221	34.7058		3896726	27.9674
	4425914	29.8175		4862572	33.1378		8279727	137.469		3631846	52.876		5133090	214.117			3461027	36.6437		4120592	32.51		7.2309e+06	152.583		3862900	34.9101		3565983	25.9137
	4473898	31.1179		4.38205e+06	26.2915		4413345	28.1284		4028563	47.7224		4642796	26.7867			4146223	36.5226		7.40512e+06	41.7458		7627725	39.2627		2989284	42.047		4033076	31.9229
	3909667	36.0011		4090821	29.7988		4074026	27.6798		3648721	44.889		7229777	158.166			5889183	44.9171		4057136	32.4292		4155432	30.3122		5384575	210.11		3970981	38.528
	4449049	30.4813		4.1761e+06	29.2906		9237760	29.2054		4013663	189.644		7497866	141.277			7561929	46.4038		3531353	35.707		7695825	33.5792		3274547	32.0789		3744340	31.2538
	686113	23.6002		3817787	29.9295		7.4541e+06	47.3064		8.09786e+06	77.4453		4737168	33.3184			7895099	39.2778		4327652	36.7054		3550421	43.4931		2924390	32.7134		3901779	29.7316
	3706642	26.8855		4903031	25.897		8544015	112.678		5154740	48.5769		6764487	120.814			7.03522e+06	52.1581		4030202	47.8672		3667444	28.2709		4115515	50.9092		5590049	175.749
	4766484	30.173		5070867	37.6348		4544693	31.2971		3227646	42.8902		12271939	105.805			4314199	49.8532		4037196	36.0706		2641958	25.1564		3541685	29.3358		4040828	31.0446
	4653267	33.5074		1845062	24.5755		3899505	28.3616		7922891	41.0289		8060233	191.473			3443994	48.2181		3959322	40.6173		9494654	38.0231		3053649	28.3181		4234243	28.5448
	3117809	34.309		4208742	26.5226		8864447	176.944		3336651	33.7565		4603976	24.6188			3370912	58.5246		3997424	40.0902		3338380	23.8573		6.96557e+06	52.0867		3566302	28.4055
	4465762	37.1166		4866546	35.8672		5323590	32.0366		5736257	86.3761		4097223	41.1451			741735	38.949		4465917	36.3403		3632940	31.3155		5571165	49.3868		4777205	151.439
	5088721	58.1541		4437919	39.329		9296699	47.5028		5243149	50.7901		4431582	27.1649			3.92786e+06	51.6838		3372402	31.9467		3.46631e+06	34.8536		5669483	41.6741		3502379	35.8825
	3983334	32.1947		4540625	40.1306		5297620	28.8021		8277555	64.3936		6258518	151.877			4131013	40.4185		4240863	34.9519		3.04693e+06	31.4291		5804991	323.421		5.66695e+06	157.324
	4874630	28.9312		8958146	46.1578		8480889	43.1988		7.10761e+06	178.572		3644423	26.4191			4211870	46.1329		3519564	27.9984		3414854	25.9623		4063990	32.5099		4065378	27.8332
	4551793	30.7083		3716067	24.081		4515812	27.3493		3.78558e+06	49.639		4135375	25.4341			3824379	55.1122		4006520	26.5383		3637169	32.9714		3.58076e+06	32.1732		7205179	140.803
	4710809	73.3953		3890704	24.9962		3831657	31.6784		4504850	51.3056		5590867	245.73			3786045	80.6511		8938140	66.8381		3670941	27.3701		3908719	38.0625		3.61749e+06	24.0266
	5141107	32.4657		4.49888e+06	32.3682		4285120	26.8169		4349265	55.2552		4552341	34.9641			3276564	37.0187		3.85644e+06	61.0671		8842174	40.215		3370877	30.373		8237971	196.173
	4468189	35.0078		3772549	30.9259		3.89394e+06	29.8927		4372916	51.6278		3840810	26.7613			3.75131e+06	40.5917		3539321	30.2145		3444742	28.6927		3174431	28.8631		5691798	159.966
	4671218	39.5559		4198555	33.9483		9272851	36.3208		5063652	60.1419		5274040	97.4815			3599779	38.7763		4426774	30.4687		4263642	31.7515		6.74891e+06	511.07		3588297	32.6874
	4407441	30.3433		4.40961e+06	26.3611		4854537	41.6355		8092279	206.756		3.90014e+06	28.1887			3070228	37.9395		4404707	37.3257		9195595	46.0278		3708400	31.2567		3757141	30.2327
	4175264	40.3867		4819658	35.6835		8.24434e+06	95.4103		7.02331e+06	64.4953		3394118	22.3856			7118000	99.7525		3319883	36.3841		7305718	38.3418		4077802	36.7302		2586172	165.159
	4785061	47.5578		4407063	28.7985		4566194	28.493		5868603	55.3726		4138069	27.3542			3246499	33.064		4149306	43.0752		6734078	191.837		3844737	39.0373		3317131	27.171
	4798947	36.7184		4159435	23.6753		5391983	33.1983		7.33232e+06	62.4313		4359491	106.739			3736933	45.2215		3807194	39.9857		4316543	29.6434		7517949	196.241		4159369	162.408
	4195670	34.8666		6838191	38.0709		9454633	36.319		4567278	56.4524		5834332	154.929			3448660	47.0417		3757545	35.9559		4139526	25.8225		3270791	49.3966		6290320	333.776
	4852513	27.6628		4.67228e+06	29.6521		4769513	61.5013		4.00867e+06	47.0911		6075236	188.673			3842087	32.8446		3578855	24.9335		3.22416e+06	28.2776		3529475	38.2962		8238957	175.639
	4491837	54.1149		5026162	37.8309		5165819	29.9196		6395440	59.6087		3712657	23.8883			4093865	41.1629		7.12761e+06	41.3325		3954791	27.8212		3454628	33.134		7275270	40.3079
	4540039	30.0843		4811505	43.1294		5524843	33.3621		8327517	59.786		4559457	31.534			7.44614e+06	53.4984		3.7202e+06	45.8121		3757044	33.5941		4325755	177.405		3281139	33.9995
	4427264	36.0896		4389535	28.146		3.64346e+06	34.1651		4452658	56.8344		8247642	87.9417			3349163	35.9079		3760482	34.2202		3231594	28.0818		5880585	187.252		7914548	150.936
	4059946	29.3368		4775220	45.3036		790607	40.3441		3821631	41.0385		5.66618e+06	115.398			4185526	41.4713		4336521	36.496		9129084	38.2416		3881878	37.7597		3200136	29.1919
	3877449	26.0984		4603929	32.6066		7521595	28.303		4406688	46.8157		4483131	48.2083			3808065	43.3671		4128271	29.3065		4205116	35.6356		3070705	39.9145		287963	47.0291
	3731282	30.0727		4747491	35.7601		4728367	27.3588		5236999	235.572		4509445	28.957			3809345	40.2826		8883660	46.596		3432385	28.4728		3875607	36.0055		3578314	62.3425
	4550743	33.2367		4.01908e+06	24.6394		6296190	157.477		3395887	58.7112		3780023	26.2623			3436370	47.943		3816423	33.2572		3530874	32.9733		8055428	45.9997		4081697	35.6838
	4091553	38.0752		3692975	29.1815		7400270	157.499		4296135	48.4881		4.18765e+06	26.7425			6259051	53.6949		4332596	42.4632		4255784	41.2989		2977813	35.1964		4256015	42.4814
	4198960	28.6697		6709111	36.423		5839761	29.586		7.21312e+06	106.762		4286253	27.3104			3.83921e+06	41.0742		8809309	87.8001		4056715	29.2978		3356427	28.3413		6.81165e+06	47.2585
	9020706	41.8928		4390260	28.9189		4124282	25.8797		8482584	60.8535		7.56935e+06	130.042			3652665	40.1481		4254618	32.0111		8773072	68.1153		2485393	28.6593		3840022	35.6838
	4588942	26.5255		4733684	46.496		5395690	28.4448		3547084	45.8126		4453632	28.236			3693156	48.312		3.97459e+06	30.819		8019281	33.876		5884206	112.122		3.5207e+06	32.6037
	3871817	35.1732		4259101	28.2042		8561025	34.0337		3334011	44.5899		8547543	31.0943			12027520	49.736		1059378	27.1091		3996732	29.0691		5541971	432.601		3868160	36.4709
	3993856	26.8232		4148262	26.724		5400662	27.0081		4029721	48.0043		3559030	26.9436			4.04017e+06	36.4914		4.0164e+06	36.0644		4452722	26.8413		7957210	49.5876		4580848	127.775
	4745156	38.2983		4.23926e+06	36.5394		8758194	61.7016		3798091	57.195		7933276	132.756			3.12579e+06	37.9564		2399067	30.0919		8240694	92.8432		5719196	57.8339		3152234	37.7803
	4638469	28.0322		4797133	33.2378		10386247	42.0776		7.26218e+06	62.1154		6213009	109.78			3712568	27.9258		3395939	29.876		6.6027e+06	138.346		3141720	28.9195		4198059	35.9657
	8755494	98.1634		4868137	30.1022		4258892	23.3402		4300894	50.7637		7099085	135.046			3787622	35.0718		4077959	34.1537		8148625	35.4357		3421368	27.3811		7.55785e+06	49.4849
	3913706	26.9058		8041956	39.2842		4129316	25.2299		3545314	43.9533		4212342	87.9578			6.93274e+06	45.6011		8812940	33.9651		3473712	28.9127		3714329	97.6711		3416580	27.4919
	4622617	36.1978		3958903	23.7788		3886862	43.3204		6741939	71.8537		6475472	159.295			3474198	40.7987		3871858	34.2007		8449327	47.9803		4474601	163.061		6106466	510.832
	4593991	46.4201		4731672	31.4229		4996648	29.5721		4098345	52.2327		5704397	238.837			3056553	47.6796		3895238	32.0804		3917801	32.4971		3.25475e+06	45.955		2718903	39.7215
	3878022	32.9154		4545681	30.527		2543493	33.7088		4799364	52.221		3840821	24.3598			3057661	32.0984		3652066	44.2791		2.8761e+06	86.9787		6696074	40.3301		5.02399e+06	123.312
	3690738	35.5182		5266803	38.4269		5106672	27.9568		7.11639e+06	90.9347		4061537	26.6619			3947314	35.356		4459368	41.3069		6839607	33.0345		6139036	197.339		3813183	43.6601
	3973902	29.6804		4765753	30.8713		2373948	32.9276		4523620	46.6271		5919092	177.854			3683698	39.311		3537323	29.9606		4.68143e+06	78.6359		3142485	77.6605		5814159	135.489
	4.09662e+06	27.2291		4473079	158.536		9876089	37.4338		6435883	55.4197		7275496	122.532			3436930	39.3775		4019413	28.7359		-77943	96.296		5772989	120.941		3350934	26.5173
	4556185	35.3514		4519470	26.3825		5407571	26.3415		8209776	51.7006		2153176	24.485			3695042	34.8848		4228501	36.3817		8027100	33.9192		6666166	83.9525		2813658	47.031
	3982048	36.0524		4916965	30.0359		5405535	30.9593		8249893	71.7694		1713292	25.2118			3264505	33.5505		4412992	43.4775		8566123	91.226		6444446	44.9638		2938402	27.3492
	4678996	37.3851		9019550	50.6579		4643053	31.3601		3947621	38.9079		4.13927e+06	29.7113			1747422	32.2149		4499799	34.917		3987322	27.9913		6479221	148.736		3808773	41.6615
	3.98457e+06	52.5052		4247981	34.1496		7589091	57.0839		7895825	57.2299		3787330	26.5469			4010760	31.5816		6439924	43.5282		4018867	31.081		5262253	166.721		5373409	157.164
	3.88938e+06	35.7939		4454806	37.4279		5511060	30.7253		5867663	152.393		3569379	26.1495			3692600	37.1912		4043122	32.3441		4213520	32.0167		3271512	27.3894		3761330	42.1506
	4657339	31.9024		3862738	31.119		5124648	31.0548		6059563	56.2088		4606475	26.3905			6.81697e+06	36.6769		2388711	41.1586		3604765	32.5398		8651622	61.6685		5935814	182.408
	1684138	40.7586		4429499	29.9819		10017325	31.5887		8.25314e+06	145.305		4326737	28.8903			3205348	33.8407		3403617	38.8797		9079732	36.5376		3044534	27.5659		4338778	33.814
	2336916	39.7881		4.40973e+06	32.2701		4250644	27.1806		4771404	40.7102		4703348	27.7162			4289934	41.3567		3838952	32.1093		3655049	27.5504		7.26911e+06	216.745		3975952	29.0596
	4282850	42.7693		3.92763e+06	27.2255		7359728	42.1967		6734895	70.0032		3.83783e+06	29.0689			3.97631e+06	41.6156		3420637	44.3413		3118646	29.4747		3330091	35.1826		2952497	34.8854
	9142669	52.5167		4011919	30.1838		5337454	27.6198		6441835	36.2525		5.97589e+06	33.7673			6459189	35.2107		3976468	33.1157		4564076	32.3711		3074314	27.7973		8057179	170.515
	4264712	47.2762		3738965	23.4841		4731526	28.3079		3951221	31.4271		8602188	108.963			3276663	32.0782		3202215	27.5922		6744388	196.632		2991819	31.3662		7314707	76.0376
	4193453	41.519		8964969	38.8393		7440167	35.3502		4668296	36.328		8944541	76.1199			3.79252e+06	40.3968		3721426	44.6361		6107119	202.549		3.66543e+06	30.989		3445692	30.5365
	3768799	36.365		6876065	44.9336		4585263	35.9158		3942676	35.4171		8278794	93.648			3711539	33.3364		4541102	33.9942		6655956	189.608		3166131	28.9214		4333603	27.9047
	3.79019e+06	35.3619		4245800	35.9744		4417139	38.3285		5908924	50.4223		3652215	21.881			3508211	55.9192		4376391	32.2469		7589502	146.846		3716590	38.2351		7261292	214.745
	4137253	29.3927		4582985	26.0374		10071202	36.3409		8521509	50.0944		6275109	170.811			1265333	33.8368		4750846	44.0255		4205860	34.0033		5964042	73.4325		7246481	142.095
	4657902	33.0705		4.66378e+06	25.8482		8480269	30.1632		4.18713e+06	39.8035		4899961	32.4865			3098541	59.1084		8643030	43.6917		3628255	29.4844		3654008	60.3732		5577384	126.379
	4722381	29.1296		4736727	27.8293		7.96352e+06	168.667		9268560	53.3228		3.74213e+06	24.8037			2168348	37.8502		4606412	50.4817		7255360	116.686		6625077	129.701		3346995	23.5423
	9021385	37.7205		4208427	25.378		5737715	28.7275		4403435	42.5632		4337637	27.1352			2991049	36.6611		4.10643e+06	39.4609		7939681	88.7221		3768603	30.0843		3832228	28.4962
	4424469	27.0259		4.69003e+06	28.3413		4248057	39.6944		5534350	44.4431		5994725	158.169			3260551	37.2419		3750215	39.1943		3.09472e+06	24.4847		3287650	26.0196		3118926	26.4833
	3356749	29.5724		8242425	30.5605		9582629	75.3958		5510141	51.7018		6401143	128.279			3192047	39.406		3601466	38.4182		4280294	34.9256		2991664	27.039		4088638	26.4279
	4743473	27.0397		4243553	26.8403		8805948	221.48		7211255	121.954		3.72603e+06	30.5706			3045755	30.1753		4006183	29.0445		4307449	34.0195		3884112	28.9545		6781393	171.057
	5115565	26.6826		4538111	24.6712		5121839	52.6547		4625875	37.8904		8335029	34.02			4.04977e+06	42.9542		3330553	25.7385		3857352	31.8857		3595604	29.1366		3696312	34.5141
	5240259	35.2706		1833736	28.1296		4989850	34.3169		5191913	64.3588		2275270	29.7444			3600276	37.909		3951036	34.5536		8341628	37.3577		3393801	31.8699		7203410	221.848
	4747877	31.1168		2923634	27.6599		5168948	32.7061		1.61051e+06	88.0177		2109230	31.1713			4.18759e+06	33.9619		8418122	44.0915		8362340	34.6544		3665225	45.091		4261392	29.3929
	10035474	42.54		4697193	30.6184		4664784	27.2314		6527413	107.984		3528621	23.7464			3.86924e+06	40.3939		3876596	33.3709		4237485	29.312		2975135	25.7559		4533188	32.9326
	521810	125.687		4996787	41.5337		6635463	37.4065		5552989	266.659		1770316	31.7281			4.04156e+06	50.6164		3848790	29.2115		4944032	181.812		3.59454e+06	29.2729		5927857	161.197
	8385381	53.4104		4289414	27.1723		4519253	32.5456		5250094	63.9342		2.8034e+06	31.2122			4212586	38.2007		4221463	31.0972		8020233	167.846		3743451	27.6468		709944	27.1905
	4559052	33.2476		4.68888e+06	29.2697		5264747	36.9812		8242523	58.2305		6.53363e+06	138.557			4280664	52.5833		4064379	29.7363		5.57924e+06	182.528		4411900	77.1029		2747989	26.7579
	4829230	36.7061		4752011	25.6619		4111749	44.8836		3.62772e+06	55.6473		4.11001e+06	25.2355			3557685	54.3156		4146535	28.6094		4140752	27.5507		4191674	28.1891		3948198	30.9117
	4302132	31.386		4948659	51.6683		4634752	49.9289		4638342	72.1221		3474335	23.3607			3592062	38.4932		3429711	29.0025		4252868	29.2071		3.5608e+06	38.3767		3081608	31.4592
	3927704	34.2434		4869934	30.5781		5551193	29.1336		4788758	71.9758		1618145	32.9516			3760333	43.2932		8049624	44.2341		7698817	40.9442		1150820	32.6891		3838310	30.5542
	5502795	43.4543		4.09729e+06	27.6359		4761779	28.8841		7.91874e+06	90.3793		2373348	31.5658			4421859	49.5079		4079377	29.8272		11788434	50.4334		4114831	33.4293		3882903	26.6329
	4780017	26.0372		4.69293e+06	37.8582		4880029	29.479		4371607	72.1479		6.71508e+06	42.9656			4337806	51.2078		4417807	43.0689		6.30794e+06	180.541		4260835	38.3817		4341184	29.8463
	4899326	41.9775		4189601	27.2004		5409594	31.0155		4721281	79.4868		4406043	44.272			4124737	48.3293		4403774	35.042		7920973	40.4699		2955258	35.9662		3653355	27.371
	4.12101e+06	44.4774		3862386	71.1848		5256234	29.7885		4290808	73.5361		4470252	30.062			4067912	40.8032		4149528	39.1587		6266042	91.6721		6087690	180.802		7004960	274.707
	4259583	24.791		4.54591e+06	29.789		4.16163e+06	32.8454		3679910	54.4875		3927964	24.523			4118240	47.7347		3515554	49.0725		4413252	28.635		3738419	28.7081		4372756	40.3564
	4904452	37.471		3761177	35.0125		5598449	35.4916		4288600	66.6165		4399712	32.7159			1628123	79.4409		3982402	39.0447		3678196	27.4392		2682160	33.513		3693322	38.3363
	4751278	25.3749		7.08473e+06	26.5125		5065229	31.4644		3847500	67.1479		4135603	27.4873			3734134	43.2666		3886733	34.9351		7382012	32.6567		6.64043e+06	206.755		3358602	30.26
	4811124	35.9538		5790392	54.0969		4758082	31.1581		3813602	58.6965		3283308	21.2654			3448690	36.0821		3430203	28.2718		8227317	38.694		2815311	28.6066		3472798	24.7827
	4361316	29.9685		4595716	40.1971		4369597	28.2408		4476801	77.3076		4979806	27.0184			4153443	39.7261		4014694	36.5782		3632907	34.7467		2013468	53.057		7531852	173.235
	3.88909e+06	33.6584		4649972	32.4381		7.14186e+06	61.7473		3642234	60.4799		4069949	23.8912			3754195	39.0996		4440119	37.1401		5090768	110.196		1012167	42.9782		3795388	37.9031
	4085112	38.9407		9285870	31.825		5177812	30.4544		4597554	73.4331		5785279	115.938			3519187	40.3799		3733122	33.3921		4438185	46.7381		4428317	52.2859		3252006	36.5804
	4314135	32.8771		4290366	31.2637		4875713	32.2432		6721503	154.759		6.61447e+06	39.1146			3025172	42.0166		8178862	41.039		4101975	25.9166		3363804	31.1399		9180755	37.92
	3858736	29.0443		4782917	39.0913		5.53753e+06	32.1082		3679567	61.0967		3898271	28.1347			3365431	35.2677		4071807	29.9346		9434186	49.4847		3.10254e+06	29.9859		3788698	34.7605
	4112869	29.3102		4.3002e+06	34.825		5024501	30.794		3.42411e+06	51.0651		3620077	23.1161			3280365	34.7068		3976800	32.708		7875222	223.838		4032749	30.1372		5533355	352.467
	8882383	77.0633		4760030	29.6456		5283509	30.0244		4108466	65.1772		5735575	103.137			3686163	37.2734		7457925	37.9591		4262260	35.5714		3684172	51.8787		4019169	32.8155
	4272057	29.8576		3606738	21.7409		4725496	35.8835		4297073	55.3329		4734851	24.0543			3345892	39.2548		4058365	27.3409		4433374	40.9164		3351704	28.1439		3419872	58.6218
	4672653	39.5861		3955207	27.8185		4.83036e+06	30.2162		2436324	59.0656		6657018	117.947			3.99326e+06	40.8128		3228426	85.8577		4328024	35.1757		7733991	171.841		3.29327e+06	27.5942
	4821308	40.1374		3854709	28.182		4834104	29.2477		3792080	55.1701		4142537	27.0209			4.18719e+06	42.2198		3813773	33.1571		8093434	71.1861		4005028	47.0723		4090728	32.5579
	4198352	30.97		4003320	26.5024		8397288	93.1864		1570857	58.5078		4825417	23.9235			3967740	39.3774		4507894	31.5508		2886351	34.4484		2760678	55.1401		3583838	26.9765
	4953268	36.6183		4663620	27.9652		8473966	30.0663		4201712	65.9054		4399804	24.3962			3953818	40.2952		4434275	35.2682		6840175	136.071		4047084	62.5754		6204418	159.206
	4510072	41.1568		5088071	29.9535		4834040	38.1142		4411214	72.3639		3734996	22.8675			7.56159e+06	65.7025		4217832	31.5904		7783022	185.062		3915925	51.09		3550155	30.1767
	9892544	36.1776		4199598	24.846		8676450	29.0543		4.03331e+06	74.901		4457996	23.0606			8.37978e+06	56.9169		7.4667e+06	40.6279		8830440	35.8374		3.12109e+06	30.8636		7269418	178.324
	4561216	30.49		4829955	31.8421		4733084	31.7522		4034370	50.6088		4213222	25.0714			4121892	60.4546		4402806	35.1736		3284467	27.3794		6.094e+06	313.886		3172514	34.9529
	4695225	33.8815		5006039	31.5976		10255966	41.3677		5565072	212.87		4509037	25.1096			5154795	48.8174		4151642	46.8582		3538441	23.1122		3756597	41.6576		3519241	32.4517
	4442348	36.2353		4359440	31.994		4115454	31.6044		7790597	112.31		7258798	152.138			4003569	34.9868		3487354	32.4929		4322072	37.5422		7187798	134.211		3.59916e+06	32.5006
	8498280	33.1961		4194906	26.3225		7210505	125.978		5474624	57.5523		5151177	71.3451			4304457	48.5875		4056218	35.3777		8285328	146.971		2470047	31.7055		4221119	38.5808
	4541337	51.6941		4842575	27.707		5550646	28.0652		5048451	52.1716		4417194	27.8945			3075425	45.1694		3321946	26.2436		3355233	25.4739		3195320	39.993		3682688	30.6194
	4163610	31.1153		9040756	35.6482		5189053	196.66		6694497	71.7597		4027407	28.7512			3894700	47.4385		4304233	40.8249		5912852	142.676		907045	32.1294		3279802	26.0519
	3819763	31.6299		4261288	33.7137		3078978	193.21		4.07356e+06	46.6433		3626950	25.823			4265270	73.9361		4365706	35.976		3.27202e+06	27.371		3643628	34.9631		8242574	38.3703
	4329947	26.2716		4.31737e+06	31.3368		4232157	29.585		5061764	46.7637		3541623	85.0388			7866129	61.7987		4118350	34.3046		5329216	197.403		6475550	159.031		5612313	117.431
	4595321	39.3739		4485973	31.3098		4601668	47.9589		4725570	51.713		7474632	130.028			3.54536e+06	45.1576		4100313	389.423		8418075	40.4136		6701806	210.249		3.04265e+06	44.0653
	4.17519e+06	38.0761		4567951	28.9207		9299990	96.6234		4191206	49.2776		7208355	69.3222			3403758	41.7979		3386242	27.735		4919174	26.9344		3848088	36.2069		5159239	174.928
	8048101	39.6379		4228865	25.6194		7331656	85.7964		4.06418e+06	62.5573		4768878	32.9805			4011361	45.3108		4.00768e+06	34.2226		4772938	27.8652		2616569	30.1303		3320085	40.1998
	4869255	31.2978		4870032	29.7045		5243096	28.2331		3631159	46.9829		7190117	193.482			3842663	42.5012		4462448	44.3656		2554570	24.0679		3154806	33.9365		6481441	318.011
	4556256	37.1004		4539154	23.8514		4498581	27.9221		6105921	69.1546		4851541	32.3535			3333714	38.7308		3488978	30.6861		3465095	29.4826		3548185	30.0004		3419458	42.654
	4971280	40.3911		4933673	27.0992		9614517	49.8734		3959086	58.8153		5916439	275.448			3869255	41.3177		4224129	33.7547		6716398	50.8128		5116165	77.4251		3559033	154.39
	4321839	45.2174		5238347	39.75		8621321	30.0432		753033	54.8411		4833919	28.4442			3535621	35.49		3619870	26.4027		8533031	34.3515		2705513	29.7071		4095511	100.777
	4132286	26.0261		4398034	32.3223		4.12068e+06	35.1127		4.0222e+06	47.9155		3799886	26.961			3.90668e+06	43.781		4305136	30.1242		3938924	27.002		5.83169e+06	430.778		3956909	184.922
	4755830	46.0923		4842251	32.903		5567529	38.4723		5788091	184.957		6.48731e+06	67.2803			3106136	34.4516		3310236	63.3271		2770377	23.0579		3.49098e+06	40.3073		4068171	33.0732
	3674002	31.5314		4932619	41.794		4456865	25.0865		4070474	56.574		5843382	94.8468			3053120	32.6236		3686822	29.9962		2839742	25.8882		5191750	139.912		2985345	36.8755
	4197015	27.8054		4.36886e+06	33.9674		3949726	38.9883		8.23941e+06	89.3507		7384710	159.185			3039638	40.3545		4040217	41.4414		8995158	46.2786		7425803	135.334		3993784	28.7835
	4246555	25.5804		3975243	32.2403		9362701	41.1141		5342641	57.3395		6797454	66.0627			3568077	32.6452		4034143	32.1157		7016008	129.545		3.46115e+06	39.9449		3870475	43.2155
	4081053	26.9086		4189012	30.0237		4679321	33.1658		4646262	51.9009		7445722	143.407			4096871	45.9421		4193487	33.5209		7198723	244.135		2924565	30.8872		3772051	30.1151
	3748910	28.7671		3599144	29.4211		5106703	37.5956		4677537	48.6472		7.16512e+06	132.896			4202130	50.6474		3536905	37.7105		-153253	35.6338		6655943	124.444		4256964	33.929
	5399675	30.1411		4282181	32.4124		4681653	32.1963		4577496	65.401		3528496	26.0663			3.8452e+06	40.4594		3189108	42.0608		6889817	104.701		3183326	37.1089		5454927	167.43
	4854003	27.9943		4196488	50.2253		4423382	37.2651		6004696	42.9294		2407784	29.9025			3621299	38.7075		3400818	36.9754		5311082	44.65		3399321	42.4489		2984723	38.9051
	4768876	27.3203		4807639	28.971		4473649	30.9908		4566454	43.9646		1659948	29.4967			4103808	34.3227		4238446	37.5845		1999245	46.3497		2858163	37.9474		7601883	291.663
	4774517	43.2251		4042828	26.252		5343794	44.346		4459457	50.1743		3933865	29.0493			3810730	33.4751		4361821	35.4721		6.71532e+06	34.3805		3566554	33.0247		6834189	164.046
	4262781	30.703		8.44675e+06	32.3614		5329357	27.878		4249631	45.1059		3395422	29.5636			3.85865e+06	43.0993		4511577	33.6444		7331881	121.988		3053411	40.2211		823473	29.2175
	4324493	26.4913		9169736	44.2803		9889134	37.9871		6.45466e+06	229.176		6207163	185.028			3508896	39.6568		3639048	30.7707		8708905	36.2794		3047498	47.4919		1898536	34.0847
	9040846	44.1083		4805771	29.6832		4153147	26.06		3377392	44.9444		7425119	137.877			4.11019e+06	33.3081		3993918	40.5768		3898648	27.1598		4265308	173.358		4015367	28.045
	4550114	27.4697		3953678	27.1357		4339412	25.1472		5.86715e+06	42.9154		9347875	56.4354			3928363	44.5726		4573302	37.6465		3655081	26.864		2879478	32.3366		3471776	25.6004
	4239423	27.7481		4604477	34.646		5.24155e+06	30.261		7.82616e+06	47.0111		4687941	95.3667			3192141	33.4843		4275521	37.5484		3421281	25.3794		3606574	29.0617		4064740	39.2628
	4734110	31.2716		4167109	32.6058		9521813	33.7325		7.0765e+06	47.3539		4530733	27.0106			3802227	35.0971		3495264	36.9442		7442754	32.9369		6243260	212.844		5066420	190.499
	4982741	34.6203		4047849	24.2179		4778760	27.8047		4730249	35.9297		5.59489e+06	164.207			3.74015e+06	47.8875		4.06842e+06	36.4326		3306549	27.9058		3648353	43.0585		6.23101e+06	33.6649
	4282737	32.3079		4388615	27.6332		6.30357e+06	156.328		6365404	48.0607		648171	60.3121			4277654	46.3656		3741997	28.8829		8430785	38.1491		3576263	31.323		6905053	201.816
	4283918	29.3169		4226929	29.5806		8.28505e+06	34.3107		7376688	32.3348		8955299	71.043			3871838	37.4018		4057392	38.9073		4233703	30.3418		5785517	148.097		3851007	41.6398
	4813484	33.8606		4354169	34.313		6264238	38.6107		8.01279e+06	137.111		7068664	171.451			3.92622e+06	48.0025		4049466	33.0463		7134721	85.3615		6970488	54.7298		3418737	29.2326
	4746842	27.6914		4.38508e+06	26.8529		7258010	94.9382		3774856	32.2878		6.51417e+06	195.011			1234057	37.817		4326680	40.2143		3879525	27.6638		3296271	49.0212		2864313	29.6172
	4158004	26.0346		4072142	28.728		4486373	26.4946		4257262	33.9413		4481206	25.2484			3192337	38.7392		3850848	33.815		3589040	32.3054		3273499	37.5516		7665175	59.1118
	4203567	33.38		4659032	26.3235		9940358	34.6931		7180935	35.0403		4380232	28.0092			4111105	49.9366		3873933	33.5239		3625926	57.7567		3.17221e+06	51.68		6371017	179.574
	4787877	38.366		4710748	26.4212		4471409	25.8923		7481670	49.0968		5798875	268.509			3564350	44.8331		4105839	41.5929		4083657	28.1074		8246134	39.8651		3954684	129.22
	4753571	45.918		5204853	39.0501		4544469	29.6103		6390539	78.1219		3819605	25.3162			4222980	45.3016		4196928	40.4232		3931604	30.2538		3.55075e+06	48.3182		3638129	33.0236
	5055326	40.3258		3908363	28.0052		4341709	28.2681		4492212	31.1867		5993658	207.093			3950322	57.4109		3721429	35.8422		3.1428e+06	29.9378		3633115	34.8423		5694089	128.583
	4581474	55.6375		3990173	27.215		5524249	28.5551		8828436	48.5396		2276531	26.7597			3534875	44.811		4114333	43.6189		2082442	32.2251		7594410	214.923		4069433	30.0952
	3505958	29.2039		4.23068e+06	40.5566		5183931	37.7975		4013778	44.0742		1847353	28.5414			3565700	42.1185		4425587	33.3106		948793	28.3797		10889107	260.287		3152228	26.8972
	4150209	27.4845		4731027	29.801		5099013	42.0124		3044148	38.8441		4858952	161.752			3424816	37.3177		4058406	38.9471		7301761	36.4026		7.61934e+06	175.733		6.85749e+06	152.639
	4576998	52.6216		7050743	37.0839		6944477	53.7042		6052652	37.7785		4557154	32.004			3670317	37.4714		3677086	28.905		4043404	33.9398		6410574	161.101		3279732	28.9298
	4892717	34.6353		3950068	23.3287		6713451	48.2077		5873261	131.761		4591089	25.9583			3711092	34.7131		3388548	32.1919		4055467	33.1448		7999895	79.3696		4133327	33.1759
	9304162	43.6922		4365261	28.4974		10375552	57.0517		8469789	37.2497		3758674	25.5872			3284125	40.0311		3779774	31.6615		6306372	136.825		6094967	205.887		3.50939e+06	28.0474
	4798988	34.2131		4.0218e+06	34.5552		7575063	34.2612		6.26559e+06	179.761		2960932	31.3479			4085382	32.0528		4146188	37.6217		3454860	33.2651		8136423	118.531		4162051	37.8816
	4674708	34.4303		7.47997e+06	52.6386		4735200	30.7508		4747902	33.0098		1119055	32.2614			3602997	37.6914		3850521	37.6978		8667600	99.8186		5862569	55.8865		4700683	175.871
	4693294	30.4825		3850638	27.6661		4875794	31.3574		3415876	28.1602		5328620	178.253			3240373	38.7619		4092985	45.1641		3725972	28.3086		3991307	33.4766		3675002	33.5965
	4842878	33.6106		4838015	28.9636		7970797	52.3522		4423446	38.1702		4420269	31.1652			3713869	38.6267		3835269	39.2409		8252818	29.8521		6189224	152.438		3.45828e+06	31.4173
	5.04268e+06	36.2702		4609068	40.3158		5080918	30.3479		4581537	33.1112		3943379	29.8409			3913105	49.8743		6847575	32.7344		3645343	36.0445		6775251	42.0016		4098360	31.6513
	4407483	34.0248		4835927	32.391		4651056	39.3824		7052290	161.344		4196486	29.7069			3625467	35.5394		3793103	39.1204		8760046	30.9515		3.48554e+06	32.1361		5567699	155.271
	3821578	47.4899		8505721	37.8733		4896639	25.531		4169184	34.7703		4470519	35.3569			4159585	46.5505		3979956	36.789		4342875	29.3667		3775041	46.4305		4698394	144.086
	5154884	35.1625		4924091	30.3222		6919619	172.879		5880114	287.597		2.09696e+06	32.7823			3150215	37.5615		4239719	39.1676		6765133	124.637		6.65502e+06	37.6733		3222448	36.3829
	4640252	34.1241		4846660	28.5282		9620272	38.4234		4310209	34.137		2298056	29.6767			3698993	44.5104		4749803	32.5611		2268751	38.9875		3476725	46.1216		3728899	29.6859
	4325981	29.1803		4858578	29.5443		5473849	31.9909		4443454	33.6775		3777086	27.0988			4027448	44.0875		4292740	35.428		3709048	29.1072		5.24205e+06	208.362		3309989	26.6593
	3638949	24.5547		4794595	27.4995		8510135	150.313		4312341	32.0529		3.73127e+06	29.961			3256011	34.7647		3647118	60.229		3737445	27.7605		3429458	38.4755		5821619	107.726
	9442490	83.0894		4.56797e+06	26.5348		5456883	37.1555		7770980	41.5534		1513156	36.3591			4123499	35.0544		3994482	34.6065		4187893	36.9276		5241583	170.74		4452473	31.6398
	3735904	29.9148		4745922	23.1067		4873160	30.9792		3464363	32.264		4494571	30.7792			3432081	41.4191		3842799	38.4419		8863978	33.6616		5158007	211.212		4136328	44.1612
	5026788	28.9041		4068413	24.5603		5217821	28.1101		4.05962e+06	36.8467		3.75698e+06	26.8995			3574430	52.8982		4753316	60.2575		8104783	29.6267		3135451	30.7068		7658169	30.668
	4788527	36.8915		4.18171e+06	31.3703		4792947	32.134		4344554	34.1823		3624884	24.84			3324170	39.0496		4297955	49.1093		6931204	128.472		6.95144e+06	182.16		5008949	42.0276
	3791512	42.0411		4394908	31.6978		5126206	30.4852		4937683	33.9658		4627231	28.6796			3252197	39.0604		8644149	47.3247		3.45552e+06	37.3036		8164580	152.872		4632739	173.863
	4229003	46.7919		4202457	31.5904		4654240	27.0281		6453903	57.7032		7258106	153.418			3.86061e+06	49.1638		4219371	36.1179		3791743	32.9588		3519231	31.5482		3404436	29.3342
	3.77448e+06	36.8004		3.93873e+06	29.7439		7742492	149.088		4257707	34.7107		3427915	23.2959			5397313	48.0774		3899681	37.4351		7689975	184.467		2851441	23.579		8718041	32.7652
	4281208	28.1507		3986526	28.3511		5166196	29.2956		8392711	76.2548		6.08447e+06	47.7186			3.24112e+06	34.6298		4.08607e+06	35.3367		4294018	30.36		2775906	27.863		2843777	24.1229
	4699499	28.4438		4856758	26.1443		7344400	94.9237		7509125	48.3741		4033630	121.026			4020164	47.2518		4181692	35.773		3935008	34.0071		3446052	30.9787		4645813	39.5654
	5382322	31.5613		4864526	25.1284		5298482	34.4705		4554395	51.6625		4000674	23.4891			3834911	51.4398		3726082	32.0442		3604401	25.9028		6808593	154.015		3622647	34.6255
	688924	30.3816		4621279	31.2985		3630446	30.8843		4617857	49.8213		6.11686e+06	177.329			2929323	32.7558		3887810	32.4268		4372140	28.1385		5971316	135.726		3586799	27.4041
	4725824	38.8586		4758371	31.1765		4092894	30.1134		4533300	56.0746		4660225	27.7983			3523882	32.2266		3485424	29.9492		3979199	55.0029		6738079	37.6764		3947311	29.9514
	4509496	36.0434		5015936	42.0261		7858087	68.1328		4592279	71.6263		3.81977e+06	25.8644			3636162	39.7892		3572324	43.1803		6864119	62.1648		6045684	230.786		5511798	100.905
	4580644	37.3733		2507844	28.985		9819382	36.6611		4540252	66.9006		3659001	25.0335			3283139	36.4937		4.10013e+06	47.8369		3444207	32.5357		7461716	95.7919		3663329	26.0363
	8703345	31.7154		7.55953e+06	30.9746		4106761	31.2363		3969178	61.5437		4652811	31.6931			3578384	33.4734		3886150	35.7308		8678125	41.0279		2228166	30.723		5927627	137.773
	4570768	34.0891		4710415	32.4043		10268864	49.008		2550889	53.7095		4422769	30.5539			3072156	34.9335		4180990	31.1533		3912970	27.8944		775457	28.2932		3978640	31.4772
	7308007	32.4573		4.67867e+06	31.6165		9709450	45.2542		902108	57.4106		3726035	26.5131			3474025	45.0763		3300299	39.2379		3930562	36.7897		3019231	35.108		3308781	27.4395
	3384732	29.2034		4534803	28.1405		4967387	29.2524		7250238	135.266		4167378	26.2652			2874456	32.3123		3650878	28.5229		8349401	91.2137		4287520	41.8412		3132672	23.8486
	4217479	34.0426		4684489	32.1957		7910099	86.0695		5985463	74.4066		1913469	26.2032			4029534	44.9483		3.72657e+06	37.8079		7.63097e+06	191.802		3103591	31.6566		3505539	27.3877
	4387542	33.8861		3667464	28.0452		7216964	43.6318		4722476	87.0532		4177702	28.5726			3778896	42.3543		3548526	30.2813		3508343	28.1198		3942148	34.7923		5571081	157.716
	4854315	44.4062		8221107	33.9685		5371169	37.0368		4834140	93.7526		2372942	25.4338			3162369	35.13		3893136	38.823		6.65807e+06	166.16		4112025	32.9875		3449393	32.0002
	4.15386e+06	36.8287		4501108	29.7168		5162802	37.8129		5393116	96.0413		4400127	27.7533			3.55337e+06	40.0408		4550949	40.5041		3505942	37.8328		5630580	383.478		6342011	131.021
	4577259	33.739		4224463	25.5288		3834280	27.3327		3847770	83.1314		3315960	23.8993			3956226	69.669		4444797	42.2014		3585853	26.405		6677611	182.487		6516987	158.049
	4187770	31.2505		4042117	36.664		5132199	31.4821		3996495	98.2986		5249181	175.723			3021997	44.9045		3662277	32.0518		4386863	31.8945		3085552	32.3584		7239881	328.673
	3575126	26.6208		4663208	29.4441		4652215	38.7233		3.99777e+06	87.7203		7226692	197.15			3496326	30.1569		4541957	30.4006		3983071	29.7811		16098681	130.364		3769285	24.9288
	5090273	31.7967		4824036	40.5998		9578458	44.8125		6936318	168.055		6612755	73.9575			3.55484e+06	39.9072		3809088	32.8455		3608962	25.9965		2572362	196.026		3.67076e+06	34.4637
	4904687	36.4908		4800610	39.3661		7.76845e+06	95.8955		4303617	109.57		3714019	27.5125			3920895	37.8466		4095710	41.2473		3201709	24.7387		8583440	52.1013		3447740	29.8239
	9510402	35.6974		4401427	28.8915		7723794	120.752		7.06119e+06	258.183		5.39386e+06	160.979			3686905	51.1568		3.87644e+06	43.7405		3499350	31.8176		4021612	31.8776		3511555	26.0414
	5721222	33.2237		4874536	28.7903		8884958	87.0184		6033313	91.3207		3584899	24.9187			3482433	31.0724		3446804	46.0629		9256734	36.4656		3752555	33.5256		6876202	168.78
	4738066	45.3633		2641177	34.2394		4864120	32.0444		4438904	102.568		6.88727e+06	38.4031			3295555	38.7222		4263068	36.0601		4114711	35.7514		3023823	46.0115		4617808	31.2196
	5072942	44.9634		6736773	38.8108		5007407	29.6322		5151696	117.453		4031335	25.4265			3778960	40.7791		3682649	32.5607		8162433	64.8901		4106357	38.6606		3955904	26.6124
	4999520	36.0236		1975667	28.9523		4216577	29.3725		7107655	300.731		3611037	23.199			3895136	38.0279		3916231	35.9467		3156023	33.5003		3895947	40.427		6742740	118.646
	4938486	32.2779		5076252	44.4147		10485829	42.9154		6857347	110.611		8945266	32.2312			3112718	44.5584		4065062	40.0122		3036268	28.5984		3314997	34.5573		5988164	162.658
	4079526	34.0203		8028920	38.2367		5420570	39.0949		4279778	122.983		4518837	27.1533			3384456	36.0199		3661182	34.7326		4239940	40.7178		4044914	41.176		7580366	92.5152
	3821232	30.8368		4576253	28.1565		8714120	176.148		7111916	85.28		4339072	22.9439			3.56756e+06	52.1839		3.72563e+06	27.3689		3544880	33.1085		7422929	381.846		3755598	33.7664
	4.17111e+06	44.2351		4.21172e+06	29.4093		5788412	31.4979		4452789	82.05		7399962	55.4617			3415527	36.0168		4514037	30.1949		8829686	49.0268		3842086	39.403		3869396	33.0086
	4205017	27.0275		3910047	29.2137		4088653	30.0505		4564695	85.5509		3758473	24.5876			6853655	57.4198		3571878	29.3022		7277846	87.6728		3.53583e+06	83.6489		4534919	29.5697
	5009973	33.3609		8195480	31.2993		10254481	46.0064		4664158	83.0179		6317882	131.617			3065044	39.6835		4207554	31.9043		6863370	114.088		2.701e+06	70.5011		4646454	29.3521
	4564906	33.661		3734949	21.9896		5469011	34.7711		3518926	65.8247		5575983	168.886			2924394	34.0819		4358396	39.9187		3581367	30.771		3177287	95.8124		3489635	27.4187
	5422327	38.4203		4.65537e+06	37.9799		4551332	32.9097		2169818	60.9993		3.94358e+06	26.262			2741599	32.8164		4438421	33.1991		3991574	34.8246		3368956	112.255		2860651	28.2634
	5319136	32.137		4647568	31.0956		5094497	47.9752		1329770	57.6958		4108302	25.5544			3165880	37.3455		4136804	34.8864		3039049	30.0761		5392584	203.325		3243289	31.3918
	4940167	29.5632		4721399	31.4648		8461794	32.9732		3538501	60.2951		4824880	33.9211			3616925	35.6646		3472170	33.5895		8651442	27.9326		4349596	148.076		7.74213e+06	55.3445
																	7206597	60.3626		3856816	31.0068		5801308	127.214		6001814	97.1479		3513608	28.049
																	2942291	34.8407		4074364	30.127		3559150	44.0814		4907947	48.9631		3811830	36.9279
																	3.73326e+06	51.8925		6463805	55.9517		4259939	35.8623		3349877	42.7173		4193317	31.0836
																	3.48123e+06	86.9565		7315906	65.9395		7.32228e+06	105.078		3408231	38.8374		5185610	137.652
																	3474545	79.3138		3768314	28.7846		7475240	37.8254		3955763	35.5326		5685732	163.204
																	3.52146e+06	45.9696		3781286	48.4412		4206377	30.528		4161233	41.7197		6617997	46.7476
																	3712476	58.1459		4345209	50.1563		7651145	33.2549		3270801	40.9938		3685217	30.8713

## Sheet: Figure6_FS 1-D
	147-III_1d DMSO)			147-III_1d DMSO)			147-III_1d DMSO)			147-II_1d DMSO			147-II_1d DMSO			147-II_1d DMSO					147-III_1dR DMSO			147-III_1dR DMSO			147-III_1dR DMSO				147-II_1dR DMSO			147-II_1dR DMSO			147-II_1dR DMSO
Mock(DMSO)_1 d R	Total fluorescence DAPI	Mena fluorescence yH2AX		Total fluorescence DAPI	Mena fluorescence yH2AX		Total fluorescence DAPI	Mena fluorescence yH2AX		Total fluorescence DAPI	Mena fluorescence yH2AX		Total fluorescence DAPI	Mena fluorescence yH2AX		Total fluorescence DAPI	Mena fluorescence yH2AX			Mock (DMSO)_1d	Total fluorescence DAPI	Mena fluorescence yH2AX		Total fluorescence DAPI	Mena fluorescence yH2AX		Total fluorescence DAPI	Mena fluorescence yH2AX			Total fluorescence DAPI	Mena fluorescence yH2AX		Total fluorescence DAPI	Mena fluorescence yH2AX		Total fluorescence DAPI	Mena fluorescence yH2AX
	1d DMSO siNTpool	1d DMSO siNTpool		1d DMSO B02 siNTpool	1d DMSO B02 siNTpool		1d DMSO B02 esiLIG4	1d DMSO B02 esiLIG4		1d DMSO siNTpool	1d DMSO siNTpool		1d DMSO esiRAD51	1d DMSO esiRAD51		1d DMSO esiLIG4	1d DMSO esiLIG4				1dR DMSO siNTpool	1dR DMSO siNTpool		1dR DMSO B02 siNTpool	1dR DMSO B02 siNTpool		1dR DMSO B02 esiLIG4	1dR DMSO B02 esiLIG4			1dR DMSO si NT pool	1dR DMSO si NT pool		1dR DMSO esiRAD51	1dR DMSO esiRAD51		1dR DMSO esiLIG4	1dR DMSO esiLIG4
147-III_1d DMSO)	1455239	12.7845		2061487	33.7887		1740432	61.9543		5353470	29.0019		4418513	28.9353		8475457	34.6466				1735589	29.423		1641129	17.4616		1751091	17.729			4105049	26.3478		6879430	95.9982		8278304	44.5058
	1589968	14.7407		1527946	16.2893		1318995	17.417		4730400	30.7953		4265673	29.6849		8604421	39.0274				2589708	25.4583		1729753	16.1356		2139171	91.7748			3258690	36.1114		4394211	91.8484		3549382	29.0626
	1615847	13.8442		1596152	20.7798		3138553	85.3553		4990612	30.4021		8930346	29.6442		6874163	43.7293				2264098	28.3843		2947554	33.401		1.53856e+06	22.2651			3.96789e+06	25.943		4232537	95.1576		3.3535e+06	28.6522
	2774377	19.0425		3945559	23.8105		466860	17.6289		4836964	33.3083		6518872	31.6382		4574376	29.5736				3586454	37.551		3236391	35.3586		1759257	19.9307			4264219	25.9735		4041116	95.491		5.44426e+06	44.0491
	1856742	14.7336		1831865	16.6403		1.79577e+06	28.6923		4.26862e+06	23.4216		11466796	41.895		4305792	25.3577				1342165	34.2967		1903608	17.7172		743567	18.2788			4.20765e+06	35.5926		3666646	63.2024		5088500	49.3463
	3461048	42.424		1421856	14.6139		489248	18.5133		4036116	21.4103		6631166	35.1826		4259564	28.3208				2017839	24.9043		1803680	19.603		640800	17.6537			4058140	25.8553		7790284	80.9062		4.12066e+06	29.2502
	1904896	15.5363		1541674	58.675		1691789	16.6622		7.55401e+06	28.0932		5675520	29.1842		4894971	133.717				2939145	28.7339		1910676	15.8386		1623465	33.134			4304782	27.4846		5081159	169.195		5453153	213.269
	1647593	13.8406		1941615	20.1921		1673551	16.7602		3907339	21.8044		8578153	36.437		9253212	35.785				2.50038e+06	23.9994		1510408	15.8038		1688097	17.364			4249608	28.4081		4.05563e+06	87.5248		4304981	37.6541
	1865736	14.9399		1657356	16.979		1360627	16.4505		4946285	25.6697		5469396	30.3016		4671317	25.1897				2615467	27.1712		3826256	42.1938		1556482	18.4024			5986706	117.112		7814093	56.4528		6386412	47.7458
	2059471	13.7072		1824743	17.8433		515484	23.1107		5434749	30.6806		5381081	27.9038		7.25173e+06	28.9269				2055728	24.7696		1.82261e+06	21.8524		1595576	19.5315			4096211	27.2568		3871156	46.1526		6058690	143.955
	1887284	16.2257		1523646	15.7866		2923758	25.801		5142115	55.4593		11318273	40.5868		10322660	32.1816				3323362	30.0592		1854493	17.0504		1799728	19.3797			4651544	35.8451		4023768	43.8274		3396986	37.1917
	1586751	13.8007		1312090	22.8905		1603218	21.4257		4999122	26.6276		4625930	33.0134		4621712	35.9584				2467543	28.5163		1970190	17.1484		1504453	23.6633			4.58324e+06	36.521		4730869	46.4577		3702687	27.2258
	1863867	14.6407		1340328	20.0976		1333926	15.9238		4680636	24.4256		11943196	45.653		8603623	35.0166				2.63262e+06	27.0139		2.0331e+06	17.5583		2647986	112.317			5058664	43.4906		6512093	46.4329		3798083	28.496
	1799353	18.5797		1693777	45.8792		1772262	17.6813		8.17165e+06	49.8183		5350982	28.6839		7030179	53.5175				2831330	24.6049		3136596	22.2594		1615729	19.0149			4859194	36.9032		7729071	110.174		4039705	27.9672
	1758002	14.8606		1676093	16.6502		1782771	137.6		5069297	26.6944		8663827	197.759		4328795	28.8657				2905291	27.4566		1876110	17.1066		1326546	18.6808			4041349	27.6484		8109413	44.0404		3992277	29.2037
	1843717	17.0678		1.70378e+06	16.7318		974849	138.792		3348411	23.7549		12150591	32.5759		4503445	27.0565				2920004	27.3615		1595408	21.7296		1488957	18.0642			4567500	29.3113		14866717	87.2562		4447467	30.1148
	2101308	13.6717		1384138	15.127		1868677	20.166		2105297	23.0595		6039957	36.3411		4831962	29.6339				2748086	29.9119		1655143	19.5477		2174164	95.729			6314719	59.1804		3487817	32.0075		7965199	232.665
	1.70574e+06	14.3236		1944522	21.7811		1521186	15.1327		6.21255e+06	35.2797		5612792	33.1019		4537512	26.2928				2306030	25.7197		3064521	18.703		1544094	18.9607			4121659	27.7283		4477823	32.1971		8109616	41.9609
	2239629	23.1354		1621251	15.2783		2916844	106.495		4461770	23.145		4953820	32.2462		8826520	200.857				2096643	22.3884		3.19406e+06	44.4618		1452003	17.7721			4515455	28.6074		4208824	30.7612		4210739	34.5704
	1403670	12.8099		1770277	17.3296		1642378	16.68		5919194	130.095		11109458	51.1571		4651194	27.6308				2518490	24.2428		1556087	16.722		3046176	20.4234			4862864	30.2015		3807408	38.9379		3858505	25.5981
	1224317	13.7902		2181915	46.2308		1711595	19.7889		7.96645e+06	34.3587		5200903	31.3993		7.25669e+06	48.3699				2765076	29.3792		1331253	18.7344		1615199	23.1335			4944474	35.0837		4.0798e+06	42.0223		3990720	31.9617
	1.68689e+06	13.392		1612774	16.8724		1289698	15.1379		4.19064e+06	28.6046		3929325	24.0619		5507660	39.8424				2097168	24.9444		1810278	16.5769		1691485	22.3931			4219309	26.4089		4208863	40.7441		8552085	42.2563
	1474494	13.1608		2.08235e+06	59.912		1615230	14.6351		4200520	44.6337		9519426	53.4186		6335775	36.3069				3586553	17.228		1710056	20.7797		1602897	17.9505			4526632	30.5535		4136097	46.5565		3.6966e+06	27.0921
	1400997	29.1334		1680949	18.0824		3039436	17.9526		4.57694e+06	20.7324		5264591	30.3912		6.43998e+06	39.548				1490093	16.1397		1489434	16.34		2217832	41.424			4336509	52.3995		6275376	45.9042		4094771	24.3596
	1693000	15.2424		1381349	41.9097		3802944	20.1925		3565488	37.7159		7844581	237.08		7295888	35.9216				1.68522e+06	16.4788		1870569	16.4252		1.63234e+06	17.8565			4.61296e+06	32.3302		3.91808e+06	34.9638		3.7891e+06	30.198
	1653044	15.3877		1400574	14.2168		3282617	85.3179		4512508	40.3004		7338966	37.5056		4398777	23.3648				1.68557e+06	15.6158		1880846	17.8162		1624323	22.9823			5632050	49.7595		6.6856e+06	81.9813		4372369	31.24
	1438710	15.9727		886138	43.4768		2040518	73.1866		4996002	24.6546		8624212	168.036		4440129	25.8314				1.82528e+06	17.2668		1.90605e+06	17.5357		2307863	25.6631			4425016	35.554		4283868	38.4423		2023536	29.4496
	1925357	17.812		1499348	16.4254		3042765	78.3782		5081920	29.2813		5122668	38.2776		8437082	35.9397				3994731	16.754		1836728	22.5763		1618997	27.9527			4380430	39.321		3773321	30.2093		4222623	31.5396
	2972388	23.2886		2.82818e+06	27.8518		1644693	15.6661		5124679	25.9923		4897858	27.333		8496875	35.8225				1615076	16.2478		3640927	28.4494		1354769	31.436			6570228	56.2223		3571386	29.1109		2072724	33.0104
	1891952	16.349		1469857	19.3624		1.74241e+06	18.1514		4458890	32.2534		4959015	27.0214		6335160	35.0428				1.69924e+06	17.6164		1889953	17.5074		1796147	18.1672			4.22267e+06	26.4059		3915677	70.8152		3879381	38.211
	1573698	14.6099		2210858	22.3126		1523061	15.9431		9465512	38.2897		4981384	28.7264		5132260	30.2339				1566040	15.611		1770791	16.2746		2990773	19.1815			6477621	71.4263		4311370	46.828		3278023	29.1689
	1.79995e+06	16.3859		1720560	18.0844		1867273	19.3018		3.93288e+06	103.151		7.90256e+06	36.8716		4214644	26.1659				1853457	17.2724		1993712	17.6603		3071640	35.1073			4402016	25.8978		8628637	64.391		4128023	31.5017
	2067358	37.0336		1300654	23.9106		1637920	16.7729		8114403	85.1203		4716420	29.4819		9275200	43.2407				1418099	19.3633		1.87652e+06	16.7621		1560563	21.8847			6239658	48.6407		4255631	47.9232		3812687	28.7695
	1967862	45.9469		2350261	42.2666		1620546	65.5026		4.68662e+06	31.9551		11756025	35.6006		4123681	27.1471				1.51873e+06	15.5658		3293259	32.3381		1698298	21.8915			3815215	30.1263		7.07496e+06	175.427		3181341	27.1874
	2089965	23.8314		1631475	19.0536		867289	22.6184		3682644	104.032		4809036	26.3349		5483633	32.4029				1874178	15.9827		1867317	22.67		1683231	22.8146			7629945	45.828		4280513	53.7293		4285131	29.0503
	1555814	16.5399		1524437	15.3548		1298699	75.304		4186379	31.5205		10937806	46.6902		4105895	28.8917				3353294	19.4846		1847083	21.3617		1316531	22.7825			5311879	57.1055		3690773	45.2718		8778256	44.6528
	1457063	17.5146		1796113	58.5814		945342	27.9137		5053559	27.0163		4569011	25.7253		8.30147e+06	39.1251				3565890	16.5875		1787282	16.4283		3427719	86.362			4204619	28.2926		3.46913e+06	45.4145		7973866	59.0157
	1658560	14.9707		1474680	13.7538		1880209	20.1406		4836020	32.6435		11463509	44.9838		7905960	41.4952				3768958	18.5306		1898164	18.6166		1380049	17.5084			5548520	42.5657		7629988	164.795		7213854	221.063
	1439437	14.8066		1710193	36.16		2803427	21.3419		8006771	26.3617		9552633	52.8964		4494590	27.9367				1822259	16.2673		1567438	16.885		1691226	20.1861			6.27742e+06	69.4289		616986	46.1254		4268146	25.3351
	1543572	15.6083		1.85421e+06	16.8858		1873475	19.2626		4603704	23.0532		3912215	47.7226		8330149	84.4867				1962911	17.3418		1.88059e+06	18.789		1385089	16.32			3321817	23.9452		1470239	47.4263		4102062	27.4285
	1177910	15.4833		1888844	27.4454		1722975	16.9692		4097341	35.015		4986476	27.5827		10265040	32.6211				1730963	17.1584		1664585	16.9379		1703017	17.7909			3615996	21.1207		1332582	46.3214		4016872	31.7195
	1631013	16.2742		3918382	35.9882		725039	18.4946		9308560	30.3245		11780164	44.236		4411013	25.15				1868295	18.7203		1698941	17.6681		1723096	16.1654			4428318	24.1549		4588237	76.8595		3834357	32.0362
	1548073	16.47		3383898	45.9991		1.8571e+06	16.2052		5091314	24.2189		5323178	32.2714		4886623	27.3873				3.67189e+06	18.8669		1533166	15.4674		1807152	20.8867			1814505	23.268		3877774	77.2375		4044560	34.5012
	1827980	15.1295		1982765	21.4934		576243	17.3055		4546132	22.1238		5723782	31.8787		8760190	48.154				1454399	16.6221		1.69414e+06	17.8827		1561747	18.386			6172104	40.6881		3430361	73.7082		6.17024e+06	57.9772
	543452	16.0982		1561870	15.4554		1676959	17.7558		2662087	30.0266		9895372	33.511		4786431	29.5787				1.78923e+06	17.3473		1769744	17.522		1.66431e+06	20.2567			5053372	28.4181		3295655	48.228		4342399	36.3394
	1836102	15.7771		1889425	18.5087		2551888	94.2087		2978534	27.0157		9085626	32.203		4613104	29.3097				1872062	23.613		1612590	16.4587		1349072	15.1058			6013677	38.1376		6834264	57.8918		4461899	36.0189
	3669930	37.0551		1842780	17.0314		559417	17.4954		5079209	31.4762		9813963	34.6341		3993673	24.9421				1.50941e+06	18.2786		1353992	13.6564		2765156	102.3			2932311	23.5267		4.0621e+06	70.2886		3619828	28.4355
	3418676	26.5227		1546363	17.1233		1380365	19.094		5453535	36.8497		10783218	30.3636		4887621	31.398				1472749	15.2138		1703905	16.6379		1.82757e+06	25.5112			4443547	30.7455		3250135	29.2804		8258105	249.664
	1545926	13.2034		3584682	33.0291		3.40656e+06	39.6898		4527607	21.6337		5593168	27.4551		8895925	81.4441				1561410	17.8297		2912118	21.4879		1823953	24.2938			7988765	42.3518		3.92968e+06	40.5515		6.44319e+06	175.64
	1389910	17.0355		1889950	19.4429		3750626	21.7336		5551130	27.735		11934741	41.8997		9215520	45.5359				2012869	43.5797		1.57211e+06	22.1402		1863259	23.8638			4846758	24.8106		4107895	37.2224		3734766	29.9786
	1076616	17.2155		1527267	15.1075		1714234	16.9497		5254600	27.6927		4619800	25.2589		4375730	25.5361				1891726	19.6437		1539133	14.9427		1788230	20.6192			2.20385e+06	22.9882		3847806	41.3927		4141579	33.1679
	1814151	14.1733		1726482	26.3272		1475877	18.4833		5254303	24.5773		10404043	28.9725		4797085	31.871				3120529	19.481		1747744	17.959		1510455	18.2358			5164698	32.0331		8.23602e+06	86.7131		4.15464e+06	33.1341
	1807274	20.311		1586800	15.3265		1841643	17.6489		5406825	26.9269		4878129	26.4474		8080121	117.669				1514454	17.3767		3647149	20.4924		1614371	17.2761			4.74784e+06	26.3358		3.7331e+06	65.9183		3526799	28.5926
	2125889	24.5965		2294331	31.795		1798327	20.0325		5146894	26.6211		6008039	31.0071		8888740	37.5442				1545634	17.9867		1629422	16.4408		3167506	113.84			4.37259e+06	24.6106		3783887	67.5487		4226451	32.7068
	3.3626e+06	19.396		1.6358e+06	14.6504		1803123	20.3799		7374883	40.6534		8287071	87.6416		4.86089e+06	23.7276				1718679	16.2435		1932804	20.1037		1444982	16.9869			3896339	23.4754		7.90889e+06	83.4072		8.37664e+06	63.951
	1796389	14.1774		1619120	14.4593		1396904	15.8742		4406096	32.4679		5525572	29.7448		7.31711e+06	34.1239				1335297	14.7495		1471262	15.7481		1475651	26.2887			4834804	29.5004		6992701	69.7543		3564478	26.9366
	1628445	16.2824		1734890	15.1933		1804196	15.1773		4.63814e+06	25.0246		7.74578e+06	29.5817		8756452	52.218				1491671	15.5698		1779260	17.7421		1846923	20.3318			4736755	32.7675		8142301	59.8358		4218365	32.7479
	1556512	16.3506		1678355	14.5225		1688240	17.5109		9068887	64.2998		5455389	21.7736		4462274	25.4231				3281457	18.191		1647214	15.5499		1405863	15.9035			5016250	29.4776		3841630	60.0346		6.51316e+06	187.628
	1661962	15.3252		1589226	18.6224		929962	19.3236		6439997	38.0018		10638595	34.231		4263260	25.4605				1374134	16.9673		1786442	28.451		1792085	24.4831			4470807	29.5535		2887702	27.3951		6213937	57.3547
	1717817	15.4731		1.59231e+06	29.5741		978016	19.7736		7937146	100.332		6295664	39.0377		4828255	29.4278				1734044	16.2882		1.82534e+06	19.9667		2640530	147.848			4.05846e+06	25.1279		4125236	43.4892		8202146	58.581
	1705876	13.712		2055756	28.6894		1747946	20.3977		4.52468e+06	26.1738		8572896	40.938		5116659	26.945				1734976	15.514		1743726	17.0055		1332014	28.9552			8.04182e+06	32.189		4283549	39.0136		3691587	55.587
	2941436	19.1101		1858736	15.5911		3031221	24.2645		4983379	25.3969		10208715	34.3395		4843693	26.8983				1411337	17.6829		4240981	34.4526		1440689	21.0958			4130383	26.6741		3185297	35.5116		3465048	33.685
	2632303	31.356		1756997	14.5912		1735382	19.1803		5006859	25.4408		17617892	62.2862		4474852	32.1204				3.84422e+06	17.1913		2106804	29.6642		1508236	18.5932			8104280	31.15		3838900	28.4216		4108594	31.014
	1816317	22.3092		1685024	15.9047		2919230	80.5858		4965694	23.6889		9917406	42.43		7741967	30.1295				1958342	17.0312		1666667	18.1488		1753749	25.3891			6056020	42.9055		7602133	198.455		3615050	28.8038
	1396694	25.6827		1643256	14.7628		1420517	26.1833		9283226	41.2268		5278898	39.8354		4829741	29.358				1.43309e+06	16.8091		1724713	16.3177		1713761	23.1327			4.21899e+06	28.3213		3882784	34.0232		4479382	37.4118
	2897747	24.7714		1888329	19.3678		1166788	19.4776		5330462	73.6889		7783887	35.9095		4645992	26.5743				1503155	14.6258		1901132	18.469		1.71153e+06	18.4131			5575373	32.6564		1620851	33.8845		3.77635e+06	30.87
	1816732	16.8395		1507506	14.0603		1.80116e+06	21.2906		5196592	25.959		5249112	32.087		4293019	33.5203				1891639	16.3568		1541962	15.0767		1557827	23.2637			7353071	81.68		3480943	42.9685		3443487	32.4126
	1744021	16.9503		1.65893e+06	16.1107		2.02947e+06	26.9625		4666028	22.2719		10722621	40.101		3.95637e+06	34.173				1398778	14.645		1733721	17.345		1735664	24.8218			4.24594e+06	38.9662		2272676	38.791		3.58403e+06	34.717
	3828390	26.2907		1704406	16.3143		2128921	73.9748		4951548	31.9594		4690869	25.2174		4179750	22.5158				1.67602e+06	16.4614		3.61409e+06	22.3511		1.75538e+06	18.1229			7991109	57.3732		6.54929e+06	130.777		4584970	36.1343
	1614289	13.6015		1634085	16.7582		1668700	18.2583		4370898	23.2246		5551733	30.5476		4762325	43.1355				1847130	15.7115		1868063	20.2884		1.77214e+06	18.2946			3957291	26.9706		7.55216e+06	38.7297		4854611	141.894
	1889525	15.6291		2489874	17.5908		1578782	16.0272		4230436	26.1439		4412253	25.2099		9044483	73.6973				1899318	16.392		3.68482e+06	22.3576		1643770	19.3229			4754656	48.3117		3278188	36.0924		7225746	29.9596
	2179401	19.7848		1692342	21.5453		1848510	16.8254		4763361	24.9954		5429237	44.6914		9822932	86.1637				4183228	18.0238		1560094	17.701		1677589	26.4219			4271577	25.5045		3641927	51.5134		4294887	34.155
	2028094	19.3647		1807995	16.5834		2044546	31.2493		4834917	23.8777		10028345	41.255		4371241	27.9041				1510041	15.1233		1755751	17.0487		1517333	17.9754			4616941	32.1645		4.08331e+06	54.688		3945604	30.9702
	2176325	21.9083		1558329	17.4292		2841682	24.7315		3986094	24.6307		10881300	36.9443		5.02466e+06	27.2035				1419731	15.2941		1531038	16.2461		1.71932e+06	18.9008			4267469	33.6752		3542583	28.4707		8656159	47.7894
	3.14356e+06	15.498		1527301	15.0862		3172769	17.1098		7573797	93.5773		658600	466.08		4886774	42.5002				1807770	15.6102		1489012	17.9009		2730787	156.227			5504771	44.8612		7921904	103.026		4077905	29.3504
	1870430	15.0118		1536268	19.5194		1313186	18.24		4743214	23.0949		5089217	26.4277		7927844	67.1951				1582033	16.9995		1635933	18.0413		1748784	17.5962			8.64267e+06	62.7109		7425013	39.7509		8.00614e+06	53.2695
	3368983	21.9864		1747709	46.3362		1597314	18.3275		5146307	24.3444		11054259	34.2726		4986208	34.3882				2.92773e+06	21.1724		1538156	15.6433		1434198	16.9992			4595290	30.5613		4278590	35.6902		4254012	38.4295
	2440474	26.7937		1411381	18.0464		1.93461e+06	18.7957		7647215	63.422		4140148	25.8664		5549650	28.2658				1731187	14.8039		1819253	16.1045		1400761	18.1358			4700943	28.9439		4129933	29.7221		4137557	38.7956
	1615475	20.3775		1753897	16.5075		2670571	30.8665		4.45931e+06	23.8272		4919090	27.4622		6564285	192.282				1684683	16.7816		1732912	16.1205		1536484	18.8993			4231969	31.7818		3282734	30.3698		3596828	34.2932
	1567562	13.7481		1465737	15.357		1667005	17.7374		4976116	21.199		5233508	32.4603		4926323	25.7978				1432284	15.6191		1551553	16.5008		2881654	130.577			4964861	30.1776		434370	26.4047		4.09184e+06	27.6506
	1686729	20.6399		1877182	16.3895		1654701	16.4358		8490321	46.1116		10929963	29.9474		8426084	85.0975				1595572	15.3118		1906645	17.2215		2246256	77.8606			3907886	42.1576		13889014	166.251		6906365	56.3337
	3271550	17.6179		1799984	15.3232		1307221	13.8308		7549115	48.3128		9817781	32.0859		9354287	33.3676				3795975	19.0814		3807475	19.1917		1767543	18.0469			4607063	27.6756		3413528	38.9159		4107302	30.2822
	1557304	18.301		1634284	17.002		1345098	16.0942		8070168	40.414		10807664	31.9552		7120491	107.805				1452052	17.6761		1683256	16.5306		1385262	17.8715			4.36597e+06	39.1457		3.90856e+06	46.69		4418839	39.2468
	1490275	15.7039		1927122	16.4003		1658711	17.3045		5041916	27.1935		4655017	26.6182		5183562	35.5834				1182733	14.1688		1814995	16.9835		1479867	22.4992			4.61086e+06	30.3924		8.02288e+06	58.429		3607173	30.256
	3753948	32.8794		1864746	18.3282		1527057	15.9304		5012630	25.5256		6914496	179.65		1924695	104.253				1137431	13.0896		3048614	19.1748		1394289	17.0042			4362012	48.4307		6839640	61.7003		3960644	33.965
	1815962	15.9256		1626535	28.5039		1.47318e+06	28.2375		2535030	24.2507		10836582	45.2991		4927518	35.4715				1536862	20.3453		1977884	20.7094		1591226	22.3941			4.36658e+06	28.9919		5868235	147.363		3360765	33.8223
	1700058	15.9221		1649151	19.1058		2404653	50.4275		1009931	29		3085643	32.8173		8777804	29.6141				1826999	16.6644		2707418	59.7262		1213595	22.1723			4862162	32.4881		6101735	174.309		4411794	29.5643
	959101	14.6952		3005516	34.5904		2970987	72.4975		9423474	42.731		2304958	32.8069		5495432	50.0505				1408850	15.7924		3811871	35.7968		4669238	83.6033			4.31593e+06	31.8996		3781400	49.3036		6167611	232.993
	1983829	14.7557		1.82179e+06	16.6576		1776097	18.9952		5107278	30.9554		3400220	32.237		4195303	24.5674				1746697	17.1246		3.83641e+06	70.6008		1418144	24.2326			5306823	39.2997		8266645	55.0841		3866109	28.9651
	917828	19.1468		3478129	26.1123		1440752	14.0775		9407413	37.5542		1874754	30.5905		5075369	33.1267				1737883	16.546		2090467	18.7833		1532422	18.7225			4.57662e+06	29.3081		3972662	43.8333		5.59838e+06	142.988
	1968200	15.2679		2349758	27.5521		1.91681e+06	19.2868		3996869	24.6241		4121191	40.9561		5087617	32.0721				3320525	19.0656		1582375	15.7197		1512842	20.5148			7019793	37.3546		4413440	49.9727		3.39327e+06	25.3532
	1768677	16.6678		1055396	17.9148		1522223	15.5181		8456657	38.9312		7.88406e+06	46.5667		6075282	34.0566				1825722	16.7573		1.91092e+06	18.6168		3179167	33.2327			4393657	38.432		4217282	44.9813		4312765	31.3655
	1525358	18.4755		2266680	18.3402		2682822	27.0124		4058625	25.2393		9365008	40.927		4929412	28.7497				1.69433e+06	16.5273		1782693	16.2372		2900496	39.8422			3888440	36.9068		8836845	65.4382		3970794	31.5488
	1873120	18.9565		3554782	17.9596		811550	22.5038		4833457	23.4859		7177044	41.5617		800231	29.531				3857110	29.1533		1974260	18.1875		1535548	17.7563			4817981	35.3496		4056949	51.2131		6327384	144.267
	2748546	20.9209		1548450	16.2913		785467	23.5367		5021107	25.2936		6.22459e+06	35.1925		2167528	26.6135				1702611	16.4264		1898360	18.2939		2089278	40.4821			3929855	31.3973		3370246	48.388		7209052	143.654
	1.87448e+06	15.6813		1707024	16.7465		3452085	23.9099		4106270	22.5595		5280790	35.9715		1422695	27.1861				2674839	31.6099		1.71135e+06	18.1457		1652912	17.5487			4277391	30.5069		4082783	58.0361		3659225	32.986
	1683510	15.0149		1344444	15.8061		1704227	20.6239		5173662	27.9029		5329435	34.535		7770063	37.0105				1.81016e+06	17.8895		1867426	17.2681		1559904	17.9734			4076345	28.8559		7132822	57.5546		8007418	167.986
	2917285	20.702		1482019	14.9117		2298395	51.8464		5.22995e+06	26.8038		4612637	26.9398		5237646	34.3848				377212	19.8031		1715250	17.1474		1535352	17.3484			4199219	49.7433		4274290	55.5555		3958345	35.4533
	1.79428e+06	14.761		1387986	14.679		1590340	16.2588		4331412	21.9432		5239644	31.356		7189640	36.0829				1655931	16.3693		1816323	16.5094		1849882	22.144			4094743	46.014		4117935	50.9067		5797332	136.749
	3580921	19.8007		1933099	17.1136		1432353	14.989		4.68926e+06	22.2312		4033559	28.4427		3946495	25.9437				3300983	18.1051		1639539	14.8536		1804370	21.6373			4063748	23.892		7658374	49.2235		4303752	42.865
	2.05406e+06	19.4259		1967570	41.2715		1728871	16.7349		9687526	37.7969		7316720	185.378		3759793	27.1715				1668419	14.6087		2209697	26.5396		3227372	20.4098			3751524	24.7132		3751308	53.2415		4501630	40.7222
	2841745	34.9305		1480491	14.5954		1815973	18.1191		5033484	28.6151		10277794	36.692		9655768	32.7077				3668657	25.9061		1722401	16.4244		2830675	76.067			7976702	32.3539		4769387	147.01		4352498	37.144
	1559428	15.8599		1688782	15.4077		1603370	17.4553		4522626	27.4806		4643520	27.7477		4591014	26.3462				1829649	15.8015		3182906	16.9973		1502395	15.9018			3618077	22.8729		8.23855e+06	46.7391		3650045	35.8495
	1359365	14.5298		1.87608e+06	15.5978		1648318	16.2578		4842797	24.3905		5177707	27.4651		9228910	48.7296				3326772	18.1977		1563327	18.5856		1661013	23.1938			7491634	48.6115		4.12044e+06	34.9378		4070989	31.0219
	2015429	16.1127		3.05063e+06	41.211		1341478	19.4691		5282664	36.9255		9879727	33.3203		7.76912e+06	46.2594				1.80911e+06	18.6331		1787305	17.3728		1727670	16.9858			4663866	30.3818		4643265	44.0859		4206572	29.7962
	3762404	26.1624		1582932	20.0553		2477300	19.2083		4786418	24.5987		4306502	26.986		4935876	25.4177				1625290	18.4393		2169439	257.953		1548741	16.6331			4.62429e+06	26.2867		8363370	65.0742		3993725	29.3959
	2017154	14.656		1713466	16.1336		1.70367e+06	16.1794		4821652	28.0875		5566068	29.5111		10804507	36.9449				1798485	19.1249		1924334	17.5386		1490423	22.7645			8139198	72.8344		6184806	58.0362		3.84226e+06	27.6131
	2008713	14.2027		3297271	24.7092		2736877	76.9121		4.68739e+06	32.299		6333490	31.2476		7942238	40.356				1697586	18.6844		1694876	17.7925		1626821	16.2165			3732435	26.8633		7170423	54.1316		4374272	32.2835
	1709287	14.1738		1904979	19.8638		1693952	16.8968		7465409	41.943		4212196	26.6224		4306277	34.2672				1958031	17.061		1619475	17.6123		1.7526e+06	18.7334			7.0268e+06	34.2221		9383952	50.7401		3393147	25.5916
	2319499	21.3373		2805918	19.0507		1860226	20.5872		5115661	27.5515		4846064	26.3287		8950525	46.029				2781151	28.8772		2197585	25.9818		1863901	25.5904			4.73925e+06	29.1249		8048330	51.0461		3719541	47.8036
	3484643	18.3196		1615728	15.3614		1686442	17.6121		4693010	23.386		5656466	29.4432		3960294	21.9779				3.30578e+06	17.8569		1986356	20.1815		1565157	30.2039			4356285	32.1672		7146889	70.9403		8870406	39.0199
	1867706	16.0936		1931197	54.9723		1732451	19.451		2250676	22.861		4801028	32.236		4667510	26.4299				3436028	19.0303		2028184	19.5511		1365968	20.6199			7.07144e+06	41.3251		3989334	42.1162		3803979	28.7356
	2004498	18.1095		2624469	27.6707		1.77839e+06	17.0138		2934554	23.5056		5.71267e+06	28.5292		8282344	37.9083				3.55154e+06	19.3158		2127997	20.6678		1.41394e+06	16.4307			4.84769e+06	31.2815		4572717	45.4508		3290183	27.6662
	3214857	17.7974		1.78559e+06	17.4402		1773398	19.1715		5438735	58.0473		5614030	45.1252		4270381	21.413				1700381	17.5938		1733529	17.6684		1560610	16.7229			4.68937e+06	26.6652		3562189	46.2463		3.62257e+06	26.1191
	1883810	13.8332		3365986	19.4276		1556077	15.4947		5785404	54.4527		8034447	35.6612		5341395	26.823				1652049	16.4843		1963148	18.096		3580718	20.297			4.52168e+06	26.2072		4.43502e+06	46.0627		6122533	57.6889
	1.73984e+06	14.648		3605975	36.7083		2829547	66.7511		4487664	22.836		5200818	30.1218		3958695	26.7939				1430205	15.4117		1988182	17.5495		4012743	20.774			4905418	36.1971		4190768	51.8006		4202391	26.1041
	1646578	14.8624		1647263	15.6588		1468909	14.5931		2711486	24.5388		10502044	45.8203		4921102	21.9703				1379420	15.5955		1886024	18.1227		2545089	70.7848			4816228	30.1394		3774779	44.8629		3882031	27.2729
	1613058	15.2563		3469304	24.603		1569054	16.5533		2987288	23.3723		5943271	28.5146		8139949	30.8964				1.46442e+06	15.3417		2.00249e+06	18.197		2500695	105.924			4266910	28.3751		4179527	42.9987		4219362	26.1419
	2.0763e+06	25.2597		1433314	27.5526		1844600	16.5457		5078527	25.9757		9321784	30.8771		10540281	34.1812				1.75098e+06	15.292		2052575	18.0027		1713281	19.6919			2392147	31.4145		5357592	209.265		3575039	23.5915
	2101895	14.6504		3181309	31.5318		1773549	17.8014		8100649	50.4373		4763528	23.9017		4444858	23.782				1.55616e+06	16.0916		1927722	19.7282		1214429	14.1376			3967836	23.1632		3801221	46.8003		3595043	26.0665
	1908687	14.9064		1467339	15.2108		1808258	18.7605		7694755	31.174		5032649	25.1561		5120808	25.3769				1669943	15.9756		3712413	23.0287		1.68907e+06	21.3418			5966004	44.9002		4342134	41.8729		7766622	79.5735
	1512336	12.824		1899960	23.6356		1584057	16.2533		9527787	43.721		11381216	45.6104		9608124	28.5979				1406359	16.6044		1788457	15.9851		1364568	16.1399			4169770	26.8053		3943481	44.6591		5707458	148.139
	1391193	14.6351		1551915	18.6122		1571084	15.6725		4946802	24.5932		5801661	32.666		9994909	39.1392				4322177	51.8462		1914734	19.3119		1826656	19.0415			4538142	27.0089		3.80164e+06	40.6888		4716945	28.669
	2014986	14.2448		2319210	37.3223		1931994	18.1289		5267587	28.4772		5056814	25.6153		3754259	26.0945				1430822	16.5942		1709054	24.7803		1776953	17.903			4.85571e+06	35.8939		4010560	47.0069		5764017	195.007
	3339690	28.1065		1570443	16.3989		1636132	19.9446		4.08476e+06	22.8708		4.19251e+06	34.108		4320245	21.9349				1470693	15.5628		1.50089e+06	16.9772		1765950	48.3646			4531210	27.2275		3925569	45.5552		4398963	32.8653
	3415544	19.9311		1881964	16.9591		1600681	19.4453		4859287	28.7086		10534674	42.8659		9508162	29.8237				1803678	15.8397		1.68331e+06	18.1091		1377055	19.0692			4154314	29.5761		3583975	42.9534		4472169	29.2271
	1549958	13.1579		3428518	22.9721		1825584	16.319		4771159	23.1654		9508083	32.0106		7.35967e+06	42.276				1582979	15.2885		1803229	17.8486		1808873	29.016			4605821	29.1808		6787589	181.084		4269444	31.2093
	2050358	21.983		1678781	17.1134		1510155	14.8108		4615286	31.0187		5792685	25.9643		4137629	22.513				1321486	15.2188		1.83054e+06	22.7407		1845532	20.8194			4556344	25.8154		3744641	42.9278		4165747	72.632
	1522974	15.7344		2.43124e+06	48.3808		1834629	18.1102		4.76743e+06	24.6948		9865870	47.772		8.11349e+06	34.7512				1.81129e+06	16.5199		1607832	16.9269		1089435	76.1846			7701928	36.5226		3825024	42.6802		3706961	28.0894
	1921309	20.1756		1721701	17.1283		816276	21.4855		4570844	25.8334		5051886	30.8577		10589279	26.9544				1.61919e+06	15.7999		1857842	18.9182		1690003	20.3636			4.00035e+06	26.7717		3145816	25.0056		3606830	26.3868
	1470070	13.3077		2567671	43.9583		1021877	21.3157		4013927	22.6921		4799763	26.5205		7461758	157.777				2006547	17.7281		1536478	17.5596		1512324	85.5478			7704998	31.399		3926620	36.4776		4301754	26.7316
	1562769	12.936		1554732	18.8851		843269	16.6295		4989988	28.3536		5880112	26.077		4281021	27.249				1460044	15.1093		3033135	52.976		1506563	18.2769			4321072	33.3846		6645533	269.081		4352999	27.8239
	1463907	13.3021		1511971	20.1133		917535	17.3631		4573204	27.656		10669122	33.0282		4578836	23.0761				4269149	17.6598		1657741	22.6013		1.87527e+06	19.1812			4176162	30.8033		4.12295e+06	30.0055		4248082	35.1706
	2067757	19.7503		574216	17.7527		1540640	15.3891		9631843	40.4898		4962196	28.8311		5235199	23.6388				1802169	15.7848		3084598	18.0265		1559659	24.9641			3515713	22.1225		7.50947e+06	47.5169		3730248	24.8295
	3674937	18.4346		2425499	43.0493		1584595	16.1361		6379904	44.2387		9542863	29.8092		4869920	27.9471				1.80168e+06	14.8619		1674200	15.9507		1.80562e+06	19.9204			4.51387e+06	40.12		3643224	28.3241		3950159	28.5338
	2042342	18.7051		1745130	16.0871		967923	20.8162		4209560	22.6332		10051058	43.8087		4334653	22.6334				1836265	15.9623		1838374	16.9454		1547205	32.4711			3457432	24.0572		6470571	56.6429		7138961	35.5597
	1782742	16.2754		1503996	20.8688		1063179	19.9943		4960075	22.0255		5853784	31.2884		4248778	27.4029				1511876	17.0872		1583793	18.5731		2644714	30.2061			5003400	37.4843		3188743	41.8542		7.68076e+06	150.326
	3401330	15.7846		1730028	15.4051		1848146	17.7045		6413372	40.7899		5029663	22.0929		5308497	27.5727				1985704	15.88		2016777	16.9189		1250824	18.0334			4465341	34.8091		6497476	161.943		4143168	26.1895
	1873669	14.1496		1564831	21.7616		2419707	19.0706		3835834	21.8714		6497828	31.7312		5005404	25.6006				1434000	14.5684		3214225	42.0738		1510452	15.5678			5600944	47.7287		6753379	290.937		4473575	32.5777
	1813260	14.4989		2867764	44.2233		1867292	21.1648		4195016	26.142		4734878	24.859		8830340	45.265				1534362	14.3786		1968188	16.1302		1458837	18.6917			3798526	25.6304		5547330	66.9473		4096280	28.5952
	1982854	14.5433		1363501	26.7067		1565558	18.7134		4097510	22.8014		4704067	41.0068		4558812	23.5625				1981395	15.8215		1709792	16.6272		1675021	16.9721			5621345	41.4563		3982189	40.8841		3740148	27.259
	1644947	15.5026		1533640	14.3739		640274	17.2295		5006530	24.0023		8457042	42.8165		5713396	36.1509				1.6229e+06	18.941		1658405	17.9407		1725439	17.917			4627523	29.7362		3501395	31.3225		4338052	34.5332
	1727778	14.337		1477804	17.2009		1.81274e+06	15.8266		3710448	20.1667		4922283	36.6115		4949893	23.4369				1854094	22.4066		1996913	18.395		1756986	101.07			4.66186e+06	30.6331		3729676	33.5219		3834382	28.344
	4490753	21.7801		1611409	15.625		1846379	16.9996		4.54289e+06	24.4151		10306879	135.807		5043775	29.0412				1299394	16.6912		1.63339e+06	17.5638		1432888	20.7052			6804590	42.2529		8680881	39.6525		4319403	31.6032
	2383810	20.1889		1991698	21.9114		1080756	79.7153		7.98655e+06	56.4653		9707239	35.4024		4560369	29.4804				1784798	15.7224		1846512	18.2635		1336372	22.789			5391257	50.1838		4.01855e+06	34.5063		3534296	25.7443
	1715599	13.929		3.68508e+06	22.9869		1144001	77.7779		4402302	21.4062		10796596	48.7799		4110473	22.8795				3.30373e+06	17.5263		1603438	16.0047		1266859	18.6487			4113652	26.5809		7758954	32.6003		1665125	28.1716
	1770466	17.3156		1468615	14.4725		1547924	15.4386		1368731	28.3788		9825700	29.2415		4952798	29.4749				1768627	15.5946		2083560	17.8285		2832630	29.5376			3544993	25.0641		5627055	51.0298		2096170	27.9238
	3362268	46.0278		1529120	14.4553		1744690	17.0758		5082135	26.6473		10779219	35.1304		5916386	33.516				2267842	24.2642		1933725	34.9111		1812961	21.4767			4528859	29.3024		3.3238e+06	29.2038		3751873	24.8732
	1857616	14.1243		1.78456e+06	31.6336		1.6578e+06	17.1191		2251429	31.3243		4288383	21.7809		4944657	27.9363				1639118	14.7935		1945299	19.1902		1803975	20.799			2.74877e+06	31.8899		6194828	137.967		4429577	38.1242
	1912122	14.5946		1.79412e+06	17.6264		1872740	17.1059		4127696	34.7666		9843607	32.9502		5251422	29.6334				2678363	34.2597		1961989	17.2764		1739513	23.1009			3967658	24.7303		6525123	36.6125		4449577	48.9119
	2.0793e+06	18.3047		1770952	21.6637		1561174	22.2301		4678639	26.4504		10255228	40.1433		4635227	29.9692				1118640	15.3326		1913650	17.0394		1587106	22.4052			4344873	31.6172		4.01635e+06	58.6959		4293545	31.7548
	1942384	14.806		1434023	15.3699		2338176	22.4177		4720607	24.752		10710928	37.6499		2431127	23.1287				1324320	17.6903		1676674	17.5935		1529680	17.9576			2450392	30.9654		8562592	53.6561		4.07018e+06	89.0721
	1729415	14.0637		1634072	31.6916		1563238	17.7904		4.46092e+06	50.9892		4.16377e+06	30.2081		3959195	21.4428				1361767	14.2795		1.63508e+06	16.738		1610031	26.2488			4207499	28.7368		3.65684e+06	41.6315		4107228	84.1543
	1.88237e+06	14.1568		2031002	14.6548		1573179	15.385		7384936	45.3434		7.70244e+06	38.6768		1627194	25.7887				1550522	18.8211		3.48439e+06	19.0179		1666274	18.2899			6532131	42.4695		4269292	62.2914		3486107	26.5056
	1705129	14.5572		2.08428e+06	46.6864		1760421	15.6126		1383025	25.6512		8668061	27.353		5663145	29.2629				1774520	16.6624		1.64466e+06	17.713		1431788	22.1566			3799375	24.2823		7911276	81.4011		3962811	29.4206
	1548734	13.8824		1534092	34.0626		1566635	18.9265		4615756	65.7106		8677402	34.1626		4.35515e+06	22.2257				1568869	14.9897		1.7684e+06	18.5706		1385885	15.6761			3807818	28.4228		6922987	107.25		3969296	46.0491
	1247515	17.6435		1827423	17.0259		1848201	16.7219		4846348	31.5312		5086632	26.6995		4899892	46.8409				1653041	15.7312		1.77509e+06	17.3943		1499468	17.5089			4.33737e+06	36.6752		7854825	36.6304		3717331	39.1799
	1612876	14.1297		1759227	28.5335		1748381	16.9644		5781770	75.7668		3937837	24.1949		4511630	40.9476				3327437	24.8804		1852421	19.8024		1726526	17.0036			4184811	36.9719		3612286	34.5823		4.0294e+06	37.4849
	2.97838e+06	23.8035		1722254	18.6867		1775845	17.2925		7224829	39.2501		4359329	25.4341		4896195	23.6664				1575551	14.724		2999674	21.699		3157454	19.2124			7586361	64.8348		3149914	59.2402		5509702	58.2057
	1686730	14.5627		1645917	14.9547		1684671	18.2959		4650637	25.9016		10778128	33.3055		5282241	31.3155				1181879	14.8378		2906739	30.7294		1418948	15.9814			4717662	41.5518		3.61364e+06	43.936		4315792	37.037
	1841134	38.2039		1901837	15.4848		1754964	24.8225		8750425	80.241		9609409	29.113		4521940	28.2896				1713015	16.3996		1.89416e+06	15.6388		1593558	20.1375			4571679	25.4303		3530762	44.8549		6105937	132.169
	1.85565e+06	14.3259		1990486	18.3503		1686366	16.8061		5347045	33.7373		11410432	40.1269		7004661	46.0081				3177270	19.4685		1678722	16.543		2471377	84.3443			8077326	47.9224		4.16813e+06	40.6264		3224824	48.2909
	1462630	14.8105		2038403	15.9363		1571518	16.354		5720754	36.8316		11117256	33.0994		5118504	23.4672				1450587	16.7153		3309148	17.6067		1568886	18.4948			4270378	30.701		3994310	38.2988		4336951	37.7321
										4.47309e+06	25.5516		5809089	27.6131		5064167	24.8289				1.53394e+06	19.8083		3788278	48.2517		1755789	21.0089			4.30156e+06	30.672		3075106	35.5711		3.45052e+06	37.2407
										4866266	29.4983		5456229	26.6178		4886944	48.3282				3449391	16.0677		2075693	18.4036		1.43174e+06	16.6145			3.99387e+06	27.8134		8203472	35.5222		3818271	34.7775
										4229112	31.7219		10095880	43.4274		9665427	102.904				1.53626e+06	13.8155		1998113	20.2279		1668036	23.2891			4749322	33.1814		4.10098e+06	31.5138		2019420	30.4905
										4.402e+06	21.8626		5102570	31.0001		5339019	35.5759				3438821	93.5018		1801064	18.9187		1553502	18.9951			4.83154e+06	37.4916		2953189	32.6622		1715143	32.6911
										4227734	23.1322		9851344	39.2404		4858228	54.7538				1823377	19.389		1626735	16.7408		3108235	90.7991			4030879	25.9384		3599690	29.6058		4079693	39.3664
										5098981	26.4453		1.6302e+06	33.4855		4.18821e+06	29.6622				1526626	17.2478		1890135	18.2208		1451801	17.235			4.30335e+06	33.3906		8389181	38.8237		6660864	158.236
										4343254	27.1134		2604080	34.3999		5336238	37.2988				1767994	17.8272		1046394	18.3001		1677998	18.4927			4.07034e+06	30.3086		7978137	40.4517		4312404	39.2201
										4957206	25.4192		6.24411e+06	77.9332		4669410	38.626				1347499	17.5883		1926528	18.1502		1582696	18.6828			3700320	24.0955		4212386	27.824		3649568	36.104
										5375898	27.9212		10734398	40.1965		4958351	44.4051				1767645	15.3721		1161672	19.5418		1242380	17.8127			4372182	33.7845		4791634	36.4673		3082366	28.5674
										4978028	23.5953		4446687	29.3713		8536576	51.3477				1711262	21.0628		1696370	18.9471		3107321	30.851			3568449	24.8968		7146964	46.8216		4092615	36.1261
										5080059	29.4321		9044453	47.5015		10836332	70.832				1482709	15.7657		1.64003e+06	17.6093		1.81092e+06	25.7485			3790480	26.6308		4210557	37.4741		4394053	40.5552
										7332933	35.5645		4170283	24.3053		11788199	31.6164				3527875	19.4403		2.02589e+06	17.8911		1530710	32.2955			3541012	27.2022		4050891	38.0359		4733061	72.7478
										4.5786e+06	27.8048		4581939	29.0816		4754343	26.5629				1.76326e+06	16.5949		4169759	30.1343		1543951	21.5362			4151543	27.519		3.88584e+06	34.267		4.055e+06	35.1935
										3926940	22.9272		5731852	29.8874		4801570	36.2776				3273460	18.3607		2020275	24.163		1681655	16.8655			6396420	56.545		3990089	59.478		4121346	38.8937
										5135966	38.9227		5016938	27.4811		4720850	29.2466				1.3933e+06	14.8431		1939847	21.4364		1510167	15.7204			4361042	27.9795		5905644	151.45		7334059	39.5307
										5382909	24.5917		5504442	27.7209		9520861	135.702														4820196	46.9312		3987891	51.163		4337362	34.5761
										9190110	95.9409		4761862	29.7698		9128823	118.409														4.57674e+06	29.3361		8066267	49.4519		3489333	37.3949
										4816261	23.9082		7.78448e+06	65.0002		4116456	26.0529														4765102	30.8944		4342634	52.7879		3187324	31.0407
										4.69223e+06	23.5551		7690788	56.8771		1074791	29.0227														4774518	40.9683		4436720	47.6502		5388112	175.006
										4573153	25.4775		5627512	147.182		3218426	30.104														4070155	27.1586		4155779	49.3195		7.74906e+06	40.6058
										4.61745e+06	25.3394		8415864	42.2003		4441616	29.6076														5255510	51.7135		6850588	54.4165		6464492	154.903
										5662144	33.7317		5106225	38.002		4839470	30.1696														4326286	27.0602		7447251	50.6645		3440011	31.4016
										5196730	32.3221		10002042	38.6025		8530352	46.8299														3880994	26.2883		3592292	45.6031		4078797	41.6226
										4942677	28.7857		5189392	47.5027		4768344	27.5353														4.23868e+06	26.5791		6554717	180.357		7105450	152.504
										4538830	25.4008		5195777	56.8416		4905955	34.7878														3937059	23.7672		8364084	70.3742		4141960	39.7483
										5168676	26.2372		5044746	53.6746		10763720	35.3522														6172365	51.1794		9133075	66.6392		3867763	45.0618
										4807064	32.7192		4548950	31.1582		4566073	26.1307														4638407	27.1844		7340118	278.677		3561320	35.5779
										5165204	24.769		9260466	32.088		4826449	38.7175														4546522	25.9855		6600869	261.464		5.72212e+06	212.866
										4063787	21.7648		4644480	31.2723		9206801	41.8027														4374236	28.8026		4250180	51.205		3589551	38.2525
										4215635	24.1761		10554088	48.4759		5.6938e+06	30.8571														3846538	44.9478		4407968	47.8233		7094278	223.876
										4653556	24.7379		4538469	29.9818		9298248	32.2845														4521193	27.4319		3407902	37.017		6729332	41.3805
										4819978	25.6914		9498435	106.043		4324854	26.9064														3755650	45.6019		4339662	38.036		7993079	49.6532
										5150489	24.7359		11014867	36.9384		5473643	27.5157														4829006	36.2253		3555508	37.0093		3478181	37.3779
																															4431277	24.7956		8298444	60.2162		3.98655e+06	77.713
