# Supplementary material for: Topological stress triggers persistent DNA lesions in ribosomal DNA with ensuing formation of PML-nucleolar compartment
Source: eLife. 2024 Oct 10;12:RP91304. doi: 10.7554/eLife.91304 (PMC11466457; doi:10.7554/eLife.91304)
Supplement: Figure 6—source data 1. [file elife-91304-fig6-data1.xlsx]

## Sheet: Figure 6A
Rad51 foci/nucleus
	24h G1	24h G2	8h G1	8h G2	6h G1	6h G2
	0	2	0	5	0	0
	0	0	0	0	0	0
	1	0	3	0	0	0
	0	1	0	3	0	0
	0	0	0	2	0	0
	0	0	0	5	0	10
	0	0	1	9	0	5
	0	1	0	7	0	12
	0	0	0	1	0	19
	1	0	0	0	0	9
	0	0	0	8	0	3
	0	0	0	5	0	2
	0	0	0	8	0	16
	0	0	0	0	0	5
	0	0	0	0	0	4
	0	0	0	13	0	21
	0	0	0	4	0	18
	0	0	0	7	0	10
	0	0	0	0	0	12
	0	0	0	3	0	14
	0	3	1	4	2	10
	2	5	0	4	0	4
	0	0	0	0	4	1
	0	0	0	3	0	15
	0	3	0	12	0	8
	0	0	0	0	0	5
	0	0	0	6	0	0
	0	0	1	2	0	12
	0	0	0	1	0	4
	0	0	4	0	0	25
	0	0	0	3	0	11
	0	0	2	0	0	2
	2	4	0	1	0	0
	0	9	3	0	0	17
	0	0	0	0	0	13
	0	0	0	5	0	17
	0	0	0	2	0	4
	0	0	1	0	0	0
	1	0	5	1	1	8
	0	2	0		0	4
	0	2	0		0	29
	0	0	0		7	9
	0	0	0		0	15
	0	1	0		0	8
	0	0	4		2	17
	0	0	0		0	5
	0	0	1		3	18
	0	0	0		4	17
	0	0	0		0	3
	0	1	0		0	19
	0	0	0		0	6
	0	0	0		0	18
	1	2	0		1	8
	0	0	0		1	9
	0	0	0		2	12
	0	6	0		1	16
	0	2	0		2	16
	0	0	0		0	14
	0	21	0		0	0
	0	0	6		0	0
	0	3	0		0	1
	0	0	1		1	10
	0	0	0		0	6
	0	1	1		7	25
	0	5	1		0	12
	0	0	0		0	20
	0	0	0		4	3
	0	4	0		0	3
	0	0	4		0	0
	0	2	0		0	18
	0	0	0		0	8
	1	0	1		0	12
	0	0	0		0	12
	0	1	0		0	5
	0	7	0		0	10
	0	0	0		0	3
	0	10	0		1	9
	0	2	0		0	10
	0	1	0		0	7
	0	3	11		0	1
	0	0	0		0	14
	0	7	0		0	6
	0	1	0		0	0
	0	0	0		0	2
	0	1	0		1	12
	2	1	0		3	4
	0				0	1
	0				0	6
	0				1	0
	0				0	11
	0				2	8
	0				3	10
	0				0	3
	0				2	13
	0				0	0
	0				1	15
	0				5	13
	1				0	15
	0				2	1
	0				0	3
	0				0	8
	0				2	6
	0				0	20
	0				0	2
	0				0	8
	0				1	13
	1				0	26
	0				0	5
	0				3	28
	0				0	10
	0				1	8
	1				0	14
	0				1	8
	0				0	14
	1				0	7
	0				0
	0				7
	0				0
	0				1
	0				0
	1				3
	0				2
	0				0
	0				0
	0				0
	0				0
	0				27
	0				3
	0				0
	0				1
	0				1
	0				0
	0				3
	0				2
	0				1
	0				4
	0				0
	0				18
	0				0
	0				1
	0				0
	0				2
	0				0
	0				0
	0				0
	0				0
	0				0
	0				0
	0				0
	0				0
	0				2
	0				9
	0				5
	0				1
	0				0
	0				5
	0				0
	0				0
	0				0
	0				0
	0				0
	0				1
	0				0
	0				2
	0				0
	0				0
	0				2
	0				0
	0				0
	0				1
	0				5
	0				0
	0				0
	0				1
	0				0
	0				0
	0				0
	0				0
	0				0
	0				0
	0				0
	0				1
	0				6
	0				0
	0				0
	0				0
	0				0
	0				0
	0				0
	1				1
	0				0
	0				0
	0				9
	0				1
	1				0
	0				0
	0				1
	0				0
	0				1
	0				4
	1				2
	0				4
	0				1
	0				3
	0				0
	0				0
	0				0
	0				0
	0				2
	0				0
	0				0
	0				7
	0				0
	0				1
	0				0
	4				7
	0				0
	0				0
	0				0
	0				1
	0				6
	0				0
	0				1
	0				0
	0				1
	0				1
	0				1
	0				3
	0				0
	0				0
	0				0
	0				3
	0				0
	0				0
	0				5
	0				3
	0				1
	0				0
	0				5
	0				0
	0				0
	0				0
	0				3
	0				0
	0				0
	0				0
	2				0
	0				0
	0				3
	0				0
	0				0
	0				0
	0				1
	0				0
	0				0
	0				1
	0				0
	0				0
	0				2
	0				1
	0				0
	0				3
	0				0
	0				1
	1				1
	0				7
	0				0
	0				0
	0				0
	0				0
	1				15
	0				0
	0				3
	0				2
	0				0
	0				0
	0				2
	0				0
	0				0
	0				0
	0				0
	0				0
	0				7
	0				0
	0				0
	0				0
	0				0
	0				0
	0				0
	0				1
	0				1
	0				2
	1				5
	0				4
	0				0
	0				0
	0				1
	0				5
	0				2
	0				1
	0				1
	0				0
	0				1
	0				0
	0				0
	0				0
	0				2
	0				1
	0
	0
	0
	0
	0
	0
	0
	0
	0
	0
	0
	0
	0
	0
	0
	0
	0
	0
	0
	1
	0
	0
	1
	3
	0
	0
	0
	1
	0
	0
	0
	2
	0
	0
	0
	0
	0
	0
	0
	0
	0
	0
	1
	0
	0
	1
	0
	4
	0
	1
	1
	0
	1

## Sheet: Figure 6C
pRPA foci/nucleus
	24h G1	24h G2	8h G1	8h G2	6h G1	6h G2
	2	17	1	3	0	2
	12	26	18	13	3	3
	0	16	9	4	1	3
	9	8	5	10	0	3
	5	21	4	9	3	0
	7	4	12	13	3	4
	6	2	4	10	1	3
	15	14	5	7	7	6
	18	14	5	7	0	3
	4	7	0	11	1	2
	2	4	8	4	2	0
	21	5	5	5	1	8
	2	20	1	12	8	3
	3	5	8	1	3	3
	24	15	8	13	3	1
	10	11	2	5	2	2
	11	5	10	16	1	5
	5	28	2	9	2	4
	2	9	9	7	0	9
	7	5	7	7	3	1
	0	11	7	7	1	2
	9	7	0	8	0	3
	4	13	15	14	11	0
	4	13	8	6	9	5
	16	14	8	12	2	7
	8	11	8	5	0	1
	18	9	6	9	4	2
	2	7	15	7	4	3
	23	2	3	4	4	3
	5	4	8	21	2	3
	1	2	2	5	0	0
	2	7	3	2	0	9
	1	10	4	6	0	0
	2	13	9	14	4	1
	7	13	2	11	14	10
	5	43	5	14	2	1
	18	4	0	8	4	14
	5	8	7	5	3	4
	3	10	7	13	5	5
	5	20	3	6	9	5
	7	2	6	8	0	6
	14	21	8	4	10	1
	0	7	9	57	0	1
	10	12	5	8	0	4
	7	18	7	12	5	2
	12	24	9	1	7	5
	0	19	11	13	0	4
	22	5	9	3	0	3
	8	24	6	5	7	6
	13	0	11	11	1	6
	8	0	7	10	9	6
	2	20	10	6	0	1
	2	8	9	14	5	8
	4	9	8	1	3	1
	9	21	7	8	4	6
	6	7	6	9	2	1
	8	5	0	6	6	9
	8	6	6	10	0	8
	8	7	6	16	0	2
	8	13	5	12	2	5
	8	9	12	6	1	6
	8	8	0	9	1	1
	12	8	2	3	3	14
	12	5	9	10	10	0
	3	6	10	10	4	4
	11	19	7		3	3
	0	1	9		0	6
	2	16	14		2	6
	0	4	6		16	3
	10	14	14		2	4
	0	10	5		2	0
	2	9	7		0	2
	3	3	2		6	4
	3	10	6		5	11
	10	10	12		14	12
	2	13	6		11	4
	6	15	10		1	4
	4	12	12		2	5
	10	11	2		0	2
	3	21	5		1	6
	1	8	1		2	3
	3	5	12		0	7
	13	19	17		7	12
	2		5		6	2
	4		0		1	2
	4		8		20	1
	7		4		2	6
	11		7		3	9
	2		9		1	0
	6		5		5	1
	8		3		1	3
	14		8		4	3
	4		1		7
	22		12		6
	4		8		3
	5		4		0
	20		9		10
	9		7		7
	12		3		4
	14		0		15
	4		7		2
	5		15		1
	7		5		1
	0		6		0
	4		8		1
	0		0		2
	4		6		10
	6		9		0
	7		1		7
	2		5		3
	3		2		7
	7		8		4
	2		1		5
	7		4		4
	5		4		0
	10		4		1
	2		10		2
	2		6		0
	2		3		1
	3		10		5
	5		1		0
	5		9		10
	4		7		1
	2		7		9
	0		0		1
	2		3		4
	7		3		14
	1		4		6
	6		10		0
	18		0		0
	19		1		1
	18		9		12
	1		0		5
	1		13		2
	14		12		3
	35		1		6
	12		5		9
	6				2
	4				7
	3				2
	14				2
	18				2
	23				3
	3				5
	5				2
	1				6
	7				2
	1				1
	15				11
	7				3
	0				3
	6				7
	7				0
	3				2
	7				18
	16				8
	6				1
	13				6
	8				0
	2				11
	9				0
	11				11
	13				0
	13				12
	3				9
	14				0
	5				5
	2				7
	4				15
	10				9
	2				5
	4				4
	3				0
	1				20
	0				2
	3				0
	3				4
	13				12
	3				2
	1				1
	9				2
	27				2
	3				2
	7				6
	10				8
	6				0
	7				8
	11				8
	7				6
	7				5
	8				4
	4				2
	2				3
	2				1
	0				6
	4				9
	3				0
	6				0
	2				6
	6				16
	8				8
	2				1
	24				3
	4				0
	9				3
	1				2
	7				0
	4				16
	3				8
	2				3
	1				3
	1				6
	8				13
	4				0
	4				1
	7				8
	5				0
	3				11
	5				1
	4				3
	0				4
	9				1
	5				6
	7				0
	2				0
	1				7
	6				22
	15				5
	5				2
	11				0
	7				0
	3				3
	0				7
	6				1
	2				0
	7				7
	5				1
	11
	0
	7
	7
	2
	12
	5
	2
	13
	7
	3
	7
	0
	5
	2
	7
	2
	2
	3
	11
	2
	11
	4
	11
	1
	7
	13
	3
	6
	11
	4
	12
	4
	13
	6
	5
	5
	0
	5
	7
	12
	2
	10
	12
	13
	6
	27
	7
	7
	7
	5
	2
	8
	3
	1
	10
	0
	7
	3
	8
	3
	8
	13
	16
	6
	2
	5
	2
	11
	11
	0
	2
	3
	3
	25
	0
	22
	19
	5
	2
	10
	16
	19
	14
	13
	9
	5
	25
	13
	5
	14

## Sheet: Figure 6E
% nuclei with PNAs
I-PpoI_1d	G1	S/G2	G1	S/G2	G1	S/G2	G1	S/G2	G1	S/G2
	siNTpool 24h_G1	siNTpool 24h_G2	siNTpool B02 24h_G1	siNTpool B02 24h_G2	esiLIG4 24h_G1	esiLIG4 24h_G2	esiLIG4 B02 24h_G1	esiLIG4 B02 24h_G2	esiRAD51 24h_G1	esiRAD51 24h_G2
147-II	25	10.5263	4.05405	6.45161	18.8679	53.7634	9.02256	33.8028	8.33333	31.4286
147-III	17.922	12.064	5.5	4.08163	12.234	37.1429	9.09091	30.4348	7.43802	23.0769
147-I	18.5	4.34783			25.2809	37.5			15.8273	13.5593
147-V	13.3581	8.71212	2.5641	6.25	23.2877	43.75	5.7971	34.8837	9.80392	22.6415
147-VI	14.6	10							9.5	21
1 d R from I-PpoI treatment	G1	S/G2	G1	S/G2	G1	S/G2	G1	S/G2	G1	S/G2
	siNTpool 1dR	siNTpool 1dR	siNTpool B021dR	siNTpool B021dR	esiLIG4 1dR	esiLIG4 1dR	esiLIG4 B02 1dR	esiLIG4 B02 1dR	esiRAD51 1dR	esiRAD51 1dR
147-II	20.202	32.4324	6.5	7.54717	32.3077	64	20.8633	43.617	23.5714	66.2162
147-III	13.5	16.3853	6	7.69231	18.1818	37.3626	20.438	44	10.4839	28.4404
147-V	14.25	11.978	2.76243	12.1212	32.967	55	25.4717	43.8597	16.4835	35.9375
147-IV	15.5	16.6667

## Sheet: Figure 6F
DMSO (Mock)_1d
	esiLIG4 24h_G1	esiLIG4 24h_G2	esiLIG4 B02 24h_G1	esiLIG4 B02 24h_G2	esiRAD51 24h_G1	esiRAD51 24h_G2
147-II	4.5	24.5763	6.15385	27.2727	6.06061	18.6813
147-III	7.40741	28.5714	7.69231	33.3333	2.58621	15.7895
147-V	6.49351	15.7895	2.04082	17.8571	4.6875	17.7778
DMSO (Mock)_1d
	esiLIG4 24h_G1	esiLIG4 24h_G2	esiLIG4 B02 24h_G1	esiLIG4 B02 24h_G2	esiRAD51 24h_G1	esiRAD51 24h_G2
147-II	3.37838	22.0588	7.43243	21.6495	4.16667	23.5294
147-III	8.04598	24.1379	17.4497	32	6.39535	24.7059
147-I					2.17391	8.33333
147-V	9.30233	23.2143	5.33333	22.2222	4.13793	21.0191

## Sheet: Figure 6G
DNA	EdU
Total fluores. Intensity dapi	Mean fluores. Intensity CY5
1831628	1.87825
1.93407e+06	1.93699
2969510	1208.36
4230540	2.01527
4.01266e+06	417.682
3633861	336.916
2022465	1.81715
1.87437e+06	1.6703
3790837	2.64506
1803474	1.43536
2581799	278.942
4649874	115.041
3990150	17.3624
4822370	488.758
3397439	806.03
1.88285e+06	2.17092
1.68587e+06	1.74459
1910541	2.0918
2005737	8.82785
2.04842e+06	2.20982
4275796	1.65592
1.93074e+06	2.16749
2.00886e+06	2.02192
1843518	1.81042
1807258	1.51066
1974145	2.2527
1.85165e+06	1.69382
2201123	2.97984
3345983	1.186
1.90905e+06	1.6115
4.12089e+06	24.7087
3477646	750.809
1.73358e+06	1.99404
2032494	1.59406
1839572	1.86049
1.96033e+06	1.79628
4687478	4.76405
2073987	2.02848
3.50613e+06	1574.34
1911718	2.16768
1.86322e+06	1.6686
1848293	1.7545
1.8052e+06	1.68667
1899686	1.70298
1941968	1.50656
1816410	1.58856
2661069	800.237
1809942	2.02247
1619032	1.47969
1.71275e+06	2.46945
2290426	15.4032
1894865	1.91587
1.95553e+06	1.70233
4.14257e+06	208.552
3196336	139.932
3084935	902.958
2918077	603.608
1.87096e+06	2.00205
2664295	1.38538
4088771	118.078
2294382	1.32378
4846815	1.68529
2178890	1.22658
2176656	1.18718
2175892	1.39907
1994509	1.62766
3482324	826.784
2069092	1.68868
4170844	376.168
2355572	11.4904
3741116	221.464
2189600	1.69229
4079385	658.746
2222296	1.74435
3199907	684.934
2169903	2.4506
4410919	1.96635
4.0022e+06	650.312
2306874	1.83033
3823243	1088.15
2153066	1.65392
4402313	2.59778
4555247	1.79381
3897949	932.078
4477301	1.6334
1.89962e+06	2.69688
2247118	2.86339
3731436	1045.49
2.02976e+06	1.43683
3618816	757.734
2118007	2.22426
2055245	1.55575
2195770	1.6632
2034349	1.50087
3434472	960.304
3.76836e+06	429.999
3299663	320.993
2111267	1.99441
1998197	2.58026
4265979	2.60344
1949344	9.95809
2760393	1402.71
1921906	1.5043
2162893	4.16982
3759964	1.80429
3948949	714.324
1882776	1.94405
2080559	2.08771
3766077	1.38187
4037865	740.55
3685365	959.545
1739005	1.66002
3974523	2.62578
3121924	1631.82
1772886	1.20351
3998550	2.56721
3068297	1086.37
1892237	1.70246
3680830	611.95
2860570	469.076
3574191	0.97852
2044214	2.69516
3226139	257.563
2188628	1.78947
4522131	2.01318
3.50441e+06	735.672
2153042	6.13476
2224277	1.50694
1.98576e+06	1.65394
3828610	783.097
3984781	483.828
2855005	1066.23
3350199	587.466
4089107	297.228
3422405	711.604
2130661	1.89178
3705677	790.616
2190087	7.15968
2140045	3.39352
4445301	397.578
3987237	1.91638
1.86848e+06	1.74143
2157055	4.99129
1.83011e+06	1.72207
1.89945e+06	1.53477
2033829	4.06161
1.88099e+06	1.32834
3882069	1.57854
2058687	2.86987
3384704	259.676
4318155	10.6192
1.91532e+06	2.35822
1843581	1.59077
3667504	674.004
2038313	2.13865
2.08025e+06	1.87511
2102566	1.81624
2021156	1.47027
1996288	13.6757
1997565	3.29644
1959540	2.05791
2797316	602.676
2002780	1.91796
2014461	1.76704
1783836	2.15924
2.00921e+06	2.47135
4195707	2.05448
2082483	3.99433
2.02112e+06	2.84021
2688497	512.306
3353406	256.303
4507497	2.30261
2000173	2.80077
2080314	3.10322
1959628	2.17533
2895137	767.791
3394601	1160.43
1834642	1.96342
3014427	166.508
3.85899e+06	2.42143
4347318	7.3177
1726419	2.47163
2433536	176.994
4541872	12.2666
1801973	2.08023
1775206	2.68668
1740714	2.08606
1842775	1.57291
1.88027e+06	1.94196
1.88533e+06	2.19474
2074658	1.84162
1.7791e+06	1.96505
1822244	2.27914
2710859	509.64
1867144	4.60128
2147339	1.94444
4700651	5.72651
2.00681e+06	1.81627
3499728	579.163
2287318	1.71452
2139363	2.36244
2232326	1.31603
3518194	922.27
2239280	1.62256
4878257	1.39759
3.86659e+06	745.856
4648445	15.9122
2548493	72.9025
2258298	2.49789
2012147	3.26715
2027199	3.03288
4550500	2.92885
2126001	1.41542
2116412	1.19496
2246353	2.1103
2039404	1.64334
4.1176e+06	2.92486
2150074	1.62083
2111067	1.8719
4361133	2.98836
2166450	1.39316
4006087	1008.34
4050150	499.745
2233000	3.0412
2158262	1.94479
2249365	1.73046
2189436	1.70664
2537977	2.71921
2187902	2.28445
2041587	0.905508
4581418	1.50972
2025374	1.1706
2101332	1.19817
2003362	1.72286
2062210	1.51493
2399475	1.84813
1747710	1.72684
1724098	2.1228
1530142	1.55817
2942680	707.814
2758732	593.123
2673735	728.342
1.89788e+06	3.13224
1.64213e+06	2.09914
1725608	1.92278
1693334	1.62852
1799046	2.94932
3501816	1.71267
2842566	773.019
4423223	2.37074
3232803	1.51601
3.89791e+06	772.911
1914685	6.66246
5147614	387.684
3597983	717.654
1762436	2.3064
2283947	279.867
3611016	265.012
2986388	529.143
3542540	1.99516
1562868	1.86554
3113697	566.498
2954850	324.388
3815590	4.94752
1728080	1.62568
1709487	1.54755
1701382	5.13192
1684969	1.79988
3468939	1.5911
3189195	251.032
1567684	1.57324
3511993	30.6643
3216684	300.281
3476430	26.3793
3136868	677.216
1626028	1.70596
1617661	1.5638
1591188	2.11136
3628202	173.472
1669675	1.96323
1.75604e+06	1.22263
1632091	1.37099
2736430	614.826
1533331	1.25438
3032148	1106.29
2319876	163.525
3236848	584.074
1566291	1.82523
2819582	416.637
3369127	689.174
1905249	1.47851
2227541	1.80973
4101926	595.286
2223692	1.14616
2020319	2.01449
3839715	1020.93
2215789	13.9552
2142001	1.06442
4323207	28.2445
2234324	1.42243
2257353	1.78291
2.09578e+06	1.42795
2086777	1.29687
1.90704e+06	1.68669
1774689	1.698
2236297	1.5045
2148123	1.4569
2168400	2.52029
3426803	709.404
2155607	1.68629
3268087	124.483
4487703	1.65459
2118567	2.03949
3472129	555.516
2034406	1.61159
4545211	1.54313
2298386	2.01885
2243800	1.56061
2151827	2.08724
2193273	1.62681
2188567	1.99483
4156985	430.242
2157822	1.21573
4616641	1.66345
2.07947e+06	1.25
2.07432e+06	1.76683
2.01487e+06	1.50966
2033293	1.44207
2121233	1.0355
2117171	1.44217
2.62516e+06	446.623
3173126	134.186
2200692	1.53273
3954066	833.41
2132422	2.68548
1998125	7.79922
4427369	1.24562
4667526	1.35826
4064901	281.399
4327698	1.22953
1909426	1.23932
4011425	3.04786
3913287	710.185
1839096	1.19983
1965044	1.34941
1998019	1.17278
1.87195e+06	2.31236
2013071	1.44413
3113436	648.245
3.78266e+06	520.94
2734034	530.514
2.07937e+06	1.27803
1993554	1.47463
2017081	1.64413
4692944	1.89897
2155435	1.84397
3699518	1203.38
2053537	1.66471
2.0777e+06	2.24804
2144091	2.73906
4192750	1.20337
3.97916e+06	508.524
2174985	1.29016
1955391	1.95034
4432635	6.37954
2029481	1.09961
2.94559e+06	1269.92
4449033	1.35508
4438908	2.31807
4.10432e+06	740.153
2122406	1.59067
2189458	36.8259
2125264	1.41083
1918604	3.69474
1914573	1.34365
2068769	1.35482
2464646	207.011
2033866	1.76099
1996157	2.88266
3767619	1.78921
3239142	338.144
3018969	949.506
2902720	810.671
3.52769e+06	602.379
2016290	1.48603
1845171	240.575
2057015	1.29438
4728891	1.57289
2162989	1.6445
3849056	683.148
3449292	487.576
2313948	1.6529
4726312	2.66894
2139068	1.93991
3111826	123.048
2227414	1.71926
4247729	1.61104
2208086	2.14587
1961623	5.79076
3786544	514.61
3026931	1224.12
4.13781e+06	896.497
1968531	9.48006
2109851	1.26333
2104870	1.89762
1.78817e+06	1.89975
2953568	674.532
4282906	1200.3
2079945	1.78395
3.31273e+06	709.195
2145801	2.45192
3355268	1201.09
2076819	2.00857
1906771	2.081
1967664	2.04177
2195102	3.65492
3712775	796.876
4242071	1055.95
4231938	421.277
2093626	2.19338
4229853	25.8603
2098974	2.62297
4358815	1.56012
2092367	1.41222
2.01743e+06	1.40646
3.7147e+06	1.09375
1874013	1.42842
3721585	513.38
1.90024e+06	1.31819
1898584	1.06662
2139985	1.94255
3150352	398.064
2017559	1.92129
1.77054e+06	1.21216
1868286	3.77204
1919005	1.95687
2199473	126.482
1919063	1.36934
1478729	4.94541
2953497	622.598
1950033	1.18336
3283228	561.879
2035205	1.68101
2.03969e+06	4.40409
2981897	701.248
1601950	1.58232
4067559	1.8711
1740571	1.19365
2060768	2.51347
1855421	3.0386
1629405	11.1506
2951916	558.973
1860704	1.27071
1824418	1.81241
1933934	1.63017
1736637	1.69157
2.03079e+06	1.52051
3692347	763.718
2.01166e+06	2.39605
3951215	665.218
1903477	2.76625
3.69158e+06	240.784
4418692	1.88522
2725845	505.396
2740375	668.922
1738719	1.10246
4255411	1.90587
1860853	3.7826
3765160	1228.39
1.99981e+06	1.35821
1.76741e+06	1.58251
4650264	0.924023
1837426	1.32245
1950087	1.36201
1749860	0.794777
3739180	2.47534
3306469	1.55748
1571144	1.54953
2168571	1.95178
2119075	1.8236
2135995	2.31079
2006062	1.9095
2079250	1.56798
2230653	2.47861
2237625	2.7414
3318811	692.762
3901723	1238.73
3396844	1227.77
4289161	143.117
3006433	1040.21
2008213	1.39017
2243247	2.97143
1726172	1.17306
2051062	6.93337
2.09037e+06	2.96846
1.71461e+06	1.52284
3877148	13.4702
3826386	851.485
2050459	6.84586
2.09105e+06	15.4936
4543286	862.297
1.91629e+06	3.18756
4230280	20.6289
3819097	367.782
1940475	3.07088
3.20483e+06	765.295
2734111	122.164
2.01165e+06	2.40361
3583744	497.687
1908987	1.68656
1981036	19.1708
4202389	2.96814
1868344	29.2826
3.70078e+06	847.597
3528730	1096.34
1839435	4.68609
3925659	1.87457
3.68198e+06	206.161
3555149	238.191
3.3621e+06	592.508
1.91241e+06	2.65667
1944202	2.81115
4455939	1.91631
2019679	1.23289
1915109	1.40893
2269163	2.02018
4770780	1.717
3046865	330.872
2166836	14.0066
2106128	2.59905
2.08725e+06	1.60776
2175189	3.50094
2303256	2.13826
2354261	33.5909
2032856	2.18027
2.08029e+06	1.85974
1907314	3.64058
2017486	5.81624
4395612	2.89247
1.89408e+06	3.42417
2682955	148.684
2262958	32.4814
1995419	8.67584
3272432	784.06
2203417	24.4773
2356225	68.0848
1829306	1.83759
2200230	12.3043
1760275	2.4689
2029024	2.44792
1.97138e+06	3.75477
3.38568e+06	1077.43
2170874	6.55029
2020919	2.48798
4310268	4.95313
1853514	5.04946
1923554	2.43916
2284801	1.79202
2251081	25.3306
2955113	1611.07
2356429	1.38862
2046818	15.2139
2010581	5.58142
2337582	4.55151
2476743	760.099
2200702	1.42684
3.9679e+06	508.904
2119548	4.02351
4912928	2.32646
4281966	2.17952
3436949	979.981
4614770	687.746
4718958	1.89816
4805894	19.6971
4918755	3.24028
2204215	10.997
2376161	2.53648
2413773	1.84221
4.17686e+06	3.52095
4433279	726.92
4534651	1.80048
2153006	1.6401
2353721	1.71599
4715344	1.84742
2312727	1.72346
3471029	437.107
2357873	1.7302
2232259	1.64318
2283731	1.9005
2344435	3.36221
2385552	11.4811
2729521	155.724
2043423	2.3588
3288707	502.18
2222386	1.78787
4349937	2.01297
2164833	1.94968
2124316	2.25507
2189917	2.02406
4601976	1.63015
2114076	2.22831
2382202	2.56478
2125036	86.3698
3860590	718.245
3683682	1.82073
2197612	1.88931
1905529	2.04417
1755795	37.4501
1971640	2.06144
4378351	2.29322
2054952	30.9261
3653268	680.228
3648880	419.761
1886565	1.87426
2137363	3.40621
3213287	393.088
2627248	94.8124
3780225	1027.04
4126771	3.59033
4773677	1.72731
4.06739e+06	2.10172
2141361	2.37301
1893501	2.33499
4068246	457.208
3039707	429.994
2092174	1.54064
4.01666e+06	2.80657
2207971	1.57422
2043675	1.26391
2215456	1.6381
1919091	1.67504
2019013	1.2689
3.24174e+06	362.638
2191636	1.99355
1.86623e+06	1.32435
1815234	1.24429
2050955	1.92328
1.94056e+06	1.27031
1935642	1.25086
3507641	670.201
2263608	1.7749
2051407	2.35632
4595369	13.5588
1962108	2.77207
1959578	2.21197
3822748	628.843
3599668	618.199
2204355	2.39316
2010355	1.78576
2120523	2.48013
1926629	1.87151
3001525	297.609
3195000	258.773
2195160	2.89412
2224167	2.48977
4503315	78.7703
4228794	1.53065
2182049	1.50525
3667509	1.51074
4.04846e+06	1.60566
2056024	4.69861
3618179	576.498
1915700	1.66525
4551402	1.64108
2267010	2.04759
3230934	720.243
2438003	54.8419
2296856	1.51857
2295930	1.65953
2233751	1.64317
2211576	2.48072
2218439	20.5667
4318496	620.078
3134492	722.049
2237620	8.81617
2114657	2.20279
2150373	1.87687
2492376	2.46182
2217534	1.60644
4739724	287.914
2259323	1.72961
4683937	4.61987
2231327	1.82073
2202692	2.04791
2340723	1.93174
2238475	1.64364
2341655	3.69748
2103122	1.3016
2478341	1.76392
2204819	1.55899
3.64525e+06	843.989
4063812	1034.86
3227931	1.97388
2431008	2.56853
2070894	1.66829
2135785	2.41232
3220687	1178.76
4302027	2.8195
2270333	2.21928
2192085	1.65565
2006751	2.52803
2173194	1.74152
2036059	1.30989
1943308	3.28664
3773236	1248.27
2159945	1.3263
2174125	39.8966
4317813	205.952
3939091	359.316
4.10463e+06	31.4489
2281386	1.37323
3811260	762.773
1811039	1.93589
2054957	2.03212
2217614	2.38578
2585653	1.62824
3.92172e+06	849.406
2492762	1.15198
2366302	2.17394
2052878	6.2881
2232039	2.14082
2232494	1.84399
2549284	1.49538
2413553	1.53546
4473573	1040.38
2460026	1.94253
3146362	790.569
2480490	2.72873
2644946	2.13747
2361428	1.49176
2311771	1.70088
2343778	1.38442
2726269	10.8808
4830900	1.53909
3738047	400.72
2502563	1.23399
3.84888e+06	612.975
4464445	202.802
2311965	2.26615
2303222	2.10445
2183521	1.52169
2266569	1.55407
3793444	401.137
2277926	1.69251
4334972	158.258
2615400	279.556
3697544	1.62421
2398519	1.75522
2006553	1.7475
2556641	1.44032
3806879	480.871
2300559	1.57778
4.15738e+06	305.361
3701824	309.602
4373903	365.402
2340611	2.10639
4724512	93.6426
4282556	652.195
2249835	2.94742
2361510	3.54536
2203730	1.77214
3.91772e+06	771.793
2296086	2.38799
4611349	1.51834
2288345	1.25417
2381613	2.02685
2081695	1.27204
2427410	2.57977
2184071	1.48629
2155817	2.5692
3961071	1332.58
2227666	1.9284
2110212	1.70723
3160731	686.315
2154539	1.70836
4649130	782.289
2280398	1.85917
3134723	1162.2
3116426	1151.19
1939583	2.07199
3533584	816.865
2106417	1.76383
3477902	953.483
4552019	487.555
2375744	2.12156
2373099	3.57223
2252462	1.72574
2493723	2.30454
3191813	426.749
1853809	1.32447
2333045	3.00799
2227333	2.22227
2233828	3.49037
2782971	292.298
3362903	301.131
3166158	650.171
3960977	2.04542
2216930	1.47715
2080239	0.905458
2067533	1.27101
2315857	3.06457
4235440	710.407
3599892	438.678
4932741	1.56803
4358233	19.3326
2434733	2.79447
2364130	1.5803
2368442	1.06348
4.13555e+06	283.327
2505211	2.76887
2379448	1.59869
2344444	1.12749
2217678	1.69948
2389576	1.77839
2414699	1.83622
2394976	1.56744
2307363	1.28162
3885383	228.592
3.86221e+06	34.6574
2420614	2.11701
4071203	1193.63
4302299	1.07998
2405831	1.17267
5097229	6.46608
2177649	2.07794
2520118	1.90235
2077220	1.58528
3460727	3.78471
2026189	1.26496
4543229	3.54387
2298719	1.41769
4240540	838.858
1875519	4.42502
2205047	3.25258
2235347	1.18847
2253776	1.34246
3.66572e+06	843.542
4380290	668.426
2188527	2.00417
2354017	1.90946
5016813	3.2196
2241410	3.03289
2212364	2.02729
2173636	1.62191
4322614	1.42559
2188670	1.03923
2266576	1.46659
3899325	479.137
2268456	1.83598
3759300	522.975
3.22364e+06	997.39
4185174	543.224
4869553	2.02586
2289734	1.25552
2302810	1.49254
2197625	1.44408
2104789	1.30294
2194268	1.56814
4268389	576.282
3601876	274.633
2414441	1.92391
3973467	747.899
3856476	569.882
2228706	39.2222
2187817	1.68049
1921737	1.50537
4680207	9.11017
3121730	2.05159
2312236	1.70496
4542614	1.98458
2265606	1.96478
2105855	1.15975
2344993	1.53777
4880249	1.32727
3125353	272.721
2180204	1.44167
2391765	1.3601
4013839	1.23357
2255003	1.61609
4889970	1.90055
3.60904e+06	170.53
3066580	337.729
3230189	1041.08
2070376	1.15417
4455564	1.6712
1995306	1.37782
3.51446e+06	518.912
4282543	44.3506
1892924	1.34428
4272647	87.9527
3027594	577.978
2736445	625.796
2576397	135.381
2677962	901.715
1919470	1.13633
1814108	1.23961
1831827	1.02466
1842717	0.804991
4514594	1.34427
4371157	1.4611
4517600	0.743445
2014849	1.1034
3554211	1.21192
2.07697e+06	1.1559
1784987	1.04399
2131809	1.60502
2015414	1.23765
1856392	1.14746
3158299	284.387
3297843	776.265
3.7948e+06	1.75851
3666390	1.48417
3.66805e+06	17.7741
3576037	419.371
1709946	1.1005
1785192	395.57
2.07323e+06	2.44345
1909704	1.26649
1812004	1.22407
1970997	2.09183
1841045	1.40803
1.81144e+06	1.29526
1.76369e+06	0.995373
1777393	1.28591
3959688	1.02282
1.79356e+06	1.46217
1941593	1.60799
1.90816e+06	1.18526
4203815	1.20258
1945105	1.32044
1801572	1.31468
1991627	1.22629
3623058	413.869
3756860	2.2742
3.73086e+06	441.285
1915367	1.62286
3165183	416.596
3153608	386.499
2100813	6.83665
4063264	1083.42
2701780	896.032
3378479	1009.5
2043244	1.9322
1668085	1.49185
1900053	1.43428
1793099	1.81084
2961442	282.701
3.28847e+06	632.673
4175477	2.28554
1.97792e+06	1.83478
1757488	1.44637
1816294	1.80207
1610687	1.37892
1906953	1.67883
1.98599e+06	1.15776
1946103	1.43972
1998800	1.4649
4307332	3.39616
3391374	942.468
1765251	1.38644
3026442	319.287
2029643	3.19734
1973252	2.67965
3402201	682.874
3154603	743.686
1739370	1.40649
4214394	2.92256
3721222	600.216
3185507	397.995
1.97223e+06	2.24343
1866009	2.49039
3625995	933.799
1835908	1.76532
3.6041e+06	542.511
4023569	704.659
2.01003e+06	4.85459
3875511	665.819
4.13021e+06	706.584
4060366	70.3457
2055825	2.29421
2048225	1.88817
2.07645e+06	1.64405
2030942	1.29679
2053371	6.19259
2.03555e+06	2.11682
2046259	1.88676
3896541	418.462
1875436	1.8974
4163278	699.798
2069656	1.53009
2.03032e+06	1.17409
2573068	1063.15
1.95316e+06	1.5961
3.63701e+06	262.468
3.78594e+06	360.832
3659494	707.705
3486303	345.922
1883741	1.75894
1727474	1.36084
1.82248e+06	2.33188
2267256	1.31557
2065012	0.774081
2187505	2.43986
3.99627e+06	1.24925
2.07981e+06	1.12038
1943451	1.30696
2035339	1.18274
2116922	0.980911
4536539	53.1889
2223335	1.63238
3732354	577.476
4185673	2.66384
2304080	1.06848
4213342	1.29243
1650599	1.29863
4402009	1.50784
1710793	0.809652
1714675	1.06138
3081108	475.603
4330559	1.88121
4263649	681.334
2118049	1.21056
1993110	1.12435
2031206	1.2254
3618175	291.232
2179016	3.18039
2180014	1.0808
2285845	1.51124
1979943	0.942698
2175926	1.4094
2172859	1.11444
2125304	2.62781
3527433	1127.34
2171991	0.954876
3602315	634.683
2045597	1.20358
1996716	2.03996
2196946	3.63584
2056777	1.27693
1.98888e+06	0.88946
1.7213e+06	1.46327
1557380	1.61483
1806726	12.4588
3832346	2.90918
4130876	2.62928
2098160	2.8532
3.16749e+06	499.087
3139209	228.004
4236628	80.7897
1.83483e+06	1.8908
2293179	328.393
1.88013e+06	1.46046
3597571	206.932
4368901	2.5845
2089414	5.15412
1.90595e+06	1.38667
2100753	1.33557
3307514	316.411
1.78256e+06	1.15137
1855845	1.60181
1786267	1.08941
3490986	198.347
2145617	861.889
1.97435e+06	2.03433
1816926	1.27272
3642927	421.914
1.88703e+06	4.41771
1.91702e+06	1.68697
3544214	1392.62
1.86022e+06	2.05682
1942147	2.32552
2025784	2.42111
1.95035e+06	2.06912
1901548	1.96527
2000468	1.7633
3.73006e+06	666.824
4.03105e+06	1.78402
1874189	1.54254
2102041	1.87472
3.61906e+06	280.032
4.08093e+06	8.59779
4002960	2.4352
1896291	1.32679
2987136	649.791
2.04814e+06	1.93361
3.89547e+06	286.003
1.80729e+06	1.32947
1837521	1.56862
1912271	2.26615
2849572	420.251
1935603	1.2724
2141808	1.19268
4292697	1.4779
2001842	1.18676
2059005	2.24035
2190567	1.77596
4210038	1.76591
2178391	2.74512
2819382	608.098
3773049	508.114
4575460	1.70269
3399846	346.311
2689121	1676.65
2203499	1.78826
2215437	3.36126
3799362	1.90633
2187067	1.96198
3552815	819.099
4264402	2.24861
4724498	22.0248
3786665	311.759
2366232	3.36464
3689983	258.45
4224317	19.6485
1947260	5.54442
1853599	2.08107
2143796	1263.71
3433374	487.974
3592572	385.761
3209975	1099.13
1.99049e+06	1.95387
1803150	3.41233
1872870	1.59975
1917624	2.03094
2844194	404.039
1716458	2.88474
1820959	1.49359
3574416	234.652
1760410	2.13228
3056535	567.562
2122552	12.9465
1753604	2.82932
2172180	2.26588
4306742	47.8948
3640613	619.452
4317354	316.319
2361932	1.66422
2205943	1.83386
2082980	1.60596
2137946	2.7118
2245682	1.49303
2812436	924.557
2956810	640.977
1908838	7.45002
2248978	1.88176
2332707	2.12219
2136680	1.77163
2069877	4.26258
2223127	5.07878
2052511	2.60352
2044357	2.63143
3536902	1227.74
3729359	867.265
2065038	2.39514
2306927	5.9857
2698145	89.4046
4314070	2.34767
3.83099e+06	1115.4
2363163	2.05457
2250337	2.15628
2291311	2.29419
2319280	2.83336
1931196	2.64088
3.56527e+06	608.757
2296053	2.06242
3730789	486.889
2025299	1.83624
2605203	2.21144
2349763	2.83914
2502624	25.4848
2226818	2.09421
4.15558e+06	32.437
4548300	2.1654
2004119	2.00483
5026514	2.17547
2598610	2.64711
4829770	2.9406
2493592	3.12095
1998132	4.26554
4307781	423.485
4062614	2.44832
2397240	2.30047
2432740	3.06911
2687958	5.29555
2090964	2.4547
1973021	5.5919
4512409	420.42
1711876	2.20177
2316590	1.63915
2377243	1.55689
2398611	2.09646
4373145	8.17863
1923602	5.78216
3504600	3.25723
2945364	371.565
4424593	2.89539
2249913	6.28458
2579739	1.73498
2411180	2.0206
4797391	3.0375
1.97199e+06	5.36562
3879718	428.778
4664328	2.38656
2151858	2.6137
2813499	769.114
2117440	2.58341
2173383	3.22055
1968690	2.29167
1949366	3.13342
3935160	2.86527
2374175	570.375
4621687	4.26979
3236484	162.385
2.09496e+06	2.89078
2156744	1.70511
1901956	1.73852
2003513	2.47231
2102411	2.49288
4346147	2.18511
1938429	1.58393
4871909	57.492
2136536	1.93677
2.04776e+06	1.32141
2523417	798.321
4366526	3.15469
2160464	2.83662
1.93001e+06	1.47362
4233888	2.04562
2043974	2.22524
1.94918e+06	2.37731
1.96795e+06	2.51066
2187706	2.53534
1894413	4.01546
1849314	2.53757
2106792	3.30063
2207956	3.38542
3897177	2.66069
3.65745e+06	4.55538
1756239	2.95482
4502238	2.99536
2057508	31.5016
1.93616e+06	2.41905
2270494	3.97073
2794996	1633.08
4.03227e+06	3.00931
1.92199e+06	1.94962
4401390	3.18856
3578444	12.4796
1969888	1.82555
2144963	26.8551
4200777	285.584
1780321	2.6
2225334	4.00841
3.34344e+06	831.96
2203359	2.37595
2088377	2.37552
2205355	3.97827
2062418	2.69786
2181435	2.93486
4261244	2.50802
4466515	10.4583
3345228	1258.57
2208788	2.48051
2244508	2.49656
3047578	1736.98
2191874	3.19893
2286268	5.32034
2.08299e+06	14.9822
2063545	3.62108
4296640	43.34
2.04575e+06	4.09236
5065289	937.879
2291987	3.89391
2165418	4.11983
2332720	3.41937
2395086	884.561
2096463	2.68324
2326045	5.00475
2148681	2.77299
2230940	1199.11
2150275	2.50897
2147501	2.78826
2119385	2.30793
2000244	7.7195
1.80137e+06	3.53128
2077020	2.15791
3343473	1421.23
1.97808e+06	2.64026
4561396	2.82592
1887476	3.16674
2142479	1.8859
2977794	819.792
3.96937e+06	316.386
2159760	46.8892
2134864	4.12466
1925330	4.9998
3912932	12.7568
1899199	3.72535
1.9154e+06	2.26062
2.0416e+06	3.32694
3708780	1368.04
1885764	1.94711
3545246	1016.95
4477886	2.16069
2139042	5.39661
2086123	2.74239
2182395	2.22707
2294113	3.71973
4629098	10.5814
2337167	3.05878
4589995	229.64
2146344	2.77252
2181821	3.36403
2122282	1629.87
4407026	556.591
2443923	75.4184
2265055	3.01441
2268766	2.18132
2124610	3.92749
2098800	2.60386
2240914	2.30012
1998301	3.48908
3643023	2.36385
2247010	2.52987
1969144	2.13766
3286887	1170.62
2364555	1.87743
2.06218e+06	2.04374
1.92252e+06	2.03455
2240777	3.84841
1767858	1.89729
4775318	2.599
2204456	1.14839
2171019	2.47761
4442169	1.52594
4261716	576.042
2.05964e+06	2.04285
3576865	420.663
2325343	2.1087
4019281	1.87148
3414655	983.647
2380906	44.639
2007585	3.20794
1843978	2.96053
2032147	1.88055
2110319	4.15965
4511850	3.35707
1880383	1.97055
2445588	2.47861
2211945	1.85426
4118240	763.833
1948477	1.37827
1.99994e+06	1.67773
4767677	20.5581
2201052	2.05228
1831637	1.7746
4.14595e+06	1.96844
4259865	1.81195
2100063	1.56093
1915241	1.41458
1.88083e+06	1.30801
2202603	2.13208
2001241	1.59118
1866726	2.98314
2373254	2.73453
2028651	1.1697
2180091	1.76336
2077780	1.14984
2267437	1.66135
2157492	1.57466
2058400	4.37188
4447556	6.02125
4836942	1.60103
2190285	1.95125
2206722	1.59573
3002769	3.96226
2289968	2.49519
4682570	268.089
2017457	3.16312
4099266	674.583
2160876	3.08398
2195503	2.26635
3364692	238.16
2309699	4.90298
2331324	2.46536
2284668	2.03246
2308072	1.47332
2239628	2.6555
2160453	1.49672
2231405	2.8936
2155394	1.72995
1.8672e+06	1.88351
4550892	634.455
2032834	2.05666
2102662	3.60645
2742992	1278.14
2199123	1.54205
2187110	98.8623
1995375	2.77577
4369355	1.60451
3593905	657.343
1787802	11.0163
2.2571e+06	443.01
4321431	1.6051
2.08303e+06	2.67765
3860999	3.32348
2060378	1.42312
1921406	1.36169
1908680	1.49662
1898987	1.06565
1811343	1.94013
3.69466e+06	834.566
2.05061e+06	11.2408
1862309	1.46824
1823240	1.55948
2081565	1.82765
3062498	970.023
1864914	2.16399
4167907	1.83127
4.08217e+06	15.2092
3392350	762.718
3631991	2.72897
1.87417e+06	1.95829
2880501	849.086
4288324	1.59059
3794011	3.59487
2175568	881.936
3475900	448.05
2149703	2.44535
1.98918e+06	2.39399
3343342	3.59385
1.93583e+06	2.44872
1.86532e+06	2.20967
3848874	1023.9
1886740	19.6723
3539677	753.711
4416090	2.23345
4107510	1057.68
2045373	3.09748
1.98473e+06	17.2667
2325337	1.97965
2124260	1.80638
1.93641e+06	1.3395
2376958	662.757
1.83593e+06	23.2966
2229226	1.84089
2239335	1.61369
3824964	590.842
2287455	1.48447
1938433	1.44014
4928508	2.01425
4149019	702.473
3488599	718.586
2295311	1.34521
2.06051e+06	1.82911
2264220	2.29387
2337093	3.36624
3528207	853.959
2229739	1.37409
2060090	2.33243
2320189	2.68776
4258868	466.886
1907103	2.12888
2137763	1.20067
1872881	1.63964
3.8577e+06	743.853
1973656	1.37947
3213778	554.964
3379906	1.79152
2009891	36.7753
2414565	3.47172
2521853	1.32224
4868596	579.436
3.89863e+06	401.085
4641346	255.724
4762266	12.8756
4428390	383.06
2338317	1.98046
2281499	1.34913
2236594	0.95403
4271998	656.462
3388403	1362.72
2177290	2.92893
4795930	2.00906
3804305	279.538
4001515	939.447
4.15456e+06	304.365
2379224	1.74081
4899495	3.9202
4713141	1.97023
4779486	2.85412
2327556	1.4772
2372804	1.29921
2237961	1.32098
4192362	709.528
4828896	97.5666
3412361	127.623
4779016	4.39644
2165235	1.66598
2294197	1.25448
2501900	1.86017
2.02072e+06	2.28449
4368608	812.698
2494820	1.6634
2597099	2.5614
2399630	1.49002
2064793	1.67682
2143911	1.64952
1821454	1.34949
2070493	1.56504
4776812	3.8064
2128683	1.79094
4305524	730.649
5000545	47.8338
4225445	637.691
5133955	3.62812
2540532	2.27789
3497971	601.924
1842768	1.16299
2327274	1.85247
2114921	1.24926
3150793	460.179
2159911	8.08755
3898109	401.417
4119363	396.301
3180724	429.068
2211209	1.88794
2168691	9.49259
2190020	3.18413
2528645	1.88903
3241074	301.712
2598489	1.91568
2558928	1.19625
4604759	629.891
3915348	371.93
2368318	1.40193
4.06783e+06	550.15
4838228	1.21837
4805353	638.106
2390901	1.26719
2631133	1.83905
2387709	1.38156
2559610	1.65744
3472642	765.482
2567667	3.41071
2596842	2.16564
1945269	3.06464
5009248	1.25838
4855101	3.14948
4313432	741.854
3683268	411.697
2.61143e+06	2.19281
2557268	2.11102
2590635	1.47875
2524907	1.20657
3603929	498.205
2278019	1.32987
2290237	1.89562
2757395	1.64664
2493373	1.84721
4967589	1.54344
2390628	1.38263
2467541	1.80227
4911195	1.52194
4882774	26.6487
2422630	1.46085
2328279	1.45419
2467574	1.60271
2112178	1.96808
2353435	1.0763
2823475	1.17702
2301206	1.14079
5023566	2.99715
2264668	1.26438
2209776	1.37402
2283817	0.920203
2394684	1.12919
2254332	1.76401
2228711	1.15232
5006424	1.66692
2036989	1.09854
2281152	2.24851
4492258	705.253
2667914	4.13024
5064419	52.2721
2276487	1.36326
2100093	1.14216
2542123	1.27479
2569757	1.14105
2257514	1.30179
2513560	1.88072
2264504	1.64917
2515830	1.62686
2504514	3.56381
5026437	1.57228
4314933	981.135
3496139	1082.8
4768298	2.43311
2500196	2.82741
2437367	2.19598
2532471	2.16783
2271742	1.96551
3974340	784.847
2322290	1.28798
3536885	1005.04
2481991	1.9391
2493545	2.92643
2290177	1.57473
4479204	828.696
2192157	1.37448
4523249	94.8778
4694645	160.937
3.51685e+06	942.27
3297430	992.285
4332535	657.409
2122231	3.58561
3887691	691.025
2313351	2.24862
4796820	630.537
2368482	8.84729
2467446	2.34391
2381398	1.65104
2412079	1.15886
2480733	1.54856
2444775	2.13094
4136969	929.157
2341173	1.00279
4569635	1.58468
2295447	3.38623
2361635	1.32826
2390412	2.53061
2346772	1.6147
2541189	1.28429
4143812	439.531
4316227	499.019
2256924	1.68015
2370020	1.45302
2278235	12.8876
3.69266e+06	680.56
2108284	1.12138
2273634	10.2907
4935143	1.80588
3290200	588.384
4382174	711.299
5002790	1.73049
2304792	2.00451
3984709	2.78213
2082584	1.96774
2361815	7.12591
3268108	7.12512
2202800	1.81482
2319944	1.872
4368796	618.932
2399061	1.78642
2343666	1.50979
2262816	1.47558
4560357	7.91701
2416937	1.40185
2350076	1.51202
2370098	1.68953
2530996	2.65436
4638037	2.03286
2214728	1.37465
4325813	952.872
2412323	1.30157
4720849	2.04797
4665950	1.6127
2154986	2.03503
2.08718e+06	2.49211
2403362	1.81207
2197128	1.05214
3773742	566.636
1870602	691.673
2260470	2.5569
2.05036e+06	1.23991
3061751	245.368
2210366	3.20781
3531097	530.702
2150108	3.87732
2265517	1.17256
1849934	1.90549
2156031	1.7278
2136672	2.77224
2296725	2.46395
4462462	641.733
2260547	2.75307
3864212	778.487
4257888	90.9808
2128298	2.38589
2285700	2.4814
2300867	2.17594
2094337	10.4221
3.85874e+06	969.087
2117780	1.33552
3250401	2.83649
4617393	2.56901
3560421	3.84366
4250419	517.414
4507330	1.99572
2422258	2.42556
2277098	1.44592
3.81511e+06	982.841
4445629	1077.9
2468379	4.23748
3612504	428.323
3851803	907.688
2079803	2.11387
2512609	2.04645
2503878	1.94857
3.25432e+06	2.91843
2522290	2.70158
2417933	2.17255
2258172	2.12892
2414650	1.94246
2333346	1.67361
4369553	797.405
2493380	3.73369
4271259	188.049
4273609	1109.23
1999344	1.3131
4940397	1.77554
4694673	43.8311
2228624	1.7716
2229555	2.01535
2365809	2.11068
2.02534e+06	1.35123
4949429	2.49166
2194557	1.74699
2291503	1.83409
2133919	1.68267
3905173	1131.08
4479436	126.092
2163460	1.31212
3088188	837.245
3.37191e+06	374.041
2842862	173.117
2142565	1.23187
4845030	1.79729
2.01869e+06	1.18118
1998215	1.18547
4235300	1047.08
2232580	1.78129
2399669	8.13986
4313519	660.373
2231304	1.69231
4131234	1.33735
4688361	1.66165
2202020	1.44806
2207197	1.51299
2194846	1.64613
3.93565e+06	507.082
4487635	5.52256
2117118	1.00629
4711170	22.8638
2309201	1.62541
2308717	1.70381
2370087	1.75462
4626430	6.38274
3585985	857.351
3.72415e+06	199.356
2241668	1.2238
2357330	1.31072
3719150	753.705
2937896	916.043
2.0859e+06	1.46312
2048612	1.7005
2262520	1.30554
1994413	1.44979
2064650	2.13198
2220211	2.31795
4522531	7.17312
2134072	1.78671
1686890	1.23714
2.04339e+06	1.66713
3.93691e+06	2.71067
2052100	1.22526
1736322	0.866322
1966919	1.37163
2.02564e+06	1.83074
1815877	0.763257
4361628	1.32702
3399633	2.05706
3237335	1.88329
2825132	338.081
1.83475e+06	1.5702
3.65492e+06	578.883
1991155	2.28951
3236130	1007.9
3348657	486.146
1715410	2.08212
3887138	275.454
1576480	1.41034
1997078	3.21635
3444040	8.72104
3795591	420.189
2375063	210.79
4.01413e+06	87.6543
2421414	360.825
1667634	2.47789
1763159	1.76562
1.73886e+06	2.67904
2970274	613.642
1806669	1.66661
3035315	213.484
3.54448e+06	401.899
1.65585e+06	1.71071
2602912	338.729
3.76291e+06	56.3588
3.77333e+06	6.80892
3551973	623.323
1671935	1.18878
4111781	1.45827
3472514	445.272
1808899	1.25605
3.54124e+06	1.00831
1597169	1.16609
3632574	16.1456
1662884	1.76851
1694762	1.3602
4064952	2.33749
3911520	1.44239
1800322	2.32183
1911004	0.912294
3060742	429.691
3244494	915.78
1908783	1.08657
1665309	1.82855
1.88223e+06	1.05984
1942028	1.20701
1607988	1.81398
3.46086e+06	2.07615
3.6805e+06	1.39257
1904648	2.14874
3.24749e+06	700.951
3854580	39.2377
3173959	534.065
3863860	3.31104
3615504	1.65072
3407742	697.493
3458459	947.546
1781778	1.57207
1798546	1.25418
1643833	0.95129
1506403	1.93486
3278870	1.33661
3194292	602.368
3530551	0.843112
1713968	1.60559
1765340	1.25192
1636683	1.17751
3.5935e+06	1082.91
2559621	221.305
1852611	1.59703
1665852	1.07295
3339205	571.856
3.92935e+06	1.29999
3447727	273.566
3536556	154.731
3.07775e+06	1018.78
1654155	13.7769
3829114	5.75429
1910644	1.59569
2731451	633.168
4318523	3.21237
1743522	1.92922
3647835	6.05084
3546456	266.645
3.46647e+06	511.168
3313940	509.813
3302421	1060.99
1.7573e+06	1.75338
1.85089e+06	1.76763
3.1873e+06	472.311
1.8136e+06	2.22382
3620566	658.888
2650472	151.953
3152606	867.634
1712300	1.2433
1762397	1.69343
1796332	8.20664
3334604	1.03673
1756788	1.41033
1914116	1.75586
2040209	1.61226
3.44221e+06	567.07
1.88533e+06	1.39173
1733915	1.19533
3452882	264.849
3125119	914.977
1.84262e+06	4.82828
3298905	442.318
3593925	1.49609
1774525	1.82819
3862062	1.01912
1.78401e+06	1.44453
1.72435e+06	1.78655
1844038	1.11155
2316672	348.735
1.7839e+06	1.59
1775966	2.27989
3226341	582.007
3.37866e+06	458.796
1826956	2.18654
1771397	2.22066
1.69363e+06	2.42427
3636988	433.786
3381082	672.075
1688251	1.41863
1589319	1.10185
3623879	36.4376
3.06285e+06	403.323
3343486	3.06621
1.94471e+06	2.17631
1651044	1.56546
1988781	1.98476
1802866	1.95986
1697650	1.63812
3585786	351.586
1844608	1.95558
3711974	593.173
1884357	1.41353
1637264	5.06766
1832635	1.57711
1.81374e+06	1.31133
3383904	285.171
3457211	268.179
3939965	820.689
1899240	1.52526
1982413	4.46256
4157897	2.43917
1948220	1.67222
1760458	1.6323
3574811	643.684
4025232	3.70986
3902211	1.9146
1.78908e+06	1.62495
1911212	1.27889
1893655	1.3035
2302093	680.323
1683203	7.38449
1869823	1.32274
3094911	697.642
3426350	1.28853
3208598	219.855
2088060	1.61667
2113644	1.31735
4432441	1.34286
2080728	1.23749
3359801	266.311
3633109	0.931392
3941343	1628.2
3622181	327.139
2173605	2.74194
2151715	1.75505
1986664	1.01196
3239263	634.037
2554399	313.489
1959577	1.43747
4103989	224.597
1797790	1.61177
1.93155e+06	1.26897
3.83208e+06	573.73
2119143	32.4171
2157536	1.68746
2011037	1.84904
2115917	1.43112
2060321	1.83236
4222571	1.52198
2000635	1.1966
3585969	1.71274
3829958	267.682
1837887	1.12831
1956025	2.58096
1857461	16.362
3605644	988.026
2219843	1.24237
4583694	1.17872
2198541	1.25578
2142253	0.96124
2144874	0.944901
4523526	1.35895
3594451	653.529
2068215	1.65618
4542514	78.1883
4341400	1.66395
2163017	1.35453
3451270	904.655
4088204	9.39692
4171524	355.192
2.07133e+06	1.20386
3469989	523.525
3794119	200.396
2132024	1.1723
4491804	1.18875
1.90914e+06	1.8765
2238135	1.36399
2102067	1.55344
3963268	760.047
[truncated: 1 more rows]

## Sheet: Figure 6H
doxorubicine
% nuclei with PNAs
	G1 EdU negative	G2 EdU positive	G2 EdU negative
I_TI AK	21	13	38
II_TI AK	11	10	29
III_PV 138	14	17	27

## Sheet: Figure 6I
% nuclei with PNAs
	esiTOP1 2d_G1	esiTOP1 2d_.G2	esiTOP2a 2d_G1	esiTOP2a 2d_G2
I	21.1538	19.4245	3	12.3288
II	18.6567	28	6.85714	15.5
II	28.8136	31.25	2.89017	10.9375
